# Supplementary material for: KAT8-catalyzed lactylation contributes to eEF1A2-mediated protein synthesis and colorectal carcinogenesis
Source: Research Square preprint supplement (doi:10.21203/rs.3.rs-2177254/v1), 2022-11-01
Supplement: Supplementary file 1 [file 298c94c5f02780ff5d59384e.xlsx]

## Sheet: Kla sites
Table S4-1	List of Kla sites dynamically regulated by KAT8
Protein accession	Position	Amino acid	KD/WT Ratio	KD/WT P value	Regulated Type	Gene name
P30046	33	K	1.612	0.0468495	Up	DDT
Q96HA1	428	K	0.493	0.00840979	Down	POM121
Q96HA1	507	K	0.556	0.00545302	Down	POM121
E9PRG8	109	K	0.409	5.98292e-05	Down	C11orf98
O00151	246	K	0.624	0.0262339	Down	PDLIM1
O00151	103	K	0.474	0.000661715	Down	PDLIM1
O00193	13	K	0.574	0.00782471	Down	SMAP
O00232	221	K	2.089	0.036379	Up	PSMD12
O00267	143	K	0.545	0.0126844	Down	SUPT5H
O00268	817	K	0.623	0.022835	Down	TAF4
O00541	98	K	0.412	0.00026957	Down	PES1
O00541	441	K	0.432	0.000335454	Down	PES1
O00541	517	K	0.408	0.00020797	Down	PES1
O00566	157	K	0.535	0.0132706	Down	MPHOSPH10
O00566	649	K	0.568	0.0378996	Down	MPHOSPH10
O00567	589	K	0.418	0.00673244	Down	NOP56
O00567	564	K	0.525	0.0260795	Down	NOP56
O00567	540	K	0.573	0.038134	Down	NOP56
O14497	1615	K	0.274	0.0121635	Down	ARID1A
O14497	1612	K	0.551	0.00270842	Down	ARID1A
O14646	401	K	0.562	0.00853105	Down	CHD1
P49792	1886	K	1.878	0.0458108	Up	RANBP2
P49792	1963	K	0.509	0.0134018	Down	RANBP2
O14737	110	K	0.578	1.64489e-05	Down	PDCD5
O14908	10	K	0.519	0.00412066	Down	GIPC1
O14929	15	K	0.527	0.0170842	Down	HAT1
O14974	442	K	0.562	0.013224	Down	PPP1R12A
O14974	532	K	0.491	0.00687141	Down	PPP1R12A
O14981	248	K	0.445	0.000733514	Down	BTAF1
O15014	1310	K	0.572	0.0012913	Down	ZNF609
O15014	441	K	0.517	0.0259338	Down	ZNF609
O15042	88	K	0.571	0.00269199	Down	U2SURP
O15042	829	K	0.637	0.00359938	Down	U2SURP
O15042	832	K	0.557	0.000507061	Down	U2SURP
O15042	168	K	0.64	0.0192403	Down	U2SURP
O15042	188	K	0.664	0.0141734	Down	U2SURP
O15042	156	K	0.514	0.000121126	Down	U2SURP
O15042	749	K	0.558	0.0172246	Down	U2SURP
O15042	755	K	0.541	0.000649531	Down	U2SURP
O15042	201	K	0.47	0.00109438	Down	U2SURP
O15042	392	K	0.597	0.0157497	Down	U2SURP
O15042	80	K	0.643	0.0039514	Down	U2SURP
O15042	865	K	0.648	0.00457284	Down	U2SURP
O15156	212	K	0.388	0.000195859	Down	ZBTB7B
O15156	206	K	0.372	6.04707e-05	Down	ZBTB7B
O15226	234	K	0.434	0.000715835	Down	NKRF
O15226	561	K	0.435	0.00126749	Down	NKRF
O15355	172	K	0.416	0.000495661	Down	PPM1G
O15355	519	K	0.636	0.0309061	Down	PPM1G
O15381	156	K	0.524	0.00362721	Down	NVL
O15382	377	K	1.701	0.0204166	Up	BCAT2
O43148	128	K	0.517	0.00171621	Down	RNMT
O43148	83	K	0.66	0.0155668	Down	RNMT
O43159	90	K	0.447	0.007127	Down	RRP8
O43159	78	K	0.332	0.000500635	Down	RRP8
O43172	53	K	0.576	0.0389118	Down	PRPF4
O43172	45	K	0.408	0.00311577	Down	PRPF4
O43252	12	K	0.481	0.00374969	Down	PAPSS1
O43290	302	K	0.514	0.00128367	Down	SART1
O43290	666	K	0.515	0.00924437	Down	SART1
O43290	657	K	0.593	0.00703443	Down	SART1
O43290	183	K	0.481	0.000285029	Down	SART1
O43290	336	K	0.483	0.0149027	Down	SART1
O43390	584	K	0.643	0.00132335	Down	HNRNPR
O43390	103	K	1.678	0.0441264	Up	HNRNPR
O43395	103	K	0.627	0.0225935	Down	PRPF3
O43660	180	K	0.545	0.0121033	Down	PLRG1
O43665	12	K	0.62	0.00865997	Down	RGS10
O43670	100	K	0.551	0.0114775	Down	ZNF207
O43719	221	K	0.57	0.000203922	Down	HTATSF1
O43719	410	K	0.554	0.0206259	Down	HTATSF1
O43719	119	K	0.46	0.000103324	Down	HTATSF1
O43719	509	K	0.425	0.00169852	Down	HTATSF1
O43809	23	K	0.617	0.00853354	Down	NUDT21
O43813	128	K	0.57	0.00598301	Down	LANCL1
O43818	84	K	0.572	0.0197274	Down	RRP9
O43823	306	K	0.358	0.0197523	Down	AKAP8
O60231	93	K	0.536	0.000322334	Down	DHX16
O60231	340	K	0.503	0.00603538	Down	DHX16
O60231	213	K	0.477	0.00588039	Down	DHX16
O60231	302	K	0.46	0.00127942	Down	DHX16
O60244	615	K	0.39	0.0359498	Down	MED14
O60264	739	K	0.448	0.0173203	Down	SMARCA5
O60264	1036	K	0.453	0.00571378	Down	SMARCA5
O60293	687	K	0.45	0.00114302	Down	ZFC3H1
O60502	597	K	0.59	0.00581783	Down	OGA
O60563	590	K	0.57	0.0155076	Down	CCNT1
O60563	540	K	0.62	0.00409888	Down	CCNT1
O60684	18	K	0.536	0.00515626	Down	KPNA6
O60716	146	K	0.499	0.00245043	Down	CTNND1
O60828	189	K	0.454	0.000602696	Down	PQBP1
O60828	223	K	0.524	0.00899159	Down	PQBP1
O60828	197	K	0.35	0.00942408	Down	PQBP1
O60832	443	K	0.635	0.00351124	Down	DKC1
O60869	50	K	0.661	0.0101727	Down	EDF1
O60870	209	K	0.5	0.0209504	Down	KIN
O60885	1050	K	0.57	0.0140965	Down	BRD4
O60885	694	K	0.476	0.0288186	Down	BRD4
O60942	591	K	0.525	0.000499711	Down	RNGTT
O75182	395	K	0.539	0.00139532	Down	SIN3B
O75319	313	K	0.475	0.0479632	Down	DUSP11
O75362	348	K	0.492	0.00436788	Down	ZNF217
O75362	366	K	0.387	0.00749391	Down	ZNF217
O75391	166	K	0.566	0.000209013	Down	SPAG7
O75391	173	K	0.594	0.000822228	Down	SPAG7
O75391	177	K	0.577	0.0301245	Down	SPAG7
O75521	359	K	1.747	0.00181545	Up	ECI2
O75530	19	K	0.376	0.00125773	Down	EED
O75533	252	K	0.596	0.0082309	Down	SF3B1
O75533	333	K	0.565	0.000788457	Down	SF3B1
O75533	120	K	0.609	0.00612427	Down	SF3B1
O75533	6	K	0.609	0.0346339	Down	SF3B1
O75533	214	K	0.571	0.00480044	Down	SF3B1
O75533	146	K	0.611	0.00112809	Down	SF3B1
O75533	195	K	0.516	0.0132032	Down	SF3B1
O75534	758	K	0.652	0.00350873	Down	CSDE1
O75534	277	K	0.48	0.0381529	Down	CSDE1
O75554	290	K	0.592	0.0188588	Down	WBP4
O75554	274	K	0.555	0.00290033	Down	WBP4
O75643	83	K	0.457	0.00243505	Down	SNRNP200
O75674	5	K	0.537	0.00109185	Down	TOM1L1
O75691	2510	K	0.474	6.47555e-05	Down	UTP20
O75717	981	K	0.553	0.00360436	Down	WDHD1
O75717	941	K	0.635	0.0490868	Down	WDHD1
O75821	209	K	0.514	0.00406682	Down	EIF3G
O75822	122	K	0.509	0.00187831	Down	EIF3J
O75915	151	K	0.387	0.0151766	Down	ARL6IP5
O75934	177	K	0.589	0.00733943	Down	BCAS2
O75937	210	K	0.486	0.000117927	Down	DNAJC8
O75937	246	K	0.554	0.00101271	Down	DNAJC8
O75940	229	K	0.409	0.0024664	Down	SMNDC1
O75947	149	K	4.883	0.0343216	Up	ATP5PD
O76021	373	K	0.473	0.00477057	Down	RSL1D1
O76021	331	K	0.488	0.0297193	Down	RSL1D1
O76021	468	K	0.555	0.000859466	Down	RSL1D1
O76021	408	K	0.402	0.000296004	Down	RSL1D1
O76021	461	K	0.585	0.000635327	Down	RSL1D1
O76021	311	K	0.421	0.00141786	Down	RSL1D1
O94776	559	K	0.609	0.00933531	Down	MTA2
O94776	539	K	0.538	0.0167784	Down	MTA2
O94776	460	K	2.328	0.000316071	Up	MTA2
O94906	178	K	0.349	0.00828199	Down	PRPF6
O94913	592	K	0.485	0.00101695	Down	PCF11
O95782	6	K	0.659	0.00116187	Down	AP2A1
O94992	227	K	0.481	0.00461179	Down	HEXIM1
O95218	137	K	0.544	0.00295547	Down	ZRANB2
O95218	46	K	0.647	7.70001e-05	Down	ZRANB2
O95218	92	K	0.504	0.00198585	Down	ZRANB2
O95218	95	K	0.642	0.0030761	Down	ZRANB2
O95251	263	K	0.609	0.00839435	Down	KAT7
O95391	199	K	0.639	0.000530293	Down	SLU7
O95391	527	K	0.448	0.000632472	Down	SLU7
O95391	355	K	0.611	0.0126665	Down	SLU7
O95400	26	K	0.513	0.000317293	Down	CD2BP2
O95453	616	K	0.319	7.08714e-05	Down	PARN
O95453	525	K	0.455	0.00111362	Down	PARN
O95453	566	K	0.468	0.00126344	Down	PARN
O95602	1360	K	0.363	0.00543362	Down	POLR1A
O95816	5	K	0.642	0.00875322	Down	BAG2
O95983	41	K	0.572	0.0119022	Down	MBD3
O95983	73	K	0.447	0.00113267	Down	MBD3
P00367	480	K	2.066	0.00734975	Up	GLUD1
P02545	78	K	5.818	0.0327122	Up	LMNA
P02545	457	K	1.519	0.0286244	Up	LMNA
P02545	470	K	2.31	0.00310027	Up	LMNA
P03928	45	K	1.729	0.00714461	Up	MT-ATP8
P04083	90	K	1.559	0.0255355	Up	ANXA1
P04114	1121	K	1.882	0.0279777	Up	APOB
P04179	130	K	1.859	0.03094	Up	SOD2
P05141	268	K	1.556	0.00728327	Up	SLC25A5
P05198	61	K	0.506	0.00110307	Down	EIF2S1
P05455	360	K	0.52	0.000901277	Down	SSB
P05455	328	K	0.569	0.00294007	Down	SSB
P06400	873	K	0.419	0.000267983	Down	RB1
P06400	791	K	0.594	0.047645	Down	RB1
P06454	103	K	0.548	0.0249816	Down	PTMA
P06733	193	K	1.61	0.0334954	Up	ENO1
P06746	48	K	0.492	0.00238767	Down	POLB
P07910	223	K	0.606	0.00789433	Down	HNRNPC
P07910	170	K	0.482	0.0324183	Down	HNRNPC
P07910	176	K	0.605	0.00262248	Down	HNRNPC
P07919	42	K	1.586	0.00598107	Up	UQCRH
P08195	615	K	2.038	0.00828461	Up	SLC3A2
P08579	111	K	0.635	0.0164942	Down	SNRPB2
P08651	280	K	0.594	0.0435589	Down	NFIC
P09429	128	K	1.538	0.0237476	Up	HMGB1
P09455	32	K	0.606	0.00152131	Down	RBP1
P09651	3	K	0.518	0.00507014	Down	HNRNPA1
P09661	179	K	0.618	0.000967572	Down	SNRPA1
P10768	200	K	1.509	0.0255956	Up	ESD
P10809	249	K	1.907	0.021438	Up	HSPD1
P10809	301	K	2.181	0.0308121	Up	HSPD1
P11387	202	K	0.439	0.014596	Down	TOP1
P11387	164	K	0.579	0.0168877	Down	TOP1
P11388	1484	K	0.459	0.000444932	Down	TOP2A
P11388	1276	K	0.415	0.000656249	Down	TOP2A
P12236	147	K	1.916	0.00125386	Up	SLC25A6
P12236	105	K	2.273	0.0272238	Up	SLC25A6
P12270	1648	K	0.637	0.000835008	Down	TPR
P12270	1690	K	0.592	8.20902e-05	Down	TPR
P12956	553	K	0.373	0.0176788	Down	XRCC6
P12956	556	K	0.647	0.00256044	Down	XRCC6
P13667	543	K	1.827	0.0133726	Up	PDIA4
P14866	62	K	0.591	0.00526748	Down	HNRNPL
P14866	34	K	0.623	0.0160939	Down	HNRNPL
P16220	122	K	0.522	0.00375362	Down	CREB1
P16422	160	K	1.859	0.0137594	Up	EPCAM
P16949	128	K	0.546	0.00194087	Down	STMN1
P16949	41	K	0.615	0.00465786	Down	STMN1
P16949	70	K	0.565	0.00453447	Down	STMN1
P17096	31	K	0.412	0.00614422	Down	HMGA1
P17480	284	K	0.648	0.0116639	Down	UBTF
P17480	384	K	0.622	0.00495142	Down	UBTF
P17480	216	K	0.431	0.00219841	Down	UBTF
P17706	364	K	0.483	0.000931038	Down	PTPN2
P17844	33	K	0.509	0.000122111	Down	DDX5
P17844	40	K	0.568	0.0246267	Down	DDX5
P17844	523	K	0.516	0.000165392	Down	DDX5
P17844	45	K	0.388	8.17988e-05	Down	DDX5
P17844	207	K	0.594	0.0399754	Down	DDX5
P17980	56	K	0.605	0.000108185	Down	PSMC3
P18583	2166	K	0.501	0.000416327	Down	SON
P18583	277	K	0.571	0.00187615	Down	SON
P18858	12	K	0.573	0.00586729	Down	LIG1
P18887	247	K	0.544	0.00232674	Down	XRCC1
P18887	169	K	0.533	0.00335013	Down	XRCC1
P19338	102	K	0.493	0.000406271	Down	NCL
P19338	109	K	0.641	0.0187087	Down	NCL
P19338	116	K	0.634	0.00283685	Down	NCL
P19338	132	K	0.588	0.0129879	Down	NCL
P19338	477	K	0.522	0.0147745	Down	NCL
P19338	16	K	0.666	0.0198205	Down	NCL
P19338	572	K	0.6	0.0137637	Down	NCL
P19447	222	K	0.552	0.00620706	Down	ERCC3
P20042	87	K	0.423	0.0135079	Down	EIF2S2
P20810	132	K	0.432	0.00157525	Down	CAST
P20810	43	K	0.652	0.00178863	Down	CAST
P21291	112	K	0.664	0.0121472	Down	CSRP1
P21291	108	K	0.657	0.0261989	Down	CSRP1
P21926	126	K	2.006	0.0169913	Up	CD9
P21926	170	K	2.316	0.00277328	Up	CD9
P22087	318	K	0.581	0.00440606	Down	FBL
P23193	252	K	0.508	0.00260504	Down	TCEA1
P23246	211	K	0.657	0.0110809	Down	SFPQ
P23396	10	K	0.548	0.00350982	Down	RPS3
P23497	306	K	0.434	0.000491715	Down	SP100
P23588	486	K	0.492	8.87332e-05	Down	EIF4B
P23588	333	K	0.37	0.00277476	Down	EIF4B
P24928	1866	K	0.523	0.0314428	Down	POLR2A
P24941	9	K	2.626	0.00102473	Up	CDK2
P25205	556	K	0.518	0.0496959	Down	MCM3
P25205	152	K	0.565	1.6394e-05	Down	MCM3
P25440	275	K	0.622	0.0198823	Down	BRD2
P25490	203	K	0.635	0.000107153	Down	YY1
P25490	208	K	0.591	0.000356316	Down	YY1
P25685	159	K	0.605	0.00285715	Down	DNAJB1
P25705	161	K	1.846	0.00432045	Up	ATP5F1A
P25786	243	K	0.625	0.0205981	Down	PSMA1
P26006	638	K	2.671	0.000741385	Up	ITGA3
P26006	620	K	2.885	0.00303068	Up	ITGA3
P26358	1121	K	0.46	0.00210867	Down	DNMT1
P26599	137	K	0.496	0.0299196	Down	PTBP1
P27694	167	K	0.592	0.00962789	Down	RPA1
P27695	7	K	0.638	0.00197179	Down	APEX1
P27816	711	K	0.581	0.0101428	Down	MAP4
P28290	701	K	0.525	0.0139857	Down	ITPRID2
P28290	150	K	0.483	9.80047e-05	Down	ITPRID2
P28290	729	K	0.461	0.00856317	Down	ITPRID2
P29084	24	K	0.527	0.0115415	Down	GTF2E2
P29084	271	K	0.407	0.004831	Down	GTF2E2
P29590	476	K	0.416	0.00013032	Down	PML
P29590	490	K	0.318	7.07356e-05	Down	PML
P30414	328	K	0.384	0.000879303	Down	NKTR
P31943	200	K	0.556	0.000699704	Down	HNRNPH1
P31947	11	K	0.572	0.0118076	Down	SFN
P31948	207	K	0.477	0.0260351	Down	STIP1
P33176	813	K	0.623	0.0196843	Down	KIF5B
P34897	103	K	1.507	0.00234168	Up	SHMT2
P34932	560	K	0.635	0.00930178	Down	HSPA4
P35221	889	K	0.328	0.0210903	Down	CTNNA1
P35251	318	K	0.506	0.00120457	Down	RFC1
P35269	407	K	0.608	0.00192253	Down	GTF2F1
P35269	242	K	0.483	0.00385303	Down	GTF2F1
P35269	421	K	0.627	0.00138712	Down	GTF2F1
P35613	227	K	1.707	0.0238476	Up	BSG
P35613	187	K	1.658	0.0309284	Up	BSG
P35637	510	K	0.442	0.0189849	Down	FUS
P37108	43	K	0.618	0.00487807	Down	SRP14
P37235	137	K	0.43	0.0120405	Down	HPCAL1
P38432	167	K	0.376	0.0421442	Down	COIL
P38432	209	K	0.58	0.000587706	Down	COIL
P38646	135	K	1.539	0.0281397	Up	HSPA9
P39880	647	K	0.63	0.0339446	Down	CUX1
P40121	127	K	0.522	0.000147971	Down	CAPG
P40926	78	K	1.928	0.0396966	Up	MDH2
P41223	125	K	0.603	0.00962848	Down	BUD31
P41236	18	K	0.518	5.5934e-05	Down	PPP1R2
P41236	113	K	0.543	0.00596119	Down	PPP1R2
P41236	145	K	0.553	0.00408487	Down	PPP1R2
P42166	281	K	0.55	0.000918117	Down	TMPO
P42166	356	K	0.576	0.000457532	Down	TMPO
P42285	358	K	0.549	0.0101097	Down	MTREX
P42285	369	K	0.659	0.0135558	Down	MTREX
P42285	761	K	0.496	0.00303128	Down	MTREX
P42285	35	K	0.652	0.00122	Down	MTREX
P42677	5	K	0.59	0.0173032	Down	RPS27
P42696	171	K	0.3	1.87418e-05	Down	RBM34
P42704	613	K	2.173	0.0237583	Up	LRPPRC
P43243	181	K	0.575	0.000582306	Down	MATR3
P43243	716	K	0.432	0.00742956	Down	MATR3
P43243	3	K	0.623	0.000956279	Down	MATR3
P43246	546	K	0.598	0.00205403	Down	MSH2
P45985	45	K	0.539	0.011795	Down	MAP2K4
P46013	1491	K	0.6	0.00910942	Down	MKI67
P46013	379	K	0.502	0.00166414	Down	MKI67
P46013	910	K	0.432	0.00208811	Down	MKI67
P46013	993	K	0.457	0.000185628	Down	MKI67
P46013	552	K	0.398	0.00337597	Down	MKI67
P46013	1860	K	0.576	0.0124911	Down	MKI67
P46013	458	K	0.305	0.000151695	Down	MKI67
P46013	160	K	0.347	0.00927065	Down	MKI67
P46013	1004	K	0.529	0.00278127	Down	MKI67
P46013	1275	K	0.611	0.0115774	Down	MKI67
P46013	1165	K	0.528	0.0370757	Down	MKI67
P46013	263	K	0.568	0.0448052	Down	MKI67
P46013	548	K	0.457	7.09794e-06	Down	MKI67
P46013	107	K	0.556	0.0081528	Down	MKI67
P46013	1208	K	0.522	0.00758897	Down	MKI67
P46013	2300	K	0.54	0.0346302	Down	MKI67
P46013	1330	K	0.505	0.00409946	Down	MKI67
P46013	1026	K	0.644	0.00727594	Down	MKI67
P46013	886	K	0.534	0.000720298	Down	MKI67
P46013	850	K	0.498	0.000393556	Down	MKI67
P46013	3206	K	0.512	0.00274228	Down	MKI67
P46013	421	K	0.316	0.000332152	Down	MKI67
P46063	637	K	0.614	0.0469119	Down	RECQL
P46063	626	K	0.528	0.00443421	Down	RECQL
P46087	772	K	0.291	0.00153756	Down	NOP2
P46087	649	K	0.314	0.00550716	Down	NOP2
P46087	91	K	0.559	0.00152545	Down	NOP2
P46087	757	K	0.53	0.0293416	Down	NOP2
P46087	767	K	0.618	0.0399719	Down	NOP2
P46100	805	K	0.603	0.0168305	Down	ATRX
P46100	830	K	0.649	0.000760178	Down	ATRX
P46459	105	K	1.615	0.000422285	Up	NSF
P46776	94	K	0.653	0.00548709	Down	RPL27A
P46937	90	K	0.541	0.002826	Down	YAP1
P47756	95	K	4.082	0.0234684	Up	CAPZB
P48426	378	K	0.664	0.0394649	Down	PIP4K2A
P48444	256	K	0.653	0.000506483	Down	ARCN1
P48507	34	K	0.589	0.00102908	Down	GCLM
P49006	99	K	0.471	0.0302888	Down	MARCKSL1
P49336	118	K	0.552	0.00191859	Down	CDK8
P49368	15	K	0.655	0.0235937	Down	CCT3
P49585	16	K	0.405	0.00248494	Down	PCYT1A
P49750	2138	K	0.509	0.0386642	Down	YLPM1
P49750	1769	K	0.307	0.0257777	Down	YLPM1
P49750	838	K	0.499	0.000997163	Down	YLPM1
P49750	2044	K	0.532	0.01532	Down	YLPM1
P49750	808	K	0.505	0.00323996	Down	YLPM1
P49750	310	K	0.608	0.00812753	Down	YLPM1
P49756	688	K	0.499	0.00201397	Down	RBM25
P49756	711	K	0.473	0.0127143	Down	RBM25
P49790	15	K	0.509	0.000144717	Down	NUP153
P49790	705	K	0.6	0.0264675	Down	NUP153
P49959	673	K	0.498	0.0477994	Down	MRE11
P50552	240	K	0.558	0.00584267	Down	VASP
P50613	328	K	0.518	6.16441e-05	Down	CDK7
P51003	650	K	0.512	0.0335222	Down	PAPOLA
P51608	210	K	0.592	0.0191894	Down	MECP2
P51608	256	K	0.582	0.00776426	Down	MECP2
P51608	459	K	0.585	0.0299868	Down	MECP2
P51608	200	K	0.632	0.029914	Down	MECP2
P51610	345	K	0.661	0.00387539	Down	HCFC1
P51858	106	K	0.579	0.00814974	Down	HDGF
P51991	134	K	2.327	0.0473724	Up	HNRNPA3
P52294	46	K	0.367	0.00260009	Down	KPNA1
P52294	17	K	0.475	0.00124479	Down	KPNA1
P52597	224	K	0.575	0.0152967	Down	HNRNPF
P52701	324	K	0.419	0.000375138	Down	MSH6
P52756	318	K	0.642	0.00333641	Down	RBM5
P52756	724	K	0.592	0.019469	Down	RBM5
P52756	181	K	0.45	0.0165381	Down	RBM5
P52756	542	K	0.449	0.000409593	Down	RBM5
P52815	150	K	2.068	0.0456964	Up	MRPL12
P52907	268	K	0.658	0.00861168	Down	CAPZA1
P52948	1040	K	0.541	0.00412411	Down	NUP98
P52948	1019	K	0.578	0.00436303	Down	NUP98
P52948	563	K	0.483	0.0107323	Down	NUP98
P53602	207	K	0.502	0.0100291	Down	MVD
P53814	668	K	0.371	0.00722236	Down	SMTN
P53814	336	K	0.392	0.00489092	Down	SMTN
P53999	38	K	0.52	0.0304948	Down	SUB1
P54577	356	K	0.628	0.0137524	Down	YARS1
P55081	340	K	0.474	0.00197397	Down	MFAP1
P55081	329	K	0.59	0.000253146	Down	MFAP1
P55081	381	K	0.647	0.0019039	Down	MFAP1
P55081	242	K	0.505	0.000483062	Down	MFAP1
P55199	129	K	0.416	0.000843263	Down	ELL
P55265	715	K	0.576	0.0475587	Down	ADAR
P55265	637	K	0.344	0.000509755	Down	ADAR
P55265	326	K	0.431	0.00645637	Down	ADAR
P55265	1115	K	0.558	0.00291448	Down	ADAR
P55265	936	K	0.577	0.0310988	Down	ADAR
P55884	729	K	0.516	0.000269241	Down	EIF3B
P56545	6	K	0.638	0.00396883	Down	CTBP2
P57081	402	K	0.508	0.00597902	Down	WDR4
P61081	8	K	0.511	0.00151975	Down	UBE2M
P61978	34	K	0.463	0.000301135	Down	HNRNPK
P62140	303	K	0.581	0.00223955	Down	PPP1CB
P62241	128	K	1.555	0.0160867	Up	RPS8
P62263	63	K	0.419	0.00975681	Down	RPS14
P62266	29	K	0.558	0.000846905	Down	RPS23
P62277	9	K	0.528	0.0483847	Down	RPS13
P62280	38	K	0.613	0.00307307	Down	RPS11
P62495	178	K	0.462	0.00453443	Down	ETF1
P63208	155	K	0.653	0.0177009	Down	SKP1
P78316	235	K	0.591	0.00294725	Down	NOP14
P78316	809	K	0.439	0.000228797	Down	NOP14
P78318	295	K	0.495	0.0143404	Down	IGBP1
P78332	1066	K	0.426	0.000830859	Down	RBM6
P78332	331	K	0.427	0.00788544	Down	RBM6
P78344	31	K	0.415	0.00064286	Down	EIF4G2
P78344	484	K	0.493	0.0165389	Down	EIF4G2
P78344	49	K	0.613	0.0011951	Down	EIF4G2
P78345	263	K	0.564	0.00322439	Down	RPP38
P78347	130	K	0.513	0.00242355	Down	GTF2I
P78347	192	K	0.548	0.000220883	Down	GTF2I
P78371	250	K	0.664	0.00123712	Down	CCT2
P78527	2694	K	0.564	0.000994724	Down	PRKDC
P82979	10	K	0.43	0.0479437	Down	SARNP
P82979	12	K	0.664	0.00508854	Down	SARNP
P83731	147	K	0.53	0.00122302	Down	RPL24
P83731	141	K	0.605	0.00372728	Down	RPL24
P83916	104	K	0.613	0.0217593	Down	CBX1
P98175	920	K	0.545	0.0010804	Down	RBM10
P98175	881	K	0.563	0.0433503	Down	RBM10
P98175	653	K	0.574	0.00291509	Down	RBM10
Q00403	100	K	0.602	0.0231846	Down	GTF2B
Q00839	12	K	0.629	0.00634073	Down	HNRNPU
Q00839	670	K	1.576	0.00708885	Up	HNRNPU
Q01105	189	K	0.538	0.0261474	Down	SET
Q01469	34	K	0.618	0.000769244	Down	FABP5
Q01780	844	K	0.507	0.000483318	Down	EXOSC10
Q01813	736	K	1.731	0.0171259	Up	PFKP
Q01831	374	K	0.531	4.02811e-05	Down	XPC
Q01831	50	K	0.541	0.00248722	Down	XPC
Q02878	5	K	1.539	0.0156184	Up	RPL6
Q02880	1227	K	0.366	0.0226931	Down	TOP2B
Q02952	518	K	0.633	0.00522668	Down	AKAP12
Q02952	526	K	0.579	0.00041097	Down	AKAP12
Q02952	177	K	0.6	0.00320005	Down	AKAP12
Q02952	517	K	0.472	0.0113286	Down	AKAP12
Q03701	13	K	0.354	6.78055e-06	Down	CEBPZ
Q03701	787	K	0.257	5.89675e-06	Down	CEBPZ
Q03701	228	K	0.328	3.44355e-05	Down	CEBPZ
Q04637	1206	K	0.654	0.0354291	Down	EIF4G1
Q04637	1071	K	0.561	0.00225685	Down	EIF4G1
Q05639	408	K	0.654	0.015914	Down	EEF1A2
Q06830	93	K	1.827	0.0257709	Up	PRDX1
Q07157	257	K	0.537	0.000556773	Down	TJP1
Q07666	432	K	0.622	0.0003621	Down	KHDRBS1
Q07666	424	K	0.638	0.00651207	Down	KHDRBS1
Q08211	146	K	0.599	0.000243969	Down	DHX9
Q08211	1163	K	0.598	0.000256878	Down	DHX9
Q09028	4	K	2.508	0.0305697	Up	RBBP4
Q09161	20	K	0.483	0.00377636	Down	NCBP1
Q09666	4118	K	0.595	0.0117068	Down	AHNAK
Q09666	1911	K	0.632	0.0143364	Down	AHNAK
Q09666	3532	K	0.49	0.00840098	Down	AHNAK
Q09666	4508	K	0.487	0.0274391	Down	AHNAK
Q09666	807	K	0.642	0.0100803	Down	AHNAK
Q09666	1440	K	0.56	0.0198855	Down	AHNAK
Q09666	1568	K	0.544	0.00185995	Down	AHNAK
Q09666	5772	K	0.651	0.00293441	Down	AHNAK
Q09666	5821	K	0.661	0.0152041	Down	AHNAK
Q09666	2568	K	0.467	0.0418575	Down	AHNAK
Q09666	134	K	0.309	0.0204975	Down	AHNAK
Q09666	5858	K	0.611	0.0280508	Down	AHNAK
Q09666	5716	K	0.619	0.00345709	Down	AHNAK
Q09666	1773	K	0.631	0.00237291	Down	AHNAK
Q09666	438	K	0.664	0.00153946	Down	AHNAK
Q10570	1326	K	0.55	0.00192406	Down	CPSF1
Q12789	529	K	0.525	0.000128891	Down	GTF3C1
Q12789	530	K	0.388	0.00954116	Down	GTF3C1
Q12789	517	K	0.623	0.00603795	Down	GTF3C1
Q12830	2853	K	0.568	0.00362671	Down	BPTF
Q12830	1358	K	0.502	0.00988194	Down	BPTF
Q12830	1360	K	0.335	0.00202846	Down	BPTF
Q12830	791	K	0.472	0.000393834	Down	BPTF
Q12830	786	K	0.55	0.00264261	Down	BPTF
Q12830	2736	K	0.659	0.0326815	Down	BPTF
Q12830	1335	K	0.48	0.00155151	Down	BPTF
Q12872	686	K	0.547	0.0171685	Down	SFSWAP
Q12888	1667	K	0.423	0.0154069	Down	TP53BP1
Q12888	1340	K	0.539	0.00304003	Down	TP53BP1
Q12888	1652	K	0.612	0.00775306	Down	TP53BP1
Q12888	1669	K	0.604	0.000176977	Down	TP53BP1
Q12888	1685	K	0.477	0.0179371	Down	TP53BP1
Q12888	868	K	0.492	0.000466152	Down	TP53BP1
Q12888	1332	K	0.405	0.022692	Down	TP53BP1
Q12906	342	K	0.605	0.0315363	Down	ILF3
Q13011	231	K	1.597	0.0212955	Up	ECH1
Q13111	30	K	0.515	0.00175865	Down	CHAF1A
Q13123	541	K	0.539	0.00152731	Down	IK
Q13123	534	K	0.558	0.00325935	Down	IK
Q13123	83	K	0.478	2.18721e-05	Down	IK
Q13148	263	K	0.435	0.00411608	Down	TARDBP
Q13148	84	K	0.429	0.000214422	Down	TARDBP
Q13148	181	K	0.614	0.00670959	Down	TARDBP
Q13151	159	K	0.593	0.000328443	Down	HNRNPA0
Q13151	176	K	0.497	0.000100336	Down	HNRNPA0
Q13177	52	K	0.521	0.0045531	Down	PAK2
Q13185	92	K	0.51	0.00866817	Down	CBX3
Q13206	555	K	0.479	0.0197324	Down	DDX10
Q13206	561	K	0.396	0.000207802	Down	DDX10
Q13243	25	K	0.575	4.11903e-05	Down	SRSF5
Q13330	644	K	0.52	0.00720909	Down	MTA1
Q13330	125	K	0.564	0.0170939	Down	MTA1
Q13330	527	K	1.79	0.0388472	Up	MTA1
Q13330	626	K	0.459	0.000640897	Down	MTA1
Q13330	631	K	0.422	0.0101167	Down	MTA1
Q13330	596	K	0.415	0.000487215	Down	MTA1
Q13330	582	K	0.501	0.00299809	Down	MTA1
Q13356	507	K	0.358	0.00131382	Down	PPIL2
Q13356	235	K	0.534	0.010684	Down	PPIL2
Q13416	47	K	0.642	0.000392608	Down	ORC2
Q13416	51	K	0.24	0.00957946	Down	ORC2
Q13416	108	K	0.588	0.000539669	Down	ORC2
Q13426	197	K	0.612	0.000341697	Down	XRCC4
Q13427	693	K	0.516	0.00198953	Down	PPIG
Q13427	180	K	0.442	0.000280122	Down	PPIG
Q13428	379	K	2.393	0.000592247	Up	TCOF1
Q13428	313	K	0.409	0.00107469	Down	TCOF1
Q13428	732	K	0.647	0.0156031	Down	TCOF1
Q13428	746	K	0.623	0.0416922	Down	TCOF1
Q13428	363	K	0.568	6.78304e-05	Down	TCOF1
Q13428	803	K	0.601	0.00503013	Down	TCOF1
Q13428	393	K	0.523	0.00352898	Down	TCOF1
Q13428	400	K	0.509	0.00875665	Down	TCOF1
Q13428	918	K	0.626	0.0463459	Down	TCOF1
Q13428	322	K	0.552	0.000102152	Down	TCOF1
Q13428	725	K	0.545	0.000795017	Down	TCOF1
Q13428	591	K	0.613	0.0011915	Down	TCOF1
Q13428	1034	K	0.601	0.000788119	Down	TCOF1
Q13428	642	K	0.498	0.000186597	Down	TCOF1
Q13428	64	K	0.512	0.00134661	Down	TCOF1
Q13428	74	K	0.543	0.0109972	Down	TCOF1
Q13428	668	K	0.576	0.0158448	Down	TCOF1
Q13428	1065	K	0.442	0.00343808	Down	TCOF1
Q13428	1083	K	0.593	0.000739718	Down	TCOF1
Q13428	458	K	0.496	0.000147284	Down	TCOF1
Q13428	655	K	0.507	0.000286328	Down	TCOF1
Q13428	637	K	0.556	0.000282615	Down	TCOF1
Q13428	502	K	0.632	0.0129162	Down	TCOF1
Q13428	432	K	0.6	0.0160209	Down	TCOF1
Q13428	720	K	0.614	0.000210659	Down	TCOF1
Q13428	791	K	0.497	0.0156097	Down	TCOF1
Q13435	182	K	0.502	0.00393149	Down	SF3B2
Q13435	577	K	0.58	0.0168109	Down	SF3B2
Q13435	280	K	0.663	0.000570764	Down	SF3B2
Q13442	172	K	0.633	0.00295173	Down	PDAP1
Q13442	95	K	0.557	0.00168877	Down	PDAP1
Q13442	126	K	0.478	0.000657572	Down	PDAP1
Q13451	415	K	0.503	0.00316401	Down	FKBP5
Q13523	608	K	0.605	0.0286117	Down	PRPF4B
Q13523	170	K	0.538	0.00164758	Down	PRPF4B
Q13523	551	K	0.534	0.000577163	Down	PRPF4B
Q13547	412	K	0.554	0.0010423	Down	HDAC1
Q13557	318	K	0.645	0.00559194	Down	CAMK2D
Q13557	322	K	0.576	0.000598791	Down	CAMK2D
Q13573	452	K	0.555	0.0157477	Down	SNW1
Q13573	476	K	0.553	0.00176896	Down	SNW1
Q13573	441	K	0.477	0.00548908	Down	SNW1
Q13573	81	K	0.504	0.0126906	Down	SNW1
Q13573	153	K	0.657	0.000494001	Down	SNW1
Q13573	115	K	0.594	0.0127861	Down	SNW1
Q13595	198	K	0.661	0.000595783	Down	TRA2A
Q13601	11	K	0.494	8.51002e-05	Down	KRR1
Q13601	290	K	0.459	0.00310196	Down	KRR1
Q13619	46	K	0.483	0.00372731	Down	CUL4A
Q13620	200	K	0.448	0.00323284	Down	CUL4B
Q13823	16	K	0.467	0.000169709	Down	GNL2
Q13823	609	K	0.391	0.000667658	Down	GNL2
Q13951	177	K	0.4	0.000405192	Down	CBFB
Q14004	1029	K	0.526	0.0214853	Down	CDK13
Q14103	197	K	2.146	0.0170962	Up	HNRNPD
Q14137	96	K	0.369	0.0261653	Down	BOP1
Q14137	19	K	0.422	0.00035329	Down	BOP1
Q14149	555	K	0.567	0.00143557	Down	MORC3
Q14152	1317	K	1.575	0.0253347	Up	EIF3A
Q14152	632	K	0.571	0.0127636	Down	EIF3A
Q14152	308	K	0.385	0.000874162	Down	EIF3A
Q14152	1174	K	0.619	0.0334211	Down	EIF3A
Q14157	420	K	0.425	0.0160728	Down	UBAP2L
Q14191	14	K	0.318	0.00660287	Down	WRN
Q14241	409	K	0.524	0.0111755	Down	ELOA
Q14247	87	K	3.03	0.00814138	Up	CTTN
Q14247	193	K	0.551	0.00192065	Down	CTTN
Q14247	124	K	1.596	0.00869235	Up	CTTN
Q14247	304	K	0.485	4.19065e-06	Down	CTTN
Q14247	110	K	0.555	0.00069058	Down	CTTN
Q14247	107	K	0.606	0.00052848	Down	CTTN
Q14247	57	K	0.541	0.0417513	Down	CTTN
Q14258	391	K	0.487	0.00971343	Down	TRIM25
Q14320	76	K	0.513	0.03751	Down	FAM50A
Q14320	19	K	0.493	0.00141001	Down	FAM50A
Q14320	100	K	0.632	0.00692441	Down	FAM50A
Q14331	236	K	0.555	0.0113755	Down	FRG1
Q14498	244	K	0.533	0.000412427	Down	RBM39
Q14498	21	K	0.369	0.00633806	Down	RBM39
Q14498	111	K	0.494	0.000463813	Down	RBM39
Q14498	103	K	0.441	0.0197327	Down	RBM39
Q14669	1001	K	0.644	0.0045116	Down	TRIP12
Q14676	472	K	0.479	0.038884	Down	MDC1
Q14677	158	K	0.513	0.013028	Down	CLINT1
Q14684	660	K	0.272	0.00965853	Down	RRP1B
Q14684	676	K	0.342	0.000186042	Down	RRP1B
Q14684	574	K	0.327	0.000723168	Down	RRP1B
Q14684	406	K	0.441	0.00039902	Down	RRP1B
Q14684	314	K	0.444	0.000219379	Down	RRP1B
Q14684	701	K	0.625	0.00801831	Down	RRP1B
Q14684	683	K	0.476	8.32655e-05	Down	RRP1B
Q14684	741	K	0.599	0.00272563	Down	RRP1B
Q14692	1172	K	0.524	0.00157069	Down	BMS1
Q14692	857	K	0.354	0.00105603	Down	BMS1
Q14692	674	K	0.444	0.000688151	Down	BMS1
Q14692	565	K	0.462	0.00207679	Down	BMS1
Q14694	664	K	0.544	0.00257672	Down	USP10
Q14738	73	K	0.593	0.000681827	Down	PPP2R5D
Q14738	572	K	0.644	0.0119799	Down	PPP2R5D
Q14738	583	K	2.662	0.000268712	Up	PPP2R5D
Q14739	594	K	1.536	0.00175245	Up	LBR
Q14739	176	K	0.58	0.00611781	Down	LBR
Q14807	559	K	0.48	0.0264005	Down	KIF22
Q14839	297	K	0.562	0.000210551	Down	CHD4
Q14839	304	K	0.64	0.00812584	Down	CHD4
Q14839	696	K	0.526	0.0143277	Down	CHD4
Q14839	1341	K	0.314	0.0189068	Down	CHD4
Q14847	121	K	0.561	0.00377785	Down	LASP1
Q14847	75	K	0.62	0.00302829	Down	LASP1
Q14919	19	K	0.662	0.00197751	Down	DRAP1
Q14966	395	K	0.441	0.00269684	Down	ZNF638
Q14966	1360	K	0.396	0.00349918	Down	ZNF638
Q14966	1860	K	0.499	0.00881773	Down	ZNF638
Q14966	1477	K	0.623	0.00318189	Down	ZNF638
Q14966	1480	K	0.503	0.00142877	Down	ZNF638
Q14966	371	K	0.45	0.0113935	Down	ZNF638
Q14966	853	K	0.286	0.00947279	Down	ZNF638
Q14966	1395	K	0.592	0.0307502	Down	ZNF638
Q14966	1419	K	0.517	0.00174605	Down	ZNF638
Q14966	1455	K	0.317	0.0263418	Down	ZNF638
Q14966	642	K	0.423	0.000450075	Down	ZNF638
Q14966	825	K	0.577	0.00377496	Down	ZNF638
Q14966	1415	K	0.462	0.0116689	Down	ZNF638
Q14966	1516	K	0.453	0.0104414	Down	ZNF638
Q14966	1345	K	0.431	0.0170176	Down	ZNF638
Q14978	579	K	0.504	0.00130623	Down	NOLC1
Q14978	663	K	0.426	0.00056571	Down	NOLC1
Q14978	197	K	0.521	0.0426384	Down	NOLC1
Q14978	452	K	0.561	0.0242427	Down	NOLC1
Q14978	347	K	0.449	0.000394452	Down	NOLC1
Q14978	604	K	0.463	0.000224793	Down	NOLC1
Q14978	613	K	0.457	0.000690424	Down	NOLC1
Q14978	193	K	0.503	0.000587665	Down	NOLC1
Q14978	572	K	0.524	0.0406913	Down	NOLC1
Q14978	505	K	0.539	0.0254626	Down	NOLC1
Q14978	67	K	0.416	0.00118129	Down	NOLC1
Q14978	76	K	0.395	0.000621985	Down	NOLC1
Q14978	440	K	0.513	0.0195165	Down	NOLC1
Q14978	301	K	0.397	0.00338384	Down	NOLC1
Q14978	251	K	0.54	0.00595729	Down	NOLC1
Q14978	302	K	0.498	0.00217102	Down	NOLC1
Q14978	448	K	0.416	0.00445482	Down	NOLC1
Q14978	186	K	0.49	0.000369688	Down	NOLC1
Q14978	396	K	0.461	0.00127296	Down	NOLC1
Q14978	407	K	0.476	0.0384288	Down	NOLC1
Q14978	415	K	0.544	0.000656337	Down	NOLC1
Q14978	593	K	0.409	0.0391698	Down	NOLC1
Q14978	647	K	0.51	0.00127468	Down	NOLC1
Q14980	1708	K	0.538	0.00231989	Down	NUMA1
Q14980	2005	K	0.659	0.0144058	Down	NUMA1
Q14980	1573	K	0.545	0.00284292	Down	NUMA1
Q14980	1935	K	0.432	0.000831326	Down	NUMA1
Q14980	2004	K	0.569	0.00277387	Down	NUMA1
Q14C86	988	K	0.47	0.0364654	Down	GAPVD1
Q15022	732	K	0.553	0.00111155	Down	SUZ12
Q15050	198	K	0.411	0.00300844	Down	RRS1
Q15050	226	K	0.54	0.000223591	Down	RRS1
Q15050	253	K	0.469	0.00120069	Down	RRS1
Q15050	352	K	0.541	0.00677624	Down	RRS1
Q15050	266	K	0.25	0.0292196	Down	RRS1
Q15056	123	K	0.603	0.000649264	Down	EIF4H
Q15061	430	K	0.599	0.000620482	Down	WDR43
Q15061	391	K	0.591	0.000725696	Down	WDR43
Q15149	4027	K	0.541	0.00210274	Down	PLEC
Q15233	467	K	0.629	0.000455453	Down	NONO
Q15233	243	K	0.528	3.30108e-05	Down	NONO
Q15233	5	K	0.431	0.00175654	Down	NONO
Q15233	11	K	0.658	0.0295482	Down	NONO
Q15269	596	K	0.62	0.00719164	Down	PWP2
Q15287	9	K	0.566	0.000132054	Down	RNPS1
Q15397	93	K	0.399	0.000149133	Down	PUM3
Q15397	81	K	0.458	0.00531142	Down	PUM3
Q15397	33	K	0.487	0.000110242	Down	PUM3
Q15417	156	K	0.42	0.000299519	Down	CNN3
Q15417	6	K	0.654	0.0368914	Down	CNN3
Q15417	256	K	0.438	0.00641024	Down	CNN3
Q15424	294	K	0.552	0.00292906	Down	SAFB
Q15424	578	K	0.589	0.00116738	Down	SAFB
Q15424	570	K	0.548	0.0010052	Down	SAFB
Q15424	568	K	0.511	0.000847215	Down	SAFB
Q15459	533	K	0.63	0.000793507	Down	SF3A1
Q15459	115	K	0.523	0.0484031	Down	SF3A1
Q15459	424	K	0.429	1.08909e-05	Down	SF3A1
Q15459	487	K	0.481	0.00342365	Down	SF3A1
Q15532	13	K	0.556	0.00385968	Down	SS18
Q15554	452	K	0.461	0.000897967	Down	TERF2
Q15554	375	K	0.324	0.0325391	Down	TERF2
Q15637	15	K	0.656	0.00765131	Down	SF1
Q15637	306	K	0.566	0.000685491	Down	SF1
Q15650	148	K	0.505	0.0107499	Down	TRIP4
Q15652	1486	K	0.386	0.00264033	Down	JMJD1C
Q15652	1040	K	0.648	0.0128423	Down	JMJD1C
Q15652	637	K	0.515	0.00572163	Down	JMJD1C
Q15652	676	K	0.514	0.00403147	Down	JMJD1C
Q15652	1685	K	0.496	0.00718851	Down	JMJD1C
Q15652	635	K	0.583	0.00408219	Down	JMJD1C
Q15652	1326	K	0.665	0.0138585	Down	JMJD1C
Q15652	659	K	0.458	0.00455782	Down	JMJD1C
Q15652	626	K	0.219	0.00703858	Down	JMJD1C
Q15652	1344	K	0.563	0.0100458	Down	JMJD1C
Q15652	1445	K	0.442	0.00371932	Down	JMJD1C
Q15652	2128	K	0.527	0.00733962	Down	JMJD1C
Q15652	1060	K	0.501	0.00639977	Down	JMJD1C
Q15742	376	K	0.567	0.0192337	Down	NAB2
Q15819	8	K	0.433	0.0316339	Down	UBE2V2
Q15847	70	K	0.606	9.03824e-05	Down	ADIRF
Q15942	25	K	0.616	0.0188026	Down	ZYX
Q16204	119	K	0.655	0.0395154	Down	CCDC6
Q16543	126	K	0.563	0.00260657	Down	CDC37
Q16625	379	K	0.478	0.00311625	Down	OCLN
Q16630	79	K	0.587	0.0481285	Down	CPSF6
Q16630	185	K	0.511	0.000570493	Down	CPSF6
Q16637	83	K	0.548	0.00232899	Down	SMN1
Q16881	129	K	0.418	0.000298019	Down	TXNRD1
Q1KMD3	7	K	0.665	0.00308599	Down	HNRNPUL2
Q29RF7	1211	K	0.666	0.0198377	Down	PDS5A
Q29RF7	1217	K	0.625	0.0193367	Down	PDS5A
Q29RF7	1294	K	0.643	0.000460586	Down	PDS5A
Q2TAL8	672	K	0.532	0.0169661	Down	QRICH1
Q4G0J3	250	K	0.536	0.00018629	Down	LARP7
Q4G0J3	318	K	0.5	0.00030529	Down	LARP7
Q4G0J3	205	K	0.363	0.00791744	Down	LARP7
Q4LE39	473	K	0.404	0.0429551	Down	ARID4B
Q52LW3	1049	K	0.497	0.00160251	Down	ARHGAP29
Q52LW3	1014	K	0.319	0.0127719	Down	ARHGAP29
Q53F19	487	K	0.598	0.000217678	Down	NCBP3
Q5BKZ1	264	K	0.513	0.000233234	Down	ZNF326
Q5JTH9	1268	K	0.54	0.00129894	Down	RRP12
Q5MNZ6	266	K	0.628	0.0101032	Down	WDR45B
Q5QJE6	10	K	0.566	0.000685705	Down	DNTTIP2
Q5QJE6	220	K	0.451	0.000489586	Down	DNTTIP2
Q5QJE6	316	K	0.499	0.0223842	Down	DNTTIP2
Q5QJE6	159	K	0.527	0.000549319	Down	DNTTIP2
Q5QJE6	54	K	0.63	0.047588	Down	DNTTIP2
Q5SW79	412	K	0.602	0.0317719	Down	CEP170
Q5T200	970	K	0.28	0.00200304	Down	ZC3H13
Q5T200	236	K	0.411	0.000622674	Down	ZC3H13
Q5T200	1388	K	0.423	0.000592632	Down	ZC3H13
Q5T200	1239	K	0.335	0.00306143	Down	ZC3H13
Q5T200	1167	K	0.387	0.0189432	Down	ZC3H13
Q5T3I0	28	K	0.46	0.00215244	Down	GPATCH4
Q5T3I0	108	K	0.474	0.0201632	Down	GPATCH4
Q5T8P6	219	K	0.447	0.000129429	Down	RBM26
Q5T8P6	478	K	0.436	0.0325755	Down	RBM26
Q5T8P6	505	K	0.603	0.00442123	Down	RBM26
Q5T8P6	524	K	0.53	0.000349926	Down	RBM26
Q5T8P6	504	K	0.627	0.0134951	Down	RBM26
Q5T8P6	523	K	0.452	1.79102e-05	Down	RBM26
Q5T8P6	705	K	0.38	0.000916789	Down	RBM26
Q5TGY3	1418	K	0.51	0.0074834	Down	AHDC1
Q5UIP0	1575	K	0.491	0.00321023	Down	RIF1
Q5UIP0	1721	K	0.568	0.000292422	Down	RIF1
Q5VT52	1014	K	0.525	0.00337443	Down	RPRD2
Q5VT52	183	K	0.436	0.000734143	Down	RPRD2
Q5VTL8	105	K	0.452	0.000324403	Down	PRPF38B
Q5VTR2	22	K	0.504	0.000523282	Down	RNF20
Q5VTR2	57	K	0.546	0.00408596	Down	RNF20
Q5VWG9	776	K	0.603	0.0191096	Down	TAF3
Q5VWN6	490	K	0.419	0.00972798	Down	TASOR2
Q5VWQ0	313	K	0.485	3.173e-05	Down	RSBN1
Q5VZL5	153	K	0.546	0.000557736	Down	ZMYM4
Q5VZL5	195	K	0.5	0.0016612	Down	ZMYM4
Q68CP9	1731	K	0.344	0.0284312	Down	ARID2
Q68CP9	1716	K	0.518	0.0429223	Down	ARID2
Q68CQ4	18	K	0.464	0.000311463	Down	UTP25
Q68E01	7	K	0.588	0.0363011	Down	INTS3
Q68E01	990	K	0.591	0.00623761	Down	INTS3
Q69YN4	1679	K	0.575	0.0387973	Down	VIRMA
Q6DD87	337	K	0.504	0.00491977	Down	ZNF787
Q6F5E8	1097	K	0.519	0.046207	Down	CARMIL2
Q6FI81	247	K	0.467	0.00402233	Down	CIAPIN1
Q6FI81	181	K	0.531	0.000219462	Down	CIAPIN1
Q6FI81	175	K	0.533	0.000424939	Down	CIAPIN1
Q6IN85	745	K	0.367	0.00313483	Down	PPP4R3A
Q6N043	555	K	0.507	0.0153809	Down	ZNF280D
Q6NZI2	299	K	0.387	3.38871e-05	Down	CAVIN1
Q6NZY4	693	K	0.558	0.00167615	Down	ZCCHC8
Q6P1J9	136	K	0.647	0.00292989	Down	CDC73
Q6P1R4	391	K	0.578	0.000328096	Down	DUS1L
Q6P2E9	907	K	0.579	0.0474743	Down	EDC4
Q6P2Q9	1831	K	0.493	0.000674977	Down	PRPF8
Q6P2Q9	50	K	0.564	0.00141047	Down	PRPF8
Q6P2Q9	2049	K	0.372	0.0329126	Down	PRPF8
Q6PJT7	728	K	0.46	0.000668926	Down	ZC3H14
Q6PJT7	126	K	0.352	0.00122768	Down	ZC3H14
Q6PJT7	307	K	0.451	0.000120472	Down	ZC3H14
Q6PJT7	378	K	0.482	0.036165	Down	ZC3H14
Q6PJT7	139	K	0.374	0.00855783	Down	ZC3H14
Q6PKG0	251	K	0.585	0.0187996	Down	LARP1
Q6PKG0	367	K	0.523	1.42564e-05	Down	LARP1
Q6RFH5	359	K	0.42	0.00265919	Down	WDR74
Q6UN15	294	K	0.49	8.30617e-05	Down	FIP1L1
Q6UN15	235	K	0.505	0.000194584	Down	FIP1L1
Q6UN15	135	K	0.54	0.000139258	Down	FIP1L1
Q6UX04	230	K	0.537	0.00062111	Down	CWC27
Q6Y7W6	1103	K	0.509	0.000956424	Down	GIGYF2
Q71F56	746	K	0.546	0.00871168	Down	MED13L
Q71F56	833	K	0.408	0.00583983	Down	MED13L
Q75N03	29	K	0.625	0.0251202	Down	CBLL1
Q75N03	33	K	0.479	0.0260106	Down	CBLL1
Q75N03	288	K	0.515	0.00675379	Down	CBLL1
Q75N03	74	K	0.591	0.0437886	Down	CBLL1
Q76FK4	426	K	0.329	0.0107884	Down	NOL8
Q76FK4	357	K	0.325	0.0130346	Down	NOL8
Q76FK4	284	K	0.394	0.000478381	Down	NOL8
Q76FK4	292	K	0.405	0.00194679	Down	NOL8
Q76FK4	145	K	0.382	0.000360269	Down	NOL8
Q76FK4	518	K	0.223	0.00563228	Down	NOL8
Q76FK4	1070	K	0.242	0.000313526	Down	NOL8
Q76FK4	395	K	0.465	0.0330676	Down	NOL8
Q76FK4	156	K	0.392	0.00356668	Down	NOL8
Q7L014	779	K	0.479	0.0162092	Down	DDX46
Q7L014	907	K	0.549	0.0199728	Down	DDX46
Q7L014	177	K	0.513	0.0100553	Down	DDX46
Q7L014	272	K	0.505	0.0138232	Down	DDX46
Q7L014	316	K	0.452	0.00221648	Down	DDX46
Q7L014	1025	K	0.628	0.00108738	Down	DDX46
Q7L014	263	K	0.643	0.032146	Down	DDX46
Q7L014	271	K	0.547	0.000124488	Down	DDX46
Q7L1Q6	5	K	0.606	0.00523247	Down	BZW1
Q7L4I2	367	K	0.548	0.000858574	Down	RSRC2
Q7LBC6	449	K	0.571	0.00356342	Down	KDM3B
Q7LBC6	570	K	0.605	0.0141436	Down	KDM3B
Q7LBC6	584	K	0.544	0.0121022	Down	KDM3B
Q7LBC6	876	K	0.597	0.0176522	Down	KDM3B
Q7Z2E3	175	K	0.642	0.0241703	Down	APTX
Q7Z2T5	611	K	0.483	0.0250612	Down	TRMT1L
Q7Z309	167	K	0.346	0.0256847	Down	PABIR2
Q7Z309	165	K	0.447	0.000456988	Down	PABIR2
Q7Z417	152	K	0.646	0.0052595	Down	NUFIP2
Q7Z4V5	563	K	0.654	0.0223184	Down	HDGFL2
Q7Z4V5	163	K	0.601	0.000400984	Down	HDGFL2
Q7Z5K2	408	K	0.569	0.00257543	Down	WAPL
Q7Z5K2	604	K	0.6	0.0421856	Down	WAPL
Q7Z5K2	547	K	0.559	0.000229448	Down	WAPL
Q7Z5K2	339	K	0.462	0.000522369	Down	WAPL
Q7Z5K2	541	K	0.489	0.00116438	Down	WAPL
Q7Z5L9	324	K	0.574	0.00890524	Down	IRF2BP2
Q7Z6E9	435	K	0.526	0.00139112	Down	RBBP6
Q7Z6E9	1378	K	0.511	0.000557213	Down	RBBP6
Q7Z6E9	1218	K	0.576	0.00723433	Down	RBBP6
Q7Z6E9	1183	K	0.474	0.0138844	Down	RBBP6
Q7Z6E9	1441	K	0.444	0.0254372	Down	RBBP6
Q7Z6E9	901	K	0.57	0.00186623	Down	RBBP6
Q7Z6E9	1350	K	0.502	0.000691612	Down	RBBP6
Q7Z6E9	1361	K	0.544	0.00341194	Down	RBBP6
Q7Z6E9	657	K	0.607	0.0488273	Down	RBBP6
Q7Z6E9	85	K	0.601	0.0129011	Down	RBBP6
Q86U42	207	K	0.399	6.58169e-06	Down	PABPN1
Q86U86	317	K	0.613	0.00401631	Down	PBRM1
Q86UE8	66	K	0.374	0.00867369	Down	TLK2
Q86V81	81	K	0.647	0.015471	Down	ALYREF
Q86VM9	780	K	0.315	0.00371825	Down	ZC3H18
Q86VM9	817	K	0.603	0.00705155	Down	ZC3H18
Q86VM9	823	K	0.553	0.000637413	Down	ZC3H18
Q86VM9	880	K	0.347	0.0348913	Down	ZC3H18
Q86VM9	908	K	0.477	2.03481e-05	Down	ZC3H18
Q86WX3	77	K	0.453	0.0198432	Down	RPS19BP1
Q86X29	638	K	0.404	0.0355326	Down	LSR
Q86XP3	708	K	0.484	0.0149838	Down	DDX42
Q86XP3	895	K	0.637	0.0109423	Down	DDX42
Q86XP3	650	K	0.348	0.0124959	Down	DDX42
Q86XP3	61	K	0.633	0.0123679	Down	DDX42
Q86YP4	499	K	0.464	0.0177923	Down	GATAD2A
Q86YP4	233	K	0.479	0.0190332	Down	GATAD2A
Q86YP4	584	K	0.447	0.000216566	Down	GATAD2A
Q86YP4	585	K	0.5	0.0221106	Down	GATAD2A
Q86YP4	576	K	0.539	0.00123673	Down	GATAD2A
Q8IU81	306	K	0.563	0.0117327	Down	IRF2BP1
Q8IUF8	20	K	0.486	0.00103622	Down	RIOX2
Q8IVT2	540	K	0.618	0.00783434	Down	MISP
Q8IWD4	148	K	0.414	0.00176235	Down	CCDC117
Q8IWI9	2103	K	0.539	0.00238805	Down	MGA
Q8IWI9	1502	K	0.465	1.63718e-05	Down	MGA
Q8IWI9	592	K	0.622	0.00771097	Down	MGA
Q8IWI9	2108	K	0.593	0.00324845	Down	MGA
Q8IWI9	613	K	0.351	0.0105101	Down	MGA
Q8IWS0	26	K	0.612	0.0137082	Down	PHF6
Q8IWW6	419	K	0.541	0.0342463	Down	ARHGAP12
Q8IWX8	879	K	0.554	0.000840034	Down	CHERP
Q8IWZ8	594	K	0.431	0.00336037	Down	SUGP1
Q8IWZ8	150	K	0.598	0.00228365	Down	SUGP1
Q8IX01	264	K	0.564	0.000639809	Down	SUGP2
Q8IX01	313	K	0.442	0.0292262	Down	SUGP2
Q8IXK0	702	K	0.623	0.00411252	Down	PHC2
Q8IXK0	600	K	0.594	0.00299157	Down	PHC2
Q8IXK0	598	K	0.664	0.000661011	Down	PHC2
Q8IY37	118	K	0.432	0.00135151	Down	DHX37
Q8IY37	60	K	0.464	0.000346776	Down	DHX37
Q8IY37	757	K	0.468	0.00121469	Down	DHX37
Q8IY81	384	K	0.629	0.00352707	Down	FTSJ3
Q8IY81	20	K	0.639	0.0248941	Down	FTSJ3
Q8IY81	822	K	0.583	0.00123011	Down	FTSJ3
Q8IY81	804	K	0.648	0.00127556	Down	FTSJ3
Q8IY81	235	K	0.437	0.0129677	Down	FTSJ3
Q8IY81	237	K	0.443	0.000147383	Down	FTSJ3
Q8IY81	233	K	0.557	0.00304812	Down	FTSJ3
Q8IYB3	246	K	0.53	0.0239101	Down	SRRM1
Q8IYB3	472	K	0.599	0.0071812	Down	SRRM1
Q8IYB3	459	K	0.495	0.00255568	Down	SRRM1
Q8IYB3	140	K	0.605	0.00043223	Down	SRRM1
Q8IYB3	29	K	0.595	0.00224005	Down	SRRM1
Q8IZL8	498	K	0.581	0.00789222	Down	PELP1
Q8N108	349	K	0.652	0.00822046	Down	MIER1
Q8N1G2	97	K	0.535	0.0041046	Down	CMTR1
Q8N3X1	949	K	0.543	0.00100848	Down	FNBP4
Q8N3X1	290	K	0.565	0.00125704	Down	FNBP4
Q8N3X1	942	K	0.553	0.00203339	Down	FNBP4
Q8N5A5	497	K	0.463	0.0223184	Down	ZGPAT
Q8N5C6	69	K	0.433	0.00853979	Down	SRBD1
Q8N5P1	61	K	0.507	0.0473416	Down	ZC3H8
Q8N5P1	147	K	0.53	0.00775643	Down	ZC3H8
Q8N5P1	51	K	0.468	0.00182078	Down	ZC3H8
Q8N6N3	43	K	0.495	0.00297084	Down	C1orf52
Q8N6T3	285	K	0.374	0.0142355	Down	ARFGAP1
Q8N7H5	338	K	0.526	0.0326757	Down	PAF1
Q8NAV1	7	K	0.582	0.000328296	Down	PRPF38A
Q8NC51	68	K	0.609	0.000849294	Down	SERBP1
Q8NC51	102	K	0.568	0.000847147	Down	SERBP1
Q8NC51	327	K	0.609	0.0143855	Down	SERBP1
Q8NCA5	296	K	0.533	0.0307676	Down	FAM98A
Q8ND82	174	K	0.646	0.00118401	Down	ZNF280C
Q8ND82	564	K	0.603	0.0136151	Down	ZNF280C
Q8NEY8	235	K	0.411	0.00128463	Down	PPHLN1
Q8NEY8	109	K	0.358	0.000411577	Down	PPHLN1
Q8NEY8	160	K	0.368	0.00113429	Down	PPHLN1
Q8NFC6	2880	K	0.628	0.00487811	Down	BOD1L1
Q8NFJ5	291	K	0.489	0.000742547	Down	GPRC5A
Q8NI27	1411	K	0.427	0.0238805	Down	THOC2
Q8NI27	312	K	0.44	0.00712417	Down	THOC2
Q8NI27	147	K	0.414	0.00261396	Down	THOC2
Q8NI27	1239	K	0.487	0.019279	Down	THOC2
Q8NI27	1392	K	0.489	0.0186314	Down	THOC2
Q8NI35	561	K	0.534	0.0207989	Down	PATJ
Q8NI36	431	K	0.569	0.00868117	Down	WDR36
Q92922	882	K	0.536	0.00527394	Down	SMARCC1
Q8TAQ2	326	K	0.49	0.0147022	Down	SMARCC2
Q8TAQ2	318	K	0.504	0.00389379	Down	SMARCC2
Q8TBX8	393	K	0.643	0.0115896	Down	PIP4K2C
Q8TCF1	113	K	0.654	0.0401906	Down	ZFAND1
Q8TDD1	770	K	0.54	0.00139656	Down	DDX54
Q8TDN6	17	K	0.617	0.00352941	Down	BRIX1
Q8TEQ6	815	K	0.391	0.00226669	Down	GEMIN5
Q8TEQ6	817	K	0.411	0.00757259	Down	GEMIN5
Q8TEQ6	725	K	0.453	0.000312773	Down	GEMIN5
Q8TEQ6	823	K	0.554	0.0126707	Down	GEMIN5
Q8TF01	581	K	0.552	0.0290804	Down	PNISR
Q8TF01	422	K	0.637	0.000677203	Down	PNISR
Q8WTT2	136	K	0.553	0.0197645	Down	NOC3L
Q8WTT2	326	K	0.576	0.000563664	Down	NOC3L
Q8WUA2	352	K	0.627	0.0138496	Down	PPIL4
Q8WUA2	388	K	0.473	0.00159273	Down	PPIL4
Q8WUA2	405	K	0.499	0.0279294	Down	PPIL4
Q8WUA2	460	K	0.571	0.000363566	Down	PPIL4
Q8WUA4	148	K	0.492	0.0214041	Down	GTF3C2
Q8WUB8	206	K	0.659	0.0429773	Down	PHF10
Q8WUB8	241	K	0.599	0.0330094	Down	PHF10
Q8WUF5	248	K	0.485	0.0369086	Down	PPP1R13L
Q8WUM0	135	K	0.619	0.0195744	Down	NUP133
Q8WVC0	503	K	0.64	0.00416879	Down	LEO1
Q8WVM7	1071	K	0.608	2.66129e-05	Down	STAG1
Q8WW12	32	K	0.467	0.0193418	Down	PCNP
Q8WW12	89	K	0.547	0.0138148	Down	PCNP
Q8WW12	96	K	0.392	0.0143864	Down	PCNP
Q8WW12	150	K	0.454	0.0199824	Down	PCNP
Q8WW12	70	K	0.509	0.045559	Down	PCNP
Q8WW12	167	K	0.328	0.00596125	Down	PCNP
Q8WW12	67	K	0.527	0.0351852	Down	PCNP
Q8WWM7	547	K	0.617	0.00530729	Down	ATXN2L
Q8WWQ0	773	K	0.493	0.0293397	Down	PHIP
Q8WWQ0	1533	K	0.594	0.00293326	Down	PHIP
Q8WWY3	422	K	0.571	0.00101142	Down	PRPF31
Q8WWY3	417	K	0.609	0.00316944	Down	PRPF31
Q8WXA9	453	K	0.592	0.0241411	Down	SREK1
Q8WXE1	96	K	0.591	0.00709093	Down	ATRIP
Q8WXE1	32	K	0.425	0.00172781	Down	ATRIP
Q8WXF1	8	K	0.551	0.00041304	Down	PSPC1
Q8WXF1	519	K	0.569	6.14351e-05	Down	PSPC1
Q8WXF1	14	K	0.509	0.00443618	Down	PSPC1
Q8WXI9	78	K	0.602	0.00755168	Down	GATAD2B
Q8WXI9	33	K	0.647	0.0239189	Down	GATAD2B
Q8WXI9	50	K	0.665	0.0244656	Down	GATAD2B
Q8WY91	145	K	0.389	0.00505905	Down	THAP4
Q8WYP5	1260	K	0.638	0.0493247	Down	AHCTF1
Q8WYP5	1979	K	0.611	0.00684036	Down	AHCTF1
Q8WYP5	1845	K	0.563	0.00423482	Down	AHCTF1
Q8WYP5	1341	K	0.397	0.000470432	Down	AHCTF1
Q8WYQ5	647	K	0.573	0.00950248	Down	DGCR8
Q8WYQ5	107	K	0.464	0.00195825	Down	DGCR8
Q92522	23	K	0.655	0.00893797	Down	H1-10
Q92541	504	K	0.645	0.00114787	Down	RTF1
Q92576	850	K	0.437	0.00612821	Down	PHF3
Q92576	1649	K	0.52	0.00285222	Down	PHF3
Q92610	374	K	0.332	0.000848637	Down	ZNF592
Q92610	546	K	0.516	0.02754	Down	ZNF592
Q92610	642	K	0.591	0.00605467	Down	ZNF592
Q92620	466	K	0.492	0.0188295	Down	DHX38
Q92620	512	K	0.574	0.00740136	Down	DHX38
Q92620	523	K	0.528	0.0103336	Down	DHX38
Q92733	250	K	0.548	0.00545892	Down	PRCC
Q92733	479	K	0.489	0.00400902	Down	PRCC
Q92769	481	K	0.575	0.00126445	Down	HDAC2
Q92785	196	K	0.588	0.00422395	Down	DPF2
Q92797	490	K	0.485	0.000333065	Down	SYMPK
Q92797	483	K	0.635	0.00031812	Down	SYMPK
Q92804	265	K	0.599	0.00336177	Down	TAF15
Q92841	109	K	0.526	0.000509605	Down	DDX17
Q92841	121	K	0.533	0.00687428	Down	DDX17
Q92922	354	K	0.489	0.000541522	Down	SMARCC1
Q92922	346	K	0.564	0.00538434	Down	SMARCC1
Q92922	608	K	0.523	0.0030864	Down	SMARCC1
Q92925	514	K	0.474	0.00102962	Down	SMARCD2
Q92945	205	K	0.658	0.0289222	Down	KHSRP
Q92945	71	K	0.596	6.58296e-05	Down	KHSRP
Q92979	37	K	0.649	0.0380621	Down	EMG1
Q93009	1096	K	0.584	0.000739586	Down	USP7
Q93034	10	K	0.626	0.00226366	Down	CUL5
Q96C90	59	K	0.596	0.00752737	Down	PPP1R14B
Q96B36	251	K	0.618	0.0126879	Down	AKT1S1
Q96BK5	43	K	0.442	0.00202162	Down	PINX1
Q96BK5	190	K	0.403	0.0133199	Down	PINX1
Q96BK5	149	K	0.417	0.00293093	Down	PINX1
Q96BP3	65	K	0.583	1.98669e-05	Down	PPWD1
Q96C19	233	K	0.591	0.00639936	Down	EFHD2
Q96C57	114	K	0.237	0.00162706	Down	CUSTOS
Q96C90	140	K	0.578	0.000824314	Down	PPP1R14B
Q96CB8	63	K	0.543	0.000886014	Down	INTS12
Q96CB8	341	K	0.59	0.0478568	Down	INTS12
Q96CP2	41	K	0.523	0.0105311	Down	FLYWCH2
Q96CP2	49	K	0.631	0.0024652	Down	FLYWCH2
Q96DI7	18	K	0.394	0.0127372	Down	SNRNP40
Q96DI7	8	K	0.381	0.0247452	Down	SNRNP40
Q96DI7	270	K	0.58	0.0138368	Down	SNRNP40
Q96ES7	99	K	0.248	0.0444062	Down	SGF29
Q96FK6	364	K	0.334	0.000626623	Down	WDR89
Q96GM5	223	K	0.418	0.025723	Down	SMARCD1
Q96GM8	368	K	0.514	0.0087099	Down	TOE1
Q96HC4	261	K	0.444	0.0116819	Down	PDLIM5
Q96HW7	35	K	0.547	0.00794531	Down	INTS4
Q96HW7	26	K	0.637	0.0273943	Down	INTS4
Q96I25	41	K	0.566	0.00175701	Down	RBM17
Q96I25	276	K	0.665	0.00857488	Down	RBM17
Q96I25	285	K	0.633	4.98622e-05	Down	RBM17
Q96I25	245	K	0.528	5.5221e-05	Down	RBM17
Q96I25	33	K	0.595	0.00241596	Down	RBM17
Q96I25	24	K	0.577	0.0177876	Down	RBM17
Q96I25	58	K	0.59	0.00688559	Down	RBM17
Q96I25	206	K	0.537	0.00587155	Down	RBM17
Q96I25	21	K	0.54	0.000154779	Down	RBM17
Q96I25	46	K	0.606	0.0240068	Down	RBM17
Q96JM3	621	K	0.191	0.000277248	Down	CHAMP1
Q96JM3	556	K	0.494	0.000745085	Down	CHAMP1
Q96JM3	399	K	0.474	0.00382461	Down	CHAMP1
Q96JP5	382	K	0.576	0.00181296	Down	ZFP91
Q96JP5	174	K	0.538	0.00251779	Down	ZFP91
Q96KB5	65	K	0.576	0.0108733	Down	PBK
Q96KQ7	348	K	0.565	0.00221901	Down	EHMT2
Q96KQ7	229	K	0.606	0.00288501	Down	EHMT2
Q96KR1	317	K	0.656	0.00682622	Down	ZFR
Q96KR1	509	K	0.563	0.00107148	Down	ZFR
Q96KR1	311	K	0.491	0.0012494	Down	ZFR
Q96KR1	501	K	0.332	0.000984959	Down	ZFR
Q96KR1	495	K	0.573	0.00047242	Down	ZFR
Q96LD4	636	K	0.478	0.00368438	Down	TRIM47
Q96MU7	565	K	0.435	0.0209871	Down	YTHDC1
Q96MU7	82	K	0.664	0.0336293	Down	YTHDC1
Q96MU7	96	K	0.435	0.00106738	Down	YTHDC1
Q96MX3	179	K	0.382	0.0411628	Down	ZNF48
Q96PK6	600	K	0.401	0.0101594	Down	RBM14
Q96PM9	68	K	0.535	0.000259746	Down	ZNF385A
Q96PV6	400	K	0.498	1.4354e-05	Down	LENG8
Q96PV6	235	K	0.493	0.000197327	Down	LENG8
Q96PV6	51	K	0.648	0.0141191	Down	LENG8
Q96PZ0	34	K	0.563	0.000283018	Down	PUS7
Q96QC0	262	K	0.45	0.0135731	Down	PPP1R10
Q96RE7	183	K	0.605	0.00134986	Down	NACC1
Q96RL1	607	K	0.662	0.0152422	Down	UIMC1
Q96S55	464	K	0.586	0.0307237	Down	WRNIP1
Q96S55	627	K	0.523	0.000478392	Down	WRNIP1
Q96ST3	1170	K	0.662	0.00396426	Down	SIN3A
Q96ST3	443	K	0.491	0.000169344	Down	SIN3A
Q96ST3	602	K	0.354	0.00181064	Down	SIN3A
Q96T23	381	K	0.548	0.00797341	Down	RSF1
Q96T23	1004	K	0.592	0.000482056	Down	RSF1
Q96T23	1338	K	0.35	0.00587324	Down	RSF1
Q96T37	762	K	0.616	0.00484385	Down	RBM15
Q96T37	102	K	0.623	0.00134258	Down	RBM15
Q96T37	769	K	0.47	0.0284994	Down	RBM15
Q96T58	1179	K	0.442	0.00167638	Down	SPEN
Q96T58	2094	K	0.411	0.00409289	Down	SPEN
Q96T58	931	K	0.586	0.000414373	Down	SPEN
Q96T58	3020	K	0.555	0.0331023	Down	SPEN
Q96T60	142	K	0.184	0.00311816	Down	PNKP
Q96T88	399	K	0.574	0.00577252	Down	UHRF1
Q99417	5	K	0.527	0.00268499	Down	MYCBP
Q99426	106	K	0.661	0.00157242	Down	TBCB
Q99439	19	K	0.523	0.000558999	Down	CNN2
Q99439	234	K	0.587	0.030048	Down	CNN2
Q99459	200	K	0.585	0.00132162	Down	CDC5L
Q99504	291	K	0.554	0.0102568	Down	EYA3
Q99547	150	K	0.349	0.0238806	Down	MPHOSPH6
Q99547	153	K	0.396	0.00240576	Down	MPHOSPH6
Q99547	11	K	0.634	0.00502831	Down	MPHOSPH6
Q99547	127	K	0.447	0.00064463	Down	MPHOSPH6
Q99575	398	K	0.455	0.000679513	Down	POP1
Q99575	751	K	0.596	5.31324e-06	Down	POP1
Q99590	676	K	0.494	0.0045941	Down	SCAF11
Q99590	1090	K	0.645	0.00051842	Down	SCAF11
Q99613	320	K	0.654	0.00908562	Down	EIF3C
Q99729	232	K	0.465	0.0167022	Down	HNRNPAB
Q99848	258	K	0.589	0.00148753	Down	EBNA1BP2
Q99848	204	K	0.614	0.00682301	Down	EBNA1BP2
Q99848	247	K	0.63	0.00249215	Down	EBNA1BP2
Q99848	149	K	0.655	0.00439171	Down	EBNA1BP2
Q99961	76	K	0.538	0.00400641	Down	SH3GL1
Q99961	12	K	0.57	0.00135977	Down	SH3GL1
Q9BQ39	87	K	0.553	0.00458569	Down	DDX50
Q9BQ61	158	K	0.593	0.0191054	Down	TRIR
Q9BQ61	118	K	0.656	0.0103591	Down	TRIR
Q9BQ61	161	K	0.51	0.0154902	Down	TRIR
Q9BQ75	77	K	0.497	0.00180131	Down	CMSS1
Q9BQG0	1167	K	0.468	0.00485486	Down	MYBBP1A
Q9BQG0	432	K	0.31	0.00376867	Down	MYBBP1A
Q9BRD0	104	K	0.523	0.0016472	Down	BUD13
Q9BRU9	186	K	0.392	0.0010776	Down	UTP23
Q9BRU9	209	K	0.573	0.0129148	Down	UTP23
Q9BSC4	512	K	0.568	0.0421555	Down	NOL10
Q9BSC4	616	K	0.481	0.00575274	Down	NOL10
Q9BT78	20	K	0.637	0.00218174	Down	COPS4
Q9BTA9	57	K	0.593	0.0279736	Down	WAC
Q9BTA9	183	K	0.428	0.00311301	Down	WAC
Q9BTA9	77	K	0.569	0.014944	Down	WAC
Q9BTA9	33	K	0.438	0.017308	Down	WAC
Q9BTC0	182	K	0.464	0.000930794	Down	DIDO1
Q9BTC0	596	K	0.512	0.00136961	Down	DIDO1
Q9BTC0	481	K	0.478	0.000370753	Down	DIDO1
Q9BTC0	627	K	0.506	0.0035738	Down	DIDO1
Q9BTC0	570	K	0.47	0.000563606	Down	DIDO1
Q9BTC0	383	K	0.382	0.00885295	Down	DIDO1
Q9BTC0	626	K	0.592	0.00135947	Down	DIDO1
Q9BTC8	576	K	0.459	0.02034	Down	MTA3
Q9BTE7	8	K	0.484	0.000109155	Down	DCUN1D5
Q9BTE7	23	K	0.425	4.92824e-05	Down	DCUN1D5
Q9BUH6	193	K	0.507	0.00422983	Down	PAXX
Q9BUL5	187	K	0.588	0.00569882	Down	PHF23
Q9BUL5	372	K	0.566	0.00490358	Down	PHF23
Q9BUQ8	711	K	0.649	0.00454741	Down	DDX23
Q9BVC5	201	K	0.599	0.0391629	Down	C2orf49
Q9BVI4	138	K	0.584	0.0127287	Down	NOC4L
Q9BVJ6	715	K	0.577	0.00753911	Down	UTP14A
Q9BVJ6	314	K	0.379	0.00111906	Down	UTP14A
Q9BVJ6	477	K	0.358	9.01249e-05	Down	UTP14A
Q9BVP2	46	K	0.599	0.0323039	Down	GNL3
Q9BVP2	91	K	0.381	0.00212366	Down	GNL3
Q9BW61	65	K	0.479	0.000253312	Down	DDA1
Q9BWU0	602	K	0.333	0.0178639	Down	SLC4A1AP
Q9BWU0	297	K	0.516	0.00147509	Down	SLC4A1AP
Q9BWU0	88	K	0.458	0.028044	Down	SLC4A1AP
Q9BWU0	737	K	0.565	0.00468551	Down	SLC4A1AP
Q9BXB4	208	K	0.422	0.0131969	Down	OSBPL11
Q9BXP5	285	K	0.596	0.0155946	Down	SRRT
Q9BXW9	322	K	1.876	0.0401671	Up	FANCD2
Q9BY42	10	K	0.313	0.000783978	Down	RTF2
Q9BY77	223	K	0.391	0.000441186	Down	POLDIP3
Q9BY77	248	K	0.415	0.000380291	Down	POLDIP3
Q9BY89	1178	K	0.561	0.000665421	Down	KIAA1671
Q9BYG3	246	K	0.357	0.00793784	Down	NIFK
Q9BYG3	216	K	0.387	7.88429e-05	Down	NIFK
Q9BYG3	198	K	0.536	0.0251219	Down	NIFK
Q9BYW2	1135	K	0.583	0.024884	Down	SETD2
Q9BYW2	922	K	0.489	0.0238822	Down	SETD2
Q9BYW2	382	K	0.615	0.0452646	Down	SETD2
Q9BZE4	594	K	0.608	0.00550515	Down	GTPBP4
Q9BZE9	268	K	0.62	0.0486914	Down	ASPSCR1
Q9BZJ0	823	K	0.532	0.0402576	Down	CRNKL1
Q9BZK7	102	K	2.705	0.0028959	Up	TBL1XR1
Q9BZZ5	398	K	0.59	0.00192373	Down	API5
Q9BZZ5	448	K	0.416	0.0172376	Down	API5
Q9BZZ5	454	K	0.407	0.000325093	Down	API5
Q9C005	35	K	0.592	0.034002	Down	DPY30
Q9C005	45	K	0.651	0.00875569	Down	DPY30
Q9C0J8	1023	K	0.664	0.0159325	Down	WDR33
Q9C0J8	1232	K	0.503	0.0302024	Down	WDR33
Q9GZR7	178	K	0.36	0.00296183	Down	DDX24
Q9GZR7	77	K	0.427	0.00087224	Down	DDX24
Q9GZR7	17	K	0.421	0.00275428	Down	DDX24
Q9GZS1	170	K	0.404	0.0468695	Down	POLR1E
Q9GZU8	151	K	0.475	0.000960134	Down	PSME3IP1
Q9GZU8	135	K	0.579	0.0020078	Down	PSME3IP1
Q9GZU8	146	K	0.505	0.0149418	Down	PSME3IP1
Q9GZU8	12	K	0.626	0.0307445	Down	PSME3IP1
Q9H0A0	989	K	0.568	0.0165716	Down	NAT10
Q9H0G5	281	K	0.488	0.0107085	Down	NSRP1
Q9H0G5	224	K	0.517	0.000544486	Down	NSRP1
Q9H0G5	231	K	0.52	0.0429884	Down	NSRP1
Q9H0G5	102	K	0.661	0.0212924	Down	NSRP1
Q9H0G5	15	K	0.632	0.00373833	Down	NSRP1
Q9H0G5	97	K	0.615	0.00499298	Down	NSRP1
Q9H0G5	14	K	0.633	0.000621093	Down	NSRP1
Q9H0H5	604	K	0.375	0.00424339	Down	RACGAP1
Q9H147	190	K	0.337	0.00184772	Down	DNTTIP1
Q9H147	221	K	0.54	0.0022887	Down	DNTTIP1
Q9H1A4	905	K	0.381	0.0229189	Down	ANAPC1
Q9H2G2	11	K	0.525	0.0181758	Down	SLK
Q9H2P0	1048	K	0.549	0.00036022	Down	ADNP
Q9H2P0	658	K	0.575	0.00171263	Down	ADNP
Q9H2P0	144	K	0.648	0.00764266	Down	ADNP
Q9H2P0	1035	K	0.664	0.0154802	Down	ADNP
Q9H2P0	1042	K	0.657	0.0151448	Down	ADNP
Q9H2P0	728	K	0.651	0.0335861	Down	ADNP
Q9H2P0	600	K	0.598	0.000174586	Down	ADNP
Q9H2P0	1029	K	0.615	0.00092611	Down	ADNP
Q9H2U2	81	K	0.54	0.00341585	Down	PPA2
Q9H307	157	K	0.658	0.0040335	Down	PNN
Q9H307	75	K	0.448	0.0020339	Down	PNN
Q9H3P2	429	K	0.612	0.000346248	Down	NELFA
Q9H3P2	276	K	0.498	0.0274256	Down	NELFA
Q9H444	14	K	0.666	0.00953252	Down	CHMP4B
Q9H4L4	43	K	0.585	0.0205123	Down	SENP3
Q9H4L7	84	K	0.487	0.00122106	Down	SMARCAD1
Q9H4L7	77	K	0.462	0.0153551	Down	SMARCAD1
Q9H4L7	346	K	0.507	4.97241e-05	Down	SMARCAD1
Q9H4L7	321	K	0.432	0.00773759	Down	SMARCAD1
Q9H501	48	K	0.571	0.00484594	Down	ESF1
Q9H501	55	K	0.486	8.65164e-05	Down	ESF1
Q9H501	727	K	0.439	6.97529e-05	Down	ESF1
Q9H501	736	K	0.407	0.0486686	Down	ESF1
Q9H501	170	K	0.395	0.000278861	Down	ESF1
Q9H501	197	K	0.615	0.00552853	Down	ESF1
Q9H582	720	K	0.499	0.00834176	Down	ZNF644
Q9H582	676	K	0.424	0.0014594	Down	ZNF644
Q9H583	1180	K	0.366	0.00322869	Down	HEATR1
Q9H6F5	350	K	0.628	0.025755	Down	CCDC86
Q9H6F5	281	K	0.637	0.018777	Down	CCDC86
Q9H6R4	54	K	0.626	0.00500951	Down	NOL6
Q9H7B2	275	K	0.476	3.62928e-05	Down	RPF2
Q9H7B2	252	K	0.441	0.000810363	Down	RPF2
Q9H7L9	101	K	0.512	0.0052354	Down	SUDS3
Q9H9B1	450	K	0.575	0.0206894	Down	EHMT1
Q9H9B1	568	K	0.487	0.0336987	Down	EHMT1
Q9HAN9	128	K	0.472	0.00171137	Down	NMNAT1
Q9HB07	40	K	0.502	0.0163304	Down	MYG1
Q9HB71	51	K	0.587	0.00259576	Down	CACYBP
Q9HC35	197	K	0.583	4.58447e-05	Down	EML4
Q9HC38	305	K	0.658	0.00580006	Down	GLOD4
Q9HC52	230	K	0.65	0.00308107	Down	CBX8
Q9HC52	82	K	0.533	0.0131062	Down	CBX8
Q9HCD5	140	K	0.414	0.000633867	Down	NCOA5
Q9HCG8	783	K	0.23	8.63943e-05	Down	CWC22
Q9HCG8	841	K	0.495	0.00110235	Down	CWC22
Q9HCG8	119	K	0.333	0.00964224	Down	CWC22
Q9HCG8	118	K	0.444	0.000161349	Down	CWC22
Q9HCG8	2	K	0.503	0.0107176	Down	CWC22
Q9HCS7	794	K	0.539	0.00637542	Down	XAB2
Q9NP50	72	K	0.608	0.00355919	Down	SINHCAF
Q9NP50	110	K	0.518	0.0238493	Down	SINHCAF
Q9NPD8	182	K	0.529	0.000543165	Down	UBE2T
Q9NPJ3	37	K	2.516	0.0366168	Up	ACOT13
Q9NQ29	357	K	0.486	0.00230841	Down	LUC7L
Q9NQ55	346	K	0.375	0.000920052	Down	PPAN
Q9NQ55	435	K	0.556	0.0270578	Down	PPAN
Q9NQW6	690	K	0.494	0.0460136	Down	ANLN
Q9NQW6	482	K	0.529	0.0183147	Down	ANLN
Q9NQW6	345	K	0.643	0.0138657	Down	ANLN
Q9NQZ2	417	K	0.358	0.00019315	Down	UTP3
Q9NQZ2	12	K	0.321	0.000611612	Down	UTP3
Q9NQZ2	134	K	0.461	0.00143033	Down	UTP3
Q9NQZ2	144	K	0.438	5.2227e-05	Down	UTP3
Q9NQZ2	380	K	0.412	0.0010519	Down	UTP3
Q9NR12	93	K	0.551	0.0106551	Down	PDLIM7
Q9NR30	61	K	0.489	0.000279642	Down	DDX21
Q9NR30	406	K	0.581	0.0228529	Down	DDX21
Q9NR30	116	K	0.403	5.07756e-05	Down	DDX21
Q9NR30	131	K	0.252	0.0178317	Down	DDX21
Q9NR30	54	K	0.279	0.00371889	Down	DDX21
Q9NRL2	1277	K	0.643	0.0176361	Down	BAZ1A
Q9NRY2	13	K	0.442	0.0252012	Down	INIP
Q9NRY2	53	K	0.591	0.0155384	Down	INIP
Q9NRZ9	753	K	0.369	0.00352559	Down	HELLS
Q9NSE4	241	K	2.383	0.0194205	Up	IARS2
Q9NTI5	1318	K	0.403	0.00420583	Down	PDS5B
Q9NTK5	394	K	0.654	0.0136984	Down	OLA1
Q9NTX5	13	K	0.454	0.000638013	Down	ECHDC1
Q9NV06	49	K	0.598	0.00043774	Down	DCAF13
Q9NV31	6	K	0.59	0.00486732	Down	IMP3
Q9NVM6	97	K	0.576	0.00265394	Down	DNAJC17
Q9NVR2	239	K	0.649	0.0396843	Down	INTS10
Q9NVT9	130	K	0.494	7.15488e-05	Down	ARMC1
Q9NW13	641	K	0.494	0.000146201	Down	RBM28
Q9NW13	669	K	0.384	0.0135086	Down	RBM28
Q9NW13	746	K	0.321	4.21779e-05	Down	RBM28
Q9NW64	149	K	0.661	0.0384793	Down	RBM22
Q9NWH9	884	K	0.517	0.000687441	Down	SLTM
Q9NWH9	803	K	0.602	0.00260792	Down	SLTM
Q9NWH9	966	K	0.425	0.000538862	Down	SLTM
Q9NWH9	86	K	0.474	0.0297357	Down	SLTM
Q9NWH9	578	K	0.492	0.00693822	Down	SLTM
Q9NWT1	371	K	0.554	0.0070143	Down	PAK1IP1
Q9NWT1	374	K	0.565	0.0131894	Down	PAK1IP1
Q9NX24	5	K	0.611	0.0054975	Down	NHP2
Q9NX58	207	K	0.425	0.000848477	Down	LYAR
Q9NX58	168	K	0.518	6.6048e-05	Down	LYAR
Q9NX58	288	K	0.504	3.30404e-05	Down	LYAR
Q9NX58	14	K	1.839	0.0420095	Up	LYAR
Q9NXE8	159	K	0.617	0.0210843	Down	CWC25
Q9NXE8	25	K	0.443	0.00955242	Down	CWC25
Q9NXF1	36	K	0.593	0.0304109	Down	TEX10
Q9NXG2	15	K	0.619	0.00958648	Down	THUMPD1
Q9NXG2	26	K	0.494	5.43441e-05	Down	THUMPD1
Q9NXG2	19	K	0.568	0.00152163	Down	THUMPD1
Q9NXH9	602	K	0.578	0.03818	Down	TRMT1
Q9NY27	252	K	0.595	0.0224769	Down	PPP4R2
Q9NY61	58	K	0.498	0.000248967	Down	AATF
Q9NY61	69	K	0.48	4.14529e-05	Down	AATF
Q9NY61	145	K	0.473	0.000897582	Down	AATF
Q9NYB0	384	K	0.391	0.0124057	Down	TERF2IP
Q9NYF8	778	K	0.495	0.00733567	Down	BCLAF1
Q9NYF8	842	K	0.577	0.0022797	Down	BCLAF1
Q9NYF8	457	K	0.467	3.07976e-05	Down	BCLAF1
Q9NYF8	475	K	0.504	0.000418079	Down	BCLAF1
Q9NYF8	536	K	0.423	5.46323e-05	Down	BCLAF1
Q9NYF8	548	K	0.501	1.87505e-05	Down	BCLAF1
Q9NYF8	413	K	0.448	0.000317637	Down	BCLAF1
Q9NYF8	421	K	0.502	0.000222283	Down	BCLAF1
Q9NYF8	845	K	0.59	0.0162709	Down	BCLAF1
Q9NYF8	462	K	0.463	0.00069708	Down	BCLAF1
Q9NYF8	550	K	0.432	0.000786398	Down	BCLAF1
Q9NYF8	567	K	0.59	0.00722388	Down	BCLAF1
Q9NYF8	437	K	0.55	0.00219681	Down	BCLAF1
Q9NYF8	593	K	0.508	0.00069316	Down	BCLAF1
Q9NYF8	303	K	0.481	0.00241104	Down	BCLAF1
Q9NYF8	332	K	0.537	0.000475357	Down	BCLAF1
Q9NYL9	101	K	0.48	0.000890218	Down	TMOD3
Q9NYL9	58	K	0.424	0.000310669	Down	TMOD3
Q9NYV4	493	K	0.499	0.000623818	Down	CDK12
Q9NYV4	1064	K	0.534	0.0112672	Down	CDK12
Q9NYV4	163	K	0.457	0.00292636	Down	CDK12
Q9NYV4	139	K	0.563	0.0037754	Down	CDK12
Q9NZ63	281	K	0.56	0.000552601	Down	C9orf78
Q9NZT2	460	K	0.387	0.000243386	Down	OGFR
Q9P013	40	K	0.661	0.0115612	Down	CWC15
Q9P013	28	K	0.484	0.000364087	Down	CWC15
Q9P0U4	250	K	0.63	0.0176628	Down	CXXC1
Q9P1Y6	820	K	0.516	0.0465495	Down	PHRF1
Q9P1Y6	768	K	0.646	0.00984131	Down	PHRF1
Q9P258	5	K	0.624	0.00393548	Down	RCC2
Q9P258	77	K	0.612	0.00500598	Down	RCC2
Q9P275	688	K	0.409	0.00890418	Down	USP36
Q9P2I0	459	K	0.34	0.00747747	Down	CPSF2
Q9P2N5	580	K	0.542	0.00272292	Down	RBM27
Q9P2N5	799	K	0.539	0.00548936	Down	RBM27
Q9P2T1	277	K	0.511	0.00538484	Down	GMPR2
Q9P2X3	303	K	0.526	0.0479493	Down	IMPACT
Q9UBB5	185	K	0.595	0.000885303	Down	MBD2
Q9UBB5	212	K	0.488	0.0195752	Down	MBD2
Q9UBB6	272	K	0.589	0.0405951	Down	NCDN
Q9UBB9	159	K	0.386	0.00540324	Down	TFIP11
Q9UBB9	187	K	0.511	0.000195974	Down	TFIP11
Q9UBB9	182	K	0.582	0.0432114	Down	TFIP11
Q9UBB9	741	K	0.508	0.00181744	Down	TFIP11
Q9UBB9	255	K	0.481	0.00997035	Down	TFIP11
Q9UBB9	120	K	0.498	0.0034097	Down	TFIP11
Q9UBE0	183	K	0.614	0.00121746	Down	SAE1
Q9UBE0	195	K	0.627	0.0458294	Down	SAE1
Q9UBN7	873	K	0.548	0.00160734	Down	HDAC6
Q9UBN7	51	K	0.427	0.00241358	Down	HDAC6
Q9UBP6	18	K	0.521	0.00525648	Down	METTL1
Q9UBU8	143	K	0.655	0.015597	Down	MORF4L1
Q9UER7	637	K	0.609	0.000119476	Down	DAXX
Q9UEW8	404	K	0.557	0.000195021	Down	STK39
Q9UGI8	9	K	0.46	0.000822899	Down	TES
Q9UGI8	101	K	0.488	0.0182324	Down	TES
Q9UHB6	210	K	0.649	0.00292236	Down	LIMA1
Q9UHB6	189	K	0.643	0.0150899	Down	LIMA1
Q9UHB7	297	K	0.521	0.0112535	Down	AFF4
Q9UHD8	62	K	0.438	0.0063863	Down	SEPTIN9
Q9UHD8	326	K	0.65	0.037145	Down	SEPTIN9
Q9UHI6	487	K	0.512	0.00907527	Down	DDX20
Q9UHR5	228	K	0.563	0.000456077	Down	SAP30BP
Q9UHR5	220	K	0.553	0.00473641	Down	SAP30BP
Q9UHX1	454	K	0.502	0.000261296	Down	PUF60
Q9UHX1	458	K	0.507	0.000254998	Down	PUF60
Q9UHX1	72	K	0.562	0.000193446	Down	PUF60
Q9UHX1	168	K	0.62	0.0358448	Down	PUF60
Q9UI26	337	K	0.604	0.00839137	Down	IPO11
Q9UJA5	340	K	0.528	0.00447737	Down	TRMT6
Q9UJA5	153	K	0.413	0.0134254	Down	TRMT6
Q9UJV9	49	K	0.441	0.0157383	Down	DDX41
Q9UJZ1	145	K	1.623	0.016188	Up	STOML2
Q9UK61	335	K	0.401	0.0189328	Down	TASOR
Q9UKD2	14	K	0.647	0.000940799	Down	MRTO4
Q9UKJ3	447	K	0.532	0.00442828	Down	GPATCH8
Q9UKM9	13	K	0.665	0.00997451	Down	RALY
Q9UKM9	4	K	0.632	0.0103274	Down	RALY
Q9UKM9	165	K	0.506	0.000243881	Down	RALY
Q9UKN8	740	K	0.609	0.0013263	Down	GTF3C4
Q9UKV3	238	K	0.553	0.0243744	Down	ACIN1
Q9UKV3	818	K	0.637	7.53474e-05	Down	ACIN1
Q9UKV3	548	K	0.619	0.0220715	Down	ACIN1
Q9UKV3	831	K	0.612	0.0190407	Down	ACIN1
Q9UKV3	823	K	0.543	0.000125843	Down	ACIN1
Q9UKV3	970	K	0.553	0.00049583	Down	ACIN1
Q9UKV3	860	K	0.608	0.0220964	Down	ACIN1
Q9UKX7	62	K	0.455	0.033715	Down	NUP50
Q9UKY7	76	K	0.419	0.0347254	Down	CDV3
Q9UL03	795	K	0.411	0.00478655	Down	INTS6
Q9ULR0	127	K	0.491	0.00901376	Down	ISY1
Q9ULU4	831	K	0.655	0.0161124	Down	ZMYND8
Q9ULU4	801	K	2.668	0.000488614	Up	ZMYND8
Q9ULU4	808	K	0.396	0.0179713	Down	ZMYND8
Q9ULU4	1148	K	0.518	0.00312106	Down	ZMYND8
Q9ULV4	407	K	0.561	0.00260233	Down	CORO1C
Q9ULW0	362	K	0.496	0.00785132	Down	TPX2
Q9ULW0	375	K	0.649	0.0186676	Down	TPX2
Q9ULW0	237	K	0.525	0.000256545	Down	TPX2
Q9UMY1	210	K	0.635	0.00254124	Down	NOL7
Q9UMY1	162	K	0.485	0.00423153	Down	NOL7
Q9UNS1	299	K	0.447	0.00470196	Down	TIMELESS
Q9UNX4	330	K	0.558	0.0367571	Down	WDR3
Q9UNZ2	251	K	0.547	0.0109043	Down	NSFL1C
Q9UPN9	950	K	0.516	0.000783335	Down	TRIM33
Q9UPN9	953	K	0.531	0.00291658	Down	TRIM33
Q9UPN9	769	K	0.581	0.00844058	Down	TRIM33
Q9UPT8	1193	K	0.424	0.000369934	Down	ZC3H4
Q9UQ35	51	K	0.382	0.00659109	Down	SRRM2
Q9UQ35	101	K	0.555	0.0172385	Down	SRRM2
Q9UQ35	998	K	0.549	0.000599908	Down	SRRM2
Q9UQ35	285	K	0.454	0.00280143	Down	SRRM2
Q9UQ35	920	K	0.439	0.00033664	Down	SRRM2
Q9UQE7	106	K	0.651	0.00151403	Down	SMC3
Q9UQR1	472	K	0.589	0.0172451	Down	ZNF148
Q9Y232	157	K	0.554	0.000383764	Down	CDYL
Q9Y232	162	K	0.474	0.000192356	Down	CDYL
Q9Y232	172	K	0.403	0.00192958	Down	CDYL
Q9Y232	76	K	0.652	0.0160393	Down	CDYL
Q9Y232	185	K	0.494	0.00131955	Down	CDYL
Q9Y232	191	K	0.514	0.000786233	Down	CDYL
Q9Y232	175	K	0.414	1.71015e-05	Down	CDYL
Q9Y232	195	K	0.515	0.00765755	Down	CDYL
Q9Y232	147	K	0.458	0.000299029	Down	CDYL
Q9Y277	63	K	1.644	0.0165157	Up	VDAC3
Q9Y2R4	131	K	0.558	0.00251214	Down	DDX52
Q9Y2U8	171	K	0.333	0.040834	Down	LEMD3
Q9Y2U8	300	K	0.339	0.000714407	Down	LEMD3
Q9Y2W1	709	K	0.364	0.00239715	Down	THRAP3
Q9Y2W1	711	K	0.541	0.0005673	Down	THRAP3
Q9Y2W1	551	K	0.56	0.00714785	Down	THRAP3
Q9Y2W1	558	K	0.494	0.00180294	Down	THRAP3
Q9Y2W1	876	K	0.655	0.0090774	Down	THRAP3
Q9Y2W1	346	K	0.406	0.000266905	Down	THRAP3
Q9Y2W1	375	K	0.572	0.00152276	Down	THRAP3
Q9Y2W1	705	K	0.502	0.000750433	Down	THRAP3
Q9Y2W1	215	K	0.422	0.0226711	Down	THRAP3
Q9Y2W1	451	K	0.582	0.0265741	Down	THRAP3
Q9Y2W1	455	K	0.497	0.000219004	Down	THRAP3
Q9Y2W1	461	K	0.477	0.00273212	Down	THRAP3
Q9Y2W1	519	K	0.392	0.00568109	Down	THRAP3
Q9Y2W1	389	K	0.541	0.000232356	Down	THRAP3
Q9Y2W1	697	K	0.484	0.0238065	Down	THRAP3
Q9Y2W1	442	K	0.528	0.000693633	Down	THRAP3
Q9Y2W1	421	K	0.505	0.000816758	Down	THRAP3
Q9Y2W1	427	K	0.609	0.0195047	Down	THRAP3
Q9Y2W1	486	K	0.489	0.000632192	Down	THRAP3
Q9Y2W1	879	K	0.525	0.0033763	Down	THRAP3
Q9Y2W1	420	K	0.49	0.00122198	Down	THRAP3
Q9Y2W1	396	K	0.457	0.00277619	Down	THRAP3
Q9Y2W1	470	K	0.518	0.0148671	Down	THRAP3
Q9Y2W1	527	K	0.345	0.00280769	Down	THRAP3
Q9Y2W2	614	K	0.497	0.0131719	Down	WBP11
Q9Y2W2	610	K	0.563	0.0164225	Down	WBP11
Q9Y2X0	420	K	0.509	0.0213265	Down	MED16
Q9Y2X3	411	K	0.658	0.00283223	Down	NOP58
Q9Y2X3	444	K	0.488	0.000420825	Down	NOP58
Q9Y2X3	441	K	0.604	0.000950003	Down	NOP58
Q9Y314	153	K	0.529	4.20605e-05	Down	NOSIP
Q9Y314	19	K	0.626	0.00998928	Down	NOSIP
Q9Y314	21	K	0.5	0.000165648	Down	NOSIP
Q9Y3B4	100	K	0.51	0.00130745	Down	SF3B6
Q9Y3B4	7	K	0.643	0.0366946	Down	SF3B6
Q9Y3B8	225	K	0.308	0.00161068	Down	REXO2
Q9Y3B9	200	K	0.589	0.00115416	Down	RRP15
Q9Y3B9	207	K	0.445	0.00300161	Down	RRP15
Q9Y3B9	179	K	0.498	0.0024891	Down	RRP15
Q9Y3B9	208	K	0.644	0.0222556	Down	RRP15
Q9Y3B9	114	K	0.42	0.000925868	Down	RRP15
Q9Y4B6	701	K	0.429	0.000358629	Down	DCAF1
Q9Y4B6	710	K	0.546	0.0154444	Down	DCAF1
Q9Y4B6	716	K	0.445	2.98004e-05	Down	DCAF1
Q9Y4B6	284	K	0.577	0.000896244	Down	DCAF1
Q9Y4E5	446	K	0.663	0.0345346	Down	ZNF451
Q9Y4E5	832	K	0.44	0.00354289	Down	ZNF451
Q9Y520	2255	K	0.651	0.0175763	Down	PRRC2C
Q9Y570	30	K	0.612	0.00379639	Down	PPME1
Q9Y570	6	K	0.554	0.00256877	Down	PPME1
Q9Y5B6	841	K	0.513	0.0372822	Down	PAXBP1
Q9Y5B9	1043	K	0.57	0.0350088	Down	SUPT16H
Q9Y5B9	1021	K	0.527	0.0199656	Down	SUPT16H
Q9Y5U2	123	K	0.374	0.00176483	Down	TSSC4
Q9Y5U2	318	K	0.652	0.0101292	Down	TSSC4
Q9Y618	1509	K	0.502	0.00895767	Down	NCOR2
Q9Y618	964	K	0.557	0.0206341	Down	NCOR2
Q9Y618	1265	K	0.502	0.0171064	Down	NCOR2
Q9Y618	1273	K	0.496	0.00715113	Down	NCOR2
Q9Y618	1594	K	0.384	0.0263257	Down	NCOR2
Q9Y618	1240	K	0.432	0.0145464	Down	NCOR2
Q9Y618	2086	K	0.593	0.0223526	Down	NCOR2
Q9Y618	1584	K	0.413	0.0105283	Down	NCOR2
Q9Y618	1578	K	0.468	0.00864981	Down	NCOR2
Q9Y618	2281	K	0.449	0.00560533	Down	NCOR2
Q9Y618	657	K	0.569	0.00912457	Down	NCOR2
Q9Y618	1447	K	0.637	0.0204073	Down	NCOR2
Q9Y618	670	K	0.53	0.0200357	Down	NCOR2
Q9Y618	2399	K	0.434	0.0321813	Down	NCOR2
Q9Y618	106	K	0.219	0.00528029	Down	NCOR2
Q9Y6D9	61	K	0.452	0.00421461	Down	MAD1L1
Q9Y6I4	135	K	0.617	0.009678	Down	USP3
Q9Y6X4	521	K	0.448	0.000118194	Down	FAM169A
Q9Y6X9	716	K	0.624	0.0225052	Down	MORC2

## Sheet: Kac sites
Table S4-2	List of Kac sites dynamically regulated by KAT8
Protein accession	Position	Amino acid	KD/WT Ratio	KD/WT P value	Regulated Type	Gene name
O00139	102	K	41.29	0.000801955	Up	KIF2A
O00148	35	K	1.899	0.0102245	Up	DDX39A
O00148	190	K	1.513	0.00365813	Up	DDX39A
O00193	62	K	3.329	0.000295441	Up	SMAP
O00231	32	K	2.332	0.00774356	Up	PSMD11
O14874	192	K	1.711	0.0136118	Up	BCKDK
O15042	866	K	1.99	0.00136438	Up	U2SURP
O15228	507	K	3.348	0.00220902	Up	GNPAT
O43143	17	K	2.2	0.0066223	Up	DHX15
O43169	92	K	2.78	0.0425876	Up	CYB5B
O43169	34	K	3.158	0.00194197	Up	CYB5B
O43175	58	K	1.559	0.00855622	Up	PHGDH
O43242	16	K	1.662	0.00446445	Up	PSMD3
O43242	54	K	1.741	0.00146047	Up	PSMD3
O43290	666	K	2.094	0.0192721	Up	SART1
O43390	103	K	1.508	0.0296542	Up	HNRNPR
O43399	165	K	0.601	0.00440088	Down	TPD52L2
O43665	173	K	2.269	0.0248778	Up	RGS10
O43765	95	K	1.568	0.0178552	Up	SGTA
O43823	524	K	2.161	0.0294758	Up	AKAP8
O43929	7	K	0.55	0.0089589	Down	ORC4
O60264	799	K	1.954	0.0010563	Up	SMARCA5
O60506	100	K	1.54	0.00674896	Up	SYNCRIP
O60506	256	K	1.557	0.046431	Up	SYNCRIP
O60563	471	K	1.795	0.0167624	Up	CCNT1
O60832	443	K	2.077	0.00592042	Up	DKC1
O60884	152	K	2.04	0.00166184	Up	DNAJA2
O60885	1218	K	2.675	0.00410371	Up	BRD4
O60885	1197	K	1.612	0.0444499	Up	BRD4
O60885	1208	K	1.617	0.0135221	Up	BRD4
O75131	253	K	1.923	0.0324844	Up	CPNE3
O75152	413	K	1.961	0.0147702	Up	ZC3H11A
O75306	372	K	2.018	0.0183177	Up	NDUFS2
O75390	76	K	2.363	0.00887815	Up	CS
O75390	215	K	1.741	0.0397175	Up	CS
O75400	810	K	0.348	0.00046365	Down	PRPF40A
O75400	196	K	6.785	0.00535787	Up	PRPF40A
O75475	16	K	1.9	0.0136837	Up	PSIP1
O75533	252	K	2.677	0.0209675	Up	SF3B1
O75586	227	K	1.698	0.0458582	Up	MED6
O75608	105	K	1.772	0.0311896	Up	LYPLA1
O75643	770	K	1.629	0.0113362	Up	SNRNP200
O75643	60	K	3.75	0.0094964	Up	SNRNP200
O75717	671	K	1.637	0.00740506	Up	WDHD1
O75879	181	K	2.229	0.000466242	Up	GATB
O75947	72	K	2.033	0.00175033	Up	ATP5PD
O75947	63	K	2.786	0.00183572	Up	ATP5PD
O75947	99	K	1.997	0.000850995	Up	ATP5PD
O75947	109	K	2.651	0.00246195	Up	ATP5PD
O75947	149	K	2.027	0.0189009	Up	ATP5PD
O76021	48	K	2.159	0.00116891	Up	RSL1D1
O95139	54	K	2.897	0.000139184	Up	NDUFB6
O95202	679	K	1.744	0.00540792	Up	LETM1
O95218	54	K	1.919	0.00144222	Up	ZRANB2
O95218	18	K	2.201	0.0424716	Up	ZRANB2
O95292	3	K	0.393	0.0404821	Down	VAPB
O95292	147	K	0.632	0.0178402	Down	VAPB
O95453	566	K	2.101	0.00315495	Up	PARN
O95619	131	K	3.105	0.00433411	Up	YEATS4
O95696	23	K	1.545	0.00270603	Up	BRD1
O95696	333	K	1.626	0.0406501	Up	BRD1
O95696	903	K	1.881	0.0317443	Up	BRD1
O95707	2	K	2.835	0.0479538	Up	POP4
O95782	177	K	1.918	0.0199231	Up	AP2A1
O95785	1322	K	2.781	0.00478208	Up	WIZ
O95816	5	K	1.938	0.0100653	Up	BAG2
O95816	9	K	1.938	0.0100653	Up	BAG2
O95816	200	K	2.2	0.00267778	Up	BAG2
O96019	62	K	2.675	0.0130683	Up	ACTL6A
P00367	390	K	2.101	0.0498777	Up	GLUD1
P00441	4	K	2.77	0.0307834	Up	SOD1
P00492	103	K	5.121	0.00174669	Up	HPRT1
P00505	122	K	1.901	0.0494305	Up	GOT2
P00505	404	K	2.431	0.0132498	Up	GOT2
P00505	309	K	2.55	0.0114181	Up	GOT2
P00505	296	K	1.814	0.000475802	Up	GOT2
P02545	108	K	1.517	0.0116092	Up	LMNA
P02545	470	K	1.812	0.00218377	Up	LMNA
P04040	480	K	2.594	0.0494739	Up	CAT
P04040	243	K	1.655	0.00373523	Up	CAT
P04040	506	K	1.911	0.0031141	Up	CAT
P04075	147	K	1.592	0.00184908	Up	ALDOA
P04075	42	K	2.198	8.78577e-05	Up	ALDOA
P04075	13	K	3.407	0.000488945	Up	ALDOA
P04179	130	K	2.552	0.000755336	Up	SOD2
P04179	122	K	1.875	0.0012852	Up	SOD2
P04406	219	K	2.228	0.0020854	Up	GAPDH
P04406	194	K	1.973	0.00146696	Up	GAPDH
P05141	163	K	3.706	0.00250253	Up	SLC25A5
P05141	105	K	2.639	0.000692548	Up	SLC25A5
P05141	92	K	3.539	0.0482765	Up	SLC25A5
P06454	103	K	2.024	0.028318	Up	PTMA
P06730	162	K	1.821	0.0108967	Up	EIF4E
P06733	335	K	1.715	0.025608	Up	ENO1
P06733	233	K	1.864	0.000791594	Up	ENO1
P06733	60	K	2.374	0.00667107	Up	ENO1
P06748	27	K	2.184	0.00274546	Up	NPM1
P06748	267	K	2.569	0.00123034	Up	NPM1
P06748	141	K	1.989	0.0003055	Up	NPM1
P06748	154	K	1.874	0.00341566	Up	NPM1
P06748	223	K	2.607	0.0208139	Up	NPM1
P07355	204	K	2.045	0.0078598	Up	ANXA2
P07437	58	K	2.283	0.00119055	Up	TUBB
P07814	497	K	1.586	0.0488934	Up	EPRS1
P07900	558	K	1.67	0.00338368	Up	HSP90AA1
P07900	283	K	1.763	0.027162	Up	HSP90AA1
P07900	407	K	2.327	0.0111891	Up	HSP90AA1
P07910	157	K	2.125	0.000276086	Up	HNRNPC
P07910	189	K	2.25	0.00179288	Up	HNRNPC
P07910	206	K	2.229	0.0365286	Up	HNRNPC
P07954	61	K	2.596	0.007249	Up	FH
P07954	223	K	2.602	0.00173818	Up	FH
Q02447	634	K	2.473	0.0123895	Up	SP3
P08133	265	K	2.225	0.0495747	Up	ANXA6
P08133	483	K	1.851	0.020402	Up	ANXA6
P08133	63	K	1.643	0.0259162	Up	ANXA6
P08238	347	K	2.932	0.0076197	Up	HSP90AB1
P08238	411	K	2.845	0.0356148	Up	HSP90AB1
P08559	77	K	1.985	0.000292536	Up	PDHA1
P08559	321	K	6.29	0.0056032	Up	PDHA1
P08865	42	K	1.678	0.029622	Up	RPSA
P09001	209	K	2.071	0.00319366	Up	MRPL3
P09012	98	K	1.653	0.0237678	Up	SNRPA
P09382	64	K	3.662	0.013046	Up	LGALS1
P09417	124	K	1.674	0.0010146	Up	QDPR
P09417	102	K	1.732	0.00747452	Up	QDPR
P26583	12	K	2.831	0.000816576	Up	HMGB2
P09543	178	K	2.237	0.0217906	Up	CNP
P09622	66	K	1.599	7.72536e-05	Up	DLD
P09622	430	K	1.543	0.0136138	Up	DLD
P09622	104	K	1.755	0.0292687	Up	DLD
P09622	143	K	2.622	0.000912116	Up	DLD
P09622	417	K	1.528	0.0010651	Up	DLD
P09622	445	K	1.922	3.8895e-05	Up	DLD
P09622	159	K	2.589	0.00925933	Up	DLD
P09622	166	K	2.46	2.25052e-05	Up	DLD
P09622	277	K	1.591	0.0138897	Up	DLD
P09651	3	K	5.34	6.28327e-05	Up	HNRNPA1
P09651	350	K	2.691	0.00245492	Up	HNRNPA1
P09661	221	K	1.91	0.00581848	Up	SNRPA1
P09874	108	K	1.714	0.00459842	Up	PARP1
P09874	621	K	3.025	0.00595284	Up	PARP1
P0DP25	22	K	2.857	0.0312059	Up	CALM3
P0DP25	95	K	1.734	0.0472872	Up	CALM3
P10515	473	K	1.936	0.00672028	Up	DLAT
P10606	68	K	2.576	0.0116477	Up	COX5B
P10606	57	K	2.963	0.00428888	Up	COX5B
P10809	249	K	2.869	0.0104564	Up	HSPD1
P10809	359	K	2.306	0.00012255	Up	HSPD1
P10809	191	K	2.555	0.00308221	Up	HSPD1
P10809	364	K	2.955	0.00073965	Up	HSPD1
P10809	292	K	2.689	0.0373258	Up	HSPD1
P10809	72	K	1.834	0.017061	Up	HSPD1
P10809	352	K	2.484	0.00235179	Up	HSPD1
P11310	256	K	2.437	0.000887786	Up	ACADM
P12235	272	K	1.997	0.0239155	Up	SLC25A4
P12235	166	K	1.536	0.0008055	Up	SLC25A4
P12235	96	K	1.684	0.0380653	Up	SLC25A4
P12268	438	K	2.912	0.00011558	Up	IMPDH2
P12268	511	K	8.758	9.62188e-05	Up	IMPDH2
P12270	1563	K	2.189	0.000231169	Up	TPR
P12270	723	K	2.45	0.00245754	Up	TPR
P12270	713	K	1.554	0.0412404	Up	TPR
P12270	925	K	2.429	0.000634313	Up	TPR
P13010	565	K	3.333	0.000764974	Up	XRCC5
P13010	702	K	5.867	0.000115409	Up	XRCC5
P13051	100	K	1.753	0.0241646	Up	UNG
P13073	67	K	2.02	0.00409682	Up	COX4I1
P13073	87	K	2.281	0.000151593	Up	COX4I1
P13639	571	K	2.664	0.0363932	Up	EEF2
P13639	239	K	1.968	0.0186887	Up	EEF2
P13639	275	K	1.979	0.00788575	Up	EEF2
P13804	62	K	1.751	0.00825878	Up	ETFA
P13804	226	K	3.811	0.000357582	Up	ETFA
P13804	206	K	2.364	0.000970217	Up	ETFA
P13995	152	K	2.721	0.023905	Up	MTHFD2
P14324	123	K	3.288	0.0123706	Up	FDPS
P14550	127	K	2.549	0.0487031	Up	AKR1A1
P14625	479	K	1.725	0.0127752	Up	HSP90B1
P14735	192	K	1.692	0.000967255	Up	IDE
P14866	418	K	2.064	0.0213333	Up	HNRNPL
P15311	344	K	2.595	0.0113874	Up	EZR
P15531	31	K	1.692	0.0456765	Up	NME1
P15924	1033	K	1.675	0.0457631	Up	DSP
P16949	52	K	2.066	0.0346385	Up	STMN1
P17096	7	K	52.375	0.00176689	Up	HMGA1
P17987	400	K	1.809	0.00339337	Up	TCP1
P18621	13	K	2.359	4.94074e-05	Up	RPL17
P18859	99	K	1.899	0.014511	Up	ATP5PF
P18859	79	K	1.898	0.00276612	Up	ATP5PF
P18887	260	K	1.789	0.00156317	Up	XRCC1
P19338	9	K	1.871	0.00336509	Up	NCL
P19338	124	K	2.91	0.00144582	Up	NCL
P19338	109	K	4.902	0.00112565	Up	NCL
P19338	110	K	4.302	0.000170609	Up	NCL
P19338	116	K	2.78	0.00110371	Up	NCL
P19338	70	K	2.638	0.000105457	Up	NCL
P19338	577	K	1.805	0.0117731	Up	NCL
P19338	102	K	3.433	0.00134809	Up	NCL
P19404	68	K	2.278	0.000181405	Up	NDUFV2
P20700	111	K	2.373	0.000823446	Up	LMNB1
P20700	532	K	1.818	0.00538895	Up	LMNB1
P20810	43	K	1.907	0.0316829	Up	CAST
P21796	266	K	2.298	0.0108017	Up	VDAC1
P22033	343	K	2.448	0.00393737	Up	MMUT
P22087	102	K	1.739	0.00231655	Up	FBL
P22087	121	K	1.687	0.00309906	Up	FBL
P22087	84	K	2.484	7.24799e-05	Up	FBL
P22234	11	K	1.989	0.0220263	Up	PAICS
P22314	68	K	2.286	0.00226157	Up	UBA1
P22626	104	K	3.958	0.0012794	Up	HNRNPA2B1
P22626	3	K	1.934	0.0482141	Up	HNRNPA2B1
P22695	250	K	1.61	0.0174852	Up	UQCRC2
P22695	92	K	2.715	3.17934e-05	Up	UQCRC2
P22695	159	K	3.151	0.0218821	Up	UQCRC2
P23246	217	K	3.631	0.000543423	Up	SFPQ
P23368	224	K	1.761	0.0355214	Up	ME2
P23396	108	K	2.881	0.00624403	Up	RPS3
P58876	24	K	1.823	0.00312134	Up	H2BC5
P23528	19	K	1.699	0.0162732	Up	CFL1
P23528	92	K	2.633	0.00707698	Up	CFL1
P24752	223	K	1.793	0.00259703	Up	ACAT1
P25440	31	K	5.173	0.0275039	Up	BRD2
P25685	195	K	1.512	0.00343918	Up	DNAJB1
P25685	181	K	2.032	0.00969027	Up	DNAJB1
P25705	261	K	1.978	0.0020068	Up	ATP5F1A
P25705	161	K	8.957	0.000255611	Up	ATP5F1A
P25787	53	K	1.7	0.00127116	Up	PSMA2
P25788	206	K	2.261	0.00270606	Up	PSMA3
P25788	57	K	1.59	0.0190967	Up	PSMA3
P26038	165	K	2.162	0.00243818	Up	MSN
P26641	434	K	1.828	0.00151626	Up	EEF1G
P26641	277	K	1.861	0.043275	Up	EEF1G
P27635	188	K	2.145	0.0498134	Up	RPL10
P27694	163	K	2.012	0.000258445	Up	RPA1
P27694	167	K	2.028	0.0351838	Up	RPA1
P27695	197	K	1.909	0.00359912	Up	APEX1
P27695	276	K	2.534	0.00385834	Up	APEX1
P27708	1411	K	1.796	0.000285889	Up	CAD
P27797	143	K	1.722	0.0380616	Up	CALR
P28288	347	K	1.955	0.000198769	Up	ABCD3
P28838	476	K	2.145	0.0193618	Up	LAP3
P28838	229	K	1.796	0.00197265	Up	LAP3
P29401	260	K	1.926	0.0178425	Up	TKT
P29401	6	K	1.893	0.00871656	Up	TKT
P29401	310	K	1.685	0.0294795	Up	TKT
P29692	117	K	1.524	0.0089223	Up	EEF1D
P30101	362	K	1.872	0.0439564	Up	PDIA3
P30405	91	K	1.614	0.00584405	Up	PPIF
P30405	190	K	1.87	0.00161182	Up	PPIF
P30405	118	K	1.955	0.0472176	Up	PPIF
P30414	1216	K	1.652	0.048066	Up	NKTR
P30414	179	K	2.319	0.0185977	Up	NKTR
P30837	511	K	2.004	0.00303631	Up	ALDH1B1
P31040	250	K	2.547	0.000714221	Up	SDHA
P31040	547	K	1.527	0.00343387	Up	SDHA
P31040	616	K	2.446	0.0112178	Up	SDHA
P31040	517	K	1.754	0.00772296	Up	SDHA
P63104	122	K	20.078	0.000424367	Up	YWHAZ
P32119	196	K	5.16	2.20775e-05	Up	PRDX2
P33991	409	K	6.054	4.96528e-06	Up	MCM4
P33993	28	K	3.308	0.0157213	Up	MCM7
P34897	302	K	2.125	0.0109634	Up	SHMT2
P34897	280	K	1.62	0.0396882	Up	SHMT2
P34897	181	K	3.242	0.0229991	Up	SHMT2
P34897	469	K	2.332	0.0128393	Up	SHMT2
P34897	409	K	2.648	0.00605858	Up	SHMT2
P34897	103	K	2.704	4.04124e-05	Up	SHMT2
P35249	13	K	2.369	0.0041275	Up	RFC4
P35250	304	K	3.117	0.00721015	Up	RFC2
P35250	192	K	1.744	0.000719651	Up	RFC2
P35269	435	K	1.711	0.0133218	Up	GTF2F1
P35579	1802	K	6.056	0.000113682	Up	MYH9
P35579	299	K	3.604	0.00212304	Up	MYH9
Q92804	261	K	1.757	0.0165519	Up	TAF15
P35914	137	K	2.222	0.0134657	Up	HMGCL
P36542	115	K	1.53	0.00300751	Up	ATP5F1C
P36957	267	K	6.73	0.000311936	Up	DLST
P36957	217	K	1.801	0.0239712	Up	DLST
P38159	150	K	9.635	0.00129691	Up	RBMX
P38646	300	K	2.257	0.000697648	Up	HSPA9
P38646	600	K	8.219	0.00116159	Up	HSPA9
P38646	175	K	3.938	0.00145752	Up	HSPA9
P38646	135	K	4.793	0.000425834	Up	HSPA9
P60842	284	K	2.149	0.0478724	Up	EIF4A1
P40227	199	K	14.37	0.0015203	Up	CCT6A
P40926	78	K	3.237	0.0217373	Up	MDH2
P40926	307	K	1.996	0.000830494	Up	MDH2
P40926	335	K	1.9	7.5035e-05	Up	MDH2
P40939	350	K	3.129	0.00110507	Up	HADHA
P40939	406	K	2.353	0.00281801	Up	HADHA
P40939	60	K	1.961	0.000604974	Up	HADHA
P40939	295	K	3.748	0.000719748	Up	HADHA
P42126	89	K	2.864	0.000109757	Up	ECI1
P42285	78	K	1.58	0.0115295	Up	MTREX
P42285	51	K	2.77	0.0342016	Up	MTREX
P42345	1218	K	3.323	0.0165872	Up	MTOR
P42704	1347	K	0.549	0.0457565	Down	LRPPRC
P42704	1128	K	1.962	0.00168975	Up	LRPPRC
P42704	1326	K	3.931	0.000884096	Up	LRPPRC
P42704	1357	K	3.863	0.0256531	Up	LRPPRC
P42704	295	K	2.269	0.00215088	Up	LRPPRC
P42765	137	K	3.256	5.85417e-05	Up	ACAA2
P43243	554	K	2.561	0.0191392	Up	MATR3
P43243	836	K	2.515	0.00264413	Up	MATR3
P43246	73	K	0.527	0.0128636	Down	MSH2
P43897	76	K	2.593	0.00850669	Up	TSFM
P46013	1294	K	3.253	0.00498353	Up	MKI67
P46087	92	K	2.199	0.00385453	Up	NOP2
P46100	927	K	2.197	0.00430804	Up	ATRX
P46100	2490	K	1.629	0.00784548	Up	ATRX
P46777	220	K	1.688	0.0148703	Up	RPL5
P48047	162	K	1.763	0.00711922	Up	ATP5PO
P48047	176	K	1.816	0.00634815	Up	ATP5PO
P48047	199	K	1.886	0.00211515	Up	ATP5PO
P48426	378	K	1.684	0.00649486	Up	PIP4K2A
P48729	8	K	0.624	0.00695696	Down	CSNK1A1
P48735	275	K	1.928	0.00132335	Up	IDH2
P48735	263	K	3.334	0.0473332	Up	IDH2
P48735	180	K	3.629	0.00572564	Up	IDH2
P49327	1704	K	2.747	0.00498593	Up	FASN
P49368	222	K	1.673	0.00934391	Up	CCT3
P49368	248	K	2.425	0.0318218	Up	CCT3
P49406	221	K	2.16	0.000843084	Up	MRPL19
P49411	70	K	2.158	0.00077246	Up	TUFM
P49748	71	K	1.719	0.00302031	Up	ACADVL
P49748	195	K	2.641	0.0018051	Up	ACADVL
P49748	556	K	3.255	0.00268823	Up	ACADVL
P49750	241	K	2.275	0.00265142	Up	YLPM1
P49750	808	K	1.858	0.0107991	Up	YLPM1
P49790	954	K	3.331	0.0066344	Up	NUP153
P49790	705	K	1.586	0.00225574	Up	NUP153
P49790	1066	K	1.982	0.00336324	Up	NUP153
P49790	384	K	1.625	0.0308197	Up	NUP153
P49792	1842	K	0.663	0.00715851	Down	RANBP2
P49821	375	K	1.81	0.0124522	Up	NDUFV1
P49914	150	K	1.788	0.00345375	Up	MTHFS
P49915	389	K	1.654	0.00448093	Up	GMPS
P49916	663	K	2.757	0.0416507	Up	LIG3
P50502	353	K	1.54	0.0137909	Up	ST13
P50990	326	K	1.981	0.0041378	Up	CCT8
P51003	650	K	1.792	0.0105212	Up	PAPOLA
P51649	135	K	3.888	0.0150695	Up	ALDH5A1
P51659	139	K	16.203	0.000321613	Up	HSD17B4
P51659	46	K	3.428	0.0201524	Up	HSD17B4
P51659	84	K	1.69	0.00119674	Up	HSD17B4
P51665	204	K	1.61	0.0172354	Up	PSMD7
P51991	126	K	2.812	2.21484e-05	Up	HNRNPA3
P51991	29	K	2.623	0.000203996	Up	HNRNPA3
P51991	4	K	2.167	0.000216604	Up	HNRNPA3
P52272	239	K	4.78	0.000923892	Up	HNRNPM
P52565	43	K	2.062	0.0449234	Up	ARHGDIA
P52597	224	K	1.756	0.0144317	Up	HNRNPF
P52739	139	K	2.525	0.0374269	Up	ZNF131
P52756	787	K	4.679	0.00334562	Up	RBM5
P52758	60	K	1.665	0.0104029	Up	RIDA
P53396	978	K	12.96	0.000128381	Up	ACLY
P53597	66	K	2.003	0.00169168	Up	SUCLG1
P53597	90	K	1.536	0.0440814	Up	SUCLG1
P53597	57	K	1.95	0.00902377	Up	SUCLG1
P53999	68	K	2.11	0.0260324	Up	SUB1
P54577	356	K	0.611	0.0143461	Down	YARS1
P54577	520	K	1.654	0.033819	Up	YARS1
P54819	14	K	2.689	0.0120634	Up	AK2
P54886	347	K	2.694	0.000488372	Up	ALDH18A1
P55265	433	K	1.737	0.00304768	Up	ADAR
P55786	261	K	1.601	0.00293532	Up	NPEPPS
P55809	421	K	2.992	0.00883649	Up	OXCT1
P58876	35	K	1.882	0.0406926	Up	H2BC5
Q15366	23	K	1.634	0.0197013	Up	PCBP2
P60174	6	K	1.743	0.022114	Up	TPI1
P60866	59	K	2.793	0.0293411	Up	RPS20
P60900	104	K	2.208	0.0223866	Up	PSMA6
P60903	23	K	2.201	0.00468913	Up	S100A10
P60953	163	K	1.534	0.0284236	Up	CDC42
P61006	3	K	0.401	0.0155187	Down	RAB8A
P61026	102	K	2.415	0.0176028	Up	RAB10
P61247	56	K	0.61	0.0387803	Down	RPS3A
P61604	66	K	2.896	0.00154886	Up	HSPE1
P61604	8	K	2.841	0.00264337	Up	HSPE1
P61604	28	K	3.333	0.0161888	Up	HSPE1
P61604	40	K	2.513	0.00525155	Up	HSPE1
P61604	54	K	2.181	0.000138538	Up	HSPE1
P61604	80	K	2.157	0.0150747	Up	HSPE1
P61916	116	K	1.513	0.0244702	Up	NPC2
P61964	112	K	1.55	0.0448247	Up	WDR5
P61978	34	K	2.246	0.00155961	Up	HNRNPK
P62081	178	K	2.135	0.0124033	Up	RPS7
P62750	70	K	1.768	0.0217457	Up	RPL23A
P62805	9	K	0.578	0.0413721	Down	H4C1
P62805	13	K	0.58	0.0413649	Down	H4C1
P62847	37	K	1.996	0.00270983	Up	RPS24
P62906	106	K	2.128	0.00256017	Up	RPL10A
P62913	159	K	2.512	0.00321237	Up	RPL11
P62937	31	K	2.223	0.00178647	Up	PPIA
P62995	197	K	1.78	0.00688327	Up	TRA2B
P67936	215	K	1.523	0.00761459	Up	TPM4
P68104	450	K	3.996	0.00569949	Up	EEF1A1
P68104	453	K	4.359	0.00582833	Up	EEF1A1
P68104	457	K	3.996	0.00569949	Up	EEF1A1
P68104	5	K	1.652	0.0401695	Up	EEF1A1
P78316	643	K	1.711	0.00164062	Up	NOP14
P78347	561	K	1.688	0.0080314	Up	GTF2I
P78417	152	K	1.76	0.0253143	Up	GSTO1
P78527	2694	K	1.64	0.00432005	Up	PRKDC
P78527	3642	K	2.179	0.000434845	Up	PRKDC
P78527	1895	K	1.616	0.0138928	Up	PRKDC
P82094	121	K	0.443	0.00470355	Down	TMF1
P82650	258	K	2.094	0.00251655	Up	MRPS22
P82650	255	K	3.659	0.000532688	Up	MRPS22
P82650	248	K	2.74	0.00437296	Up	MRPS22
P82933	287	K	1.534	0.00329427	Up	MRPS9
P83731	27	K	2.337	0.000873427	Up	RPL24
P83881	89	K	2.244	0.000714367	Up	RPL36A
P99999	54	K	1.626	0.00169924	Up	CYCS
Q00839	626	K	4.339	0.00135538	Up	HNRNPU
Q00839	565	K	2.258	0.0206298	Up	HNRNPU
Q00839	387	K	2.928	0.00579779	Up	HNRNPU
Q00839	516	K	6.875	0.000406795	Up	HNRNPU
Q01105	83	K	1.855	0.00317044	Up	SET
Q01105	132	K	1.775	0.0358066	Up	SET
Q01844	439	K	4.957	0.0292426	Up	EWSR1
Q02218	401	K	2.514	0.00997293	Up	OGDH
Q02252	76	K	3.081	0.00446476	Up	ALDH6A1
Q02790	390	K	1.662	0.00811648	Up	FKBP4
Q02790	287	K	1.901	0.000101804	Up	FKBP4
Q02952	526	K	2.026	0.0147012	Up	AKAP12
Q03164	2490	K	1.809	0.0143944	Up	KMT2A
Q03164	2958	K	3.333	0.00332521	Up	KMT2A
Q04837	103	K	1.545	0.0265471	Up	SSBP1
Q04837	81	K	2.396	0.00281742	Up	SSBP1
Q05639	395	K	1.688	0.0461896	Up	EEF1A2
Q05682	640	K	2.333	0.0317941	Up	CALD1
Q06124	198	K	2.035	0.0291334	Up	PTPN11
Q06124	131	K	2.176	0.000482832	Up	PTPN11
Q06203	62	K	2.07	0.00240826	Up	PPAT
Q06203	65	K	1.99	0.0044088	Up	PPAT
Q07021	91	K	10.042	0.00455932	Up	C1QBP
Q07666	200	K	1.554	0.0439949	Up	KHDRBS1
Q08211	29	K	1.679	0.0323859	Up	DHX9
Q08211	146	K	1.708	0.0434226	Up	DHX9
Q08211	14	K	1.515	0.0494132	Up	DHX9
Q08211	264	K	1.96	0.0332622	Up	DHX9
Q08426	290	K	2.473	0.00370491	Up	EHHADH
Q08945	105	K	2.969	0.00580749	Up	SSRP1
Q09028	4	K	6.139	0.00256683	Up	RBBP4
Q09472	1570	K	2.731	0.0403789	Up	EP300
Q09472	1769	K	2.636	0.00657716	Up	EP300
Q09666	1191	K	1.779	0.027695	Up	AHNAK
Q12872	935	K	1.761	0.00943876	Up	SFSWAP
Q12888	1332	K	2.366	0.00483791	Up	TP53BP1
Q12905	59	K	4.169	0.0311409	Up	ILF2
Q12931	431	K	2.787	7.74327e-05	Up	TRAP1
Q13011	65	K	3.469	0.0266803	Up	ECH1
Q13111	459	K	2.97	0.00798328	Up	CHAF1A
Q13123	541	K	1.644	0.00825286	Up	IK
Q13177	191	K	2.029	0.00564724	Up	PAK2
Q13177	216	K	7.764	0.0354288	Up	PAK2
Q13185	5	K	9.027	0.000138519	Up	CBX3
Q13243	167	K	2.116	0.00036216	Up	SRSF5
Q13283	76	K	3.946	0.017551	Up	G3BP1
Q13356	482	K	2.591	0.00287798	Up	PPIL2
Q13418	426	K	2.314	0.0048105	Up	ILK
Q13427	726	K	2.478	0.0213002	Up	PPIG
Q13428	244	K	2.836	0.00669486	Up	TCOF1
Q13428	308	K	1.64	0.0136078	Up	TCOF1
Q13428	313	K	2.642	0.00123734	Up	TCOF1
Q13428	322	K	2.166	0.00482453	Up	TCOF1
Q13428	746	K	2.042	0.028385	Up	TCOF1
Q13428	296	K	1.782	0.0188693	Up	TCOF1
Q13428	367	K	3.971	0.000130508	Up	TCOF1
Q13428	393	K	1.988	0.000523116	Up	TCOF1
Q13428	918	K	3.419	0.000298874	Up	TCOF1
Q13428	811	K	2.23	0.0060516	Up	TCOF1
Q13428	74	K	2.245	0.0119396	Up	TCOF1
Q13428	637	K	1.677	0.022707	Up	TCOF1
Q13428	519	K	1.708	0.030365	Up	TCOF1
Q13428	146	K	2.886	0.000146711	Up	TCOF1
Q13428	155	K	2.094	0.00434761	Up	TCOF1
Q13442	172	K	2.042	0.00176161	Up	PDAP1
Q13547	412	K	2.311	0.01878	Up	HDAC1
Q13564	338	K	2.099	0.0267581	Up	NAE1
Q13564	341	K	1.703	0.00976193	Up	NAE1
Q13616	689	K	1.542	0.00676245	Up	CUL1
Q13619	8	K	1.998	0.0173976	Up	CUL4A
Q13825	100	K	1.645	0.000470747	Up	AUH
Q13838	36	K	1.858	0.00403951	Up	DDX39B
Q13868	24	K	0.533	0.0235246	Down	EXOSC2
Q14004	556	K	1.645	0.0439651	Up	CDK13
Q14103	110	K	2.176	0.0353014	Up	HNRNPD
Q14149	231	K	2.145	0.026733	Up	MORC3
Q14202	489	K	4.515	0.00564724	Up	ZMYM3
Q14315	2022	K	0.4	0.00788202	Down	FLNC
Q14676	1004	K	2.231	0.00537073	Up	MDC1
Q14676	812	K	2.042	0.00346925	Up	MDC1
Q14739	601	K	2.214	0.00068984	Up	LBR
Q14814	511	K	2.706	0.00751431	Up	MEF2D
Q14966	86	K	2.052	0.00481329	Up	ZNF638
Q14966	642	K	1.905	0.0152941	Up	ZNF638
Q14978	396	K	2.501	0.000856707	Up	NOLC1
Q15029	352	K	1.618	0.0349575	Up	EFTUD2
Q15031	445	K	1.991	0.000815989	Up	LARS2
Q15061	198	K	1.674	0.0128484	Up	WDR43
Q15067	651	K	2.011	0.00175001	Up	ACOX1
Q15067	437	K	2.491	9.07343e-05	Up	ACOX1
Q15067	500	K	2.654	0.00297761	Up	ACOX1
Q15067	512	K	2.708	0.0445163	Up	ACOX1
Q15149	2025	K	2.001	0.0122302	Up	PLEC
Q15185	33	K	2.449	0.00359261	Up	PTGES3
Q15233	190	K	1.915	0.00301303	Up	NONO
Q15233	371	K	1.943	0.0438725	Up	NONO
Q15269	700	K	3.576	6.44421e-05	Up	PWP2
Q15365	115	K	1.868	0.0369994	Up	PCBP1
Q15393	294	K	1.988	0.0337495	Up	SF3B3
Q15424	54	K	1.746	0.00988209	Up	SAFB
Q15424	570	K	1.982	0.00454909	Up	SAFB
Q15424	475	K	1.924	0.00340414	Up	SAFB
Q15428	194	K	1.563	0.0492726	Up	SF3A2
Q15428	76	K	2.509	0.000303003	Up	SF3A2
Q15459	486	K	2.662	0.00147648	Up	SF3A1
Q15532	13	K	1.85	0.00541396	Up	SS18
Q15648	1177	K	2.21	0.0133707	Up	MED1
Q15648	1152	K	1.654	0.000982271	Up	MED1
Q15847	70	K	1.647	0.0109025	Up	ADIRF
Q16513	77	K	1.693	0.0364946	Up	PKN2
Q16576	119	K	2.726	0.000173371	Up	RBBP7
Q16629	24	K	2.134	0.00403162	Up	SRSF7
Q16629	12	K	1.742	0.0108075	Up	SRSF7
Q16637	45	K	1.54	0.00289929	Up	SMN1
Q16658	74	K	2.176	0.0238847	Up	FSCN1
Q16698	110	K	1.568	0.0290505	Up	DECR1
Q16740	214	K	1.807	0.0114424	Up	CLPP
Q16740	211	K	2.003	0.0289576	Up	CLPP
Q16822	491	K	3.289	0.010912	Up	PCK2
Q16836	212	K	2.22	0.000150489	Up	HADH
Q16850	166	K	1.744	0.0243018	Up	CYP51A1
Q29RF7	1136	K	1.575	0.0248817	Up	PDS5A
Q4G0J3	428	K	1.937	0.0238775	Up	LARP7
Q4G0N4	397	K	2.251	0.0089658	Up	NADK2
Q4G0N4	304	K	1.518	0.0303626	Up	NADK2
Q53H82	247	K	1.731	0.00355851	Up	LACTB2
Q53H82	258	K	1.593	0.0173129	Up	LACTB2
Q53H82	191	K	2.181	0.0174107	Up	LACTB2
Q53R41	360	K	2.29	0.0082805	Up	FASTKD1
Q56VL3	41	K	1.74	0.000391654	Up	OCIAD2
Q5HYJ3	52	K	3.736	0.00212938	Up	FAM76B
Q5JRX3	770	K	1.684	0.00993769	Up	PITRM1
Q5SRE5	38	K	2.112	0.0342755	Up	NUP188
Q5T200	1388	K	1.852	0.012666	Up	ZC3H13
Q5T9A4	104	K	1.715	0.0330304	Up	ATAD3B
Q9NVI7	329	K	2.275	0.000163957	Up	ATAD3A
Q5UIP0	1730	K	1.892	0.0379345	Up	RIF1
Q5UIP0	1738	K	1.892	0.0379345	Up	RIF1
Q5VWN6	1119	K	2.091	0.0369931	Up	TASOR2
Q68E01	7	K	1.627	0.00158505	Up	INTS3
Q6L8Q7	462	K	1.751	0.00473278	Up	PDE12
Q6L8Q7	377	K	2.56	0.000521177	Up	PDE12
Q6NUK1	228	K	1.935	0.00215056	Up	SLC25A24
Q6NUK1	320	K	1.578	0.0301542	Up	SLC25A24
Q6NUM9	101	K	2.096	0.00142857	Up	RETSAT
Q6NVY1	353	K	2.799	0.00378424	Up	HIBCH
Q6NVY1	257	K	1.738	0.0113028	Up	HIBCH
Q6NVY1	252	K	4.899	0.00210939	Up	HIBCH
Q96GK7	234	K	3.542	0.000124317	Up	FAHD2A
Q6P2Q9	1792	K	1.612	0.0220492	Up	PRPF8
Q6P4A7	197	K	3.193	2.35845e-05	Up	SFXN4
Q6P4R8	1198	K	2.737	0.000499957	Up	NFRKB
Q6PJT7	198	K	2.021	0.0151432	Up	ZC3H14
Q6PJT7	352	K	1.522	0.00530229	Up	ZC3H14
Q6PL18	772	K	0.259	0.00238388	Down	ATAD2
Q6UB35	596	K	2.392	0.00134554	Up	MTHFD1L
Q6UX04	230	K	1.523	0.0348948	Up	CWC27
Q6VN20	293	K	3.284	0.0394018	Up	RANBP10
Q75N03	288	K	1.56	0.009565	Up	CBLL1
Q76FK4	687	K	1.976	0.0352416	Up	NOL8
Q7L014	1025	K	2.359	0.00168047	Up	DDX46
Q7L2H7	176	K	2.658	0.00187365	Up	EIF3M
Q7L2J0	163	K	2.424	0.0300708	Up	MEPCE
Q7RTV0	3	K	0.236	2.55762e-05	Down	PHF5A
Q7Z333	2494	K	1.851	0.0112188	Up	SETX
Q7Z422	86	K	2.307	0.00170348	Up	SZRD1
Q7Z6E9	1344	K	2.976	0.00408876	Up	RBBP6
Q86UY8	260	K	1.765	0.0216211	Up	NT5DC3
Q86VM9	168	K	2.067	0.0137044	Up	ZC3H18
Q86VM9	789	K	15.052	0.00210618	Up	ZC3H18
Q86WA6	271	K	1.867	0.00991836	Up	BPHL
Q86XP3	145	K	2.707	0.0179056	Up	DDX42
Q8IU81	73	K	1.79	0.00446512	Up	IRF2BP1
Q8IWS0	173	K	1.551	0.0149799	Up	PHF6
Q8IWZ8	427	K	1.669	0.0210551	Up	SUGP1
Q8IWZ8	150	K	2.403	0.00354155	Up	SUGP1
Q8IX01	1035	K	2.337	0.00126531	Up	SUGP2
Q8IX12	659	K	1.539	0.00436825	Up	CCAR1
Q8IX18	726	K	2.441	0.00549319	Up	DHX40
Q8IX18	730	K	2.441	0.00549319	Up	DHX40
Q8IY81	233	K	2.254	0.00107365	Up	FTSJ3
Q8N0X4	57	K	1.968	0.000237169	Up	CLYBL
Q8N163	215	K	1.797	0.000718271	Up	CCAR2
Q8N465	101	K	2.941	0.0012279	Up	D2HGDH
Q8N6T3	285	K	0.561	0.00969146	Down	ARFGAP1
Q8N8A6	601	K	0.596	0.0193706	Down	DDX51
Q8NC51	122	K	1.635	0.012652	Up	SERBP1
Q8NCD3	681	K	1.931	0.0040093	Up	HJURP
Q8NFD5	648	K	2.124	0.0062136	Up	ARID1B
Q8NI35	1027	K	0.583	0.01316	Down	PATJ
Q8NI36	152	K	2.949	0.00291723	Up	WDR36
Q8TAQ2	373	K	6.149	3.224e-05	Up	SMARCC2
Q8TAQ2	101	K	1.651	0.00994405	Up	SMARCC2
Q8TAQ2	275	K	1.763	0.0069457	Up	SMARCC2
Q8TCS8	591	K	1.743	0.00301573	Up	PNPT1
Q8TCS8	306	K	1.595	0.0342438	Up	PNPT1
Q8TEP8	181	K	0.636	0.0149051	Down	CEP192
Q8WUM0	135	K	1.991	0.0117967	Up	NUP133
Q8WWQ0	1399	K	2.565	0.00309414	Up	PHIP
Q8WWY3	438	K	1.912	0.00576393	Up	PRPF31
Q8WXH0	2951	K	6.118	0.00230594	Up	SYNE2
Q8WYH8	114	K	3.685	0.0463262	Up	ING5
Q92466	11	K	1.976	0.0269891	Up	DDB2
Q92499	687	K	1.933	0.0371719	Up	DDX1
Q92576	386	K	1.654	0.0476297	Up	PHF3
Q92576	566	K	3.071	0.00275102	Up	PHF3
Q92667	160	K	0.598	0.00997529	Down	AKAP1
Q92733	250	K	2.829	0.0201768	Up	PRCC
Q92793	1587	K	0.473	0.00319409	Down	CREBBP
Q92793	1591	K	0.277	0.000404811	Down	CREBBP
Q92793	1592	K	0.402	0.00105369	Down	CREBBP
Q92793	1595	K	0.407	0.000981184	Down	CREBBP
Q92793	1597	K	0.407	0.000981184	Down	CREBBP
Q92793	1014	K	1.617	0.0371837	Up	CREBBP
Q92804	265	K	1.697	0.00678677	Up	TAF15
Q92882	3	K	3.213	0.000721699	Up	OSTF1
Q92922	750	K	2.474	0.0349454	Up	SMARCC1
Q92922	354	K	1.649	0.0149121	Up	SMARCC1
Q92922	303	K	2.223	0.00498967	Up	SMARCC1
Q92922	346	K	1.743	0.00122106	Up	SMARCC1
Q92934	36	K	0.485	0.00197662	Down	BAD
Q93009	1084	K	2.476	0.00576304	Up	USP7
Q969S9	233	K	1.719	0.00439326	Up	GFM2
Q96AG4	73	K	1.566	0.046259	Up	LRRC59
Q96AG4	143	K	2.114	0.00379586	Up	LRRC59
Q96BW9	68	K	1.829	0.0276608	Up	TAMM41
Q96C86	10	K	1.809	0.00106075	Up	DCPS
Q96C86	128	K	1.999	0.0252289	Up	DCPS
Q96CM8	182	K	1.734	0.00705803	Up	ACSF2
Q96CT7	11	K	3.196	0.0072122	Up	CCDC124
Q96CU9	42	K	5.636	0.0021892	Up	FOXRED1
Q96D71	462	K	0.666	0.0180884	Down	REPS1
Q96DI7	18	K	1.942	0.0126827	Up	SNRNP40
Q96E11	100	K	2.111	7.80471e-05	Up	MRRF
Q96FZ2	294	K	2.544	0.0454232	Up	HMCES
Q96HS1	144	K	3.243	0.000682918	Up	PGAM5
Q96HY7	827	K	1.736	0.00730508	Up	DHTKD1
Q96I99	93	K	1.757	0.0117942	Up	SUCLG2
Q96I99	271	K	2.274	0.000581045	Up	SUCLG2
Q96JM3	731	K	1.828	0.0323837	Up	CHAMP1
Q96JM3	617	K	2.27	0.00713376	Up	CHAMP1
Q96JM3	381	K	2.026	0.00989343	Up	CHAMP1
Q96JY6	336	K	1.947	0.0181036	Up	PDLIM2
Q96KR1	509	K	1.921	0.0108588	Up	ZFR
Q96L91	733	K	4.112	0.00832006	Up	EP400
Q96L91	3155	K	2.616	0.0381015	Up	EP400
Q96N67	1962	K	1.649	0.00166938	Up	DOCK7
Q96PK6	149	K	2.365	0.000763476	Up	RBM14
Q96PK6	164	K	3.532	0.00029856	Up	RBM14
Q96PV6	226	K	1.997	0.0024578	Up	LENG8
Q96Q11	320	K	1.694	0.0165011	Up	TRNT1
Q96RP9	302	K	1.676	0.0174269	Up	GFM1
Q96RQ3	295	K	2.501	0.00259857	Up	MCCC1
Q96S59	521	K	1.868	0.0479574	Up	RANBP9
Q96SK2	304	K	5.213	0.00329824	Up	TMEM209
Q96ST3	1164	K	4.446	0.000195528	Up	SIN3A
Q96SZ5	55	K	1.646	0.0140759	Up	ADO
Q96T23	1050	K	1.97	0.000399879	Up	RSF1
Q99417	20	K	1.886	0.00889542	Up	MYCBP
Q99623	244	K	1.66	0.00623421	Up	PHB2
Q99873	145	K	1.95	0.00430209	Up	PRMT1
Q9BQ61	128	K	1.539	0.00773478	Up	TRIR
Q9BQ61	146	K	2.107	0.00811495	Up	TRIR
Q9BQ69	297	K	2.306	0.00157643	Up	MACROD1
Q9BQP7	253	K	1.569	0.00540111	Up	MGME1
Q9BRD0	427	K	0.53	0.0141382	Down	BUD13
Q9BRD0	297	K	1.555	0.0221297	Up	BUD13
Q9BRD0	47	K	1.69	0.0120196	Up	BUD13
Q9BRU9	74	K	1.969	0.00100257	Up	UTP23
Q9BSJ8	817	K	0.576	0.00353449	Down	ESYT1
Q9BST9	216	K	1.607	0.0479935	Up	RTKN
Q9BUJ2	539	K	2.101	0.0155528	Up	HNRNPUL1
Q9BUQ8	596	K	6.961	0.0346085	Up	DDX23
Q9BVP2	377	K	3.049	0.0203717	Up	GNL3
Q9BVP2	237	K	1.852	0.00471741	Up	GNL3
Q9BXP5	720	K	3.807	0.00997552	Up	SRRT
Q9BZZ5	454	K	1.935	0.015834	Up	API5
Q9C0J8	46	K	1.876	0.016414	Up	WDR33
Q9GZZ1	37	K	2.977	0.00471617	Up	NAA50
Q9H2P0	606	K	4.542	0.0071384	Up	ADNP
Q9H2U2	224	K	4.201	0.00253067	Up	PPA2
Q9H2U2	69	K	2.414	0.00595459	Up	PPA2
Q9H2U2	259	K	1.561	0.00972169	Up	PPA2
Q9H410	76	K	8.635	0.00343918	Up	DSN1
Q9H501	138	K	2.724	0.00412541	Up	ESF1
Q9H814	183	K	4.075	0.000151556	Up	PHAX
Q9H814	339	K	2.374	0.00678908	Up	PHAX
Q9H993	40	K	5.026	5.93933e-06	Up	ARMT1
Q9H9J2	99	K	1.718	0.0193582	Up	MRPL44
Q9H9P8	104	K	2.925	0.0250952	Up	L2HGDH
Q9H9P8	155	K	1.804	9.9919e-05	Up	L2HGDH
Q9HA77	198	K	1.553	0.0173913	Up	CARS2
Q9HA77	323	K	1.8	0.00657286	Up	CARS2
Q9HAB8	46	K	1.617	0.0140792	Up	PPCS
Q9HAF1	6	K	2.319	0.00489815	Up	MEAF6
Q9HAF1	74	K	0.601	0.00351919	Down	MEAF6
Q9HB07	40	K	2.581	0.0150857	Up	MYG1
Q9HCM4	350	K	1.705	0.0100743	Up	EPB41L5
Q9HD33	144	K	3.19	0.00423843	Up	MRPL47
Q9NPI1	12	K	2.684	0.0258616	Up	BRD7
Q9NR30	91	K	2.151	0.000716392	Up	DDX21
Q9NR30	18	K	2.791	0.000974637	Up	DDX21
Q9NRK6	265	K	2.225	0.000279163	Up	ABCB10
Q9NSE4	775	K	2.273	0.000580652	Up	IARS2
Q9NSE4	781	K	1.705	0.00116874	Up	IARS2
Q9NSE4	451	K	1.614	0.0038954	Up	IARS2
Q9NSE4	241	K	2.311	0.00209147	Up	IARS2
Q9NSE4	540	K	1.68	0.00258317	Up	IARS2
Q9NTX5	108	K	2.106	0.0019122	Up	ECHDC1
Q9NUJ1	101	K	1.741	0.0218597	Up	ABHD10
Q9NUJ1	69	K	2.447	0.031559	Up	ABHD10
Q9NVI7	539	K	2.427	0.00262241	Up	ATAD3A
Q9NVP1	458	K	5.419	0.0468826	Up	DDX18
Q9NVS2	45	K	1.673	0.00570171	Up	MRPS18A
Q9NX58	14	K	1.554	0.0337241	Up	LYAR
Q9NXE4	500	K	1.977	0.0260438	Up	SMPD4
Q9NXF1	36	K	2.481	0.0449301	Up	TEX10
Q9NXH9	570	K	2.291	0.0022272	Up	TRMT1
Q9NXV6	149	K	2.517	0.0050181	Up	CDKN2AIP
Q9NY27	246	K	1.506	0.0362827	Up	PPP4R2
Q9NYF8	580	K	2.331	0.0231465	Up	BCLAF1
Q9NYF8	599	K	3.409	0.0359652	Up	BCLAF1
Q9NYF8	891	K	2.197	0.0230592	Up	BCLAF1
Q9NYP7	199	K	1.771	0.00402155	Up	ELOVL5
Q9P013	18	K	1.819	0.0169807	Up	CWC15
Q9P0L0	125	K	1.7	0.0070212	Up	VAPA
Q9P1Y6	768	K	2.047	0.0482892	Up	PHRF1
Q9P258	77	K	2.126	0.00803245	Up	RCC2
Q9P2E9	932	K	1.984	0.00101671	Up	RRBP1
Q9P2I0	680	K	2.554	0.00618877	Up	CPSF2
Q9P2N5	805	K	1.618	0.0147588	Up	RBM27
Q9UBE0	195	K	2.656	0.000132967	Up	SAE1
Q9UBL3	294	K	0.557	0.00495468	Down	ASH2L
Q9UBT2	623	K	2.506	0.00590874	Up	UBA2
Q9UDY2	1113	K	0.624	0.00684787	Down	TJP2
Q9UFN0	166	K	2.03	5.33425e-05	Up	NIPSNAP3A
Q9UHV7	366	K	2.252	0.0130027	Up	MED13
Q9UHX1	454	K	2.258	0.00298362	Up	PUF60
Q9UHX1	80	K	2.269	0.0383812	Up	PUF60
Q9UIF9	799	K	1.513	0.00695353	Up	BAZ2A
Q9UIJ7	20	K	2.492	0.000208563	Up	AK3
Q9UJZ1	145	K	4.029	0.0168049	Up	STOML2
Q9UKK9	42	K	1.525	0.00514626	Up	NUDT5
Q9UKV3	861	K	2.45	0.00551385	Up	ACIN1
Q9UKV3	103	K	1.867	0.048766	Up	ACIN1
Q9UKV3	717	K	1.532	0.0384798	Up	ACIN1
Q9ULL5	618	K	2.328	0.0176532	Up	PRR12
Q9ULM3	906	K	1.762	0.0106044	Up	YEATS2
Q9ULM3	100	K	1.557	0.0268295	Up	YEATS2
Q9ULU4	286	K	0.586	0.038998	Down	ZMYND8
Q9ULX6	411	K	1.988	0.000428535	Up	AKAP8L
Q9UMS4	192	K	2.112	0.00658205	Up	PRPF19
Q9UNP9	108	K	1.87	0.0209675	Up	PPIE
Q9UNX4	5	K	0.526	0.00019481	Down	WDR3
Q9UPN9	953	K	2.147	0.00572999	Up	TRIM33
Q9UPN9	527	K	0.484	0.00131994	Down	TRIM33
Q9UPT9	59	K	0.325	0.00117232	Down	USP22
Q9UQE7	106	K	1.666	0.0441934	Up	SMC3
Q9Y230	427	K	1.613	0.00388746	Up	RUVBL2
Q9Y265	2	K	2.959	0.000516059	Up	RUVBL1
Q9Y266	196	K	1.502	0.00273636	Up	NUDC
Q9Y277	12	K	3.072	0.0158299	Up	VDAC3
Q9Y2Q3	54	K	2.203	0.000658814	Up	GSTK1
Q9Y2R9	81	K	1.63	0.0100225	Up	MRPS7
Q9Y2R9	208	K	3.41	0.00319655	Up	MRPS7
Q9Y2S7	223	K	1.581	0.00925472	Up	POLDIP2
Q9Y2W1	346	K	1.611	0.00669153	Up	THRAP3
Q9Y2W1	375	K	1.931	0.00831483	Up	THRAP3
Q9Y2W1	420	K	1.657	0.000651676	Up	THRAP3
Q9Y2W1	470	K	1.782	0.0036288	Up	THRAP3
Q9Y2W2	316	K	1.712	0.00803392	Up	WBP11
Q9Y2Z4	355	K	1.728	0.00269862	Up	YARS2
Q9Y305	294	K	1.603	0.000348752	Up	ACOT9
Q9Y314	6	K	2.941	0.00184161	Up	NOSIP
Q9Y3B8	103	K	0.637	0.0172802	Down	REXO2
Q9Y3T9	649	K	2.112	0.0269983	Up	NOC2L
Q9Y4W6	488	K	2.046	0.00143441	Up	AFG3L2
Q9Y4W6	122	K	1.932	0.000451729	Up	AFG3L2
Q9Y520	392	K	0.217	0.0012501	Down	PRRC2C
Q9Y570	6	K	1.632	0.0115763	Up	PPME1
Q9Y5B6	250	K	2.291	0.000624127	Up	PAXBP1
Q9Y5K5	158	K	9.622	0.0034508	Up	UCHL5
Q9Y617	333	K	1.832	0.0379228	Up	PSAT1
Q9Y6A4	27	K	1.819	0.00999873	Up	CFAP20
Q9Y6G9	428	K	1.973	0.0443222	Up	DYNC1LI1
