# Supplementary material for: KAT8-catalyzed lactylation contributes to eEF1A2-mediated protein synthesis and colorectal carcinogenesis
Source: Research Square preprint supplement (doi:10.21203/rs.3.rs-2177254/v1), 2022-11-01
Supplement: Supplementary file 2 [file 2b3d5f7a7248db71da065c06.xlsx]

## Sheet: Table S1
Table S5	Sequences of shRNAs of eEF1A1, eEF1A2 and KAT8.
Oligonucleotides of target gene	Sequences
human shEEF1A1 top strand	5’-CCGGCCTCTCCAGGATGTCTACAAACTCGAGTTTGTAGACATCCTGGAGAGGTTTTTG-3’
human shEEF1A1 bottom strand	5’-AATTCAAAAACCTCTCCAGGATGTCTACAAACTCGAGTTTGTAGACATCCTGGAGAGG-3’
human shEEF1A2 top strand	5’-CCGGCATCAAGAAGATCGGCTACAACTCGAGTTGTAGCCGATCTTCTTGATGTTTTTG-3’
human shEEF1A2 bottom strand	5’-AATTCAAAAACATCAAGAAGATCGGCTACAACTCGAGTTGTAGCCGATCTTCTTGATG-3’
human-shKAT8 1# top strand	5’-CCGGGCAAGCATGATGAGATCAACCCTCGAGGGTTGATCTCATCATGCTTGCTTTTTG-3’
human-shKAT8 1# bottom strand	5’-AATTCAAAAAGCAAGCATGATGAGATCAACCCTCGAGGGTTGATCTCATCATGCTTGC-3’
human-shKAT8 2# top strand	5’-CCGGGCAAGATCACTCGCAACCAAACTCGAGTTTGGTTGCGAGTGATCTTGCTTTTTG-3’
human-shKAT8 2# bottom strand	5’-AATTCAAAAAGCAAGATCACTCGCAACCAAACTCGAGGCAAGATCACTCGCAACCAAA-3’
Non-Target shRNA top strand	5’- CCGGCCTAAGGTTAAGTCGCCCTCGCTCGAGCGAGGGCGACTTAACCTTAGGTTTTTG-3’
Non-Target shRNA bottom strand	5’-AATTCAAAAACCTAAGGTTAAGTCGCCCTCGCTCGAGCGAGGGCGACTTAACCTTAGG-3’
	Sequences of siRNAs of eEF1A1, eEF1A2
Oligonucleotides of target gene	Sequences
siEEF1A1 sense	5’-CCUCUCCAGGAUGUCUACAAA-3’
siEEF1A1 antisense	5’-UUUGUAGACAUCCUGGAGAGG-3’
siEEF1A2 sense	5’-CAUCAAGAAGAUCGGCUACAA-3’
siEEF1A2 antisense	5’-UUGUAGCCGAUCUUCUUGAUG-3’
