# Supplementary material for: KAT8-catalyzed lactylation contributes to eEF1A2-mediated protein synthesis and colorectal carcinogenesis
Source: Research Square preprint supplement (doi:10.21203/rs.3.rs-2177254/v1), 2022-11-01
Supplement: Supplementary file 2 [file 9a89cc8f5eb49fddfad75b70.pdf]

# Extended Data Fig. 1

a

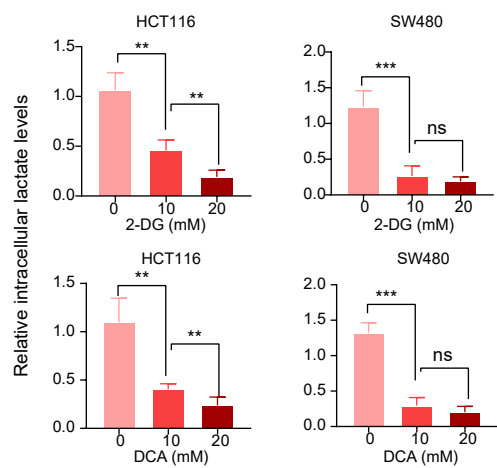

**Extended Data Fig. 1**

a. Intracellular lactate levels were measured from HCT116 and SW480 treating with 2DG and DCA cultured in different concentrations of 2DG or DCA for 24 h by a lactate colorimetric kit. (the data are represented as the means  $\pm$  SEM,  $**p < 0.01$ ,  $***p < 0.001$ ; unpaired, two-tailed Student's t test)

# Extended Data Fig. 2

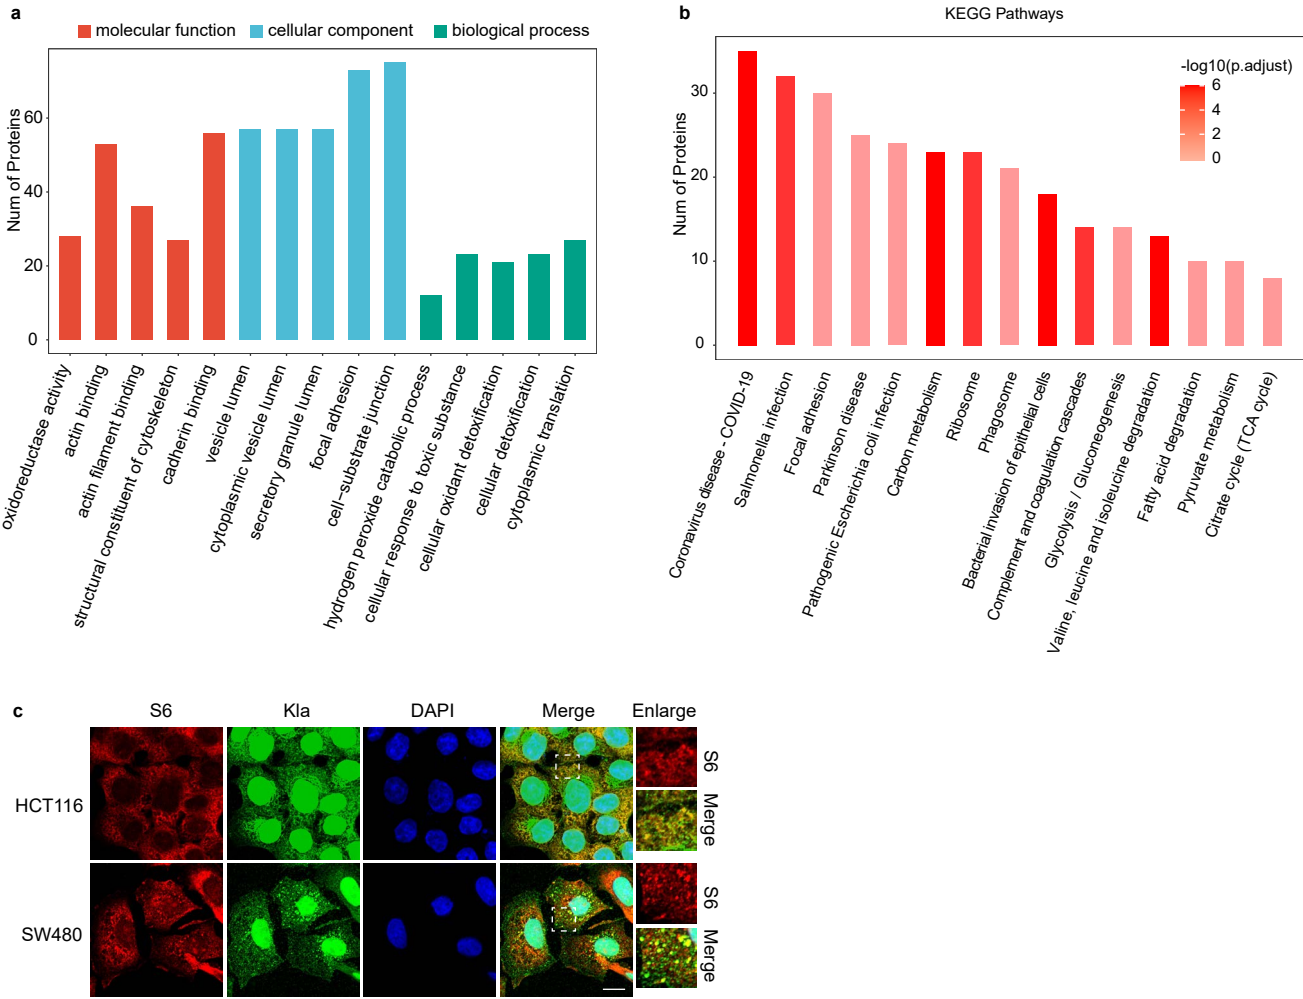

**Extended Data Fig. 2**

- a. Gene ontology analysis associated with K1a proteins. *P* values are derived from one-sided Fisher's exact test.
- b. KEGG pathway analysis of K1a proteins. *P* values are derived from empirical distribution test.
- c. Representative IF staining for K1a and S6 ribosomal protein in HCT116 and SW480 cells. Scale bars, 10  $\mu\text{m}$ .

# Extended Data Fig. 3

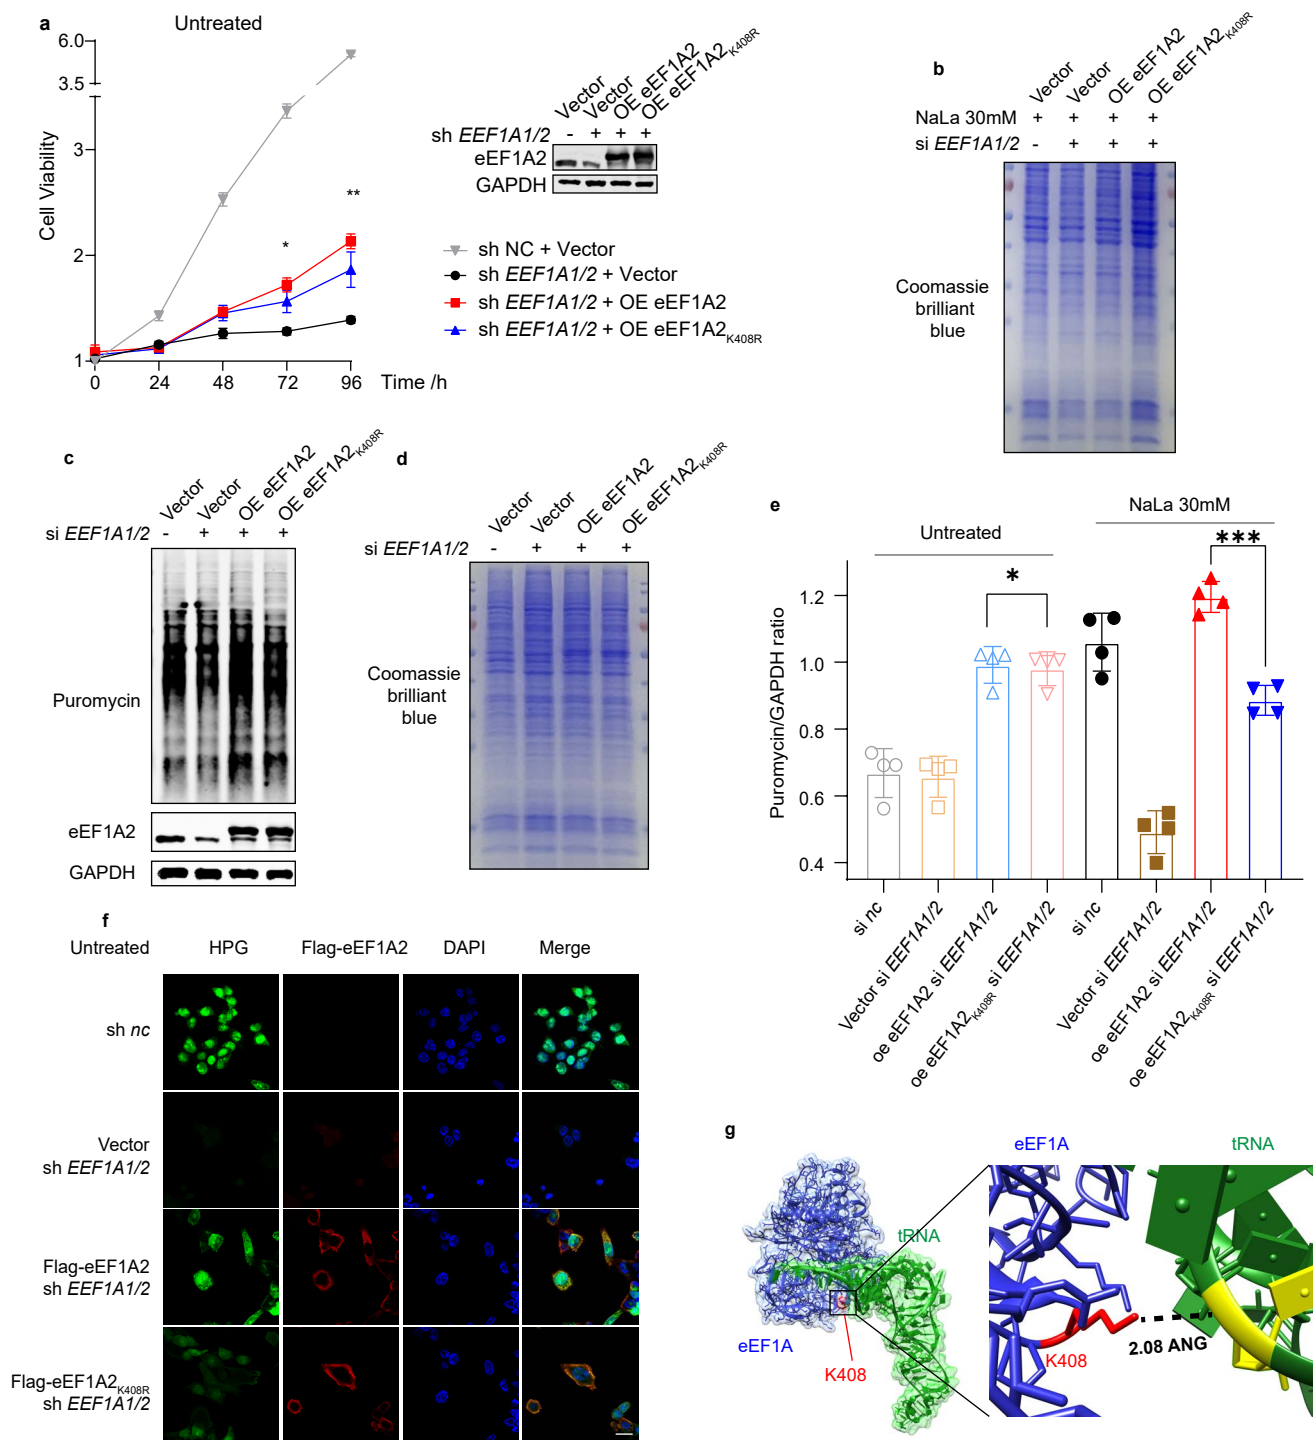

### Extended Data Fig. 3

- a. Cell proliferations of control or eEF1A1/2-depleted HCT116 cells complemented with WT eEF1A2, eEF1A2K408R, or control were measured with Incucyte cell count proliferation assay.
- b. Coomassie stain of proteins in the SUnSET reaction in the presence of NaLa.
- c. SUnSET assays under the indicated conditions reveal different levels of protein production in eEF1A1/2-depleted HCT116 cells complemented with WT eEF1A2, eEF1A2K408R, or control. WCEs were isolated and probed the indicated antibodies.
- d. Coomassie stain of proteins in the SUnSET reaction in the absence of NaLa.
- e. Mean gray value analyzed according to immunoblotting results from SUnSET assays of indicated genotype. (The data are represented as the means  $\pm$  SEM,  $*p < 0.05$ ,  $***p < 0.001$ ; unpaired, two-tailed Student's *t* test)
- f. HPG incorporation assay in HCT116 cells of the indicated genotype. Scale bar, 20  $\mu$ m
- g. Cryo-EM structures of eEF1A and tRNA in eukaryotic translational decoding complexes (PDB:5lzs)

# Extended Data Fig. 4

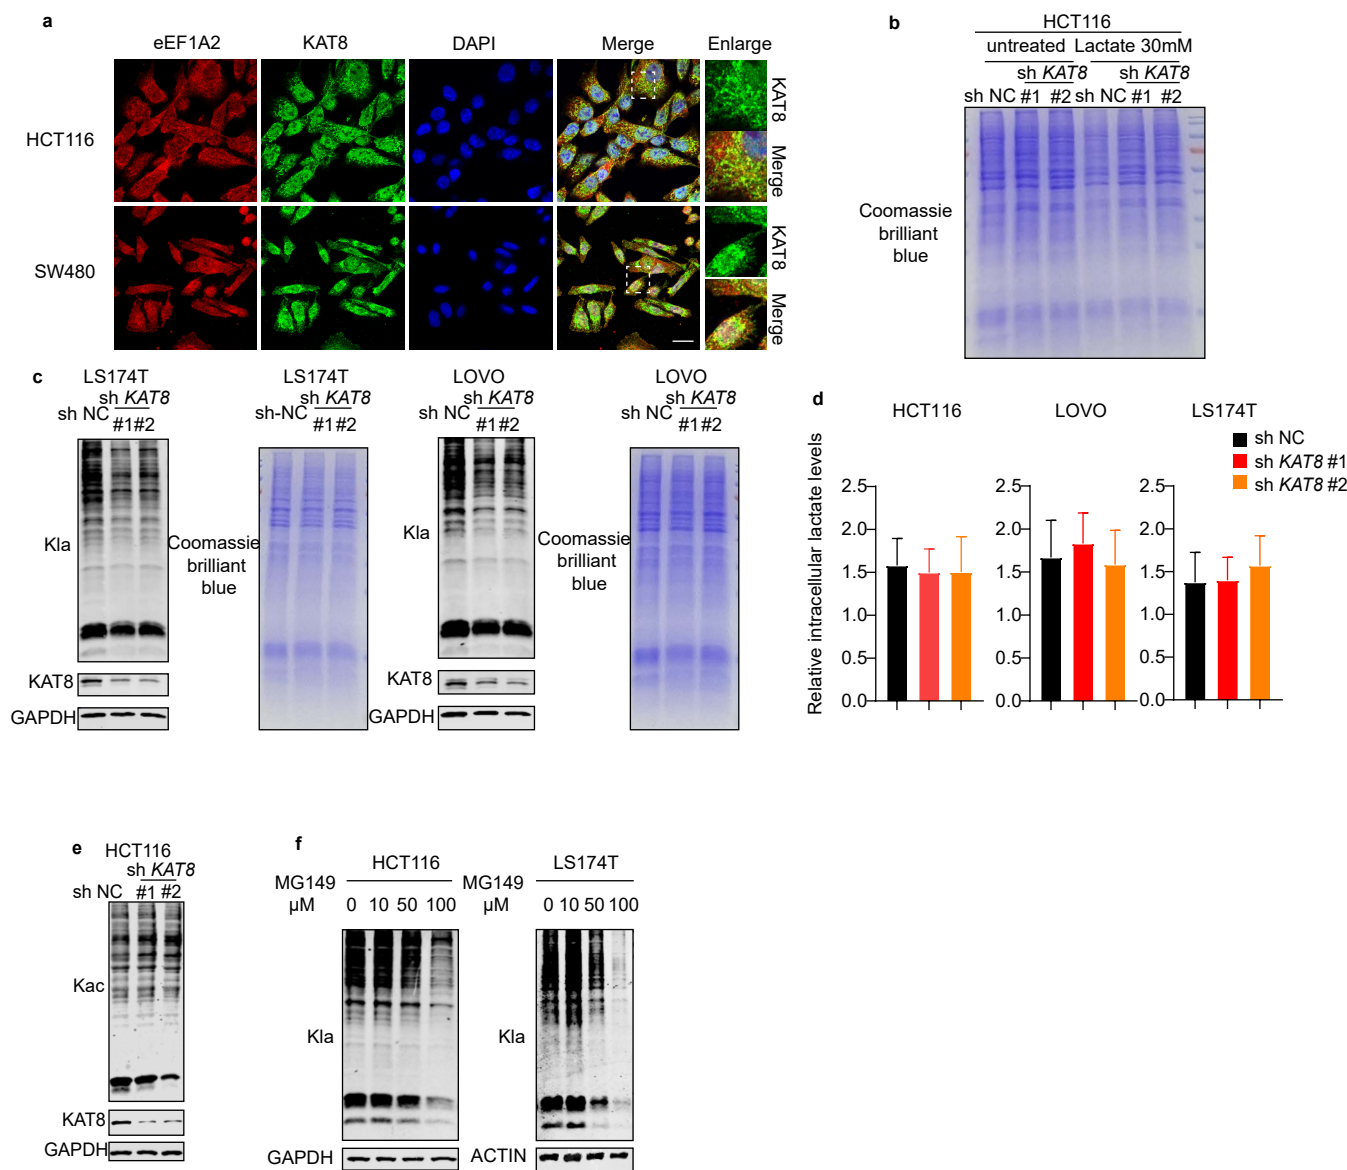

#### **Extended Data Fig. 4**

- a. The level and cellular location of eEF1A2 and KAT8 were detected in HCT116 and SW480 cells were detected by immunofluorescence staining with indicated antibodies. Scale bar: 20 $\mu$ m;
- b. Coomassie stain of proteins in the reaction Fig.4c.
- c. K1a levels were detected in LS174T and LOVO cells transfected with two independent shRNAs targetingKAT8 or a control shRNA by immunoblotting.
- d. Intracellular lactate levels were measured from HCT116 transfected with two independent shRNAs targetingKAT8 or a control shRNA by a lactate colorimetric kit. (the data are represented as the means $\pm$ SEM, \*\* $p < 0.01$ , \*\*\* $p < 0.001$ ; unpaired, two-tailed Student's t test)
- e. Kac levels were detected in HCT116 cells transfected with two independent shRNAs targetingKAT8 or a control shRNA by immunoblotting.
- f. K1a levels were detected in HCT116 and LS174T cells treating with different concentrations of MG149 for 24h by immunoblotting.
- g. SUnSET assays under the indicated conditions in the presence of Nala reveal different levels of protein production in eEF1A1/2-depleted HCT116 cells complemented with WT eEF1A2, eEF1A2K408R, or control. WCEs were isolated and probed the indicated antibodies. Coomassie stain of proteins in the SUnSET reaction was shown.



# Extended Data Fig. 5

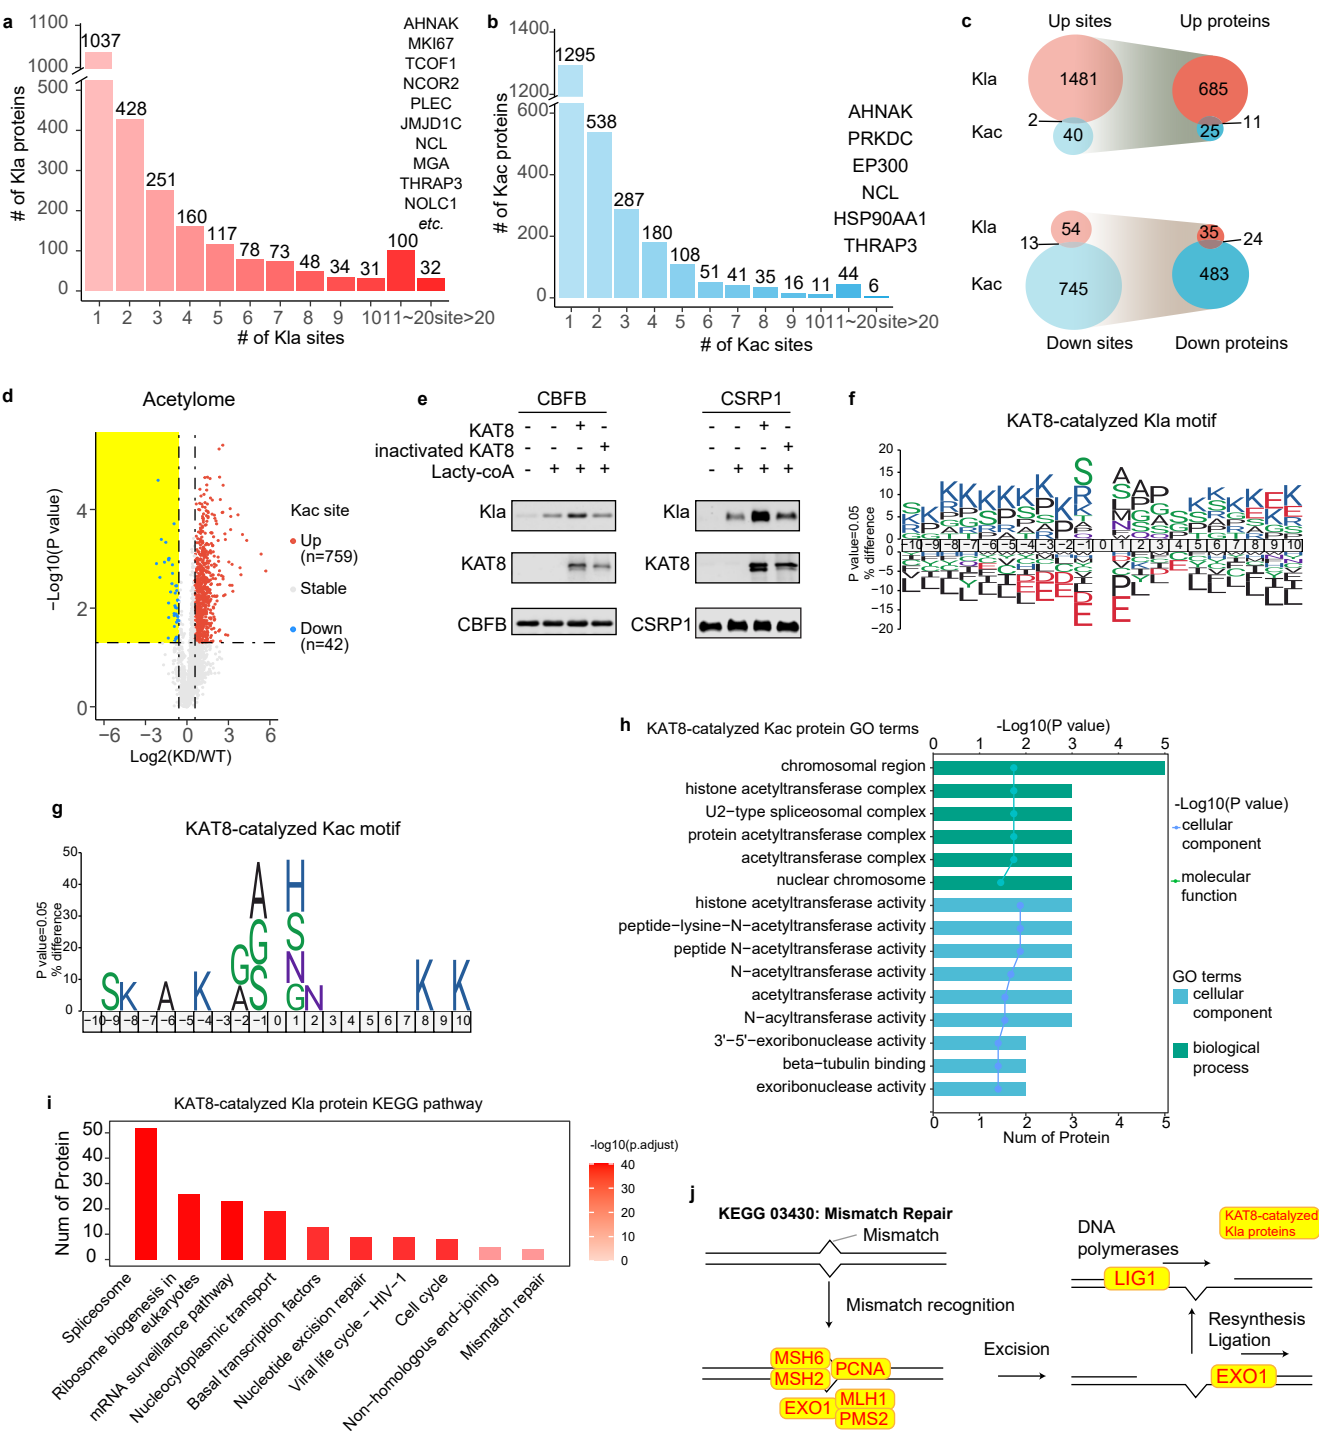

### Extended Data Fig. 5

- a. Volcano plot showing the global acetylome changes in cells knockdown KAT8 (KD) vs. control cells (WT). Individual sites are represented by points.
- b. Histogram of the number of all K<sub>la</sub> sites per protein. Proteins with more than 20 sites of K<sub>la</sub> are listed above the corresponding bar.
- c. Histogram of the number of all K<sub>ac</sub> sites per protein. Proteins with more than 20 sites of K<sub>la</sub> are listed above the corresponding bar.
- d. The number of up-regulated(top) and down-regulated(bottom) K<sub>la</sub>(red) and K<sub>ac</sub>(blue) sites and proteins.
- e. *In vitro* CBFB and CSRP1 lactylation assay. Purified CBFB and CSRP1 or from *E. coli* was incubated with recombinant KAT8 in the presence or absence of lactyl-CoA. CBFB and CSRP1 lactylation were analyzed by immunoblotting with indicated antibodies.
- f. Icelogo representation showing flanking sequence preferences for KAT8-catalyzed K<sub>la</sub> sites.
- g. Icelogo representation showing flanking sequence preferences for KAT8-catalyzed K<sub>ac</sub> sites.
- h. Gene ontology analysis associated with KAT8-catalyzed K<sub>ac</sub> proteins. *P* values are derived from one-sided Fisher's exact test.
- i. KEGG pathway analysis of KAT8-catalyzed K<sub>la</sub> proteins. *P* values are derived from empirical distribution test.
- j. Schematic of KAT8-catalyzed K<sub>la</sub> proteins (yellow box and red font) and K<sub>la</sub> proteins (yellow box) associated with mismatch repair (KEGG:03430).

# Extended Data Fig. 6

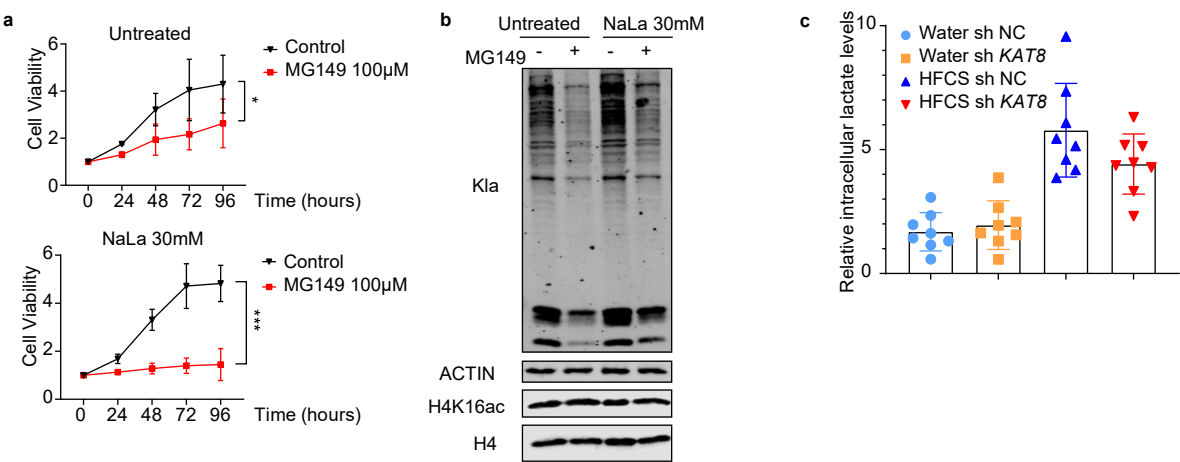

### **Extended Data Fig. 6**

- a. Cell proliferations of HCT116 cells treated with MG149 in the presence or absence of 30mM NaLa were measured with Incucyte cell count proliferation assay. (\*\*\* $p < 0.001$ , two-way ANOVA)
- b. K1a and H4K16ac levels were detected in HCT116 cells treated with MG149 in the presence or absence of 30mM NaLa by immunoblotting.
- c. Intracellular lactate levels were measured from control or KAT8 KD HCT116 cells in high-lactate conditions or normal conditions for 24 h by a lactate colorimetric kit. (the data are represented as the means  $\pm$  SEM, \* $p < 0.05$ ; unpaired, two-tailed Student's t test)
