# Supplementary material for: KAT8-catalyzed lactylation contributes to eEF1A2-mediated protein synthesis and colorectal carcinogenesis
Source: Research Square preprint supplement (doi:10.21203/rs.3.rs-2177254/v1), 2022-11-01
Supplement: Supplementary file 3 [file 4f263379917f42c057d3bdc7.xlsx]

## Sheet: Sheet1
Table S1	List of CRC cohort lactylation level scores
Patient No.	Sex(Female=0,Male=1)	Age	T Stage	Time for recurrence (month, 0=No recurrence)	Relative lactylation level
1	1	38	1	8	1.224
2	0	42	3	0	0.778
3	1	50	1	40	0.352
4	1	19	2	0	0.354
5	1	68	3	8	1.365
6	1	62	3	0	1.452
7	0	65	3	0	0.688
8	0	78	4	6	0.897
9	0	79	3	15	1.954
10	1	55	3	0	0.752
11	1	66	3	20	0.625
12	1	67	2	0	0.183
13	1	24	2	0	0.795
14	1	65	4	4	2.465
15	1	66	4	8	1.123
16	1	69	3	4	0.268
17	1	72	3	7	1.124
18	1	72	3	0	0.987
19	1	75	3	0	0.952
20	0	75	3	15	2.123
21	0	48	2	23	0.764
22	1	46	2	0	0.648
23	0	50	2	0	1.324
24	0	50	2	18	0.994
25	1	53	3	0	0.877
26	0	68	2	3	5.142
27	0	64	2	0	0.698
28	1	69	2	0	1.586
29	0	76	3	0	1.254
30	0	78	3	8	0.648
31	0	85	3	6	1.084
32	1	71	3	13	0.662
33	1	69	3	0	1.879
34	1	69	3	1	2.546
35	0	54	3	0	1.246
36	0	56	3	36	0.325
37	1	58	3	2	3.685
38	0	31	1	0	0.089
39	1	42	2	0	4.257
40	0	35	2	0	0.248
41	1	78	4	5	3.778
42	1	76	3	3	4.256
43	0	78	2	2	2.546
44	0	66	2	0	1.687
45	1	62	2	6	5.553
46	1	69	3	0	4.267
47	0	82	3	6	4.235
48	0	85	3	48	0.448
49	0	71	3	12	0.875
50	1	74	2	15	1.876
51	1	35	3	0	0.664
52	0	80	2	8	0.486
53	1	38	2	36	1.245
54	0	24	2	25	1.035
55	1	57	3	48	3.2
56	0	68	1	6	0.998
57	1	76	3	9	2.4
58	1	52	3	60	1.332
59	1	72	2		0.998
60	1	46	2		0.546
