# Supplementary material for: KAT8-catalyzed lactylation contributes to eEF1A2-mediated protein synthesis and colorectal carcinogenesis
Source: Research Square preprint supplement (doi:10.21203/rs.3.rs-2177254/v1), 2022-11-01
Supplement: Supplementary file 4 [file 58408dad7651a5ec34bb2725.xlsx]

## Sheet: Sheet1
Table S2	List of the identified Kla sites in CRC patient samples
Protein accession	Position	Amino acid	log2(Tumor/Para Ratio)	Tumor/Para P value	Gene name
A0A024RAI1	240	K	-1.13674	0.000601524	ACTR3
P02790	402	K	-0.947164	0.000619877	HPX
P00441	10	K	-0.992505	0.000993009	SOD1
Q15746	1330	K	-0.714286	0.00132209	MYLK
Q9Y6R7	1476	K	-0.876451	0.00153203	FCGBP
Q9UGI8	163	K	0.792885	0.00159465	TES
A0A2R8Y4A6	225	K	-0.797852	0.00164909	SLC4A11
Q05639	408	K	1.97319	0.0023919	EEF1A2
A0A140VK94	134	K	-0.849648	0.00250847	RANBP1
P00326	136	K	-0.861178	0.00580385	ADH1C
P00738	270	K	-0.910314	0.00636953	HP
H0YJS3	529	K	0.931296	0.00835188	FANCM
G3V357	29	K	-0.81716	0.00837831	RNASE1
P01008	268	K	0.853897	0.0085942	SERPINC1
Q6VFQ6	16	K	0.892173	0.0093313	HBB
Q5TZP7	103	K	0.733594	0.00958378	APEX1
Q02218	564	K	0.738561	0.0102859	OGDH
M0R0Q9	4	K	-0.571429	0.0105067	C3
X6RJP6	57	K	0.571429	0.0105067	TAGLN2
P60981	53	K	0.738561	0.0123465	DSTN
O14936	20	K	0.733594	0.0123983	CASK
P27708	1875	K	0.733594	0.0123983	CAD
P00325	105	K	-0.773116	0.0197792	ADH1B
P13639	648	K	0.67752	0.0240819	EEF2
V9HWH7	569	K	0.915461	0.0253288	HEL-S-70p
A0A024RAM1	164	K	-0.796145	0.0327567	POLR3G
F6IR49	210	K	0.922845	0.0364783	HLA-A
Q71DI3	116	K	-0.590737	0.0368545	H3C15
A0A024RAJ8	578	K	-0.590737	0.0393245	IQGAP2
F5H5D3	374	K	0.507171	0.0448812	TUBA1C
B2ZZ89	602	K	0.512138	0.0452209	SPTBN1
E5KNY5	1037	K	0.512138	0.0452209	LRPPRC
P58546	4	K	0.428571	0.0454326	MTPN
Q6P161	57	K	0.428571	0.0454326	MRPL54
A0A087X0X3	698	K	0.428571	0.0454326	HNRNPM
P62937	118	K	0.428571	0.0454326	PPIA
P35244	23	K	0.428571	0.0454326	RPA3
J3KRX5	153	K	0.428571	0.0454326	RPL17
Q9BRT3	47	K	0.428571	0.0454326	MIEN1
P32969	141	K	0.428571	0.0454326	RPL9
P13798	291	K	0.428571	0.0454326	APEH
P62917	92	K	0.428571	0.0454326	RPL8
P21397	267	K	-0.428571	0.0454326	MAOA
Q5XLT0	405	K	-0.428571	0.0454326	RHD
E9PKZ0	92	K	-0.428571	0.0454326	RPL8
P00738	345	K	-0.428571	0.0454326	HP
Q09666	1971	K	-0.428571	0.0454326	AHNAK
P0CG39	878	K	-0.428571	0.0454326	POTEJ
G3V0I5	219	K	-0.428571	0.0454326	NDUFV1
P16422	106	K	-0.428571	0.0454326	EPCAM
P00326	136	K	-0.428571	0.0454326	ADH1C
P27348	103	K	-0.428571	0.0454326	YWHAQ
P02768	130	K	-1.18473	0.0455041	ALB
O60701	6	K	-0.521725	0.0459602	UGDH
V9HWB5	253	K	-0.552153	0.0489189	HEL-S-66p
A0A090N7V5	7	K	0.660784	0.0492583	C7orf24
V9HWN7	230	K	0.726099	0.0519748	HEL-S-87p
D5L9B5	126	K	0.582184	0.052532	HLA-A
Q6N091	454	K	-0.835434	0.0584958	DKFZp686C02220
Q71U36	352	K	-0.714319	0.063025	TUBA1A
Q96HE7	244	K	0.512138	0.066298	ERO1A
Q4JLR8	27	K	0.512138	0.066298	HBB
D4QEZ8	148	K	-0.659281	0.0720163	ACADS
Q7Z379	432	K	-0.66324	0.0802851	DKFZp686K04218
P50395	418	K	0.428571	0.0833335	GDI2
Q14651	380	K	0.428571	0.0833335	PLS1
P10586	204	K	0.428571	0.0833335	PTPRF
Q09666	2257	K	-0.428571	0.0833335	AHNAK
Q05CP7	78	K	-0.428571	0.0833335	FABP1
Q13162	240	K	-0.487862	0.0863616	PRDX4
Q6J1Z9	65	K	0.636009	0.0906547	HBA1
V9HWE9	45	K	0.428571	0.0961926	HEL-S-22
Q6PIL8	148	K	-0.892983	0.096435	IGK@
P02768	223	K	0.502725	0.107406	ALB
P68133	240	K	-0.496864	0.107428	ACTA1
A0A0A0MS07	218	K	-0.526357	0.107778	IGHG1
P29144	715	K	0.452846	0.109558	TPP2
Q12864	32	K	-0.452846	0.109558	CDH17
V9HWH7	331	K	0.452846	0.109558	HEL-S-70p
O75369	2342	K	0.573716	0.109844	FLNB
L7RRS0	11	K	0.44788	0.110068	PIK3C2A
V9HWG7	511	K	0.44788	0.110068	HEL-S-52
Q6IAV3	66	K	0.44788	0.110068	SUI1
P02533	15	K	-0.44788	0.110068	KRT14
P78527	4070	K	0.512138	0.117839	PRKDC
A0A024QZN7	68	K	-0.512138	0.117839	C10orf70
O75369	1519	K	0.502725	0.120583	FLNB
P68366	60	K	0.578089	0.125421	TUBA4A
Q9NVZ3	13	K	0.502725	0.129899	NECAP2
P60981	44	K	0.364314	0.130381	DSTN
P62937	118	K	0.364314	0.130381	PPIA
O15145	165	K	0.364314	0.130381	ARPC3
Q15819	72	K	-0.364314	0.130381	UBE2V2
Q02218	561	K	-0.364314	0.130381	OGDH
A0A1W2PRL5	14	K	0.36928	0.130409	NECAP1
Q7Z3K6	262	K	0.36928	0.130409	MIER3
Q15393	929	K	0.36928	0.130409	SF3B3
X6RJP6	57	K	0.36928	0.130409	TAGLN2
P02760	100	K	-0.36928	0.130409	AMBP
P07858	220	K	0.36928	0.130409	CTSB
A0A024RDR0	128	K	0.36928	0.130409	HMGB1
A4D2D2	305	K	0.36928	0.130409	PCOLCE
D6RF35	30	K	-0.36928	0.130409	GC
Q4JLR8	27	K	0.36928	0.130409	HBB
Q14566	241	K	0.36928	0.130409	MCM6
B2R6F3	11	K	0.36928	0.130409	SFRS3
P00326	105	K	-0.36928	0.130409	ADH1C
V9HWK1	219	K	0.36928	0.130409	HEL-S-49
Q15819	66	K	0.36928	0.130409	UBE2V2
A0A0K0K1K4	61	K	-0.36928	0.130409	HEL-S-276
Q96NH3	443	K	-0.36928	0.130409	TBC1D32
Q96ME7	541	K	0.36928	0.130409	ZNF512
Q02338	122	K	0.36928	0.130409	BDH1
P04406	251	K	0.36928	0.130409	GAPDH
Q9Y6R7	1476	K	-0.378868	0.130606	FCGBP
B3GQS7	389	K	-0.409296	0.132209	HSPD1
Q16577	209	K	0.608765	0.134229	PTI-1
Q86XT2	167	K	-0.459288	0.136813	VPS37D
V9HWK1	85	K	0.414745	0.137659	HEL-S-49
Q9Y6R7	349	K	-0.452846	0.140824	FCGBP
Q01081	15	K	-0.285714	0.141675	U2AF1
P00338	5	K	0.285714	0.141675	LDHA
A0A024R7Y5	6	K	0.285714	0.141675	TCEB1
A0A1S5UZ39	17	K	0.285714	0.141675	HBA2
V9HW98	215	K	0.285714	0.141675	HEL2
Q96L21	42	K	0.285714	0.141675	RPL10L
Q14651	143	K	-0.285714	0.141675	PLS1
Q9Y3F4	156	K	0.285714	0.141675	STRAP
P01023	912	K	0.285714	0.141675	A2M
P62280	59	K	-0.285714	0.141675	RPS11
A0A5F9ZH83	71	K	-0.285714	0.141675	ADK
Q09666	3048	K	0.285714	0.141675	AHNAK
Q9Y678	733	K	-0.285714	0.141675	COPG1
A0A024R2B6	321	K	0.285714	0.141675	SERPINB5
P15924	959	K	-0.285714	0.141675	DSP
Q13404	74	K	-0.285714	0.141675	UBE2V1
O00571	342	K	0.285714	0.141675	DDX3X
P63096	67	K	-0.285714	0.141675	GNAI1
B2R491	174	K	0.285714	0.141675	RPS4X
E7EWP2	1160	K	-0.285714	0.141675	TRIO
Q06830	68	K	0.285714	0.141675	PRDX1
Q9Y2Q0	704	K	-0.285714	0.141675	ATP8A1
Q6ZNA4	913	K	-0.285714	0.141675	RNF111
O00299	79	K	0.285714	0.141675	CLIC1
P30041	84	K	0.285714	0.141675	PRDX6
A0A024R3W7	197	K	0.285714	0.141675	EEF1B2
R4SBI6	196	K	-0.285714	0.141675	EPHX1
A0A0A0MR82	117	K	0.285714	0.141675	TMPRSS11A
P10599	36	K	0.285714	0.141675	TXN
P49327	2471	K	0.285714	0.141675	FASN
Q5HYL4	243	K	0.285714	0.141675	DKFZp686E1893
Q15819	72	K	0.285714	0.141675	UBE2V2
Q3LR79	96	K	0.285714	0.141675	HBB
Q96IR1	154	K	-0.285714	0.141675	RPS4X
A0A0A0MSS8	185	K	0.285714	0.141675	AKR1C3
O60547	338	K	0.285714	0.141675	GMDS
Q4JM47	108	K	-0.285714	0.141675	AGR2
A0A0S2Z4I4	153	K	0.285714	0.141675	TPM3
A0A1C3PI74	90	K	-0.285714	0.141675	HLA-C
Q9UKK3	381	K	0.285714	0.141675	PARP4
O75369	2058	K	-0.285714	0.141675	FLNB
A0A5H2UG24	267	K	-0.285714	0.141675	HLA-C
A6NKZ2	230	K	-0.285714	0.141675	RENBP
Q13242	144	K	0.285714	0.141675	SRSF9
X6RJP6	57	K	0.285714	0.141675	TAGLN2
R4SBI6	306	K	-0.285714	0.141675	EPHX1
Q14204	2601	K	-0.285714	0.141675	DYNC1H1
P51911	55	K	0.285714	0.141675	CNN1
A0A024R8S5	309	K	0.285714	0.141675	P4HB
Q1KMD3	58	K	0.285714	0.141675	HNRNPUL2
P01833	231	K	-0.285714	0.141675	PIGR
O60522	826	K	-0.285714	0.141675	TDRD6
V9HW98	94	K	0.285714	0.141675	HEL2
J9JIG6	120	K	0.285714	0.141675	ARSG
Q06830	168	K	-0.285714	0.141675	PRDX1
P46952	282	K	-0.285714	0.141675	HAAO
I3L522	375	K	0.285714	0.141675	NDE1
Q6IBM8	561	K	-0.285714	0.141675	U5-116KD
Q9H4A4	260	K	0.285714	0.141675	RNPEP
P61626	87	K	0.285714	0.141675	LYZ
P02768	341	K	-0.61579	0.147342	ALB
Q6FHU2	157	K	0.44788	0.151725	PGAM1
Q2TU34	101	K	-0.442913	0.153824	FBP1
Q13162	250	K	-0.541601	0.163296	PRDX4
P21333	2000	K	-0.635011	0.163734	FLNA
E5RI99	87	K	0.428571	0.172401	RPL30
A0A1S5UZ39	8	K	-0.846807	0.173439	HBA2
A0A0D9SGF6	1313	K	-0.57618	0.179947	SPTAN1
P05023	377	K	0.740626	0.181712	ATP1A1
D3DPU2	412	K	0.566982	0.183216	CAP1
Q9Y394	321	K	0.36928	0.183409	DHRS7
P31937	76	K	0.36928	0.183409	HIBADH
P21333	1019	K	0.453111	0.184688	FLNA
P20700	111	K	-0.364314	0.185259	LMNB1
A0A678ZP39	210	K	0.364314	0.185259	HLA-B
A0A4W9A917	206	K	-0.817718	0.189157	IGHG3
P21333	2165	K	-0.53263	0.200093	FLNA
Q06210	640	K	-0.36928	0.203361	GFPT1
Q6FHU2	157	K	0.36928	0.203361	PGAM1
P02768	341	K	-0.887051	0.204048	ALB
A0A1S5UZ39	173	K	0.494395	0.226983	HBA2
Q02790	108	K	0.515648	0.235802	FKBP4
P41091	266	K	0.505865	0.235945	EIF2S3
P49755	50	K	0.285714	0.236374	TMED10
P01023	934	K	0.285714	0.236374	A2M
A0A087WV01	406	K	0.285714	0.236374	EEF1A1
A0A087WVQ6	834	K	0.285714	0.236374	CLTC
D6RCP9	23	K	-0.285714	0.236374	DCK
O60701	58	K	-0.285714	0.236374	UGDH
P27482	95	K	-0.285714	0.236374	CALML3
A0A1B0GWE8	285	K	0.388589	0.245694	CTSD
Q6ICQ4	27	K	0.440198	0.245795	RPLP1
Q6MZV7	173	K	-0.79151	0.245878	DKFZp686C11235
Q1KMD3	601	K	0.439327	0.252414	HNRNPUL2
A0A024RB75	208	K	-0.36928	0.256181	CS
A0A3B3ITJ4	423	K	0.495097	0.264747	HNRNPL
C8C504	67	K	0.5491	0.267421	HBB
Q562N0	1	K	0.536413	0.26788	ACT
A0A1S5UZ39	107	K	-0.516987	0.268646	HBA2
P63261	213	K	-0.502725	0.269264	ACTG1
Q9UP60	289	K	-0.496864	0.269534	SNC73
E9PKZ0	92	K	0.388589	0.270332	RPL8
V9HWB8	475	K	0.659844	0.270789	HEL-S-30
Q6MZQ6	398	K	0.44704	0.272252	DKFZp686G11190
A0A4P8DJR2	364	K	0.422976	0.273909	HLA-A
V9HW25	51	K	-0.42012	0.274123	HEL-S-273
P63261	50	K	-0.413298	0.274654	ACTG1
B4DR61	16	K	0.285714	0.274736	SEC61A1
O95865	267	K	0.285714	0.274736	DDAH2
O75369	2120	K	-0.285714	0.274736	FLNB
C8C504	145	K	-0.806139	0.281166	HBB
A0A0S2Z428	287	K	-0.31643	0.286026	KRT6A
P02768	205	K	0.309989	0.287153	ALB
P02768	65	K	0.309989	0.287153	ALB
Q53HQ7	273	K	0.309989	0.287153	EEF1A
P02768	97	K	-0.724323	0.288483	ALB
A0A0K0K1H8	509	K	-0.299934	0.289048	HEL-S-71p
Q01995	121	K	0.29647	0.289742	TAGLN
P05023	377	K	0.29647	0.289742	ATP1A1
Q3LAB5	100	K	0.29647	0.289742	HLA-DRB1
A0A0S2Z2Z6	113	K	0.482468	0.29079	ANXA6
P06732	266	K	0.285714	0.292048	CKM
Q9P2E9	932	K	0.285714	0.292048	RRBP1
P00738	151	K	0.282001	0.2929	HP
A0A087WTT1	308	K	-0.278219	0.293801	PABPC1
A0A0D9SGF6	168	K	-0.270441	0.295762	SPTAN1
P04899	331	K	-0.266439	0.296833	GNAI2
Q9UHD0	116	K	0.258194	0.299181	IL19
P68133	217	K	-0.253944	0.300472	ACTA1
A0A0J9YWL0	1924	K	-0.236011	0.306618	CRYBG1
Q8WUM4	234	K	-0.236011	0.306618	PDCD6IP
A0A481SHK9	121	K	-0.236011	0.306618	HBB
V9HWK1	33	K	-0.236011	0.306618	HEL-S-49
A0A1S5UZ39	173	K	0.846137	0.307058	HBA2
Q7Z3R8	26	K	0.226423	0.310441	DKFZp686D10173
H0YGE5	437	K	0.226423	0.310441	DENND5B
Q5JPE7	791	K	0.226423	0.310441	NOMO2
A0A0S2Z428	400	K	0.226423	0.310441	KRT6A
P02787	135	K	0.226423	0.310441	TF
B2RWM5	238	K	0.226423	0.310441	CNN2
A0A024RDQ0	134	K	0.226423	0.310441	HSPH1
P00326	114	K	0.226423	0.310441	ADH1C
Q8NHH9	406	K	0.226423	0.310441	ATL2
C0JYZ2	20721	K	0.226423	0.310441	TTN
Q4JM47	108	K	0.226423	0.310441	AGR2
O43187	94	K	0.226423	0.310441	IRAK2
Q15370	104	K	0.226423	0.310441	ELOB
V9HWH2	101	K	0.226423	0.310441	HEL-S-29
A0A2K4N859	364	K	0.226423	0.310441	HLA-A
P49327	2193	K	0.226423	0.310441	FASN
A0A6Q8PFJ0	341	K	0.226423	0.310441	LMNA
A0A0J9YYD2	21	K	0.226423	0.310441	ATP9B
O76021	100	K	0.226423	0.310441	RSL1D1
P06733	394	K	0.226423	0.310441	ENO1
P34897	409	K	0.226423	0.310441	SHMT2
Q6PXP3	162	K	0.226423	0.310441	SLC2A7
K9JA46	478	K	0.226423	0.310441	EL52
O14936	20	K	-0.226423	0.310441	CASK
P80365	256	K	-0.226423	0.310441	HSD11B2
D2JYH4	293	K	-0.226423	0.310441	ACTA2
P00325	169	K	-0.226423	0.310441	ADH1B
P21333	626	K	-0.226423	0.310441	FLNA
E7ESP9	685	K	-0.226423	0.310441	NEFM
A4D2P0	142	K	-0.226423	0.310441	RAC1
Q8NBJ5	470	K	-0.226423	0.310441	COLGALT1
F8VV59	94	K	-0.226423	0.310441	NAP1L1
A0A024R611	20	K	-0.226423	0.310441	CORO1A
P12532	58	K	-0.226423	0.310441	CKMT1A
Q71RC2	616	K	-0.226423	0.310441	LARP4
A0A0K0K1H8	278	K	-0.226423	0.310441	HEL-S-71p
P21333	2133	K	-0.226423	0.310441	FLNA
A0A494C1M4	569	K	-0.226423	0.310441	ALDH1L2
V9HWN7	243	K	-0.221457	0.312594	HEL-S-87p
Q13423	331	K	0.221457	0.312594	NNT
A0A024RDW8	275	K	0.221457	0.312594	COL4A2
V9HWB8	151	K	0.221457	0.312594	HEL-S-30
Q8IVG5	1331	K	0.221457	0.312594	SAMD9L
D5KMS0	147	K	0.221457	0.312594	CYP2D6
Q6RAS8	46	K	0.221457	0.312594	MCPH1
Q9UBQ0	30	K	-0.221457	0.312594	VPS29
O75874	301	K	0.221457	0.312594	IDH1
Q6N093	192	K	-0.221457	0.312594	DKFZp686I04196
Q4TZM4	79	K	-0.221457	0.312594	HBB
P49748	204	K	-0.221457	0.312594	ACADVL
Q9Y490	2168	K	0.221457	0.312594	TLN1
P02750	336	K	0.221457	0.312594	LRG1
P05023	535	K	-0.221457	0.312594	ATP1A1
A0A384N6C2	167	K	0.221457	0.312594	IMPDH
Q562L5	35	K	0.221457	0.312594	ACT
P35749	129	K	0.221457	0.312594	MYH11
A0A024R1A3	830	K	-0.221457	0.312594	UBE1
L8E737	57	K	0.221457	0.312594	U2SURP
A6NC98	1036	K	0.221457	0.312594	CCDC88B
P19823	93	K	0.221457	0.312594	ITIH2
A0A024R201	186	K	0.309989	0.328426	PSMD13
Q9H7U1	111	K	0.378865	0.333618	CCSER2
A0A140VJJ2	186	K	-0.305023	0.335186	ESD
V9HWJ7	165	K	-0.305023	0.335186	HEL-S-37
Q16568	74	K	-0.29647	0.344714	CARTPT
P01023	567	K	0.290681	0.350573	A2M
V9HW83	378	K	0.285714	0.351242	HEL-S-53e
B3GQS7	389	K	0.329265	0.360365	HSPD1
P02765	211	K	-0.290681	0.361275	AHSG
P62879	23	K	-0.266439	0.370152	GNB2
Q86YL2	74	K	0.285714	0.372826	HBA1
D9IAI1	132	K	-0.285714	0.372826	PEBP1
A0A3B3ITJ4	8	K	0.142857	0.373294	HNRNPL
Q7YP28	3	K	-0.142857	0.373294	HLA-C
H3BQ55	1	K	-0.142857	0.373294	METTL26
A0A6I8PU73	25	K	0.142857	0.373294	DNAJC7
E9PQY2	7	K	-0.142857	0.373294	PFDN4
P0DP25	14	K	-0.142857	0.373294	CALM3
F8WEU8	23	K	0.142857	0.373294	RNF7
P60866	8	K	0.142857	0.373294	RPS20
P07737	26	K	0.142857	0.373294	PFN1
V9HWH9	3	K	0.142857	0.373294	HEL-S-43
A0A024R608	27	K	0.142857	0.373294	RPLP1
A0A024R608	33	K	-0.142857	0.373294	RPLP1
D6RBC8	9	K	0.142857	0.373294	SPATA24
E7DVW4	10	K	-0.142857	0.373294	FABP4
C9JAV7	6	K	-0.142857	0.373294	INTS6
Q9H061	5	K	-0.142857	0.373294	TMEM126A
C9JJ68	19	K	-0.142857	0.373294	DHFR2
A0A590UJ55	2	K	-0.142857	0.373294	ITCH
V9HW01	2	K	0.142857	0.373294	HEL-S-310
Q8TAM1	12	K	-0.142857	0.373294	BBS10
Q9UL54	11	K	0.142857	0.373294	TAOK2
E9PS98	30	K	-0.142857	0.373294	ASAP3
P62249	4	K	0.142857	0.373294	RPS16
O75821	24	K	-0.142857	0.373294	EIF3G
Q5SVS4	7	K	0.142857	0.373294	SLC25A30
H3BUX2	16	K	0.142857	0.373294	CYB5B
Q16531	11	K	-0.142857	0.373294	DDB1
E9PIN8	7	K	0.142857	0.373294	TESPA1
A0A6Q8PFE4	7	K	0.142857	0.373294	ACTB
A0A140KFU0	18	K	0.142857	0.373294	hbb
A0A1W2PPH2	22	K	0.142857	0.373294	PTF1A
Q3Y9I8	13	K	0.142857	0.373294	HBB
M0R2L9	6	K	-0.142857	0.373294	RPS19
Q53QD5	2	K	0.142857	0.373294	HSPD1
A0A0U4EXB4	5	K	-0.142857	0.373294	HP
Q8N4T8	59	K	-0.142857	0.373294	CBR4
A0A384MDY0	120	K	0.142857	0.373294	CTNNA1
Q9HCC0	269	K	-0.142857	0.373294	MCCC2
Q09666	2801	K	0.142857	0.373294	AHNAK
A0A0A0MTH3	131	K	0.142857	0.373294	ILK
A0A286YFE0	143	K	-0.142857	0.373294	CCDC196
Q09666	2545	K	-0.142857	0.373294	AHNAK
Q09666	1417	K	-0.142857	0.373294	AHNAK
Q15257	337	K	0.142857	0.373294	PTPA
O75369	1872	K	0.142857	0.373294	FLNB
O75369	2244	K	-0.142857	0.373294	FLNB
Q15365	78	K	0.142857	0.373294	PCBP1
A0A024R2C5	17	K	0.142857	0.373294	VPS4B
A0A1B0GVD5	331	K	-0.142857	0.373294	CTSD
A8MU46	371	K	0.142857	0.373294	SMTNL1
L8B196	257	K	0.142857	0.373294	UbC
A0A0S2Z3G9	437	K	0.142857	0.373294	ACTN4
O60701	279	K	0.142857	0.373294	UGDH
J3QLC9	140	K	0.142857	0.373294	HP
O76003	217	K	0.142857	0.373294	GLRX3
O94903	266	K	0.142857	0.373294	PLPBP
Q562R1	292	K	-0.142857	0.373294	ACTBL2
P18283	122	K	0.142857	0.373294	GPX2
Q96BQ1	59	K	-0.142857	0.373294	FAM3D
A0A024RAC5	103	K	0.142857	0.373294	RCC2
A0A024R962	754	K	-0.142857	0.373294	hCG_40889
Q6UWP2	228	K	-0.142857	0.373294	DHRS11
A0A2X0SFY5	693	K	-0.142857	0.373294	SYDE2
P11586	793	K	0.142857	0.373294	MTHFD1
E9PIB2	78	K	0.142857	0.373294	GSDMD
I3VM53	493	K	-0.142857	0.373294	KDM2A
P49961	288	K	-0.142857	0.373294	ENTPD1
O00267	601	K	-0.142857	0.373294	SUPT5H
Q9UFN0	136	K	-0.142857	0.373294	NIPSNAP3A
P48735	426	K	0.142857	0.373294	IDH2
E7ESJ3	1538	K	0.142857	0.373294	ANKRD26
F5H5T5	622	K	0.142857	0.373294	UBE3B
P01024	1155	K	-0.142857	0.373294	C3
Q2M1J6	484	K	-0.142857	0.373294	OXA1L
P49863	211	K	0.142857	0.373294	GZMK
P48147	414	K	-0.142857	0.373294	PREP
H6VRF8	298	K	0.142857	0.373294	KRT1
P62280	58	K	0.142857	0.373294	RPS11
Q8ND56	324	K	-0.142857	0.373294	LSM14A
P24752	87	K	0.142857	0.373294	ACAT1
A0A0B4J2D5	171	K	0.142857	0.373294	GATD3B
Q9NY33	182	K	0.142857	0.373294	DPP3
J3KRP9	1072	K	0.142857	0.373294	TANC2
Q5SWX8	227	K	0.142857	0.373294	ODR4
P63241	126	K	0.142857	0.373294	EIF5A
P55263	331	K	0.142857	0.373294	ADK
P61160	219	K	0.142857	0.373294	ACTR2
P67775	21	K	0.142857	0.373294	PPP2CA
A7MBM6	1294	K	0.142857	0.373294	MLL3
P01008	273	K	-0.142857	0.373294	SERPINC1
Q5TZA2	1246	K	-0.142857	0.373294	CROCC
C9IY76	112	K	-0.142857	0.373294	DENND2A
Q9Y4W6	117	K	0.142857	0.373294	AFG3L2
Q2NKY5	336	K	0.142857	0.373294	TUBB6
I3L375	64	K	0.142857	0.373294	CA10
H3BQ97	14	K	0.142857	0.373294	RAB26
A0A140VJJ2	44	K	0.142857	0.373294	ESD
A0A3B3IRV3	18	K	0.142857	0.373294	MCTS2
Q4LE53	900	K	-0.142857	0.373294	EPHB2
Q09666	3048	K	-0.142857	0.373294	AHNAK
A0A0B4J2E5	627	K	0.142857	0.373294	LOC102724159
A2A274	616	K	0.142857	0.373294	ACO2
O15231	13	K	0.142857	0.373294	ZNF185
O75369	1319	K	-0.142857	0.373294	FLNB
Q99497	122	K	-0.142857	0.373294	PARK7
P23219	545	K	-0.142857	0.373294	PTGS1
Q68E01	106	K	-0.142857	0.373294	INTS3
O43414	314	K	0.142857	0.373294	ERI3
A0A090N8Y2	582	K	0.142857	0.373294	ERP70
P09871	629	K	-0.142857	0.373294	C1S
Q13428	1437	K	0.142857	0.373294	TCOF1
A0A024QZN4	924	K	-0.142857	0.373294	VCL
P00734	537	K	0.142857	0.373294	F2
O43866	56	K	-0.142857	0.373294	CD5L
Q9BWU5	96	K	0.142857	0.373294	HBB
Q8N2C7	770	K	0.142857	0.373294	UNC80
O60911	130	K	-0.142857	0.373294	CTSV
A0A3B3IUB5	380	K	0.142857	0.373294	HM13
Q13162	250	K	-0.142857	0.373294	PRDX4
Q6ZQW0	391	K	-0.142857	0.373294	IDO2
K9JA46	539	K	0.142857	0.373294	EL52
O96028	995	K	0.142857	0.373294	NSD2
P54136	153	K	0.142857	0.373294	RARS1
Q1XH10	256	K	0.142857	0.373294	SKIDA1
A0A0A0MSS8	9	K	0.142857	0.373294	AKR1C3
E5KNY5	1037	K	0.142857	0.373294	LRPPRC
A0A024QYR8	247	K	0.142857	0.373294	TM9SF2
Q9UG01	1096	K	0.142857	0.373294	IFT172
P21266	209	K	0.142857	0.373294	GSTM3
Q2TAK1	768	K	0.142857	0.373294	FBXO18
Q9Y2A4	372	K	-0.142857	0.373294	ZNF443
E9PB18	326	K	0.142857	0.373294	ELAPOR1
P47755	166	K	-0.142857	0.373294	CAPZA2
X6RJP6	40	K	0.142857	0.373294	TAGLN2
A0A0S2Z4Z0	35	K	0.142857	0.373294	RBM14
C9J1E6	80	K	0.142857	0.373294	EFCAB5
Q6FGX9	27	K	0.142857	0.373294	AK1
P08754	67	K	-0.142857	0.373294	GNAI3
Q96JM4	401	K	-0.142857	0.373294	LRRIQ1
Q8N6Q8	536	K	0.142857	0.373294	METTL25
Q03164	1828	K	0.142857	0.373294	KMT2A
R4SBI6	168	K	-0.142857	0.373294	EPHX1
P05388	26	K	0.142857	0.373294	RPLP0
Q9Y2W1	373	K	-0.142857	0.373294	THRAP3
Q9Y2W1	375	K	-0.142857	0.373294	THRAP3
P34932	785	K	-0.142857	0.373294	HSPA4
Q13526	117	K	0.142857	0.373294	PIN1
Q9P000	163	K	0.142857	0.373294	COMMD9
A0A024R6Y2	90	K	0.142857	0.373294	NUTF2
S6E000	162	K	-0.142857	0.373294	HLA-DQA1
A0A5B9R1D9	189	K	-0.142857	0.373294	HLA-DQA1
A0A455QYR6	189	K	0.142857	0.373294	HLA-DQA1
Q5S007	1471	K	-0.142857	0.373294	LRRK2
V9HWB8	151	K	0.142857	0.373294	HEL-S-30
P52948	757	K	0.142857	0.373294	NUP98
Q9NT62	183	K	0.142857	0.373294	ATG3
P00338	81	K	-0.142857	0.373294	LDHA
P01024	622	K	-0.142857	0.373294	C3
O14933	100	K	0.142857	0.373294	UBE2L6
Q68DC2	674	K	0.142857	0.373294	ANKS6
A4D1I6	53	K	0.142857	0.373294	LOC389533
P13639	16	K	-0.142857	0.373294	EEF2
Q9HC84	454	K	0.142857	0.373294	MUC5B
Q8N7B1	76	K	-0.142857	0.373294	HORMAD2
O15031	77	K	-0.142857	0.373294	PLXNB2
Q00839	495	K	0.142857	0.373294	HNRNPU
P55145	120	K	-0.142857	0.373294	MANF
A0A087WZT7	298	K	0.142857	0.373294	GAS8
P61106	35	K	-0.142857	0.373294	RAB14
O60449	142	K	-0.142857	0.373294	LY75
A0A0U1RQK4	1000	K	0.142857	0.373294	ADPRHL1
Q1ED39	217	K	0.142857	0.373294	KNOP1
Q6PI48	105	K	0.142857	0.373294	DARS2
Q8NEZ3	1328	K	-0.142857	0.373294	WDR19
V9HWH9	97	K	0.142857	0.373294	HEL-S-43
A0A0S2Z3W7	30	K	0.142857	0.373294	ITPA
A0A0S2Z410	53	K	-0.142857	0.373294	HSD17B10
D3DNU8	344	K	-0.142857	0.373294	KNG1
Q15746	1114	K	0.142857	0.373294	MYLK
H0YJ97	1483	K	-0.142857	0.373294	TRIP11
Q06830	68	K	0.142857	0.373294	PRDX1
H3BMR1	116	K	0.142857	0.373294	C15orf40
Q7Z5W6	408	K	-0.142857	0.373294	LAMA1
A0A024R1N1	1387	K	-0.142857	0.373294	MYH9
V9HWI5	45	K	0.142857	0.373294	HEL-S-15
Q5GH76	365	K	0.142857	0.373294	XKR4
Q2WGJ9	650	K	-0.142857	0.373294	FER1L6
A0A087X0W9	291	K	-0.142857	0.373294	OTUD6B
Q06830	93	K	0.142857	0.373294	PRDX1
E9PD91	216	K	0.142857	0.373294	RGS9
O75914	260	K	-0.142857	0.373294	PAK3
Q7Z3H4	396	K	0.142857	0.373294	SAMD7
O95613	1587	K	0.142857	0.373294	PCNT
P21695	5	K	-0.142857	0.373294	GPD1
P62906	161	K	-0.142857	0.373294	RPL10A
A0A087WTJ8	303	K	-0.142857	0.373294	ODAD4
V9HWF9	245	K	0.142857	0.373294	HEL20
D9IAI1	157	K	-0.142857	0.373294	PEBP1
Q9Y6R7	1457	K	0.142857	0.373294	FCGBP
Q7L590	665	K	-0.142857	0.373294	MCM10
P13929	179	K	0.142857	0.373294	ENO3
F5GYN6	73	K	0.142857	0.373294	IRAK3
Q02880	471	K	-0.142857	0.373294	TOP2B
Q96T23	959	K	0.142857	0.373294	RSF1
Q09666	2166	K	0.142857	0.373294	AHNAK
Q09666	1904	K	0.142857	0.373294	AHNAK
Q8IU85	52	K	0.142857	0.373294	CAMK1D
Q9ULV0	515	K	0.142857	0.373294	MYO5B
Q6FHC3	239	K	0.142857	0.373294	CNN2
A0A024R962	496	K	0.142857	0.373294	hCG_40889
V9HW96	358	K	0.142857	0.373294	HEL-S-100n
Q9Y394	171	K	-0.142857	0.373294	DHRS7
Q7KZF4	93	K	-0.142857	0.373294	SND1
P61247	94	K	-0.142857	0.373294	RPS3A
A0A024R1U0	306	K	0.142857	0.373294	RANGAP1
Q02952	467	K	0.142857	0.373294	AKAP12
Q9BPW9	30	K	-0.142857	0.373294	DHRS9
A0A0S2Z3W7	110	K	0.142857	0.373294	ITPA
A0A024R1N1	1676	K	0.142857	0.373294	MYH9
D9YZU7	121	K	0.142857	0.373294	HBE1
Q5T4U5	428	K	0.142857	0.373294	ACADM
Q9ULA4	159	K	-0.142857	0.373294	hCG_1639816
A0A024R201	132	K	0.142857	0.373294	PSMD13
D6RAM4	65	K	0.142857	0.373294	PACRGL
P49327	2193	K	0.142857	0.373294	FASN
E7EQS8	774	K	0.142857	0.373294	TET2
A0A2I3JL00	443	K	-0.142857	0.373294	MFSD2B
P43405	232	K	-0.142857	0.373294	SYK
Q96F45	163	K	0.142857	0.373294	ZNF503
A0A3B3IRX2	8	K	0.142857	0.373294	PLA2G2A
Q99685	245	K	-0.142857	0.373294	MGLL
K7ESA4	116	K	0.142857	0.373294	ATF7
B4DPQ0	91	K	-0.142857	0.373294	C1R
P38117	59	K	-0.142857	0.373294	ETFB
Q9Y3I0	492	K	0.142857	0.373294	RTCB
P48147	233	K	0.142857	0.373294	PREP
V9HW22	128	K	0.142857	0.373294	HEL-S-72p
A0A087WZT7	111	K	0.142857	0.373294	GAS8
G3V1V0	144	K	-0.142857	0.373294	MYL6
Q96M83	86	K	0.142857	0.373294	CCDC7
P61758	153	K	0.142857	0.373294	VBP1
Q9BXB4	169	K	-0.142857	0.373294	OSBPL11
A0A0B4J2B5	98	K	-0.142857	0.373294	IGHV3OR16-9
Q9H9A5	507	K	0.142857	0.373294	CNOT10
Q9NQV6	318	K	0.142857	0.373294	PRDM10
A0A024R8S5	401	K	0.142857	0.373294	P4HB
Q5TZP7	299	K	0.142857	0.373294	APEX1
P48735	340	K	-0.142857	0.373294	IDH2
P48735	340	K	-0.142857	0.373294	IDH2
Q9Y5G2	403	K	0.142857	0.373294	PCDHGB2
Q9UHB9	587	K	0.142857	0.373294	SRP68
P02675	313	K	-0.142857	0.373294	FGB
P63279	146	K	0.142857	0.373294	UBE2I
Q5SZE1	96	K	0.142857	0.373294	CERS2
B7ZLY6	713	K	-0.142857	0.373294	PIK3C2G
Q96GM8	376	K	0.142857	0.373294	TOE1
A0A0A0MR18	394	K	-0.142857	0.373294	DMRT2
O15031	1110	K	0.142857	0.373294	PLXNB2
V9HWE3	214	K	-0.142857	0.373294	HEL-S-11
Q9Y394	321	K	0.142857	0.373294	DHRS7
Q9Y3S1	1780	K	0.142857	0.373294	WNK2
P68366	352	K	-0.142857	0.373294	TUBA4A
Q6P996	731	K	-0.142857	0.373294	PDXDC1
P46109	253	K	0.142857	0.373294	CRKL
A0A2R8YFX5	770	K	-0.142857	0.373294	NAV3
Q07954	520	K	-0.142857	0.373294	LRP1
Q86Y25	226	K	0.142857	0.373294	ZNF354C
Q2KHM5	456	K	-0.142857	0.373294	CENPJ
P02008	83	K	-0.142857	0.373294	HBZ
P52895	246	K	-0.142857	0.373294	AKR1C2
F8VQZ7	46	K	0.142857	0.373294	METAP2
G8FQ53	145	K	-0.142857	0.373294	HLA-A
Q9NXL9	911	K	0.142857	0.373294	MCM9
Q99715	1272	K	0.142857	0.373294	COL12A1
V9GXZ4	554	K	0.142857	0.373294	FPGT-TNNI3K
Q99460	807	K	0.142857	0.373294	PSMD1
A0A2U8J8G7	63	K	0.142857	0.373294	IgH
Q54A51	127	K	0.142857	0.373294	hEMMPRIN
Q12955	1888	K	0.142857	0.373294	ANK3
P13639	42	K	0.142857	0.373294	EEF2
A0A140VJJ2	186	K	0.142857	0.373294	ESD
Q16663	79	K	-0.142857	0.373294	CCL15
A0A1W2PR17	116	K	-0.142857	0.373294	PFKFB3
B0YJB4	674	K	-0.142857	0.373294	TTC12
Q96I23	64	K	-0.142857	0.373294	PYURF
O95299	252	K	-0.142857	0.373294	NDUFA10
A6NF89	225	K	0.142857	0.373294	OR6C6
Q6FGX9	27	K	0.142857	0.373294	AK1
P98187	308	K	-0.142857	0.373294	CYP4F8
Q8N1G4	226	K	-0.142857	0.373294	LRRC47
O95433	55	K	0.142857	0.373294	AHSA1
P52943	176	K	0.142857	0.373294	CRIP2
P50238	49	K	0.142857	0.373294	CRIP1
P50238	64	K	0.142857	0.373294	CRIP1
P0DO97	193	K	0.142857	0.373294	CCDC192
A0A0S2Z5B3	181	K	-0.142857	0.373294	ETHE1
Q7Z4V5	168	K	-0.142857	0.373294	HDGFL2
Q5VYK3	1067	K	0.142857	0.373294	ECPAS
Q5SR44	1433	K	-0.142857	0.373294	CR1
A0A6Q8PHQ0	60	K	-0.142857	0.373294	HARS1
P62280	48	K	0.142857	0.373294	RPS11
P50995	286	K	0.142857	0.373294	ANXA11
Q6ZSM3	476	K	-0.142857	0.373294	SLC16A12
A0A024R179	37	K	0.142857	0.373294	NCBP1
Q01469	72	K	-0.142857	0.373294	FABP5
D3DNU8	79	K	0.142857	0.373294	KNG1
P02671	480	K	-0.142857	0.373294	FGA
A0A024R277	98	K	-0.142857	0.373294	SPTLC1
O15264	45	K	0.142857	0.373294	MAPK13
X5DP31	595	K	-0.142857	0.373294	ARNT2
Q8N1C8	500	K	0.142857	0.373294	HSPA9
O15145	158	K	0.142857	0.373294	ARPC3
H3BVF3	69	K	0.142857	0.373294	NDRG4
O15335	45	K	0.142857	0.373294	CHAD
P63241	67	K	-0.142857	0.373294	EIF5A
A0A385HVY8	17	K	0.142857	0.373294	HBA2
A0A2R8Y811	63	K	0.142857	0.373294	RPS14
Q12864	331	K	0.142857	0.373294	CDH17
P17987	84	K	0.142857	0.373294	TCP1
A0A024R9D8	277	K	0.142857	0.373294	SPAG1
Q3LR79	83	K	0.142857	0.373294	HBB
Q4F786	96	K	-0.142857	0.373294	HBD
Q8N4C9	161	K	0.142857	0.373294	C17orf78
X5BVM8	512	K	0.142857	0.373294	COX1
A0A0S2Z487	345	K	-0.142857	0.373294	JUP
A0A2R8YCH5	354	K	0.142857	0.373294	CTNNB1
Q96F07	287	K	0.142857	0.373294	CYFIP2
B2R491	168	K	0.142857	0.373294	RPS4X
D1MAM3	745	K	-0.142857	0.373294	ALK
A0A494C071	127	K	-0.142857	0.373294	PWWP4
Q9NRF8	137	K	0.142857	0.373294	CTPS2
Q8IYA6	294	K	0.142857	0.373294	CKAP2L
P42285	126	K	0.142857	0.373294	MTREX
Q9UJX3	139	K	0.142857	0.373294	ANAPC7
P01024	879	K	0.142857	0.373294	C3
P12004	138	K	0.142857	0.373294	PCNA
O14672	405	K	-0.142857	0.373294	ADAM10
A0A024R059	400	K	0.142857	0.373294	HMGCS1
H3BQZ7	305	K	-0.142857	0.373294	HNRNPUL2-BSCL2
P07814	637	K	0.142857	0.373294	EPRS1
A0A024RD41	122	K	0.142857	0.373294	RAB23
A0A024RD41	132	K	0.142857	0.373294	RAB23
A0A024R0R4	217	K	0.142857	0.373294	SAE1
Q9UI40	301	K	-0.142857	0.373294	SLC24A2
P62424	37	K	0.142857	0.373294	RPL7A
Q9Y6R7	4027	K	-0.142857	0.373294	FCGBP
Q9Y2I8	396	K	0.142857	0.373294	WDR37
P17987	494	K	-0.142857	0.373294	TCP1
P43897	246	K	0.142857	0.373294	TSFM
Q9UGI8	193	K	0.142857	0.373294	TES
G3V0I5	119	K	0.142857	0.373294	NDUFV1
Q09666	1333	K	0.142857	0.373294	AHNAK
P20618	94	K	0.142857	0.373294	PSMB1
Q4JM47	90	K	-0.142857	0.373294	AGR2
V5NWD0	58	K	0.142857	0.373294	HLA-C
E9PAZ4	123	K	0.142857	0.373294	TTC39A
P04083	128	K	0.142857	0.373294	ANXA1
P13929	54	K	0.142857	0.373294	ENO3
V9HW90	97	K	-0.142857	0.373294	HEL-75
A0A0S4XR13	210	K	-0.142857	0.373294	HLA-A
I0LEY6	210	K	0.142857	0.373294	HLA-B
P0DTE1	114	K	-0.142857	0.373294	IGHV3-38-3
V9HWB8	367	K	0.142857	0.373294	HEL-S-30
A0A6B7IHL9	210	K	-0.142857	0.373294	HLA-C
Q6I9V1	92	K	-0.142857	0.373294	DPEP1
Q9Y4B5	158	K	-0.142857	0.373294	MTCL1
Q14240	69	K	0.142857	0.373294	EIF4A2
F8W8H5	71	K	0.142857	0.373294	RAB24
P13645	179	K	-0.142857	0.373294	KRT10
O43175	289	K	0.142857	0.373294	PHGDH
Q08AM6	423	K	0.142857	0.373294	VAC14
Q860A9	65	K	0.142857	0.373294	HLA-A
V5LDS6	50	K	-0.142857	0.373294	HLA-A
A0A223FKZ7	90	K	-0.142857	0.373294	HLA-A
A0A0C4DG33	876	K	0.142857	0.373294	PEX1
O95834	399	K	0.142857	0.373294	EML2
P02765	218	K	0.142857	0.373294	AHSG
Q6NUM9	589	K	-0.142857	0.373294	RETSAT
P55072	277	K	0.142857	0.373294	VCP
P55072	164	K	0.142857	0.373294	VCP
Q9Y624	168	K	-0.142857	0.373294	F11R
A0A3S6RIM5	60	K	0.142857	0.373294	HLA-DRB1
A0A0A7C689	60	K	-0.142857	0.373294	HLA-DQB1
C9JQS9	101	K	-0.142857	0.373294	PCCB
Q15149	1127	K	0.142857	0.373294	PLEC
P25788	43	K	0.142857	0.373294	PSMA3
P43304	271	K	-0.142857	0.373294	GPD2
P12724	65	K	0.142857	0.373294	RNASE3
Q9Y394	101	K	0.142857	0.373294	DHRS7
Q96IQ7	174	K	-0.142857	0.373294	VSIG2
Q93009	490	K	0.142857	0.373294	USP7
A0A024R1U0	325	K	0.142857	0.373294	RANGAP1
A0A024R6D8	60	K	0.142857	0.373294	SFRS5
F8W9E7	28	K	0.142857	0.373294	ELMO3
Q96EP0	988	K	0.142857	0.373294	RNF31
Q6FIC5	238	K	0.142857	0.373294	CLIC4
D9ZGF2	470	K	-0.142857	0.373294	COL6A3
Q5JRM6	175	K	0.142857	0.373294	NXF2B
P54136	504	K	0.142857	0.373294	RARS1
L7RXH0	911	K	-0.142857	0.373294	ITGAV
Q7Z374	351	K	-0.142857	0.373294	DKFZp686C02218
Q6FI35	164	K	0.142857	0.373294	PCNA
O75369	1379	K	-0.142857	0.373294	FLNB
Q92747	36	K	0.142857	0.373294	ARPC1A
A0A024R837	227	K	-0.142857	0.373294	HDHD3
Q86YU9	875	K	-0.142857	0.373294	FLJ00414
Q99497	63	K	-0.142857	0.373294	PARK7
Q96DG6	227	K	-0.142857	0.373294	CMBL
Q96DG6	227	K	-0.142857	0.373294	CMBL
P55072	211	K	-0.142857	0.373294	VCP
K7ERE2	23	K	0.142857	0.373294	TMEM106A
P42765	181	K	0.142857	0.373294	ACAA2
Q12906	182	K	0.142857	0.373294	ILF3
Q70KF9	92	K	-0.142857	0.373294	HLA-B
Q86W50	471	K	-0.142857	0.373294	METTL16
Q9BRR6	471	K	-0.142857	0.373294	ADPGK
Q14204	1992	K	-0.142857	0.373294	DYNC1H1
P78527	1422	K	0.142857	0.373294	PRKDC
A0A2R8Y793	118	K	-0.142857	0.373294	ACTB
Q562T8	35	K	-0.142857	0.373294	ACT
Q9UBF2	300	K	-0.142857	0.373294	COPG2
Q66GS9	983	K	-0.142857	0.373294	CEP135
Q9P2F5	659	K	-0.142857	0.373294	STOX2
B1AMU7	85	K	0.142857	0.373294	EXOSC1
O75356	388	K	-0.142857	0.373294	ENTPD5
P46939	2183	K	-0.142857	0.373294	UTRN
A0A024R125	127	K	-0.142857	0.373294	PRKAG1
B7ZLZ9	73	K	-0.142857	0.373294	NDRG3
Q14315	1935	K	-0.142857	0.373294	FLNC
F4NBS0	59	K	-0.142857	0.373294	HLA-B
Q13228	289	K	-0.142857	0.373294	SELENBP1
Q71DI3	116	K	-0.142857	0.373294	H3C15
P63244	172	K	-0.142857	0.373294	RACK1
P00325	136	K	-0.142857	0.373294	ADH1B
V5NVN2	58	K	0.142857	0.373294	HLA-C
Q5FWE3	365	K	-0.142857	0.373294	PRRT3
P31040	361	K	-0.142857	0.373294	SDHA
A0A140VJJ2	91	K	-0.142857	0.373294	ESD
A0A024RCD1	286	K	-0.142857	0.373294	ART5
Q8TC62	43	K	-0.142857	0.373294	44811
A0A024R6D8	60	K	0.142857	0.373294	SFRS5
B4DHE8	144	K	0.142857	0.373294	MSI2
Q92945	177	K	0.142857	0.373294	KHSRP
E9LY50	120	K	0.142857	0.373294	HLA-B
P68133	70	K	0.142857	0.373294	ACTA1
A7MBN3	895	K	0.142857	0.373294	COL4A5
E5RI87	163	K	-0.142857	0.373294	RNF130
C9JFV4	50	K	0.142857	0.373294	PELP1
A0A087WXH5	141	K	0.142857	0.373294	JAG1
E9PB90	827	K	-0.142857	0.373294	HK2
P45973	125	K	-0.142857	0.373294	CBX5
P32119	135	K	-0.142857	0.373294	PRDX2
P00918	212	K	-0.142857	0.373294	CA2
J3KSB2	31	K	-0.142857	0.373294	SPATA33
Q6IAV5	26	K	0.142857	0.373294	OXCT
Q86UK5	782	K	0.142857	0.373294	EVC2
Q9UKD2	177	K	0.142857	0.373294	MRTO4
Q06210	48	K	0.142857	0.373294	GFPT1
Q14204	2589	K	0.142857	0.373294	DYNC1H1
Q9Y5P6	143	K	-0.142857	0.373294	GMPPB
Q13217	318	K	0.142857	0.373294	DNAJC3
P46777	85	K	-0.142857	0.373294	RPL5
O43143	408	K	-0.142857	0.373294	DHX15
Q16775	136	K	0.142857	0.373294	HAGH
P07195	279	K	0.142857	0.373294	LDHB
P78527	3355	K	0.142857	0.373294	PRKDC
A0A0S2Z3X8	309	K	0.142857	0.373294	GDI1
A0A024RB23	447	K	0.142857	0.373294	DGKA
J3KRX5	153	K	0.142857	0.373294	RPL17
P15924	1802	K	0.142857	0.373294	DSP
Q5JS37	242	K	-0.142857	0.373294	NHLRC3
H3BPD2	93	K	-0.142857	0.373294	MTHFSD
A0A024R657	1153	K	0.142857	0.373294	ARID4A
P13645	40	K	0.142857	0.373294	KRT10
A0A6Q8PGB1	60	K	-0.142857	0.373294	CEP290
Q9UHB6	439	K	0.142857	0.373294	LIMA1
P46013	2245	K	-0.142857	0.373294	MKI67
D3DP75	216	K	0.142857	0.373294	RAB3GAP1
Q68CJ6	369	K	-0.142857	0.373294	NUGGC
Q8NE62	169	K	-0.142857	0.373294	CHDH
A0A126LAW9	17	K	-0.142857	0.373294	U28
Q8NFZ8	191	K	0.142857	0.373294	CADM4
P17676	187	K	-0.142857	0.373294	CEBPB
P51816	682	K	-0.142857	0.373294	AFF2
Q8NCU4	839	K	0.142857	0.373294	CCDC191
L8E8D0	27	K	0.142857	0.373294	ATRX
P23352	411	K	-0.142857	0.373294	ANOS1
H3BM86	85	K	-0.142857	0.373294	FAM219B
P02760	88	K	-0.142857	0.373294	AMBP
Q16531	723	K	0.142857	0.373294	DDB1
Q5MNV8	196	K	-0.142857	0.373294	FBXO47
P0DO97	218	K	0.142857	0.373294	CCDC192
F5H5D3	194	K	-0.142857	0.373294	TUBA1C
Q9ULZ3	174	K	-0.142857	0.373294	PYCARD
P32119	67	K	-0.142857	0.373294	PRDX2
J3KP75	546	K	-0.142857	0.373294	PHACTR2
A4ZL49	364	K	0.142857	0.373294	ND5
Q9Y4W6	398	K	-0.142857	0.373294	AFG3L2
K7EQ86	798	K	-0.142857	0.373294	KIAA0100
Q5VSF9	881	K	0.142857	0.373294	GRIN1
A0A0S2Q0B1	2159	K	0.142857	0.373294	ARID1A
Q9BW60	54	K	0.142857	0.373294	ELOVL1
P07327	136	K	-0.142857	0.373294	ADH1A
Q5TZP7	203	K	-0.142857	0.373294	APEX1
Q5VT28	3	K	-0.142857	0.373294	FAM27B
Q8NBG7	165	K	-0.142857	0.373294	hCG_1995134
A0A024R6W0	338	K	-0.142857	0.373294	GOT2
A0A0C4DGR6	163	K	0.142857	0.373294	SFXN2
P50395	329	K	0.142857	0.373294	GDI2
Q8WUA4	148	K	-0.142857	0.373294	GTF3C2
M0QX88	64	K	-0.142857	0.373294	VRK3
B7ZKP1	120	K	0.142857	0.373294	TMEM20
Q01469	82	K	-0.142857	0.373294	FABP5
P39023	250	K	0.142857	0.373294	RPL3
Q9NZT2	492	K	0.142857	0.373294	OGFR
A0A126LAY6	127	K	0.142857	0.373294	U41
A0A3S6H812	95	K	0.142857	0.373294	PRMT1
B2M1S8	18	K	-0.142857	0.373294	HBD
P25398	112	K	-0.142857	0.373294	RPS12
O00159	781	K	0.142857	0.373294	MYO1C
P55072	754	K	-0.142857	0.373294	VCP
Q9UNE7	41	K	-0.142857	0.373294	STUB1
P05164	431	K	-0.142857	0.373294	MPO
P05161	77	K	0.142857	0.373294	ISG15
Q6ZQY2	133	K	-0.142857	0.373294	LRRC74B
A0A024R1N1	833	K	0.142857	0.373294	MYH9
Q92896	272	K	-0.142857	0.373294	GLG1
P61626	51	K	0.142857	0.373294	LYZ
A0A024R720	102	K	0.142857	0.373294	PIK3CG
O00391	172	K	-0.142857	0.373294	QSOX1
B7SEV8	70	K	-0.142857	0.373294	KIR2DS5
D5KN01	214	K	0.142857	0.373294	CYP2D6
Q05D28	266	K	-0.142857	0.373294	CCDC91
P01023	557	K	0.142857	0.373294	A2M
A0A286YF65	628	K	-0.142857	0.373294	NOD2
P35250	208	K	0.142857	0.373294	RFC2
Q5T081	362	K	0.142857	0.373294	RCC1
Q9C0F0	1789	K	0.142857	0.373294	ASXL3
A0A087WVQ6	834	K	-0.142857	0.373294	CLTC
A0A2U3TZL5	90	K	-0.142857	0.373294	CD59
Q6P1L4	32	K	-0.142857	0.373294	PYGL
Q8NEY1	591	K	0.142857	0.373294	NAV1
Q9UK32	166	K	-0.142857	0.373294	RPS6KA6
Q5JSL3	13	K	0.142857	0.373294	DOCK11
B5BU82	173	K	-0.142857	0.373294	SOCS2
A0A024R8D6	475	K	0.142857	0.373294	PKN3
Q06830	178	K	0.142857	0.373294	PRDX1
P32119	177	K	-0.142857	0.373294	PRDX2
Q13162	250	K	0.142857	0.373294	PRDX4
Q15031	339	K	0.142857	0.373294	LARS2
Q6NUP7	544	K	0.142857	0.373294	PPP4R4
P25874	73	K	-0.142857	0.373294	UCP1
P04843	474	K	-0.142857	0.373294	RPN1
V9HWE9	30	K	-0.142857	0.373294	HEL-S-22
B2RUU3	1208	K	-0.142857	0.373294	DOCK1
P0DMV9	524	K	-0.142857	0.373294	HSPA1B
A0A024R694	376	K	-0.142857	0.373294	ACTN1
P60228	172	K	-0.142857	0.373294	EIF3E
Q02747	83	K	0.142857	0.373294	GUCA2A
M0R0F0	167	K	0.142857	0.373294	RPS5
P48735	155	K	0.142857	0.373294	IDH2
U3KQ42	83	K	0.142857	0.373294	ZNF705A
P42224	110	K	-0.142857	0.373294	STAT1
Q6PGP7	300	K	-0.142857	0.373294	TTC37
M0R0Q6	68	K	0.142857	0.373294	ZNF470
Q6ZQQ2	474	K	0.142857	0.373294	SPATA31D1
P13639	42	K	0.142857	0.373294	EEF2
P46776	77	K	0.142857	0.373294	RPL27A
P27708	739	K	0.142857	0.373294	CAD
A0A024R7L5	200	K	0.142857	0.373294	UPF1
Q5TEA6	45	K	-0.142857	0.373294	SEL1L2
A0A0S2Z3L2	995	K	-0.142857	0.373294	ATP2A2
A0A024R1I3	213	K	0.142857	0.373294	PDXP
Q8IX07	281	K	0.142857	0.373294	ZFPM1
Q6SJ93	585	K	-0.142857	0.373294	FAM111B
A0A024R7L5	220	K	-0.142857	0.373294	UPF1
Q9UK41	98	K	0.142857	0.373294	VPS28
P07814	693	K	-0.142857	0.373294	EPRS1
O15247	189	K	0.142857	0.373294	CLIC2
P32004	56	K	-0.142857	0.373294	L1CAM
X6RF29	211	K	0.142857	0.373294	EXO5
V9HWE1	334	K	-0.142857	0.373294	HEL113
Q8NEV8	1220	K	0.142857	0.373294	EXPH5
A0A087WT59	114	K	-0.142857	0.373294	TTR
Q7L5N7	233	K	0.142857	0.373294	LPCAT2
Q9NR16	471	K	-0.142857	0.373294	CD163L1
O76021	100	K	0.142857	0.373294	RSL1D1
O75369	782	K	0.142857	0.373294	FLNB
P47813	104	K	-0.142857	0.373294	EIF1AX
P20929	2330	K	0.142857	0.373294	NEB
Q02127	226	K	-0.142857	0.373294	DHODH
A0A024RB85	51	K	0.142857	0.373294	PA2G4
Q9BZE1	100	K	-0.142857	0.373294	MRPL37
P35244	23	K	0.142857	0.373294	RPA3
Q15746	1376	K	0.142857	0.373294	MYLK
P30048	217	K	-0.142857	0.373294	PRDX3
Q8N4A0	570	K	-0.142857	0.373294	GALNT4
Q8NF37	221	K	0.142857	0.373294	LPCAT1
F6IR48	210	K	0.142857	0.373294	HLA-A
P13671	706	K	0.142857	0.373294	C6
E9PKZ0	92	K	-0.142857	0.373294	RPL8
A0A075B730	1865	K	0.142857	0.373294	EPPK1
A0A384NYH5	248	K	-0.142857	0.373294	ANKRD1
A0A384MDY0	773	K	-0.142857	0.373294	CTNNA1
C9K029	183	K	-0.142857	0.373294	AIFM3
F5H1S1	215	K	0.142857	0.373294	PIGB
P11717	1372	K	0.142857	0.373294	IGF2R
D6RD17	101	K	-0.142857	0.373294	JCHAIN
L8ECD3	52	K	0.142857	0.373294	ME3
A0A024RAB6	3472	K	-0.142857	0.373294	HSPG2
P29373	83	K	0.142857	0.373294	CRABP2
B4DEE8	49	K	-0.142857	0.373294	MGMT
A0A024R137	62	K	0.142857	0.373294	SMARCD1
O75445	199	K	0.142857	0.373294	USH2A
A0A0S2Z4R1	412	K	0.142857	0.373294	YARS
P84090	34	K	0.142857	0.373294	ERH
Q6UWM9	281	K	0.142857	0.373294	UGT2A3
Q9UHQ9	177	K	-0.142857	0.373294	CYB5R1
P61221	478	K	0.142857	0.373294	ABCE1
A4D275	234	K	-0.142857	0.373294	ARPC1B
B5MDF5	140	K	-0.142857	0.373294	RAN
P33176	67	K	0.142857	0.373294	KIF5B
D9ZGF2	1833	K	-0.142857	0.373294	COL6A3
P17021	384	K	-0.142857	0.373294	ZNF17
Q14315	2463	K	0.142857	0.373294	FLNC
Q96AB3	26	K	-0.142857	0.373294	ISOC2
Q14789	260	K	0.142857	0.373294	GOLGB1
A0A384MDY0	525	K	-0.142857	0.373294	CTNNA1
P09132	87	K	-0.142857	0.373294	SRP19
Q99795	143	K	-0.142857	0.373294	GPA33
P01023	841	K	-0.142857	0.373294	A2M
Q9Y6R7	213	K	-0.142857	0.373294	FCGBP
Q9HAP6	98	K	0.142857	0.373294	LIN7B
Q02218	488	K	-0.142857	0.373294	OGDH
P43121	153	K	-0.142857	0.373294	MCAM
Q15393	1049	K	-0.142857	0.373294	SF3B3
Q6FHU2	157	K	0.142857	0.373294	PGAM1
Q9NSY2	145	K	-0.142857	0.373294	STARD5
P58107	2234	K	-0.142857	0.373294	EPPK1
G3CC82	175	K	-0.142857	0.373294	HLA-B
A0A3G2LML8	261	K	-0.344545	0.378954	HLA-B
A0A2U3TZH6	705	K	0.122706	0.387852	EPB41
P21333	2289	K	0.396533	0.387871	FLNA
P05026	134	K	-0.319577	0.389203	ATP1B1
V9HWK1	142	K	-0.236011	0.390305	HEL-S-49
E9PLK3	521	K	0.226423	0.399935	NPEPPS
V9HWF6	153	K	-0.226423	0.399935	HEL-S-153w
A0A087WVQ6	36	K	0.226423	0.399935	CLTC
A0A0S2Z487	615	K	0.226423	0.399935	JUP
P61224	117	K	-0.226423	0.399935	RAP1B
P01859	201	K	0.226423	0.399935	IGHG2
Q6J1Z9	76	K	0.226423	0.399935	HBA1
A0A0S2Z4J1	284	K	0.226423	0.399935	HSD17B4
P34932	773	K	-0.221457	0.405246	HSPA4
P12004	138	K	0.221457	0.405246	PCNA
Q15056	96	K	-0.221457	0.405246	EIF4H
X5D2U3	64	K	-0.221457	0.405246	STK39
A0A024R5W6	189	K	-0.35279	0.40947	TPM1
M0R3F1	376	K	0.36679	0.411774	HNRNPUL1
V9HWB8	322	K	-0.299934	0.417733	HEL-S-30
P0DMV9	3	K	-0.226423	0.436512	HSPA1B
D6RF35	150	K	-0.226423	0.436512	GC
A0A024R1T9	630	K	0.221457	0.442894	ACLY
Q53FP2	87	K	0.221457	0.442894	TMEM35A
Q96DG6	218	K	-0.221457	0.442894	CMBL
V9HWK1	219	K	0.315745	0.44655	HEL-S-49
H0YFD6	94	K	-0.256718	0.452895	HADHA
V9HWK1	131	K	0.207115	0.459825	HEL-S-49
P50991	213	K	-0.207115	0.459825	CCT4
H0YF33	219	K	0.202148	0.475137	NASP
Q562Z4	84	K	-0.202148	0.475137	ACT
B4DY08	50	K	0.207115	0.479812	HNRNPC
P60981	44	K	0.110715	0.481311	DSTN
P62424	197	K	-0.221457	0.486846	RPL7A
O14979	180	K	-0.237179	0.487455	HNRNPDL
A0A6B7IBY9	364	K	0.326892	0.487726	HLA-A
A0A0S2Z4J1	528	K	0.226423	0.496473	HSD17B4
Q9Y3R5	333	K	0.237179	0.501684	DOP1B
Q9Y6R7	1457	K	0.19256	0.50474	FCGBP
P01116	117	K	0.221457	0.509007	KRAS
A4FU01	356	K	0.226423	0.513813	MTMR11
A0A024R6Z0	233	K	0.221457	0.520866	DYNC1LI2
X6RAJ1	25	K	0.142857	0.528028	AKAP17A
Q9Y259	20	K	0.142857	0.528028	CHKB
B4DHZ6	4	K	0.142857	0.528028	TF
Q96FQ6	10	K	0.142857	0.528028	S100A16
B5MCX3	10	K	0.142857	0.528028	SEPTIN2
Q92896	972	K	0.142857	0.528028	GLG1
V9HWN7	294	K	0.142857	0.528028	HEL-S-87p
P63241	126	K	0.142857	0.528028	EIF5A
P60981	132	K	0.142857	0.528028	DSTN
A0A024R6K8	277	K	0.142857	0.528028	WARS
Q92618	158	K	0.142857	0.528028	ZNF516
Q9NYU2	157	K	0.142857	0.528028	UGGT1
Q9ULZ3	174	K	0.142857	0.528028	PYCARD
Q13867	42	K	0.142857	0.528028	BLMH
O15145	165	K	0.142857	0.528028	ARPC3
A0A087X0S5	166	K	0.142857	0.528028	COL6A1
Q15746	1831	K	0.142857	0.528028	MYLK
P35244	23	K	0.142857	0.528028	RPA3
E9PLK3	64	K	0.142857	0.528028	NPEPPS
P35606	346	K	0.142857	0.528028	COPB2
B7ZKW3	138	K	0.142857	0.528028	PDDC1
Q15370	55	K	-0.142857	0.528028	ELOB
A7MAE2	185	K	0.142857	0.528028	HLA-A
E1B2D6	185	K	0.142857	0.528028	HLA-A
Q68E00	83	K	0.142857	0.528028	DKFZp686G2045
Q19UJ9	14	K	-0.142857	0.528028	F9
H6VRF8	376	K	-0.142857	0.528028	KRT1
P22102	129	K	-0.142857	0.528028	GART
H0Y8G5	62	K	-0.142857	0.528028	HNRNPD
P30405	160	K	-0.142857	0.528028	PPIF
Q96G03	567	K	-0.142857	0.528028	PGM2
I3L397	68	K	-0.142857	0.528028	EIF5A
Q9BWU5	96	K	-0.142857	0.528028	HBB
H6VRF8	376	K	-0.142857	0.528028	KRT1
O15247	233	K	-0.142857	0.528028	CLIC2
Q6FHZ0	269	K	-0.142857	0.528028	MDH2
A0A6Q8PH71	947	K	-0.142857	0.528028	INF2
A0A087WVQ6	834	K	-0.142857	0.528028	CLTC
Q14315	1014	K	-0.142857	0.528028	FLNC
A0A024R5X2	125	K	-0.142857	0.528028	hCG_2001986
V9HWN7	147	K	0.237983	0.53689	HEL-S-87p
C8C504	96	K	0.377219	0.547551	HBB
P00738	94	K	-0.236011	0.548514	HP
O94832	94	K	-0.226423	0.558506	MYO1D
A0A024R1A3	911	K	-0.226423	0.558621	UBE1
E9PE17	98	K	-0.202148	0.56162	MRPS17
V9HWE9	103	K	-0.231044	0.568551	HEL-S-22
P02765	211	K	0.177406	0.569848	AHSG
A5PL27	245	K	0.192736	0.573106	CP
C8C504	96	K	-0.322441	0.575221	HBB
Q5ZEZ4	5	K	0.142857	0.579755	ACTN1
Q4TZM4	63	K	-0.142857	0.579755	HBB
P52789	525	K	0.142857	0.579755	HK2
P61769	95	K	-0.142857	0.579755	B2M
Q4TZM4	92	K	-0.142857	0.579755	HBB
Q6FIC5	238	K	-0.142857	0.579755	CLIC4
P35232	63	K	-0.142857	0.579755	PHB1
Q5T5U3	105	K	0.142857	0.579755	ARHGAP21
A0A140VJJ2	161	K	0.142857	0.579755	ESD
A0A024RC65	672	K	0.142857	0.579755	hCG_1991735
A0A087X2I1	182	K	-0.142857	0.579755	PSMC6
Q96AG4	66	K	-0.142857	0.579755	LRRC59
A0A024RAI1	191	K	0.123942	0.581468	ACTR3
C8C504	83	K	0.374372	0.581839	HBB
B4DP61	142	K	-0.17672	0.582133	SMN1
P68133	217	K	0.248395	0.588306	ACTA1
G3V3E8	94	K	-0.176167	0.588775	NPC2
P58546	85	K	-0.142857	0.593571	MTPN
Q99460	807	K	-0.142857	0.593571	PSMD1
P43121	153	K	-0.167132	0.594399	MCAM
P02768	402	K	-0.232283	0.599955	ALB
A0A024RC65	672	K	0.213736	0.606208	hCG_1991735
C8C504	18	K	-0.450922	0.610104	HBB
P49189	49	K	0.162166	0.613748	ALDH9A1
Q52MT0	9	K	-0.173573	0.615353	HBB
Q1ED39	230	K	0.142857	0.642222	KNOP1
P0C0L5	817	K	-0.142857	0.642222	C4B
Q9NQT3	77	K	0.147824	0.644179	HBA1
Q58FF2	289	K	-0.137891	0.6475	GRP94c
O00764	119	K	-0.142857	0.65319	PDXK
V9HWF4	97	K	-0.142857	0.656255	HEL-S-68p
A0A140VJJ2	186	K	0.142857	0.6576	ESD
B7Z596	223	K	-0.137891	0.66673	TPM1
C8C504	121	K	0.366019	0.666734	HBB
P02768	300	K	-0.358908	0.667201	ALB
P00441	10	K	-0.142857	0.669424	SOD1
Q01081	13	K	0.133269	0.669986	U2AF1
P22392	143	K	0.15279	0.670002	NME2
V9HWK1	131	K	0.156377	0.676592	HEL-S-49
V9HVY3	61	K	-0.15974	0.686212	HEL-S-269
P43246	172	K	-0.142857	0.692937	MSH2
P0DMV9	3	K	0.123549	0.701059	HSPA1B
A0A087WVD1	242	K	-0.100576	0.702222	LENG9
P16422	106	K	-0.138925	0.712466	EPCAM
Q6MZV7	396	K	0.154602	0.713711	DKFZp686C11235
P04406	186	K	-0.0931538	0.719239	GAPDH
P09525	100	K	-0.0931538	0.719239	ANXA4
A0A1S5UZ39	145	K	0.173627	0.724325	HBA2
P02042	96	K	-0.157077	0.726504	HBD
O75369	607	K	0.0835661	0.740717	FLNB
A0A024R1U0	565	K	0.0835661	0.740717	RANGAP1
Q597H1	53	K	0.0835661	0.740717	TRG14
Q2M2I5	435	K	0.0835661	0.740717	KRT24
Q16663	79	K	-0.0835661	0.740717	CCL15
A6NDG6	290	K	0.0835661	0.740717	PGP
Q01469	72	K	0.0835661	0.740717	FABP5
A0A0K2GN21	330	K	0.0835661	0.740717	BCKDHB
Q06830	168	K	-0.143017	0.745751	PRDX1
I3L397	68	K	-0.0931538	0.748231	EIF5A
L8E9S3	12	K	-0.0785996	0.752418	PDZD2
Q86W28	1010	K	-0.0785996	0.752418	NLRP8
P14324	332	K	0.0785996	0.752418	FDPS
A0A024RBY1	55	K	0.0785996	0.752418	SMPX
Q86VZ3	346	K	0.0785996	0.752418	JPH2
V9HWE9	103	K	0.120621	0.76013	HEL-S-22
P21333	220	K	0.135176	0.76541	FLNA
G3V515	108	K	0.14902	0.769307	ZFP36L1
Q4TZM4	5	K	0.0835661	0.769317	HBB
B2ZZ89	602	K	0.0835661	0.769317	SPTBN1
P32320	27	K	-0.0835661	0.769317	CDA
P21333	2000	K	0.144342	0.777417	FLNA
Q9Y3I0	190	K	0.0785996	0.780667	RTCB
X6RJP6	120	K	0.0785996	0.786574	TAGLN2
A0A024R3M1	119	K	-0.0785996	0.78996	THYN1
P02042	96	K	-0.0785996	0.78996	HBD
Q53GN4	437	K	-0.118768	0.793809	WDR1
Q99497	62	K	-0.0885326	0.798054	PARK7
P62937	49	K	0.0835661	0.809187	PPIA
X5D2T3	42	K	0.0642576	0.811022	RPL10
P58107	2234	K	-0.0942602	0.815132	EPPK1
Q4TZM4	92	K	0.0799795	0.822848	HBB
A0A024R882	93	K	0.0592911	0.827312	STOM
Q9BYT8	273	K	0.0592911	0.827312	NLN
A0A2U3TZL5	66	K	-0.0592911	0.827312	CD59
V9HWF4	322	K	-0.0592911	0.827312	HEL-S-68p
V9HWB8	367	K	0.144801	0.835552	HEL-S-30
A0A1B0GWE8	285	K	0.0592911	0.839948	CTSD
Q9Y4Y9	20	K	-0.0592911	0.839948	LSM5
P32119	177	K	-0.0592911	0.839948	PRDX2
Q562W2	35	K	0.128386	0.840217	ACT
A0A024R3T8	142	K	-0.0682925	0.84277	PARP1
P01024	633	K	-0.0632316	0.852079	C3
A0A0B4J2B5	98	K	-0.0816934	0.856505	IGHV3OR16-9
H0YK54	161	K	0.070918	0.862971	ZFAND6
Q9NVI7	329	K	-0.0487219	0.863816	ATAD3A
Q99795	143	K	-0.06635	0.866605	GPA33
Q6FHZ0	91	K	-0.0592068	0.871235	MDH2
Q71U36	304	K	-0.115945	0.876644	TUBA1A
P63244	212	K	0.0623344	0.882699	RACK1
P25789	67	K	-0.0568228	0.891434	PSMA4
V9HWF4	322	K	0.0317703	0.914277	HEL-S-68p
V9HWI5	44	K	-0.0338627	0.9172	HEL-S-15
A0A024R608	27	K	-0.0547321	0.924332	RPLP1
P02768	75	K	0.0406086	0.927878	ALB
P68366	352	K	0.0247356	0.952153	TUBA4A
P32119	177	K	-0.0222358	0.957084	PRDX2
P01859	101	K	0.0254768	0.967421	IGHG2
A0A0K0K1H8	215	K	0.0165688	0.968719	HEL-S-71p
P21333	2289	K	-0.0122471	0.971146	FLNA
Q562R1	119	K	-0.00941256	0.975319	ACTBL2
Q6NS95	151	K	-0.00958774	0.976296	IGL@
A0A024R1K7	28	K	-0.00768161	0.984394	YWHAH
V9HWK1	33	K	0.00496649	0.986411	HEL-S-49
V9HWB4	435	K	-0.0037136	0.990874	HEL-S-89n
A0A6Q8PH20	270	K	0.00122314	0.997534	CAST
V9HWB8	475	K	0.000924953	0.998469	HEL-S-30
Q15121	24	K	8.32667e-17	1	PEA15
P16403	17	K	8.32667e-17	1	H1-2
P07355	10	K	1.11022e-16	1	ANXA2
P49458	52	K	8.32667e-17	1	SRP9
Q00839	609	K	8.32667e-17	1	HNRNPU
Q9UK41	58	K	8.32667e-17	1	VPS28
P20700	111	K	8.32667e-17	1	LMNB1
Q5TZP7	103	K	8.32667e-17	1	APEX1
Q9Y5K6	544	K	3.33067e-16	1	CD2AP
D6RF35	402	K	8.32667e-17	1	GC
P23229	961	K	8.32667e-17	1	ITGA6
S4R3N1	56	K	8.32667e-17	1	HSPE1-MOB4
A0A024R396	43	K	0	1	C11orf54
A0A0S2Z5K8	43	K	8.32667e-17	1	STRBP
P40189	374	K	8.32667e-17	1	IL6ST
Q9P000	163	K	0	1	COMMD9
Q09666	3164	K	8.32667e-17	1	AHNAK
L8EB08	189	K	8.32667e-17	1	HLA-DQA1
A0A678ZGK1	162	K	8.32667e-17	1	HLA-DQA1
P15924	478	K	8.32667e-17	1	DSP
A0A024R1A4	82	K	8.32667e-17	1	UBE2L3
S4R3H4	674	K	0	1	ACIN1
A0A0C4DFM1	82	K	0	1	TM9SF4
Q00688	127	K	8.32667e-17	1	FKBP3
Q96G03	492	K	8.32667e-17	1	PGM2
Q5T5X7	142	K	8.32667e-17	1	BEND3
E9PKZ0	92	K	1.66533e-16	1	RPL8
P13639	594	K	8.32667e-17	1	EEF2
Q9UQ03	417	K	8.32667e-17	1	CORO2B
Q4TZM4	92	K	8.32667e-17	1	HBB
D3VVB6	145	K	8.32667e-17	1	ATXN3
P63244	212	K	1.66533e-16	1	RACK1
Q14651	380	K	8.32667e-17	1	PLS1
A7XYQ1	593	K	8.32667e-17	1	SOBP
H3BUX2	120	K	0	1	CYB5B
D6REC9	144	K	0	1	THOC3
Q14477	18	K	8.32667e-17	1	HBB
P02790	411	K	8.32667e-17	1	HPX
A0A024R850	234	K	8.32667e-17	1	MRRF
Q99623	147	K	8.32667e-17	1	PHB2
A0A024R6M6	324	K	8.32667e-17	1	BAG5
A0A0A0MR02	45	K	8.32667e-17	1	VDAC2
V9HWF6	148	K	8.32667e-17	1	HEL-S-153w
Q14204	2589	K	2.77556e-16	1	DYNC1H1
Q86VP6	574	K	1.66533e-16	1	CAND1
Q9NZJ9	133	K	8.32667e-17	1	NUDT4
Q8N4J7	8	K	8.32667e-17	1	LOC648987
Q9Y6R7	1476	K	8.32667e-17	1	FCGBP
P13645	201	K	8.32667e-17	1	KRT10
A0A6B7KQ98	210	K	8.32667e-17	1	HLA-B
P16422	106	K	0	1	EPCAM
A0A2L0RI76	262	K	1.66533e-16	1	IVD
Q6FHZ4	286	K	8.32667e-17	1	LGALS4
O75369	2044	K	8.32667e-17	1	FLNB
O75369	2058	K	0	1	FLNB
O60232	133	K	8.32667e-17	1	ZNRD2
P01024	556	K	8.32667e-17	1	C3
P36405	115	K	8.32667e-17	1	ARL3
P35232	63	K	0	1	PHB1
Q8TCS8	407	K	8.32667e-17	1	PNPT1
A0A024R734	61	K	8.32667e-17	1	NFAT5
P54709	194	K	1.66533e-16	1	ATP1B3
A6NFN9	315	K	8.32667e-17	1	ANKUB1
Q6NUN0	101	K	0	1	ACSM5
Q14242	348	K	8.32667e-17	1	SELPLG
Q99497	99	K	1.66533e-16	1	PARK7
Q5TZP7	203	K	0	1	APEX1
Q9BTZ2	92	K	8.32667e-17	1	DHRS4
J3KS54	420	K	8.32667e-17	1	FLII
A0A6Q8KRG2	765	K	8.32667e-17	1	GOLGA2
Q9H2W6	61	K	8.32667e-17	1	MRPL46
Q8IUI8	90	K	0	1	CRLF3
P01024	1155	K	0	1	C3
A0A024QZN4	316	K	8.32667e-17	1	VCL
Q16370	23	K	8.32667e-17	1	CTNNA1
P51911	66	K	8.32667e-17	1	CNN1
V9HWN7	289	K	8.32667e-17	1	HEL-S-87p
Q53GL6	55	K	1.66533e-16	1	RALY
Q5TDF0	117	K	0	1	NTPCR
P13645	266	K	8.32667e-17	1	KRT10
