# Supplementary material for: KAT8-catalyzed lactylation contributes to eEF1A2-mediated protein synthesis and colorectal carcinogenesis
Source: Research Square preprint supplement (doi:10.21203/rs.3.rs-2177254/v1), 2022-11-01
Supplement: Supplementary file 5 [file ff7d94da1acb2be5dce4904c.xlsx]

## Sheet: Sheet1
Table S3	List of proteins interacted with eEF1A2
Protein FDR Confidence: Combined	Accession	Description
High	P63261	Actin, cytoplasmic 2 OS=Homo sapiens OX=9606 GN=ACTG1 PE=1 SV=1
High	Q53G99	Beta actin variant (Fragment) OS=Homo sapiens OX=9606 PE=2 SV=1
High	Q53GK6	Beta actin variant (Fragment) OS=Homo sapiens OX=9606 PE=2 SV=1
High	B4DW52	cDNA FLJ55253, highly similar to Actin, cytoplasmic 1 OS=Homo sapiens OX=9606 PE=2 SV=1
High	A0A6Q8PFE4	Actin, cytoplasmic 1 OS=Homo sapiens OX=9606 GN=ACTB PE=1 SV=1
High	Q05639	Elongation factor 1-alpha 2 OS=Homo sapiens OX=9606 GN=EEF1A2 PE=1 SV=1
High	A0A024RCN6	Valyl-tRNA synthetase OS=Homo sapiens OX=9606 GN=VARS PE=1 SV=1
High	A0A7I2V4F0	ATP-dependent RNA helicase DDX1 OS=Homo sapiens OX=9606 GN=DDX1 PE=1 SV=1
High	B4E0T8	cDNA FLJ59649, highly similar to Myosin-18A OS=Homo sapiens OX=9606 PE=2 SV=1
High	H6VRG3	Cytokeratin-1 OS=Homo sapiens OX=9606 GN=KRT1 PE=3 SV=1
High	V9HVZ7	Epididymis luminal protein 176 OS=Homo sapiens OX=9606 GN=HEL-176 PE=2 SV=1
High	A0A1B0GVI3	Keratin, type I cytoskeletal 10 OS=Homo sapiens OX=9606 GN=KRT10 PE=1 SV=2
High	Q13813	Spectrin alpha chain, non-erythrocytic 1 OS=Homo sapiens OX=9606 GN=SPTAN1 PE=1 SV=3
High	Q53HQ7	Elongation factor 1-alpha (Fragment) OS=Homo sapiens OX=9606 PE=2 SV=1
High	Q9Y3I0	RNA-splicing ligase RtcB homolog OS=Homo sapiens OX=9606 GN=RTCB PE=1 SV=1
High	P35527	Keratin, type I cytoskeletal 9 OS=Homo sapiens OX=9606 GN=KRT9 PE=1 SV=3
High	P35908	Keratin, type II cytoskeletal 2 epidermal OS=Homo sapiens OX=9606 GN=KRT2 PE=1 SV=2
High	Q53GE9	Elongation factor 1-alpha (Fragment) OS=Homo sapiens OX=9606 PE=2 SV=1
High	M0QY43	Myosin-14 (Fragment) OS=Homo sapiens OX=9606 GN=MYH14 PE=1 SV=8
High	P68133	Actin, alpha skeletal muscle OS=Homo sapiens OX=9606 GN=ACTA1 PE=1 SV=1
High	P26641	Elongation factor 1-gamma OS=Homo sapiens OX=9606 GN=EEF1G PE=1 SV=3
High	A0A0A0MS51	Actin-depolymerizing factor OS=Homo sapiens OX=9606 GN=GSN PE=1 SV=1
High	B7Z992	Actin-depolymerizing factor OS=Homo sapiens OX=9606 PE=2 SV=1
High	B2ZZ89	Spectrin beta chain OS=Homo sapiens OX=9606 GN=SPTBN1 PE=2 SV=1
High	Q96DE1	Uncharacterized protein (Fragment) OS=Homo sapiens OX=9606 PE=2 SV=1
High	P67936	Tropomyosin alpha-4 chain OS=Homo sapiens OX=9606 GN=TPM4 PE=1 SV=3
High	B2RDE1	cDNA, FLJ96568, highly similar to Homo sapiens tropomyosin 3 (TPM3), mRNA OS=Homo sapiens OX=9606 PE=2 SV=1
High	P54886	Delta-1-pyrroline-5-carboxylate synthase OS=Homo sapiens OX=9606 GN=ALDH18A1 PE=1 SV=2
High	P63267	Actin, gamma-enteric smooth muscle OS=Homo sapiens OX=9606 GN=ACTG2 PE=1 SV=1
High	P27694	Replication protein A 70 kDa DNA-binding subunit OS=Homo sapiens OX=9606 GN=RPA1 PE=1 SV=2
High	A0A0S2Z4I4	Tropomyosin 3 isoform 3 (Fragment) OS=Homo sapiens OX=9606 GN=TPM3 PE=2 SV=1
High	P49327	Fatty acid synthase OS=Homo sapiens OX=9606 GN=FASN PE=1 SV=3
High	B3KUD3	cDNA FLJ39583 fis, clone SKMUS2004897, highly similar to ACTIN, ALPHA SKELETAL MUSCLE OS=Homo sapiens OX=9606 PE=2 SV=1
High	D3DWK1	Eukaryotic translation elongation factor 1 delta (Guanine nucleotide exchange protein), isoform CRA_b OS=Homo sapiens OX=9606 GN=EEF1D PE=3 SV=1
High	A0A0S2Z4G8	Tropomyosin 3 isoform 2 OS=Homo sapiens OX=9606 GN=TPM3 PE=2 SV=1
High	P02533	Keratin, type I cytoskeletal 14 OS=Homo sapiens OX=9606 GN=KRT14 PE=1 SV=4
High	Q00839	Heterogeneous nuclear ribonucleoprotein U OS=Homo sapiens OX=9606 GN=HNRNPU PE=1 SV=6
High	O14647	Chromodomain-helicase-DNA-binding protein 2 OS=Homo sapiens OX=9606 GN=CHD2 PE=1 SV=2
High	A0A2R8YHD2	Tropomyosin alpha-4 chain (Fragment) OS=Homo sapiens OX=9606 GN=TPM4 PE=1 SV=2
High	Q8IUB0	CTCL tumor antigen HD-CL-08 OS=Homo sapiens OX=9606 PE=2 SV=1
High	P05787	Keratin, type II cytoskeletal 8 OS=Homo sapiens OX=9606 GN=KRT8 PE=1 SV=7
High	J3KN67	Tropomyosin alpha-3 chain OS=Homo sapiens OX=9606 GN=TPM3 PE=1 SV=1
High	B4DNA0	3'-phosphate/5'-hydroxy nucleic acid ligase OS=Homo sapiens OX=9606 PE=2 SV=1
High	Q5TCU3	Tropomyosin beta chain OS=Homo sapiens OX=9606 GN=TPM2 PE=1 SV=1
High	A0A0S2Z428	HCG2039812, isoform CRA_b (Fragment) OS=Homo sapiens OX=9606 GN=KRT6A PE=2 SV=1
High	A7XZE4	Beta tropomyosin isoform OS=Homo sapiens OX=9606 GN=TPM2 PE=1 SV=1
High	A0A024QZJ6	Myosin, heavy polypeptide 11, smooth muscle, isoform CRA_b OS=Homo sapiens OX=9606 GN=MYH11 PE=3 SV=1
High	H7BYY1	Tropomyosin 1 (Alpha), isoform CRA_m OS=Homo sapiens OX=9606 GN=TPM1 PE=1 SV=1
High	P08779	Keratin, type I cytoskeletal 16 OS=Homo sapiens OX=9606 GN=KRT16 PE=1 SV=4
High	B4DWT5	cDNA FLJ50720, highly similar to Homo sapiens tropomyosin 3 (TPM3), transcript variant 2, mRNA OS=Homo sapiens OX=9606 PE=2 SV=1
High	P04259	Keratin, type II cytoskeletal 6B OS=Homo sapiens OX=9606 GN=KRT6B PE=1 SV=5
High	P29692	Elongation factor 1-delta OS=Homo sapiens OX=9606 GN=EEF1D PE=1 SV=5
High	P07437	Tubulin beta chain OS=Homo sapiens OX=9606 GN=TUBB PE=1 SV=2
High	A0A0K0K1I0	Epididymis secretory protein Li 265 OS=Homo sapiens OX=9606 GN=HEL-S-265 PE=2 SV=1
High	P13647	Keratin, type II cytoskeletal 5 OS=Homo sapiens OX=9606 GN=KRT5 PE=1 SV=3
High	Q8IZ29	Tubulin beta chain OS=Homo sapiens OX=9606 GN=TUBB2C PE=2 SV=1
High	Q5HYL6	Uncharacterized protein DKFZp686E1899 OS=Homo sapiens OX=9606 GN=DKFZp686E1899 PE=2 SV=1
High	Q8WWM7	Ataxin-2-like protein OS=Homo sapiens OX=9606 GN=ATXN2L PE=1 SV=2
High	H3BUF6	Ataxin-2-like protein OS=Homo sapiens OX=9606 GN=ATXN2L PE=1 SV=1
High	Q14247	Src substrate cortactin OS=Homo sapiens OX=9606 GN=CTTN PE=1 SV=2
High	V9HW22	Epididymis luminal protein 33 OS=Homo sapiens OX=9606 GN=HEL-S-72p PE=2 SV=1
High	Q5JP53	Tubulin beta chain OS=Homo sapiens OX=9606 GN=TUBB PE=1 SV=1
High	P13010	X-ray repair cross-complementing protein 5 OS=Homo sapiens OX=9606 GN=XRCC5 PE=1 SV=3
High	H0YK48	Tropomyosin alpha-1 chain OS=Homo sapiens OX=9606 GN=TPM1 PE=1 SV=1
High	O00571	ATP-dependent RNA helicase DDX3X OS=Homo sapiens OX=9606 GN=DDX3X PE=1 SV=3
High	Q8NCA5	Protein FAM98A OS=Homo sapiens OX=9606 GN=FAM98A PE=1 SV=2
High	Q549M8	RNA transcription, translation and transport factor protein OS=Homo sapiens OX=9606 GN=C14orf166 PE=2 SV=1
High	P15924	Desmoplakin OS=Homo sapiens OX=9606 GN=DSP PE=1 SV=3
High	P07355	Annexin A2 OS=Homo sapiens OX=9606 GN=ANXA2 PE=1 SV=2
High	B4E3P1	cDNA FLJ57036, highly similar to Homo sapiens tropomyosin 2 (beta) (TPM2), transcript variant 2, mRNA OS=Homo sapiens OX=9606 PE=2 SV=1
High	P12956	X-ray repair cross-complementing protein 6 OS=Homo sapiens OX=9606 GN=XRCC6 PE=1 SV=2
High	A0A024R5M3	Cortactin, isoform CRA_c OS=Homo sapiens OX=9606 GN=CTTN PE=4 SV=1
High	Q13885	Tubulin beta-2A chain OS=Homo sapiens OX=9606 GN=TUBB2A PE=1 SV=1
High	Q7Z417	Nuclear fragile X mental retardation-interacting protein 2 OS=Homo sapiens OX=9606 GN=NUFIP2 PE=1 SV=1
High	P08727	Keratin, type I cytoskeletal 19 OS=Homo sapiens OX=9606 GN=KRT19 PE=1 SV=4
High	Q562R1	Beta-actin-like protein 2 OS=Homo sapiens OX=9606 GN=ACTBL2 PE=1 SV=2
High	V9HWB4	78 kDa glucose-regulated protein OS=Homo sapiens OX=9606 GN=HEL-S-89n PE=2 SV=1
High	F5H5D3	Tubulin alpha chain OS=Homo sapiens OX=9606 GN=TUBA1C PE=1 SV=1
High	Q09666	Neuroblast differentiation-associated protein AHNAK OS=Homo sapiens OX=9606 GN=AHNAK PE=1 SV=2
High	O14646	Chromodomain-helicase-DNA-binding protein 1 OS=Homo sapiens OX=9606 GN=CHD1 PE=1 SV=2
High	Q13707	ACTA2 protein (Fragment) OS=Homo sapiens OX=9606 GN=ACTA2 PE=3 SV=1
High	P31943	Heterogeneous nuclear ribonucleoprotein H OS=Homo sapiens OX=9606 GN=HNRNPH1 PE=1 SV=4
High	G8JLA2	Myosin light polypeptide 6 OS=Homo sapiens OX=9606 GN=MYL6 PE=1 SV=1
High	A0A024RD80	Heat shock protein 90kDa alpha (Cytosolic), class B member 1, isoform CRA_a OS=Homo sapiens OX=9606 GN=HSP90AB1 PE=3 SV=1
High	P60660	Myosin light polypeptide 6 OS=Homo sapiens OX=9606 GN=MYL6 PE=1 SV=2
High	E9PL71	Elongation factor 1-delta (Fragment) OS=Homo sapiens OX=9606 GN=EEF1D PE=1 SV=1
High	P02768	Albumin OS=Homo sapiens OX=9606 GN=ALB PE=1 SV=2
High	A0A0G2JIW1	Heat shock 70 kDa protein 1B OS=Homo sapiens OX=9606 GN=HSPA1B PE=1 SV=1
High	O15523	ATP-dependent RNA helicase DDX3Y OS=Homo sapiens OX=9606 GN=DDX3Y PE=1 SV=2
High	O43148	mRNA cap guanine-N7 methyltransferase OS=Homo sapiens OX=9606 GN=RNMT PE=1 SV=1
High	Q9UE89	Beta-actin (Fragment) OS=Homo sapiens OX=9606 PE=2 SV=1
High	H0YAR2	Polyadenylate-binding protein OS=Homo sapiens OX=9606 GN=PABPC1 PE=1 SV=2
High	P15927	Replication protein A 32 kDa subunit OS=Homo sapiens OX=9606 GN=RPA2 PE=1 SV=1
High	Q562L9	Actin-like protein (Fragment) OS=Homo sapiens OX=9606 GN=ACT PE=4 SV=1
High	O15027	Protein transport protein Sec16A OS=Homo sapiens OX=9606 GN=SEC16A PE=1 SV=4
High	B2R7E8	cDNA, FLJ93412, highly similar to Homo sapiens replication protein A2, 32kDa (RPA2), mRNA OS=Homo sapiens OX=9606 PE=2 SV=1
High	A0A5H1ZRQ2	RNA helicase OS=Homo sapiens OX=9606 GN=DDX17 PE=1 SV=2
High	B7Z2Z1	cDNA FLJ59523, highly similar to Scaffold attachment factor B OS=Homo sapiens OX=9606 PE=2 SV=1
High	A0A4D5RBH1	Tr-type G domain-containing protein OS=Homo sapiens OX=9606 PE=4 SV=1
High	A0A024R3W7	Elongation factor 1-beta OS=Homo sapiens OX=9606 GN=EEF1B2 PE=3 SV=1
High	Q8WUA2	Peptidyl-prolyl cis-trans isomerase-like 4 OS=Homo sapiens OX=9606 GN=PPIL4 PE=1 SV=1
High	Q562M3	Actin-like protein (Fragment) OS=Homo sapiens OX=9606 GN=ACT PE=4 SV=1
High	Q16577	Elongation factor 1-alpha 1 OS=Homo sapiens OX=9606 GN=PTI-1 PE=2 SV=1
High	A8K7F6	RNA helicase OS=Homo sapiens OX=9606 PE=2 SV=1
High	Q16643	Drebrin OS=Homo sapiens OX=9606 GN=DBN1 PE=1 SV=4
High	H3BSK9	Ataxin-2-like protein (Fragment) OS=Homo sapiens OX=9606 GN=ATXN2L PE=1 SV=1
High	B4DI39	cDNA FLJ54328, highly similar to Heat shock 70 kDa protein 1 OS=Homo sapiens OX=9606 PE=2 SV=1
High	P68366	Tubulin alpha-4A chain OS=Homo sapiens OX=9606 GN=TUBA4A PE=1 SV=1
High	Q13509	Tubulin beta-3 chain OS=Homo sapiens OX=9606 GN=TUBB3 PE=1 SV=2
High	P05783	Keratin, type I cytoskeletal 18 OS=Homo sapiens OX=9606 GN=KRT18 PE=1 SV=2
High	P26196	Probable ATP-dependent RNA helicase DDX6 OS=Homo sapiens OX=9606 GN=DDX6 PE=1 SV=2
High	Q562L6	Actin-like protein (Fragment) OS=Homo sapiens OX=9606 GN=ACT PE=4 SV=1
High	B7Z4V2	75 kDa glucose-regulated protein OS=Homo sapiens OX=9606 PE=2 SV=1
High	P14649	Myosin light chain 6B OS=Homo sapiens OX=9606 GN=MYL6B PE=1 SV=1
High	Q8TBR3	Fusion (Involved in t(1216) in malignant liposarcoma) OS=Homo sapiens OX=9606 GN=FUS PE=2 SV=1
High	Q04695	Keratin, type I cytoskeletal 17 OS=Homo sapiens OX=9606 GN=KRT17 PE=1 SV=2
High	Q562Z4	Actin-like protein (Fragment) OS=Homo sapiens OX=9606 GN=ACT PE=4 SV=1
High	A0A384ME17	Elongation factor Tu OS=Homo sapiens OX=9606 GN=TUFM PE=2 SV=1
High	A5A3E0	POTE ankyrin domain family member F OS=Homo sapiens OX=9606 GN=POTEF PE=1 SV=2
High	P13639	Elongation factor 2 OS=Homo sapiens OX=9606 GN=EEF2 PE=1 SV=4
High	Q06830	Peroxiredoxin-1 OS=Homo sapiens OX=9606 GN=PRDX1 PE=1 SV=1
High	Q6IQ30	Polyadenylate-binding protein OS=Homo sapiens OX=9606 GN=PABPC4 PE=2 SV=1
High	A0A024R228	Heterogeneous nuclear ribonucleoprotein K OS=Homo sapiens OX=9606 GN=HNRPK PE=4 SV=1
High	B0QYK0	RNA-binding protein EWS OS=Homo sapiens OX=9606 GN=EWSR1 PE=1 SV=1
High	A0A0S2Z487	Junction plakoglobin (Fragment) OS=Homo sapiens OX=9606 GN=JUP PE=2 SV=1
High	B2R7T8	F-actin-capping protein subunit beta OS=Homo sapiens OX=9606 PE=2 SV=1
High	O95678	Keratin, type II cytoskeletal 75 OS=Homo sapiens OX=9606 GN=KRT75 PE=1 SV=2
High	X5D2M8	Major vault protein (Fragment) OS=Homo sapiens OX=9606 GN=MVP PE=2 SV=1
High	P0CG39	POTE ankyrin domain family member J OS=Homo sapiens OX=9606 GN=POTEJ PE=3 SV=1
High	A0A7I2V535	Non-POU domain-containing octamer-binding protein OS=Homo sapiens OX=9606 GN=NONO PE=1 SV=1
High	Q02413	Desmoglein-1 OS=Homo sapiens OX=9606 GN=DSG1 PE=1 SV=2
High	A0A024R566	Splicing factor 1 OS=Homo sapiens OX=9606 GN=SF1 PE=3 SV=1
High	Q92804	TATA-binding protein-associated factor 2N OS=Homo sapiens OX=9606 GN=TAF15 PE=1 SV=1
High	A0A024RAI1	Actin-like protein 3 OS=Homo sapiens OX=9606 GN=ACTR3 PE=3 SV=1
High	E5KNY5	Leucine-rich PPR-motif containing OS=Homo sapiens OX=9606 GN=LRPPRC PE=4 SV=1
High	Q6ZMU5	Tripartite motif-containing protein 72 OS=Homo sapiens OX=9606 GN=TRIM72 PE=1 SV=2
High	E7EU96	Casein kinase II subunit alpha OS=Homo sapiens OX=9606 GN=CSNK2A1 PE=1 SV=1
High	P25705	ATP synthase subunit alpha, mitochondrial OS=Homo sapiens OX=9606 GN=ATP5F1A PE=1 SV=1
High	A0A7I2YQN2	Heterogeneous nuclear ribonucleoprotein Q OS=Homo sapiens OX=9606 GN=SYNCRIP PE=1 SV=1
High	P52597	Heterogeneous nuclear ribonucleoprotein F OS=Homo sapiens OX=9606 GN=HNRNPF PE=1 SV=3
High	P52907	F-actin-capping protein subunit alpha-1 OS=Homo sapiens OX=9606 GN=CAPZA1 PE=1 SV=3
High	A0A024R7L5	UPF1 OS=Homo sapiens OX=9606 GN=UPF1 PE=2 SV=1
High	A0A7P0TBE2	Dihydrolipoyllysine-residue acetyltransferase component of pyruvate dehydrogenase complex, mitochondrial OS=Homo sapiens OX=9606 GN=DLAT PE=4 SV=1
High	O95429	BAG family molecular chaperone regulator 4 OS=Homo sapiens OX=9606 GN=BAG4 PE=1 SV=1
High	P0CG38	POTE ankyrin domain family member I OS=Homo sapiens OX=9606 GN=POTEI PE=3 SV=1
High	Q15149	Plectin OS=Homo sapiens OX=9606 GN=PLEC PE=1 SV=3
High	Q01804	OTU domain-containing protein 4 OS=Homo sapiens OX=9606 GN=OTUD4 PE=1 SV=4
High	A8MXE8	Retinoic acid-induced protein 1 (Fragment) OS=Homo sapiens OX=9606 GN=RAI1 PE=1 SV=1
High	H0Y8G5	Heterogeneous nuclear ribonucleoprotein D0 (Fragment) OS=Homo sapiens OX=9606 GN=HNRNPD PE=1 SV=8
High	O94832	Unconventional myosin-Id OS=Homo sapiens OX=9606 GN=MYO1D PE=1 SV=2
High	A8K5K0	cDNA FLJ78309, highly similar to Homo sapiens heterogeneous nuclear ribonucleoprotein U-like 1 (HNRPUL1), transcript variant 1, mRNA OS=Homo sapiens OX=9606 PE=2 SV=1
High	K9JA46	Epididymis luminal secretory protein 52 OS=Homo sapiens OX=9606 GN=EL52 PE=2 SV=1
High	P04792	Heat shock protein beta-1 OS=Homo sapiens OX=9606 GN=HSPB1 PE=1 SV=2
High	P28289	Tropomodulin-1 OS=Homo sapiens OX=9606 GN=TMOD1 PE=1 SV=1
High	Q9Y3F4	Serine-threonine kinase receptor-associated protein OS=Homo sapiens OX=9606 GN=STRAP PE=1 SV=1
High	Q9Y314	Nitric oxide synthase-interacting protein OS=Homo sapiens OX=9606 GN=NOSIP PE=1 SV=1
High	H0Y4R1	Inosine-5'-monophosphate dehydrogenase OS=Homo sapiens OX=9606 GN=IMPDH2 PE=1 SV=2
High	Q9NRR4	Ribonuclease 3 OS=Homo sapiens OX=9606 GN=DROSHA PE=1 SV=2
High	Q0QEN7	ATP synthase subunit beta (Fragment) OS=Homo sapiens OX=9606 GN=ATP5B PE=2 SV=1
High	Q9BSV4	SFPQ protein (Fragment) OS=Homo sapiens OX=9606 GN=SFPQ PE=2 SV=2
High	P22061	Protein-L-isoaspartate(D-aspartate) O-methyltransferase OS=Homo sapiens OX=9606 GN=PCMT1 PE=1 SV=4
High	H7BY36	RNA-binding protein EWS (Fragment) OS=Homo sapiens OX=9606 GN=EWSR1 PE=1 SV=1
High	P05141	ADP/ATP translocase 2 OS=Homo sapiens OX=9606 GN=SLC25A5 PE=1 SV=7
High	A4D1U3	Single-stranded DNA-binding protein, mitochondrial OS=Homo sapiens OX=9606 GN=SSBP1 PE=2 SV=1
High	P04406	Glyceraldehyde-3-phosphate dehydrogenase OS=Homo sapiens OX=9606 GN=GAPDH PE=1 SV=3
High	O75131	Copine-3 OS=Homo sapiens OX=9606 GN=CPNE3 PE=1 SV=1
High	Q2F838	Eukaryotic translation elongation factor 1 gamma (Fragment) OS=Homo sapiens OX=9606 PE=2 SV=1
High	B9EGI2	Myosin phosphatase Rho interacting protein OS=Homo sapiens OX=9606 GN=MPRIP PE=2 SV=1
High	B2R6U8	Cleavage and polyadenylation specificity factor subunit 5 OS=Homo sapiens OX=9606 PE=2 SV=1
High	Q53HL1	Myosin regulatory light chain MRCL3 variant (Fragment) OS=Homo sapiens OX=9606 PE=2 SV=1
High	A0A5F9ZHW5	Ataxin-2 OS=Homo sapiens OX=9606 GN=ATXN2 PE=1 SV=1
High	P12035	Keratin, type II cytoskeletal 3 OS=Homo sapiens OX=9606 GN=KRT3 PE=1 SV=3
High	P19474	E3 ubiquitin-protein ligase TRIM21 OS=Homo sapiens OX=9606 GN=TRIM21 PE=1 SV=1
High	Q6NS35	EEF1A1 protein OS=Homo sapiens OX=9606 GN=EEF1A1 PE=2 SV=1
High	A8K6D4	NAD(+) kinase OS=Homo sapiens OX=9606 PE=2 SV=1
High	Q9HCE1	Helicase MOV-10 OS=Homo sapiens OX=9606 GN=MOV10 PE=1 SV=2
High	Q96I25	Splicing factor 45 OS=Homo sapiens OX=9606 GN=RBM17 PE=1 SV=1
High	Q562V5	Actin-like protein (Fragment) OS=Homo sapiens OX=9606 GN=ACT PE=4 SV=1
High	P47755	F-actin-capping protein subunit alpha-2 OS=Homo sapiens OX=9606 GN=CAPZA2 PE=1 SV=3
High	F8WJN3	Cleavage and polyadenylation specificity factor subunit 6 OS=Homo sapiens OX=9606 GN=CPSF6 PE=1 SV=1
High	Q8IVM0	Coiled-coil domain-containing protein 50 OS=Homo sapiens OX=9606 GN=CCDC50 PE=1 SV=1
High	A4D275	Actin-related protein 2/3 complex subunit OS=Homo sapiens OX=9606 GN=ARPC1B PE=2 SV=1
High	Q9BYX7	Putative beta-actin-like protein 3 OS=Homo sapiens OX=9606 GN=POTEKP PE=5 SV=1
High	P22626	Heterogeneous nuclear ribonucleoproteins A2/B1 OS=Homo sapiens OX=9606 GN=HNRNPA2B1 PE=1 SV=2
High	Q12986	Transcriptional repressor NF-X1 OS=Homo sapiens OX=9606 GN=NFX1 PE=1 SV=2
High	L0R5C4	Alternative protein POTEM OS=Homo sapiens OX=9606 GN=POTEM PE=3 SV=1
High	P38159	RNA-binding motif protein, X chromosome OS=Homo sapiens OX=9606 GN=RBMX PE=1 SV=3
High	P61160	Actin-related protein 2 OS=Homo sapiens OX=9606 GN=ACTR2 PE=1 SV=1
High	Q5BKZ1	DBIRD complex subunit ZNF326 OS=Homo sapiens OX=9606 GN=ZNF326 PE=1 SV=2
High	A0A0S2Z377	Annexin (Fragment) OS=Homo sapiens OX=9606 GN=ANXA6 PE=2 SV=1
High	P62424	60S ribosomal protein L7a OS=Homo sapiens OX=9606 GN=RPL7A PE=1 SV=2
High	Q3ZCM7	Tubulin beta-8 chain OS=Homo sapiens OX=9606 GN=TUBB8 PE=1 SV=2
High	Q10570	Cleavage and polyadenylation specificity factor subunit 1 OS=Homo sapiens OX=9606 GN=CPSF1 PE=1 SV=2
High	E7EQG2	RNA helicase OS=Homo sapiens OX=9606 GN=EIF4A2 PE=1 SV=1
High	B2R4R0	Histone H4 OS=Homo sapiens OX=9606 GN=HIST1H4J PE=2 SV=1
High	O15144	Actin-related protein 2/3 complex subunit 2 OS=Homo sapiens OX=9606 GN=ARPC2 PE=1 SV=1
High	A0A2R8Y6J3	60S ribosomal protein L5 (Fragment) OS=Homo sapiens OX=9606 GN=RPL5 PE=1 SV=1
High	P27708	CAD protein OS=Homo sapiens OX=9606 GN=CAD PE=1 SV=3
High	Q9NYF8	Bcl-2-associated transcription factor 1 OS=Homo sapiens OX=9606 GN=BCLAF1 PE=1 SV=2
High	Q6I9V5	ADP/ATP translocase OS=Homo sapiens OX=9606 GN=SLC25A6 PE=2 SV=1
High	P55795	Heterogeneous nuclear ribonucleoprotein H2 OS=Homo sapiens OX=9606 GN=HNRNPH2 PE=1 SV=1
High	Q8N1N4	Keratin, type II cytoskeletal 78 OS=Homo sapiens OX=9606 GN=KRT78 PE=1 SV=2
High	K4ENJ5	Beta actin (Fragment) OS=Homo sapiens OX=9606 PE=4 SV=1
High	P17987	T-complex protein 1 subunit alpha OS=Homo sapiens OX=9606 GN=TCP1 PE=1 SV=1
High	Q8NEY8	Periphilin-1 OS=Homo sapiens OX=9606 GN=PPHLN1 PE=1 SV=2
High	Q15365	Poly(rC)-binding protein 1 OS=Homo sapiens OX=9606 GN=PCBP1 PE=1 SV=2
High	B4DI54	cDNA FLJ56386, highly similar to Heat shock 70 kDa protein 1L OS=Homo sapiens OX=9606 PE=2 SV=1
High	Q9Y2W1	Thyroid hormone receptor-associated protein 3 OS=Homo sapiens OX=9606 GN=THRAP3 PE=1 SV=2
High	P62136	Serine/threonine-protein phosphatase PP1-alpha catalytic subunit OS=Homo sapiens OX=9606 GN=PPP1CA PE=1 SV=1
High	B4DPV7	Cysteinyl-tRNA synthetase OS=Homo sapiens OX=9606 PE=2 SV=1
High	Q9UJV9	Probable ATP-dependent RNA helicase DDX41 OS=Homo sapiens OX=9606 GN=DDX41 PE=1 SV=2
High	Q9BV61	TRAP1 protein (Fragment) OS=Homo sapiens OX=9606 GN=TRAP1 PE=2 SV=2
High	F8W0B5	Ataxin-2 (Fragment) OS=Homo sapiens OX=9606 GN=ATXN2 PE=1 SV=4
High	A0A140VK00	Testicular tissue protein Li 227 OS=Homo sapiens OX=9606 PE=2 SV=1
High	B4E0E1	Poly [ADP-ribose] polymerase OS=Homo sapiens OX=9606 PE=2 SV=1
High	K7ERE3	Keratin, type I cytoskeletal 13 OS=Homo sapiens OX=9606 GN=KRT13 PE=1 SV=1
High	B7Z695	cDNA FLJ52742, highly similar to Periphilin-1 OS=Homo sapiens OX=9606 PE=2 SV=1
High	P38919	Eukaryotic initiation factor 4A-III OS=Homo sapiens OX=9606 GN=EIF4A3 PE=1 SV=4
High	Q9UKV8	Protein argonaute-2 OS=Homo sapiens OX=9606 GN=AGO2 PE=1 SV=3
High	Q8WX93	Palladin OS=Homo sapiens OX=9606 GN=PALLD PE=1 SV=3
High	B4DN41	DEAD box protein 5 OS=Homo sapiens OX=9606 PE=2 SV=1
High	P27635	60S ribosomal protein L10 OS=Homo sapiens OX=9606 GN=RPL10 PE=1 SV=4
High	Q14222	EEF1A protein (Fragment) OS=Homo sapiens OX=9606 GN=EEF1A PE=2 SV=1
High	Q52LJ0	Protein FAM98B OS=Homo sapiens OX=9606 GN=FAM98B PE=1 SV=2
High	A0A024RAC5	Epididymis secretory sperm binding protein OS=Homo sapiens OX=9606 GN=RCC2 PE=2 SV=1
High	A1A4E9	Keratin 13 OS=Homo sapiens OX=9606 GN=KRT13 PE=2 SV=1
High	A0A0C4DG89	RNA helicase OS=Homo sapiens OX=9606 GN=DDX46 PE=1 SV=1
High	P29508	Serpin B3 OS=Homo sapiens OX=9606 GN=SERPINB3 PE=1 SV=2
High	P53621	Coatomer subunit alpha OS=Homo sapiens OX=9606 GN=COPA PE=1 SV=2
High	A0A384NY64	Epididymis secretory sperm binding protein OS=Homo sapiens OX=9606 PE=2 SV=1
High	A0A024RDB2	Ras-GTPase activating protein SH3 domain-binding protein 2, isoform CRA_b OS=Homo sapiens OX=9606 GN=G3BP2 PE=4 SV=1
High	Q96HS1	Serine/threonine-protein phosphatase PGAM5, mitochondrial OS=Homo sapiens OX=9606 GN=PGAM5 PE=1 SV=2
High	Q07666	KH domain-containing, RNA-binding, signal transduction-associated protein 1 OS=Homo sapiens OX=9606 GN=KHDRBS1 PE=1 SV=1
High	Q08188	Protein-glutamine gamma-glutamyltransferase E OS=Homo sapiens OX=9606 GN=TGM3 PE=1 SV=4
High	O94916	Nuclear factor of activated T-cells 5 OS=Homo sapiens OX=9606 GN=NFAT5 PE=1 SV=1
High	H7C0N4	Splicing factor 1 (Fragment) OS=Homo sapiens OX=9606 GN=SF1 PE=1 SV=1
High	A0A7I2V599	60 kDa chaperonin OS=Homo sapiens OX=9606 GN=HSPD1 PE=1 SV=1
High	P11182	Lipoamide acyltransferase component of branched-chain alpha-keto acid dehydrogenase complex, mitochondrial OS=Homo sapiens OX=9606 GN=DBT PE=1 SV=3
High	A0A0S2Z4Z0	RNA binding motif protein 14 isoform 1 (Fragment) OS=Homo sapiens OX=9606 GN=RBM14 PE=2 SV=1
High	P36873	Serine/threonine-protein phosphatase PP1-gamma catalytic subunit OS=Homo sapiens OX=9606 GN=PPP1CC PE=1 SV=1
High	Q15366	Poly(rC)-binding protein 2 OS=Homo sapiens OX=9606 GN=PCBP2 PE=1 SV=1
High	P55735	Protein SEC13 homolog OS=Homo sapiens OX=9606 GN=SEC13 PE=1 SV=3
High	Q3MHD2	Protein LSM12 homolog OS=Homo sapiens OX=9606 GN=LSM12 PE=1 SV=2
High	B7ZKK7	eIF2AK2 protein OS=Homo sapiens OX=9606 GN=EIF2AK2 PE=2 SV=1
High	P51991	Heterogeneous nuclear ribonucleoprotein A3 OS=Homo sapiens OX=9606 GN=HNRNPA3 PE=1 SV=2
High	A0A6Q8PGI6	Diadenosine tetraphosphate synthetase OS=Homo sapiens OX=9606 GN=GARS1 PE=1 SV=1
High	O43823	A-kinase anchor protein 8 OS=Homo sapiens OX=9606 GN=AKAP8 PE=1 SV=1
High	Q96EB3	EEF1A1 protein (Fragment) OS=Homo sapiens OX=9606 GN=EEF1A1 PE=2 SV=1
High	Q6FHF5	Proliferating cell nuclear antigen (Fragment) OS=Homo sapiens OX=9606 GN=PCNA PE=2 SV=1
High	A0A087WY61	Nuclear mitotic apparatus protein 1 OS=Homo sapiens OX=9606 GN=NUMA1 PE=1 SV=1
High	P62140	Serine/threonine-protein phosphatase PP1-beta catalytic subunit OS=Homo sapiens OX=9606 GN=PPP1CB PE=1 SV=3
High	Q08211	ATP-dependent RNA helicase A OS=Homo sapiens OX=9606 GN=DHX9 PE=1 SV=4
High	Q96F86	Enhancer of mRNA-decapping protein 3 OS=Homo sapiens OX=9606 GN=EDC3 PE=1 SV=1
High	A0A6Q8PFJ0	Prelamin-A/C OS=Homo sapiens OX=9606 GN=LMNA PE=1 SV=1
High	A0A0S2Z410	Epididymis secretory sperm binding protein (Fragment) OS=Homo sapiens OX=9606 GN=HSD17B10 PE=2 SV=1
High	B3KUU7	cDNA FLJ40663 fis, clone THYMU2020289, highly similar to Dual specificity protein kinase CLK3 OS=Homo sapiens OX=9606 PE=2 SV=1
High	P62987	Ubiquitin-60S ribosomal protein L40 OS=Homo sapiens OX=9606 GN=UBA52 PE=1 SV=2
High	P06702	Protein S100-A9 OS=Homo sapiens OX=9606 GN=S100A9 PE=1 SV=1
High	Q5JR94	40S ribosomal protein S8 OS=Homo sapiens OX=9606 GN=RPS8 PE=2 SV=1
High	Q53F48	Heterogeneous nuclear ribonucleoprotein H3 isoform a variant (Fragment) OS=Homo sapiens OX=9606 PE=2 SV=1
High	O15042	U2 snRNP-associated SURP motif-containing protein OS=Homo sapiens OX=9606 GN=U2SURP PE=1 SV=2
High	Q562X2	Actin-like protein (Fragment) OS=Homo sapiens OX=9606 GN=ACT PE=4 SV=1
High	F8VZX2	Poly(rC)-binding protein 2 OS=Homo sapiens OX=9606 GN=PCBP2 PE=1 SV=1
High	Q6UN15	Pre-mRNA 3'-end-processing factor FIP1 OS=Homo sapiens OX=9606 GN=FIP1L1 PE=1 SV=1
High	B3KN06	Coronin OS=Homo sapiens OX=9606 PE=2 SV=1
High	Q9BTL3	RNA guanine-N7 methyltransferase activating subunit OS=Homo sapiens OX=9606 GN=RAMAC PE=1 SV=1
High	Q96BS4	FBL protein (Fragment) OS=Homo sapiens OX=9606 GN=FBL PE=2 SV=2
High	J3KTL2	Serine/arginine-rich splicing factor 1 OS=Homo sapiens OX=9606 GN=SRSF1 PE=1 SV=1
High	B4DV79	Eukaryotic translation initiation factor 3 subunit B OS=Homo sapiens OX=9606 GN=EIF3B PE=2 SV=1
High	O95714	E3 ubiquitin-protein ligase HERC2 OS=Homo sapiens OX=9606 GN=HERC2 PE=1 SV=2
High	Q6N096	Uncharacterized protein DKFZp686I15196 OS=Homo sapiens OX=9606 GN=DKFZp686I15196 PE=2 SV=1
High	Q92945	Far upstream element-binding protein 2 OS=Homo sapiens OX=9606 GN=KHSRP PE=1 SV=4
High	P63244	Receptor of activated protein C kinase 1 OS=Homo sapiens OX=9606 GN=RACK1 PE=1 SV=3
High	O95816	BAG family molecular chaperone regulator 2 OS=Homo sapiens OX=9606 GN=BAG2 PE=1 SV=1
High	P19012	Keratin, type I cytoskeletal 15 OS=Homo sapiens OX=9606 GN=KRT15 PE=1 SV=3
High	P12273	Prolactin-inducible protein OS=Homo sapiens OX=9606 GN=PIP PE=1 SV=1
High	Q86V81	THO complex subunit 4 OS=Homo sapiens OX=9606 GN=ALYREF PE=1 SV=3
High	P52292	Importin subunit alpha-1 OS=Homo sapiens OX=9606 GN=KPNA2 PE=1 SV=1
High	Q5T749	Keratinocyte proline-rich protein OS=Homo sapiens OX=9606 GN=KPRP PE=1 SV=1
High	Q13151	Heterogeneous nuclear ribonucleoprotein A0 OS=Homo sapiens OX=9606 GN=HNRNPA0 PE=1 SV=1
High	Q5QNW6	Histone H2B type 2-F OS=Homo sapiens OX=9606 GN=H2BC18 PE=1 SV=3
High	B3KM90	cDNA FLJ10529 fis, clone NT2RP2000965, highly similar to Targeting protein for Xklp2 OS=Homo sapiens OX=9606 PE=2 SV=1
High	P32322	Pyrroline-5-carboxylate reductase 1, mitochondrial OS=Homo sapiens OX=9606 GN=PYCR1 PE=1 SV=2
High	A0A7I2YQF8	Eukaryotic translation initiation factor 3 subunit I OS=Homo sapiens OX=9606 GN=EIF3I PE=1 SV=1
High	B5BU25	U2 snRNP auxiliary factor large subunit OS=Homo sapiens OX=9606 GN=U2AF2 PE=2 SV=1
High	Q9P2E9	Ribosome-binding protein 1 OS=Homo sapiens OX=9606 GN=RRBP1 PE=1 SV=5
High	O95433	Activator of 90 kDa heat shock protein ATPase homolog 1 OS=Homo sapiens OX=9606 GN=AHSA1 PE=1 SV=1
High	A0A161I202	Lactotransferrin OS=Homo sapiens OX=9606 GN=LTF PE=2 SV=1
High	A0A024R1C1	RING-type E3 ubiquitin transferase OS=Homo sapiens OX=9606 GN=PPIL2 PE=3 SV=1
High	A0A024RBE8	Phosphate carrier protein, mitochondrial OS=Homo sapiens OX=9606 GN=SLC25A3 PE=2 SV=1
High	B4DY08	Heterogeneous nuclear ribonucleoproteins C1/C2 OS=Homo sapiens OX=9606 GN=HNRNPC PE=1 SV=1
High	A0A0S2Z5B2	Chromobox homolog 4 (Pc class homolog, Drosophila), isoform CRA_a (Fragment) OS=Homo sapiens OX=9606 GN=CBX4 PE=2 SV=1
High	A0A5C2GUP9	IG c1151_light_IGKV2D-29_IGKJ4 (Fragment) OS=Homo sapiens OX=9606 PE=2 SV=1
High	P19784	Casein kinase II subunit alpha' OS=Homo sapiens OX=9606 GN=CSNK2A2 PE=1 SV=1
High	V9HWB8	Pyruvate kinase OS=Homo sapiens OX=9606 GN=HEL-S-30 PE=2 SV=1
High	B2CIS9	Caspase 14, apoptosis-related cysteine peptidase OS=Homo sapiens OX=9606 GN=CASP14 PE=2 SV=1
High	Q7Z794	Keratin, type II cytoskeletal 1b OS=Homo sapiens OX=9606 GN=KRT77 PE=1 SV=3
High	Q8IWX8	Calcium homeostasis endoplasmic reticulum protein OS=Homo sapiens OX=9606 GN=CHERP PE=1 SV=3
High	K7EMD9	Keratin, type I cytoskeletal 13 (Fragment) OS=Homo sapiens OX=9606 GN=KRT13 PE=1 SV=1
High	P04183	Thymidine kinase, cytosolic OS=Homo sapiens OX=9606 GN=TK1 PE=1 SV=2
High	Q5T280	Putative methyltransferase C9orf114 OS=Homo sapiens OX=9606 GN=SPOUT1 PE=1 SV=3
High	Q16778	Histone H2B type 2-E OS=Homo sapiens OX=9606 GN=H2BC21 PE=1 SV=3
High	Q6KB66	Keratin, type II cytoskeletal 80 OS=Homo sapiens OX=9606 GN=KRT80 PE=1 SV=2
High	V9HW01	Epididymis secretory protein Li 310 OS=Homo sapiens OX=9606 GN=HEL-S-310 PE=2 SV=1
High	D3DSM4	Collagen, type XVIII, alpha 1, isoform CRA_d OS=Homo sapiens OX=9606 GN=COL18A1 PE=4 SV=1
High	P42285	Exosome RNA helicase MTR4 OS=Homo sapiens OX=9606 GN=MTREX PE=1 SV=3
High	B4DQ50	cDNA FLJ56823, highly similar to Protein-glutamine gamma-glutamyltransferase E OS=Homo sapiens OX=9606 PE=2 SV=1
High	V9HWC6	Peptidyl-prolyl cis-trans isomerase OS=Homo sapiens OX=9606 GN=HEL-S-39 PE=2 SV=1
High	B4DHK9	cDNA FLJ51656, highly similar to Actin-like protein 2 OS=Homo sapiens OX=9606 PE=2 SV=1
High	A6NLN1	Polypyrimidine tract-binding protein 1 OS=Homo sapiens OX=9606 GN=PTBP1 PE=1 SV=4
High	Q3B7A7	Trifunctional purine biosynthetic protein adenosine-3 OS=Homo sapiens OX=9606 GN=GART PE=2 SV=1
High	B2R9Y2	Coiled-coil domain-containing protein 55 OS=Homo sapiens OX=9606 PE=2 SV=1
High	O00425	Insulin-like growth factor 2 mRNA-binding protein 3 OS=Homo sapiens OX=9606 GN=IGF2BP3 PE=1 SV=2
High	D6RBZ0	Heterogeneous nuclear ribonucleoprotein A/B OS=Homo sapiens OX=9606 GN=HNRNPAB PE=1 SV=1
High	H0YHA7	60S ribosomal protein L18 (Fragment) OS=Homo sapiens OX=9606 GN=RPL18 PE=1 SV=1
High	A0A024R2L6	40S ribosomal protein SA OS=Homo sapiens OX=9606 GN=RPSA PE=3 SV=1
High	Q6MZS5	Uncharacterized protein DKFZp686A13234 (Fragment) OS=Homo sapiens OX=9606 GN=DKFZp686A13234 PE=2 SV=1
High	Q8TEX9	Importin-4 OS=Homo sapiens OX=9606 GN=IPO4 PE=1 SV=2
High	A0A5C2GC48	IGH + IGL c24_light_IGKV2D-29_IGKJ4 (Fragment) OS=Homo sapiens OX=9606 PE=2 SV=1
High	Q53XC0	Eukaryotic translation initiation factor 2 subunit 1 OS=Homo sapiens OX=9606 GN=EIF2S1 PE=2 SV=1
High	Q14331	Protein FRG1 OS=Homo sapiens OX=9606 GN=FRG1 PE=1 SV=1
High	B4DF70	cDNA FLJ60461, highly similar to Peroxiredoxin-2 OS=Homo sapiens OX=9606 PE=2 SV=1
High	A0A384MDR8	Pyruvate dehydrogenase E1 component subunit beta OS=Homo sapiens OX=9606 PE=2 SV=1
High	Q53EP0	Fibronectin type III domain-containing protein 3B OS=Homo sapiens OX=9606 GN=FNDC3B PE=1 SV=2
High	B2R9K8	cDNA, FLJ94440, highly similar to Homo sapiens chaperonin containing TCP1, subunit 6A (zeta 1)(CCT6A), mRNA OS=Homo sapiens OX=9606 PE=2 SV=1
High	B2R9L6	cDNA, FLJ94450, highly similar to Homo sapiens cyclin-dependent kinase 9 (CDC2-related kinase) (CDK9), mRNA OS=Homo sapiens OX=9606 PE=2 SV=1
High	P31151	Protein S100-A7 OS=Homo sapiens OX=9606 GN=S100A7 PE=1 SV=4
High	P30041	Peroxiredoxin-6 OS=Homo sapiens OX=9606 GN=PRDX6 PE=1 SV=3
High	B4DM74	60S ribosomal protein L18a OS=Homo sapiens OX=9606 PE=2 SV=1
High	B4E0S6	RNA helicase OS=Homo sapiens OX=9606 PE=2 SV=1
High	B5MDF5	GTP-binding nuclear protein Ran OS=Homo sapiens OX=9606 GN=RAN PE=1 SV=1
High	O15371	Eukaryotic translation initiation factor 3 subunit D OS=Homo sapiens OX=9606 GN=EIF3D PE=1 SV=1
High	Q9BZR9	E3 ubiquitin-protein ligase TRIM8 OS=Homo sapiens OX=9606 GN=TRIM8 PE=1 SV=2
High	P06733	Alpha-enolase OS=Homo sapiens OX=9606 GN=ENO1 PE=1 SV=2
High	A0A024R4X0	NADH-cytochrome b5 reductase OS=Homo sapiens OX=9606 GN=CYB5R3 PE=3 SV=1
High	P41091	Eukaryotic translation initiation factor 2 subunit 3 OS=Homo sapiens OX=9606 GN=EIF2S3 PE=1 SV=3
High	Q9BUT9	MAPK regulated corepressor interacting protein 2 OS=Homo sapiens OX=9606 GN=MCRIP2 PE=1 SV=2
High	F8W6I7	Helix-destabilizing protein OS=Homo sapiens OX=9606 GN=HNRNPA1 PE=1 SV=2
High	Q0KKI6	Immunoblobulin light chain (Fragment) OS=Homo sapiens OX=9606 PE=1 SV=1
High	J3KRX5	60S ribosomal protein L17 (Fragment) OS=Homo sapiens OX=9606 GN=RPL17 PE=1 SV=1
High	O00159	Unconventional myosin-Ic OS=Homo sapiens OX=9606 GN=MYO1C PE=1 SV=4
High	O43684	Mitotic checkpoint protein BUB3 OS=Homo sapiens OX=9606 GN=BUB3 PE=1 SV=1
High	P62917	60S ribosomal protein L8 OS=Homo sapiens OX=9606 GN=RPL8 PE=1 SV=2
High	Q6UXN9	WD repeat-containing protein 82 OS=Homo sapiens OX=9606 GN=WDR82 PE=1 SV=1
High	B4DLJ3	cDNA FLJ51495, highly similar to ADP-ribosylation factor 5 OS=Homo sapiens OX=9606 PE=2 SV=1
High	P05109	Protein S100-A8 OS=Homo sapiens OX=9606 GN=S100A8 PE=1 SV=1
High	A0A7P0TAE1	Endoplasmin OS=Homo sapiens OX=9606 GN=HSP90B1 PE=4 SV=1
High	Q8IV63	Inactive serine/threonine-protein kinase VRK3 OS=Homo sapiens OX=9606 GN=VRK3 PE=1 SV=2
High	O00330	Pyruvate dehydrogenase protein X component, mitochondrial OS=Homo sapiens OX=9606 GN=PDHX PE=1 SV=3
High	B2RWM5	Calponin (Fragment) OS=Homo sapiens OX=9606 GN=CNN2 PE=2 SV=1
High	P05388	60S acidic ribosomal protein P0 OS=Homo sapiens OX=9606 GN=RPLP0 PE=1 SV=1
High	A0A0S2Z3L2	P-type Ca(2+) transporter (Fragment) OS=Homo sapiens OX=9606 GN=ATP2A2 PE=2 SV=1
High	Q56VW8	Serine/threonine-protein phosphatase 2A 55 kDa regulatory subunit B OS=Homo sapiens OX=9606 PE=2 SV=1
High	P61204	ADP-ribosylation factor 3 OS=Homo sapiens OX=9606 GN=ARF3 PE=1 SV=2
High	Q13200	26S proteasome non-ATPase regulatory subunit 2 OS=Homo sapiens OX=9606 GN=PSMD2 PE=1 SV=3
High	Q53GD7	FUS interacting protein (Serine-arginine rich) 1 isoform 2 variant (Fragment) OS=Homo sapiens OX=9606 PE=2 SV=1
High	P50454	Serpin H1 OS=Homo sapiens OX=9606 GN=SERPINH1 PE=1 SV=2
High	A2A3R6	40S ribosomal protein S6 OS=Homo sapiens OX=9606 GN=RPS6 PE=2 SV=1
High	O15145	Actin-related protein 2/3 complex subunit 3 OS=Homo sapiens OX=9606 GN=ARPC3 PE=1 SV=3
High	P35568	Insulin receptor substrate 1 OS=Homo sapiens OX=9606 GN=IRS1 PE=1 SV=1
High	P23396	40S ribosomal protein S3 OS=Homo sapiens OX=9606 GN=RPS3 PE=1 SV=2
High	Q9NWH9	SAFB-like transcription modulator OS=Homo sapiens OX=9606 GN=SLTM PE=1 SV=2
High	P18085	ADP-ribosylation factor 4 OS=Homo sapiens OX=9606 GN=ARF4 PE=1 SV=3
High	A0A024R897	Actin-related protein 2/3 complex subunit 5 OS=Homo sapiens OX=9606 GN=ARPC5L PE=2 SV=1
High	Q1KMD3	Heterogeneous nuclear ribonucleoprotein U-like protein 2 OS=Homo sapiens OX=9606 GN=HNRNPUL2 PE=1 SV=1
High	X6RDA4	Paraspeckle component 1 (Fragment) OS=Homo sapiens OX=9606 GN=PSPC1 PE=1 SV=1
High	A8K3H8	cDNA FLJ77680, highly similar to Homo sapiens protein phosphatase 2 (formerly 2A), regulatory subunit A (PR 65), alpha isoform (PPP2R1A), mRNA OS=Homo sapiens OX=9606 PE=2 SV=1
High	Q9Y678	Coatomer subunit gamma-1 OS=Homo sapiens OX=9606 GN=COPG1 PE=1 SV=1
High	F5GY37	Prohibitin OS=Homo sapiens OX=9606 GN=PHB2 PE=1 SV=1
High	B3KM80	Nucleolin OS=Homo sapiens OX=9606 GN=NCL PE=2 SV=1
High	Q9Y5B9	FACT complex subunit SPT16 OS=Homo sapiens OX=9606 GN=SUPT16H PE=1 SV=1
High	Q8TAS0	ATP synthase subunit gamma (Fragment) OS=Homo sapiens OX=9606 PE=2 SV=1
High	A0A0J9YXU2	Elongation factor 1-delta (Fragment) OS=Homo sapiens OX=9606 GN=EEF1D PE=1 SV=1
High	E7EX17	Eukaryotic translation initiation factor 4B OS=Homo sapiens OX=9606 GN=EIF4B PE=1 SV=1
High	P06493	Cyclin-dependent kinase 1 OS=Homo sapiens OX=9606 GN=CDK1 PE=1 SV=3
High	A0A024R2Q4	Ribosomal protein L15 OS=Homo sapiens OX=9606 GN=RPL15 PE=3 SV=1
High	Q5QTS3	60S ribosomal protein L13a OS=Homo sapiens OX=9606 PE=2 SV=1
High	Q15717	ELAV-like protein 1 OS=Homo sapiens OX=9606 GN=ELAVL1 PE=1 SV=2
High	F5GY05	Constitutive coactivator of peroxisome proliferator-activated receptor gamma OS=Homo sapiens OX=9606 GN=FAM120B PE=1 SV=1
High	P00338	L-lactate dehydrogenase A chain OS=Homo sapiens OX=9606 GN=LDHA PE=1 SV=2
High	Q3ZCQ8	Mitochondrial import inner membrane translocase subunit TIM50 OS=Homo sapiens OX=9606 GN=TIMM50 PE=1 SV=2
High	P61962	DDB1- and CUL4-associated factor 7 OS=Homo sapiens OX=9606 GN=DCAF7 PE=1 SV=1
High	Q562L3	Actin-like protein (Fragment) OS=Homo sapiens OX=9606 GN=ACT PE=4 SV=1
High	Q9Y6M1	Insulin-like growth factor 2 mRNA-binding protein 2 OS=Homo sapiens OX=9606 GN=IGF2BP2 PE=1 SV=2
High	A0A024R6H0	Cleavage and polyadenylation specificity factor subunit 2 OS=Homo sapiens OX=9606 GN=CPSF2 PE=3 SV=1
High	A0A5C2GFI8	IGL c149_light_IGKV2-30_IGKJ1 (Fragment) OS=Homo sapiens OX=9606 PE=2 SV=1
High	C9JZR2	Catenin delta-1 OS=Homo sapiens OX=9606 GN=CTNND1 PE=1 SV=2
High	P18124	60S ribosomal protein L7 OS=Homo sapiens OX=9606 GN=RPL7 PE=1 SV=1
High	A0A5C2G1B5	IGL c2340_light_IGKV2D-29_IGKJ2 (Fragment) OS=Homo sapiens OX=9606 PE=2 SV=1
High	B4DXZ6	Fragile X mental retardation syndrome-related protein 1 OS=Homo sapiens OX=9606 GN=FXR1 PE=1 SV=1
High	O75940	Survival of motor neuron-related-splicing factor 30 OS=Homo sapiens OX=9606 GN=SMNDC1 PE=1 SV=1
High	P81605	Dermcidin OS=Homo sapiens OX=9606 GN=DCD PE=1 SV=2
High	Q01081	Splicing factor U2AF 35 kDa subunit OS=Homo sapiens OX=9606 GN=U2AF1 PE=1 SV=3
High	Q14974	Importin subunit beta-1 OS=Homo sapiens OX=9606 GN=KPNB1 PE=1 SV=2
High	Q6NUR7	Ezrin OS=Homo sapiens OX=9606 GN=EZR PE=2 SV=1
High	B7ZA12	cDNA, FLJ79026, highly similar to Dual specificity protein kinase CLK1 (EC2.7.12.1) OS=Homo sapiens OX=9606 PE=2 SV=1
High	Q9Y230	RuvB-like 2 OS=Homo sapiens OX=9606 GN=RUVBL2 PE=1 SV=3
High	Q8NF17	FLJ00385 protein (Fragment) OS=Homo sapiens OX=9606 GN=FLJ00385 PE=1 SV=1
High	A0A3B3ITJ4	Heterogeneous nuclear ribonucleoprotein L (Fragment) OS=Homo sapiens OX=9606 GN=HNRNPL PE=1 SV=1
High	A1L0S8	CROCC protein (Fragment) OS=Homo sapiens OX=9606 GN=CROCC PE=2 SV=1
High	J3KPD3	RNA binding motif protein 7, isoform CRA_c OS=Homo sapiens OX=9606 GN=RBM7 PE=1 SV=1
High	P61247	40S ribosomal protein S3a OS=Homo sapiens OX=9606 GN=RPS3A PE=1 SV=2
High	A0A090N7V5	Gamma-glutamylcyclotransferase OS=Homo sapiens OX=9606 GN=C7orf24 PE=4 SV=1
High	Q59GA1	Splicing factor, arginine/serine-rich 10 (Transformer 2 homolog, Drosophila) variant (Fragment) OS=Homo sapiens OX=9606 PE=2 SV=1
High	Q6IPH7	60S ribosomal protein L14 OS=Homo sapiens OX=9606 GN=RPL14 PE=2 SV=1
High	Q9Y383	Putative RNA-binding protein Luc7-like 2 OS=Homo sapiens OX=9606 GN=LUC7L2 PE=1 SV=2
High	E7EVA0	Microtubule-associated protein OS=Homo sapiens OX=9606 GN=MAP4 PE=1 SV=1
High	Q9UP60	SNC73 protein OS=Homo sapiens OX=9606 GN=SNC73 PE=2 SV=1
High	A0A5F9ZHM4	L-lactate dehydrogenase OS=Homo sapiens OX=9606 GN=LDHB PE=1 SV=1
High	H0YIQ2	YLP motif-containing protein 1 (Fragment) OS=Homo sapiens OX=9606 GN=YLPM1 PE=1 SV=1
High	P30048	Thioredoxin-dependent peroxide reductase, mitochondrial OS=Homo sapiens OX=9606 GN=PRDX3 PE=1 SV=3
High	P28074	Proteasome subunit beta type-5 OS=Homo sapiens OX=9606 GN=PSMB5 PE=1 SV=3
High	Q9NZR1	Tropomodulin-2 OS=Homo sapiens OX=9606 GN=TMOD2 PE=1 SV=1
High	F8VV59	Nucleosome assembly protein 1-like 1 OS=Homo sapiens OX=9606 GN=NAP1L1 PE=1 SV=1
High	P29372	DNA-3-methyladenine glycosylase OS=Homo sapiens OX=9606 GN=MPG PE=1 SV=3
High	Q16629	Serine/arginine-rich splicing factor 7 OS=Homo sapiens OX=9606 GN=SRSF7 PE=1 SV=1
High	D0PNI1	Epididymis luminal protein 4 OS=Homo sapiens OX=9606 GN=YWHAZ PE=2 SV=1
High	P01040	Cystatin-A OS=Homo sapiens OX=9606 GN=CSTA PE=1 SV=1
High	O15160	DNA-directed RNA polymerases I and III subunit RPAC1 OS=Homo sapiens OX=9606 GN=POLR1C PE=1 SV=1
High	K7EMH1	60S ribosomal protein L22 (Fragment) OS=Homo sapiens OX=9606 GN=RPL22 PE=1 SV=1
High	B4E1V0	cDNA FLJ54839, highly similar to Lactotransferrin OS=Homo sapiens OX=9606 PE=2 SV=1
High	P35244	Replication protein A 14 kDa subunit OS=Homo sapiens OX=9606 GN=RPA3 PE=1 SV=1
High	F8WE88	Unconventional myosin-Va OS=Homo sapiens OX=9606 GN=MYO5A PE=1 SV=2
High	H0Y720	Trinucleotide repeat-containing gene 6B protein (Fragment) OS=Homo sapiens OX=9606 GN=TNRC6B PE=1 SV=1
High	C9JH19	Cathepsin D OS=Homo sapiens OX=9606 GN=CTSD PE=1 SV=2
High	F8W1S1	Keratin, type II cytoskeletal 74 OS=Homo sapiens OX=9606 GN=KRT74 PE=1 SV=1
High	P62913	60S ribosomal protein L11 OS=Homo sapiens OX=9606 GN=RPL11 PE=1 SV=2
High	Q59EC0	Adenosine deaminase, RNA-specific isoform ADAR-a variant (Fragment) OS=Homo sapiens OX=9606 PE=2 SV=1
High	A0A286YFJ8	Immunoglobulin heavy constant gamma 4 (Fragment) OS=Homo sapiens OX=9606 GN=IGHG4 PE=1 SV=1
High	Q9HB71	Calcyclin-binding protein OS=Homo sapiens OX=9606 GN=CACYBP PE=1 SV=2
High	Q96IR1	RPS4X protein (Fragment) OS=Homo sapiens OX=9606 GN=RPS4X PE=2 SV=2
High	Q12906	Interleukin enhancer-binding factor 3 OS=Homo sapiens OX=9606 GN=ILF3 PE=1 SV=3
High	P62081	40S ribosomal protein S7 OS=Homo sapiens OX=9606 GN=RPS7 PE=1 SV=1
High	Q86Y46	Keratin, type II cytoskeletal 73 OS=Homo sapiens OX=9606 GN=KRT73 PE=1 SV=1
High	A0A345WIR4	Cytochrome c oxidase subunit 2 OS=Homo sapiens OX=9606 GN=COX2 PE=3 SV=1
High	P36578	60S ribosomal protein L4 OS=Homo sapiens OX=9606 GN=RPL4 PE=1 SV=5
High	A0A0S2Z4G7	Nucleophosmin (Fragment) OS=Homo sapiens OX=9606 GN=NPM1 PE=2 SV=1
High	J3QQQ9	KOW domain-containing protein OS=Homo sapiens OX=9606 PE=3 SV=1
High	K7ELP0	Tropomyosin alpha-4 chain (Fragment) OS=Homo sapiens OX=9606 GN=TPM4 PE=1 SV=1
High	O95373	Importin-7 OS=Homo sapiens OX=9606 GN=IPO7 PE=1 SV=1
High	Q13242	Serine/arginine-rich splicing factor 9 OS=Homo sapiens OX=9606 GN=SRSF9 PE=1 SV=1
High	Q6P0P7	THRAP3 protein (Fragment) OS=Homo sapiens OX=9606 GN=THRAP3 PE=2 SV=1
High	A0A5C2GWK4	IG c1313_light_IGKV2D-28_IGKJ4 (Fragment) OS=Homo sapiens OX=9606 PE=2 SV=1
High	A0A5C2G1F4	IGL c1765_light_IGKV2-28_IGKJ1 (Fragment) OS=Homo sapiens OX=9606 PE=2 SV=1
High	V9HWI5	Cofilin, non-muscle isoform OS=Homo sapiens OX=9606 GN=HEL-S-15 PE=2 SV=1
High	Q96P63	Serpin B12 OS=Homo sapiens OX=9606 GN=SERPINB12 PE=1 SV=1
High	A0A024R1U4	RAB5C, member RAS oncogene family, isoform CRA_a OS=Homo sapiens OX=9606 GN=RAB5C PE=4 SV=1
High	Q9UK59	Lariat debranching enzyme OS=Homo sapiens OX=9606 GN=DBR1 PE=1 SV=2
High	Q13162	Peroxiredoxin-4 OS=Homo sapiens OX=9606 GN=PRDX4 PE=1 SV=1
High	Q9HB00	Desmocollin 1, isoform CRA_b OS=Homo sapiens OX=9606 GN=DSC1 PE=4 SV=1
High	B4DP80	NAD(P)H-hydrate epimerase OS=Homo sapiens OX=9606 GN=APOA1BP PE=2 SV=1
High	A0A2R8Y811	40S ribosomal protein S14 (Fragment) OS=Homo sapiens OX=9606 GN=RPS14 PE=1 SV=1
High	A0A7P0Z3Z5	DNA damage-binding protein 1 OS=Homo sapiens OX=9606 GN=DDB1 PE=4 SV=1
High	P59998	Actin-related protein 2/3 complex subunit 4 OS=Homo sapiens OX=9606 GN=ARPC4 PE=1 SV=3
High	B5B2P4	Nuclear factor of activated T-cells c2 isoform IA-IIS-deltaXa OS=Homo sapiens OX=9606 GN=NFATC2 PE=2 SV=1
High	P84090	Enhancer of rudimentary homolog OS=Homo sapiens OX=9606 GN=ERH PE=1 SV=1
High	Q86YZ3	Hornerin OS=Homo sapiens OX=9606 GN=HRNR PE=1 SV=2
High	Q9BU76	Multiple myeloma tumor-associated protein 2 OS=Homo sapiens OX=9606 GN=MMTAG2 PE=1 SV=1
High	P47929	Galectin-7 OS=Homo sapiens OX=9606 GN=LGALS7 PE=1 SV=2
High	A0A5C2GX58	IG c1533_light_IGKV2-30_IGKJ1 (Fragment) OS=Homo sapiens OX=9606 PE=2 SV=1
High	O75607	Nucleoplasmin-3 OS=Homo sapiens OX=9606 GN=NPM3 PE=1 SV=3
High	P62280	40S ribosomal protein S11 OS=Homo sapiens OX=9606 GN=RPS11 PE=1 SV=3
High	Q8N684	Cleavage and polyadenylation specificity factor subunit 7 OS=Homo sapiens OX=9606 GN=CPSF7 PE=1 SV=1
High	Q9C0J8	pre-mRNA 3' end processing protein WDR33 OS=Homo sapiens OX=9606 GN=WDR33 PE=1 SV=2
High	P04844	Dolichyl-diphosphooligosaccharide--protein glycosyltransferase subunit 2 OS=Homo sapiens OX=9606 GN=RPN2 PE=1 SV=3
High	Q5T7C4	High mobility group protein B1 OS=Homo sapiens OX=9606 GN=HMGB1 PE=1 SV=1
High	Q5D862	Filaggrin-2 OS=Homo sapiens OX=9606 GN=FLG2 PE=1 SV=1
High	Q2VPA0	Lon protease homolog (Fragment) OS=Homo sapiens OX=9606 GN=LONP1 PE=2 SV=1
High	A0A5C2GME1	IG c324_light_IGKV2D-29_IGKJ4 (Fragment) OS=Homo sapiens OX=9606 PE=2 SV=1
High	Q6PJ22	NAD(+) kinase (Fragment) OS=Homo sapiens OX=9606 GN=FLJ13052 PE=2 SV=1
High	A0A0K0K1L3	Epididymis secretory protein Li 307 (Fragment) OS=Homo sapiens OX=9606 GN=HEL-S-307 PE=2 SV=1
High	P33993	DNA replication licensing factor MCM7 OS=Homo sapiens OX=9606 GN=MCM7 PE=1 SV=4
High	Q9HAZ1	Dual specificity protein kinase CLK4 OS=Homo sapiens OX=9606 GN=CLK4 PE=1 SV=1
High	P21333	Filamin-A OS=Homo sapiens OX=9606 GN=FLNA PE=1 SV=4
High	A0A0A0N0L3	TAR DNA-binding protein 43 OS=Homo sapiens OX=9606 GN=TDP43 PE=2 SV=1
High	A0A384P5K2	Epididymis secretory sperm binding protein OS=Homo sapiens OX=9606 PE=2 SV=1
High	O95639	Cleavage and polyadenylation specificity factor subunit 4 OS=Homo sapiens OX=9606 GN=CPSF4 PE=1 SV=1
High	N0E4C7	Casein kinase II subunit beta OS=Homo sapiens OX=9606 GN=CSNK2B PE=2 SV=1
High	Q92620	Pre-mRNA-splicing factor ATP-dependent RNA helicase PRP16 OS=Homo sapiens OX=9606 GN=DHX38 PE=1 SV=2
High	Q02978	Mitochondrial 2-oxoglutarate/malate carrier protein OS=Homo sapiens OX=9606 GN=SLC25A11 PE=1 SV=3
High	Q71V99	Peptidyl-prolyl cis-trans isomerase OS=Homo sapiens OX=9606 PE=2 SV=1
High	Q9UHF1	Epidermal growth factor-like protein 7 OS=Homo sapiens OX=9606 GN=EGFL7 PE=1 SV=3
High	A0A024R8D7	Lipocalin 1 (Tear prealbumin), isoform CRA_a OS=Homo sapiens OX=9606 GN=LCN1 PE=3 SV=1
High	A0A024RBB5	Cysteine and glycine-rich protein 2, isoform CRA_a OS=Homo sapiens OX=9606 GN=CSRP2 PE=2 SV=1
High	A0A024R2K1	RAB5A, member RAS oncogene family, isoform CRA_a OS=Homo sapiens OX=9606 GN=RAB5A PE=4 SV=1
High	B4DUI5	Triosephosphate isomerase OS=Homo sapiens OX=9606 PE=2 SV=1
High	B5BUB1	RuvB-like helicase (Fragment) OS=Homo sapiens OX=9606 GN=RUVBL1 PE=2 SV=1
High	P62829	60S ribosomal protein L23 OS=Homo sapiens OX=9606 GN=RPL23 PE=1 SV=1
High	P26373	60S ribosomal protein L13 OS=Homo sapiens OX=9606 GN=RPL13 PE=1 SV=4
High	A0A024RCT9	High mobility group AT-hook 1, isoform CRA_b OS=Homo sapiens OX=9606 GN=HMGA1 PE=3 SV=1
High	D3DP78	Aspartate--tRNA ligase, cytoplasmic OS=Homo sapiens OX=9606 GN=DARS PE=3 SV=1
High	Q8IW75	Serpin A12 OS=Homo sapiens OX=9606 GN=SERPINA12 PE=1 SV=1
High	A0A1U9X8Y4	Chloride intracellular channel protein OS=Homo sapiens OX=9606 PE=3 SV=1
High	C9JF17	Apolipoprotein D (Fragment) OS=Homo sapiens OX=9606 GN=APOD PE=1 SV=1
High	A0A5C2GXH1	IG c1452_light_IGKV2D-28_IGKJ2 (Fragment) OS=Homo sapiens OX=9606 PE=2 SV=1
High	B4DDU6	CCT-epsilon OS=Homo sapiens OX=9606 PE=2 SV=1
High	A0A024RBA9	Ras-related protein Rab-21 OS=Homo sapiens OX=9606 GN=RAB21 PE=3 SV=1
High	P11387	DNA topoisomerase 1 OS=Homo sapiens OX=9606 GN=TOP1 PE=1 SV=2
High	P50990	T-complex protein 1 subunit theta OS=Homo sapiens OX=9606 GN=CCT8 PE=1 SV=4
High	P51571	Translocon-associated protein subunit delta OS=Homo sapiens OX=9606 GN=SSR4 PE=1 SV=1
High	Q15654	Thyroid receptor-interacting protein 6 OS=Homo sapiens OX=9606 GN=TRIP6 PE=1 SV=3
High	Q15182	Small nuclear ribonucleoprotein-associated protein OS=Homo sapiens OX=9606 GN=SNRPB PE=2 SV=1
High	B4DXL5	Replication termination factor 2 OS=Homo sapiens OX=9606 PE=2 SV=1
High	Q16777	Histone H2A type 2-C OS=Homo sapiens OX=9606 GN=H2AC20 PE=1 SV=4
High	A0A0S2Z5U6	Pyrroline-5-carboxylate reductase (Fragment) OS=Homo sapiens OX=9606 GN=PYCR2 PE=2 SV=1
High	Q6FIG4	RAB1B protein OS=Homo sapiens OX=9606 GN=RAB1B PE=2 SV=1
High	F4ZW63	NF45 OS=Homo sapiens OX=9606 PE=2 SV=1
High	W5ZR30	Transcription factor 20 OS=Homo sapiens OX=9606 GN=TCF20 PE=2 SV=1
High	Q8TAP9	M-phase-specific PLK1-interacting protein OS=Homo sapiens OX=9606 GN=MPLKIP PE=1 SV=1
High	B4E1P5	cDNA FLJ56599, highly similar to Eukaryotic translation initiation factor 2C3 OS=Homo sapiens OX=9606 PE=2 SV=1
High	O95793	Double-stranded RNA-binding protein Staufen homolog 1 OS=Homo sapiens OX=9606 GN=STAU1 PE=1 SV=2
High	A0A5C2FYY4	IGL c1884_light_IGKV2D-28_IGKJ5 (Fragment) OS=Homo sapiens OX=9606 PE=2 SV=1
High	A0A7I2YQG2	Ribosomal protein L19 OS=Homo sapiens OX=9606 GN=RPL19 PE=1 SV=1
High	A6QKW0	SHINC3 OS=Homo sapiens OX=9606 GN=SHINC3 PE=2 SV=1
High	Q01469	Fatty acid-binding protein 5 OS=Homo sapiens OX=9606 GN=FABP5 PE=1 SV=3
High	A0A5C2G0F2	IGL c2711_light_IGKV2-28_IGKJ2 (Fragment) OS=Homo sapiens OX=9606 PE=2 SV=1
High	B4DKJ0	cDNA FLJ58539, highly similar to Keratin, type II cytoskeletal 4 OS=Homo sapiens OX=9606 PE=2 SV=1
High	A4D2P0	Ras-related C3 botulinum toxin substrate 1 (Rho family, small GTP binding protein Rac1) OS=Homo sapiens OX=9606 GN=RAC1 PE=2 SV=1
High	A0A140TA32	C4a anaphylatoxin OS=Homo sapiens OX=9606 GN=C4A PE=1 SV=1
High	Q7L7L0	Histone H2A type 3 OS=Homo sapiens OX=9606 GN=H2AW PE=1 SV=3
High	Q9BQQ5	Ribosomal protein L27a OS=Homo sapiens OX=9606 GN=L27a PE=4 SV=1
High	H0YHX9	Nascent polypeptide-associated complex subunit alpha OS=Homo sapiens OX=9606 GN=NACA PE=1 SV=2
High	B0AZN7	cDNA, FLJ79477, highly similar to Protein-glutamine gamma-glutamyltransferase K OS=Homo sapiens OX=9606 PE=2 SV=1
High	A0A024RBK3	60S ribosomal protein L6 OS=Homo sapiens OX=9606 GN=RPL6 PE=3 SV=1
High	H7C144	Alpha-actinin-4 OS=Homo sapiens OX=9606 GN=ACTN4 PE=1 SV=2
High	B2R8F3	cDNA, FLJ93871, highly similar to Homo sapiens melanoma antigen, family B, 2 (MAGEB2), mRNA OS=Homo sapiens OX=9606 PE=2 SV=1
High	A0A087WVQ6	Clathrin heavy chain OS=Homo sapiens OX=9606 GN=CLTC PE=1 SV=1
High	Q9NPP6	Immunoglobulin heavy chain variant (Fragment) OS=Homo sapiens OX=9606 PE=2 SV=1
High	B3KN49	cDNA FLJ13562 fis, clone PLACE1008080, highly similar to Homo sapiens hexamethylene bis-acetamide inducible 1 (HEXIM1), mRNA OS=Homo sapiens OX=9606 PE=2 SV=1
High	P39023	60S ribosomal protein L3 OS=Homo sapiens OX=9606 GN=RPL3 PE=1 SV=2
High	O15014	Zinc finger protein 609 OS=Homo sapiens OX=9606 GN=ZNF609 PE=1 SV=2
High	A0A0A0MR02	Outer mitochondrial membrane protein porin 2 (Fragment) OS=Homo sapiens OX=9606 GN=VDAC2 PE=1 SV=1
High	A0A024R7V6	RAB2, member RAS oncogene family, isoform CRA_a OS=Homo sapiens OX=9606 GN=RAB2 PE=4 SV=1
High	A0A494C1E9	Nuclear factor NF-kappa-B p105 subunit OS=Homo sapiens OX=9606 GN=NFKB1 PE=1 SV=1
High	O60841	Eukaryotic translation initiation factor 5B OS=Homo sapiens OX=9606 GN=EIF5B PE=1 SV=4
High	Q6IPX5	40S ribosomal protein S2 OS=Homo sapiens OX=9606 GN=RPS2 PE=2 SV=1
High	Q6PIK1	IGL@ protein OS=Homo sapiens OX=9606 GN=IGL@ PE=1 SV=1
High	Q14444	Caprin-1 OS=Homo sapiens OX=9606 GN=CAPRIN1 PE=1 SV=2
High	P39656	Dolichyl-diphosphooligosaccharide--protein glycosyltransferase 48 kDa subunit OS=Homo sapiens OX=9606 GN=DDOST PE=1 SV=4
High	G3V1V4	Family with sequence similarity 112, member B, isoform CRA_b OS=Homo sapiens OX=9606 GN=GTSF1 PE=1 SV=1
High	A0A024R4M0	40S ribosomal protein S9 OS=Homo sapiens OX=9606 GN=RPS9 PE=1 SV=1
High	A7KAX9	Rho GTPase-activating protein 32 OS=Homo sapiens OX=9606 GN=ARHGAP32 PE=1 SV=1
High	O15511	Actin-related protein 2/3 complex subunit 5 OS=Homo sapiens OX=9606 GN=ARPC5 PE=1 SV=3
High	Q13595	Transformer-2 protein homolog alpha OS=Homo sapiens OX=9606 GN=TRA2A PE=1 SV=1
High	P62899	60S ribosomal protein L31 OS=Homo sapiens OX=9606 GN=RPL31 PE=1 SV=1
High	O14979	Heterogeneous nuclear ribonucleoprotein D-like OS=Homo sapiens OX=9606 GN=HNRNPDL PE=1 SV=3
High	C9JXA5	Guanine nucleotide-binding protein G(I)/G(S)/G(T) subunit beta-2 (Fragment) OS=Homo sapiens OX=9606 GN=GNB2 PE=1 SV=1
High	P09012	U1 small nuclear ribonucleoprotein A OS=Homo sapiens OX=9606 GN=SNRPA PE=1 SV=3
High	B1AH78	Ras-related C3 botulinum toxin substrate 2 (Fragment) OS=Homo sapiens OX=9606 GN=RAC2 PE=1 SV=1
High	B2R4I8	cDNA, FLJ92106, highly similar to Homo sapiens adaptor-related protein complex 3, sigma 1 subunit(AP3S1), mRNA OS=Homo sapiens OX=9606 PE=2 SV=1
High	Q9H7E2	Tudor domain-containing protein 3 OS=Homo sapiens OX=9606 GN=TDRD3 PE=1 SV=1
High	P26583	High mobility group protein B2 OS=Homo sapiens OX=9606 GN=HMGB2 PE=1 SV=2
High	V9HWE9	GST class-pi OS=Homo sapiens OX=9606 GN=HEL-S-22 PE=2 SV=1
High	P51149	Ras-related protein Rab-7a OS=Homo sapiens OX=9606 GN=RAB7A PE=1 SV=1
High	P62906	60S ribosomal protein L10a OS=Homo sapiens OX=9606 GN=RPL10A PE=1 SV=2
High	B2RD40	cDNA, FLJ96442, highly similar to Homo sapiens copine II (CPNE2), mRNA OS=Homo sapiens OX=9606 PE=2 SV=1
High	D3DV26	Calpactin I light chain (Fragment) OS=Homo sapiens OX=9606 GN=S100A10 PE=4 SV=1
High	B7Z6L0	Annexin OS=Homo sapiens OX=9606 PE=2 SV=1
High	Q86XZ4	Spermatogenesis-associated serine-rich protein 2 OS=Homo sapiens OX=9606 GN=SPATS2 PE=1 SV=1
High	P16403	Histone H1.2 OS=Homo sapiens OX=9606 GN=H1-2 PE=1 SV=2
High	P04040	Catalase OS=Homo sapiens OX=9606 GN=CAT PE=1 SV=3
High	Q562W2	Actin-like protein (Fragment) OS=Homo sapiens OX=9606 GN=ACT PE=4 SV=1
High	A0A087X2D0	Serine/arginine-rich-splicing factor 3 OS=Homo sapiens OX=9606 GN=SRSF3 PE=1 SV=1
High	A0A5C2GSY1	IG c604_light_IGKV3-15_IGKJ2 (Fragment) OS=Homo sapiens OX=9606 PE=2 SV=1
High	Q96NU7	Probable imidazolonepropionase OS=Homo sapiens OX=9606 GN=AMDHD1 PE=1 SV=2
High	B1AKQ8	Guanine nucleotide-binding protein G(I)/G(S)/G(T) subunit beta-1 (Fragment) OS=Homo sapiens OX=9606 GN=GNB1 PE=1 SV=8
High	P49247	Ribose-5-phosphate isomerase OS=Homo sapiens OX=9606 GN=RPIA PE=1 SV=3
High	B4DJ30	cDNA FLJ61290, highly similar to Neutral alpha-glucosidase AB OS=Homo sapiens OX=9606 PE=2 SV=1
High	Q6FI03	G3BP protein OS=Homo sapiens OX=9606 GN=G3BP PE=2 SV=1
High	Q00653	Nuclear factor NF-kappa-B p100 subunit OS=Homo sapiens OX=9606 GN=NFKB2 PE=1 SV=4
High	A8K517	40S ribosomal protein S23 OS=Homo sapiens OX=9606 GN=RPS23 PE=2 SV=1
High	Q12792	Twinfilin-1 OS=Homo sapiens OX=9606 GN=TWF1 PE=1 SV=3
High	O94905	Erlin-2 OS=Homo sapiens OX=9606 GN=ERLIN2 PE=1 SV=1
High	B4DNL3	cDNA FLJ53145, highly similar to Ankycorbin (Fragment) OS=Homo sapiens OX=9606 PE=2 SV=1
High	Q5U0I6	H.sapiens ras-related Hrab1A protein OS=Homo sapiens OX=9606 GN=RAB1A PE=2 SV=1
High	A0A2R8Y6I6	Dual-specificity kinase OS=Homo sapiens OX=9606 GN=DYRK1A PE=1 SV=1
High	K7EJV9	60S ribosomal protein L23a (Fragment) OS=Homo sapiens OX=9606 GN=RPL23A PE=1 SV=1
High	Q5U0A0	Proteasome subunit alpha type OS=Homo sapiens OX=9606 PE=2 SV=1
High	Q96EY1	DnaJ homolog subfamily A member 3, mitochondrial OS=Homo sapiens OX=9606 GN=DNAJA3 PE=1 SV=2
High	A0A0X9V9B3	MS-F1 light chain variable region (Fragment) OS=Homo sapiens OX=9606 PE=2 SV=1
High	Q9NZW5	Protein PALS2 OS=Homo sapiens OX=9606 GN=PALS2 PE=1 SV=2
High	Q13835	Plakophilin-1 OS=Homo sapiens OX=9606 GN=PKP1 PE=1 SV=2
High	M0R0R2	40S ribosomal protein S5 OS=Homo sapiens OX=9606 GN=RPS5 PE=1 SV=1
High	P61026	Ras-related protein Rab-10 OS=Homo sapiens OX=9606 GN=RAB10 PE=1 SV=1
High	G5E9A6	Ubiquitin carboxyl-terminal hydrolase OS=Homo sapiens OX=9606 GN=USP11 PE=1 SV=1
High	Q9NWB6	Arginine and glutamate-rich protein 1 OS=Homo sapiens OX=9606 GN=ARGLU1 PE=1 SV=1
High	S6AWD6	IgG L chain OS=Homo sapiens OX=9606 PE=2 SV=1
High	P58107	Epiplakin OS=Homo sapiens OX=9606 GN=EPPK1 PE=1 SV=3
High	J9R021	Eukaryotic translation initiation factor 3 subunit A OS=Homo sapiens OX=9606 GN=eIF3a PE=2 SV=1
High	Q58FF6	Putative heat shock protein HSP 90-beta 4 OS=Homo sapiens OX=9606 GN=HSP90AB4P PE=5 SV=1
High	A0A024QYX3	RNA binding motif (RNP1, RRM) protein 3, isoform CRA_c OS=Homo sapiens OX=9606 GN=RBM3 PE=4 SV=1
High	Q96GY0	Zinc finger C2HC domain-containing protein 1A OS=Homo sapiens OX=9606 GN=ZC2HC1A PE=1 SV=2
High	I3L3P7	40S ribosomal protein S15a OS=Homo sapiens OX=9606 GN=RPS15A PE=1 SV=1
High	A0A0J9YYL3	60 kDa poly(U)-binding-splicing factor (Fragment) OS=Homo sapiens OX=9606 GN=PUF60 PE=1 SV=1
High	P32969	60S ribosomal protein L9 OS=Homo sapiens OX=9606 GN=RPL9 PE=1 SV=1
High	B4DH21	cDNA FLJ58505, highly similar to Cyclin-T2 OS=Homo sapiens OX=9606 PE=2 SV=1
High	A0A286YEY4	Immunoglobulin heavy constant gamma 2 (Fragment) OS=Homo sapiens OX=9606 GN=IGHG2 PE=1 SV=1
High	Q6FGX3	RAB6A protein OS=Homo sapiens OX=9606 GN=RAB6A PE=2 SV=1
High	V9HWN7	Fructose-bisphosphate aldolase OS=Homo sapiens OX=9606 GN=HEL-S-87p PE=2 SV=1
High	A0A4D5RAG0	Annexin OS=Homo sapiens OX=9606 PE=3 SV=1
High	A0A075B6R9	Probable non-functional immunoglobulin kappa variable 2D-24 OS=Homo sapiens OX=9606 GN=IGKV2D-24 PE=1 SV=1
High	P11908	Ribose-phosphate pyrophosphokinase 2 OS=Homo sapiens OX=9606 GN=PRPS2 PE=1 SV=2
High	A0A024RBS1	GCN1 general control of amino-acid synthesis 1-like 1 (Yeast), isoform CRA_b OS=Homo sapiens OX=9606 GN=GCN1L1 PE=3 SV=1
High	Q53EY9	F-box only protein 22 isoform a variant (Fragment) OS=Homo sapiens OX=9606 PE=2 SV=1
High	D6W5E5	Orthodenticle homolog 1 (Drosophila), isoform CRA_a OS=Homo sapiens OX=9606 GN=OTX1 PE=4 SV=1
High	Q9H0A0	RNA cytidine acetyltransferase OS=Homo sapiens OX=9606 GN=NAT10 PE=1 SV=2
High	O75477	Erlin-1 OS=Homo sapiens OX=9606 GN=ERLIN1 PE=1 SV=2
High	P05089	Arginase-1 OS=Homo sapiens OX=9606 GN=ARG1 PE=1 SV=2
High	Q96AG4	Leucine-rich repeat-containing protein 59 OS=Homo sapiens OX=9606 GN=LRRC59 PE=1 SV=1
High	B2RD96	cDNA, FLJ96514 OS=Homo sapiens OX=9606 PE=2 SV=1
High	Q569I7	Uncharacterized protein OS=Homo sapiens OX=9606 PE=2 SV=1
High	Q6PKI6	YBX1 protein (Fragment) OS=Homo sapiens OX=9606 GN=YBX1 PE=2 SV=1
High	A0A0C4DGN4	Zymogen granule protein 16 homolog B OS=Homo sapiens OX=9606 GN=ZG16B PE=1 SV=1
High	Q8N355	IGL@ protein OS=Homo sapiens OX=9606 GN=IGL@ PE=1 SV=1
High	B4DP88	Serine hydroxymethyltransferase OS=Homo sapiens OX=9606 PE=2 SV=1
High	A2VCL5	Flotillin (Fragment) OS=Homo sapiens OX=9606 GN=FLOT1 PE=2 SV=1
High	Q9H7Z6	Histone acetyltransferase KAT8 OS=Homo sapiens OX=9606 GN=KAT8 PE=1 SV=2
High	B7Z5B0	cDNA FLJ51936, highly similar to Nef-associated factor 1 OS=Homo sapiens OX=9606 PE=2 SV=1
High	Q59GK9	60S ribosomal protein L21 (Fragment) OS=Homo sapiens OX=9606 PE=2 SV=1
High	Q53FV0	Prohibitin (Fragment) OS=Homo sapiens OX=9606 PE=2 SV=1
High	A0A5C2GDQ5	IGH c101_heavy__IGHV3-23_IGHD4-17_IGHJ4 (Fragment) OS=Homo sapiens OX=9606 PE=2 SV=1
High	F6RFD5	Actin-depolymerizing factor OS=Homo sapiens OX=9606 GN=DSTN PE=1 SV=1
High	P84243	Histone H3.3 OS=Homo sapiens OX=9606 GN=H3-3A PE=1 SV=2
High	Q92567	Protein FAM168A OS=Homo sapiens OX=9606 GN=FAM168A PE=1 SV=2
High	A0A024RB14	40S ribosomal protein S26 OS=Homo sapiens OX=9606 GN=RPS26 PE=3 SV=1
High	Q9Y295	Developmentally-regulated GTP-binding protein 1 OS=Homo sapiens OX=9606 GN=DRG1 PE=1 SV=1
High	B7Z3R7	cDNA FLJ55466, highly similar to G-rich sequence factor 1 OS=Homo sapiens OX=9606 PE=2 SV=1
High	Q8NDV7	Trinucleotide repeat-containing gene 6A protein OS=Homo sapiens OX=9606 GN=TNRC6A PE=1 SV=2
High	Q9Y5M8	Signal recognition particle receptor subunit beta OS=Homo sapiens OX=9606 GN=SRPRB PE=1 SV=3
High	P30050	60S ribosomal protein L12 OS=Homo sapiens OX=9606 GN=RPL12 PE=1 SV=1
High	A0A024RDL9	O-phosphoserine phosphohydrolase OS=Homo sapiens OX=9606 GN=PSPH PE=3 SV=1
High	B4DNB9	AP-2 complex subunit mu OS=Homo sapiens OX=9606 PE=2 SV=1
High	Q59H77	T-complex protein 1 subunit gamma (Fragment) OS=Homo sapiens OX=9606 PE=2 SV=1
High	C8C504	Beta-globin OS=Homo sapiens OX=9606 GN=HBB PE=3 SV=1
High	P38117	Electron transfer flavoprotein subunit beta OS=Homo sapiens OX=9606 GN=ETFB PE=1 SV=3
High	P48047	ATP synthase subunit O, mitochondrial OS=Homo sapiens OX=9606 GN=ATP5PO PE=1 SV=1
High	A0A7I2V5B2	NADH dehydrogenase [ubiquinone] 1 alpha subcomplex subunit 10, mitochondrial OS=Homo sapiens OX=9606 GN=NDUFA10 PE=1 SV=1
High	P61626	Lysozyme C OS=Homo sapiens OX=9606 GN=LYZ PE=1 SV=1
High	Q6ZVX7	F-box only protein 50 OS=Homo sapiens OX=9606 GN=NCCRP1 PE=1 SV=1
High	H7C3P7	Small monomeric GTPase (Fragment) OS=Homo sapiens OX=9606 GN=RALA PE=1 SV=1
High	P61106	Ras-related protein Rab-14 OS=Homo sapiens OX=9606 GN=RAB14 PE=1 SV=4
High	P50402	Emerin OS=Homo sapiens OX=9606 GN=EMD PE=1 SV=1
High	B4DNJ4	Urokinase-type plasminogen activator long chain A OS=Homo sapiens OX=9606 PE=2 SV=1
High	Q6NTE8	MRN complex-interacting protein OS=Homo sapiens OX=9606 GN=MRNIP PE=1 SV=2
High	L0R5B4	Alternative protein HNRNPUL1 OS=Homo sapiens OX=9606 GN=HNRNPUL1 PE=4 SV=1
High	A0A5C2GSW3	IG c102_light_IGLV1-44_IGLJ3 (Fragment) OS=Homo sapiens OX=9606 PE=2 SV=1
High	A0A087X0X3	Heterogeneous nuclear ribonucleoprotein M OS=Homo sapiens OX=9606 GN=HNRNPM PE=1 SV=1
High	Q9NQ29	Putative RNA-binding protein Luc7-like 1 OS=Homo sapiens OX=9606 GN=LUC7L PE=1 SV=1
High	B2RBC1	cDNA, FLJ95432, highly similar to Homo sapiens Alport syndrome, mental retardation, midfacehypoplasia and elliptocytosis chromosomal region, gene 1 (AMMECR1),mRNA OS=Homo sapiens OX=9606 PE=2 SV=1
High	A0A024R1S8	LIM and SH3 domain protein 1 OS=Homo sapiens OX=9606 GN=LASP1 PE=4 SV=1
High	Q9Y277	Voltage-dependent anion-selective channel protein 3 OS=Homo sapiens OX=9606 GN=VDAC3 PE=1 SV=1
High	Q1RMG2	Adenosylhomocysteinase OS=Homo sapiens OX=9606 GN=AHCY PE=2 SV=1
High	A0A024R5Z8	RAB11A, member RAS oncogene family, isoform CRA_a OS=Homo sapiens OX=9606 GN=RAB11A PE=4 SV=1
High	J3KR44	Ubiquitin thioesterase OS=Homo sapiens OX=9606 GN=OTUB1 PE=1 SV=2
High	Q7Z3Z0	Keratin, type I cytoskeletal 25 OS=Homo sapiens OX=9606 GN=KRT25 PE=1 SV=1
High	Q9Y2S7	Polymerase delta-interacting protein 2 OS=Homo sapiens OX=9606 GN=POLDIP2 PE=1 SV=1
High	B4DX78	RNA helicase OS=Homo sapiens OX=9606 PE=2 SV=1
High	A0A024R1K7	Tyrosine 3-monooxygenase/tryptophan 5-monooxygenase activation protein, eta polypeptide, isoform CRA_b OS=Homo sapiens OX=9606 GN=YWHAH PE=3 SV=1
High	V9HW96	CCT-beta OS=Homo sapiens OX=9606 GN=HEL-S-100n PE=2 SV=1
High	O43819	Protein SCO2 homolog, mitochondrial OS=Homo sapiens OX=9606 GN=SCO2 PE=1 SV=3
High	A0A075B6E4	Transcription cofactor vestigial-like protein 4 OS=Homo sapiens OX=9606 GN=VGLL4 PE=1 SV=1
High	V9HW90	Glutathione reductase OS=Homo sapiens OX=9606 GN=HEL-75 PE=2 SV=1
High	A0A5C2GFX4	IGH + IGL c71_light_IGKV1-9_IGKJ2 (Fragment) OS=Homo sapiens OX=9606 PE=2 SV=1
High	Q9Y315	Deoxyribose-phosphate aldolase OS=Homo sapiens OX=9606 GN=DERA PE=1 SV=2
High	H0YLU7	Electron transfer flavoprotein subunit alpha, mitochondrial (Fragment) OS=Homo sapiens OX=9606 GN=ETFA PE=1 SV=1
High	Q9H9B4	Sideroflexin-1 OS=Homo sapiens OX=9606 GN=SFXN1 PE=1 SV=4
High	P42677	40S ribosomal protein S27 OS=Homo sapiens OX=9606 GN=RPS27 PE=1 SV=3
High	Q71UI9	Histone H2A.V OS=Homo sapiens OX=9606 GN=H2AZ2 PE=1 SV=3
High	C9JLW8	Mapk-regulated corepressor-interacting protein 1 OS=Homo sapiens OX=9606 GN=MCRIP1 PE=1 SV=1
High	P63173	60S ribosomal protein L38 OS=Homo sapiens OX=9606 GN=RPL38 PE=1 SV=2
High	Q01650	Large neutral amino acids transporter small subunit 1 OS=Homo sapiens OX=9606 GN=SLC7A5 PE=1 SV=2
High	P62269	40S ribosomal protein S18 OS=Homo sapiens OX=9606 GN=RPS18 PE=1 SV=3
High	Q6SES1	Major prion protein OS=Homo sapiens OX=9606 GN=PRNP PE=3 SV=1
High	A0A4P8J9P8	IgK_IGKV1-39 (Fragment) OS=Homo sapiens OX=9606 PE=2 SV=1
High	Q2M2I5	Keratin, type I cytoskeletal 24 OS=Homo sapiens OX=9606 GN=KRT24 PE=1 SV=1
High	Q14315	Filamin-C OS=Homo sapiens OX=9606 GN=FLNC PE=1 SV=3
High	P27348	14-3-3 protein theta OS=Homo sapiens OX=9606 GN=YWHAQ PE=1 SV=1
High	E7EMC7	Sequestosome-1 OS=Homo sapiens OX=9606 GN=SQSTM1 PE=1 SV=1
High	A0A3S6H812	Protein arginine N-methyltransferase 1 transcript variant 22 OS=Homo sapiens OX=9606 GN=PRMT1 PE=2 SV=1
High	B4DJB4	Isocitrate dehydrogenase [NAD] subunit, mitochondrial OS=Homo sapiens OX=9606 PE=2 SV=1
High	Q9H444	Charged multivesicular body protein 4b OS=Homo sapiens OX=9606 GN=CHMP4B PE=1 SV=1
High	Q9GZP4	PITH domain-containing protein 1 OS=Homo sapiens OX=9606 GN=PITHD1 PE=1 SV=1
High	P49756	RNA-binding protein 25 OS=Homo sapiens OX=9606 GN=RBM25 PE=1 SV=3
High	F8VYN9	ADP-ribosylation factor-like protein 1 OS=Homo sapiens OX=9606 GN=ARL1 PE=1 SV=1
High	C9JLU1	DNA-directed RNA polymerases I, II, and III subunit RPABC3 (Fragment) OS=Homo sapiens OX=9606 GN=POLR2H PE=1 SV=8
High	A0A024R608	Ribosomal protein, large, P1, isoform CRA_a OS=Homo sapiens OX=9606 GN=RPLP1 PE=3 SV=1
High	E4W6B6	60S ribosomal protein L27 (Fragment) OS=Homo sapiens OX=9606 GN=RPL27 PE=2 SV=1
High	A0A140VK44	Proteasome subunit alpha type OS=Homo sapiens OX=9606 PE=2 SV=1
High	B7ZMD7	Alpha-amylase OS=Homo sapiens OX=9606 GN=AMY1A PE=2 SV=1
High	P25787	Proteasome subunit alpha type-2 OS=Homo sapiens OX=9606 GN=PSMA2 PE=1 SV=2
High	Q96EE3	Nucleoporin SEH1 OS=Homo sapiens OX=9606 GN=SEH1L PE=1 SV=3
High	P62070	Ras-related protein R-Ras2 OS=Homo sapiens OX=9606 GN=RRAS2 PE=1 SV=1
High	Q8NFH4	Nucleoporin Nup37 OS=Homo sapiens OX=9606 GN=NUP37 PE=1 SV=1
High	B7Z591	Calcium load-activated calcium channel OS=Homo sapiens OX=9606 GN=TMCO1 PE=2 SV=1
High	P07741	Adenine phosphoribosyltransferase OS=Homo sapiens OX=9606 GN=APRT PE=1 SV=2
High	A0A5C2FXJ0	IGL c325_light_IGKV2-24_IGKJ4 (Fragment) OS=Homo sapiens OX=9606 PE=2 SV=1
High	Q6ICN0	GRB2 protein (Fragment) OS=Homo sapiens OX=9606 GN=GRB2 PE=2 SV=1
High	Q2L6I2	ABC50 protein OS=Homo sapiens OX=9606 GN=ABCF1 PE=4 SV=1
High	J3KQN4	60S ribosomal protein L36a OS=Homo sapiens OX=9606 GN=RPL36A PE=1 SV=1
High	Q9Y6N1	Cytochrome c oxidase assembly protein COX11, mitochondrial OS=Homo sapiens OX=9606 GN=COX11 PE=1 SV=3
High	H0YKD8	60S ribosomal protein L28 OS=Homo sapiens OX=9606 GN=RPL28 PE=1 SV=1
High	A0A384NL22	Proteasome subunit beta OS=Homo sapiens OX=9606 GN=PSMB3 PE=2 SV=1
High	B4E318	BRCA2 and CDKN1A-interacting protein OS=Homo sapiens OX=9606 PE=2 SV=1
High	Q6FG43	Flotillin OS=Homo sapiens OX=9606 GN=FLOT2 PE=2 SV=1
High	Q6NZY4	Zinc finger CCHC domain-containing protein 8 OS=Homo sapiens OX=9606 GN=ZCCHC8 PE=1 SV=2
High	E9PP00	Probable ribonuclease ZC3H12C OS=Homo sapiens OX=9606 GN=ZC3H12C PE=1 SV=1
High	A0A384MR27	Galectin OS=Homo sapiens OX=9606 PE=2 SV=1
High	B4DHC4	cDNA FLJ51843, highly similar to 14-3-3 protein gamma OS=Homo sapiens OX=9606 PE=2 SV=1
High	Q8TBT6	Uncharacterized protein (Fragment) OS=Homo sapiens OX=9606 PE=2 SV=1
High	C9JEL3	Eukaryotic translation initiation factor 4E type 2 (Fragment) OS=Homo sapiens OX=9606 GN=EIF4E2 PE=1 SV=1
High	A0A087WVM4	Formyltetrahydrofolate synthetase OS=Homo sapiens OX=9606 GN=MTHFD1L PE=1 SV=1
High	V9GZ50	A kinase (PRKA) anchor protein 8-like, isoform CRA_c OS=Homo sapiens OX=9606 GN=AKAP8L PE=1 SV=1
High	A0A2R8YH03	Protein TASOR 2 OS=Homo sapiens OX=9606 GN=TASOR2 PE=1 SV=1
High	Q05DL3	CSNK1A1 protein (Fragment) OS=Homo sapiens OX=9606 GN=CSNK1A1 PE=2 SV=1
High	P30837	Aldehyde dehydrogenase X, mitochondrial OS=Homo sapiens OX=9606 GN=ALDH1B1 PE=1 SV=3
High	Q9NR31	GTP-binding protein SAR1a OS=Homo sapiens OX=9606 GN=SAR1A PE=1 SV=1
High	A0A7G6J4N4	Ubiquitin carboxyl-terminal hydrolase OS=Homo sapiens OX=9606 PE=2 SV=1
High	A0A0A0MT64	NADPH:adrenodoxin oxidoreductase, mitochondrial OS=Homo sapiens OX=9606 GN=FDXR PE=1 SV=1
High	B4DRA0	cDNA FLJ58459, highly similar to RNA-binding region-containing protein 2 OS=Homo sapiens OX=9606 PE=2 SV=1
High	A0A5C2GEZ9	IGH + IGL c587_heavy_IGHV1-69_IGHD3-9_IGHJ3 (Fragment) OS=Homo sapiens OX=9606 PE=2 SV=1
High	Q9BTE6	Alanyl-tRNA editing protein Aarsd1 OS=Homo sapiens OX=9606 GN=AARSD1 PE=1 SV=2
High	B2RD19	Protein-ribulosamine 3-kinase OS=Homo sapiens OX=9606 PE=2 SV=1
High	P31947	14-3-3 protein sigma OS=Homo sapiens OX=9606 GN=SFN PE=1 SV=1
High	A0A5C2FTW2	IGL c152_light_IGKV1D-13_IGKJ5 (Fragment) OS=Homo sapiens OX=9606 PE=2 SV=1
High	P78527	DNA-dependent protein kinase catalytic subunit OS=Homo sapiens OX=9606 GN=PRKDC PE=1 SV=3
High	H0YL69	Proteasome subunit alpha type (Fragment) OS=Homo sapiens OX=9606 GN=PSMA4 PE=1 SV=1
High	Q14011	Cold-inducible RNA-binding protein OS=Homo sapiens OX=9606 GN=CIRBP PE=1 SV=1
High	Q6LEU8	SPINT2 protein (Fragment) OS=Homo sapiens OX=9606 GN=SPINT2 PE=2 SV=1
High	Q5CZ94	Uncharacterized protein DKFZp781M0386 OS=Homo sapiens OX=9606 GN=DKFZp781M0386 PE=2 SV=1
High	B2R5M9	Procollagen-lysine 5-dioxygenase OS=Homo sapiens OX=9606 PE=2 SV=1
High	A4D1M3	Carboxypeptidase A4 OS=Homo sapiens OX=9606 GN=CPA4 PE=2 SV=1
High	A0A7S5BYM1	IGH c731_heavy_IGHV1-69_IGHD1-26_IGHJ4 (Fragment) OS=Homo sapiens OX=9606 PE=2 SV=1
High	A0A5C2GJ36	IG c844_light_IGKV2D-29_IGKJ4 (Fragment) OS=Homo sapiens OX=9606 PE=2 SV=1
High	Q32Q75	Eukaryotic translation initiation factor 4E OS=Homo sapiens OX=9606 GN=EIF4E PE=2 SV=1
High	Q6NZ61	Ras homolog enriched in brain OS=Homo sapiens OX=9606 GN=RHEB PE=2 SV=1
High	Q4G0J3	La-related protein 7 OS=Homo sapiens OX=9606 GN=LARP7 PE=1 SV=1
High	A0A024R8A7	HCG31253, isoform CRA_a OS=Homo sapiens OX=9606 GN=hCG_31253 PE=4 SV=1
High	M0R210	40S ribosomal protein S16 OS=Homo sapiens OX=9606 GN=RPS16 PE=1 SV=1
High	Q59EQ2	Tyrosine 3-monooxygenase/tryptophan 5-monooxygenase activation protein, beta polypeptide variant (Fragment) OS=Homo sapiens OX=9606 PE=2 SV=1
High	Q7L2H7	Eukaryotic translation initiation factor 3 subunit M OS=Homo sapiens OX=9606 GN=EIF3M PE=1 SV=1
High	Q6GQQ9	OTU domain-containing protein 7B OS=Homo sapiens OX=9606 GN=OTUD7B PE=1 SV=1
High	A0A024R326	60S ribosomal protein L29 OS=Homo sapiens OX=9606 GN=RPL29 PE=1 SV=1
High	B4DEB0	cDNA FLJ56054, highly similar to 26S proteasome non-ATPase regulatory subunit 3 OS=Homo sapiens OX=9606 PE=2 SV=1
High	Q68CN4	Uncharacterized protein OS=Homo sapiens OX=9606 GN=DKFZp686E23209 PE=1 SV=2
High	E5RIA4	Aspartyl aminopeptidase OS=Homo sapiens OX=9606 GN=DNPEP PE=1 SV=1
High	A8K6T3	cDNA FLJ78674, highly similar to Homo sapiens desmocollin type 4 OS=Homo sapiens OX=9606 PE=2 SV=1
High	A8K3C5	cDNA FLJ77715, highly similar to Homo sapiens cisplatin resistance-associated overexpressed protein(LUC7A), mRNA OS=Homo sapiens OX=9606 PE=2 SV=1
High	Q9UM13	Anaphase-promoting complex subunit 10 OS=Homo sapiens OX=9606 GN=ANAPC10 PE=1 SV=1
High	B7ZAC7	cDNA, FLJ79141, highly similar to Nucleosome assembly protein 1-like 4 OS=Homo sapiens OX=9606 PE=2 SV=1
High	Q9P270	SLAIN motif-containing protein 2 OS=Homo sapiens OX=9606 GN=SLAIN2 PE=1 SV=2
High	H0YDT6	Eukaryotic translation initiation factor 3 subunit F OS=Homo sapiens OX=9606 GN=EIF3F PE=1 SV=2
High	A0A0X9UWJ6	MS-B1 light chain variable region (Fragment) OS=Homo sapiens OX=9606 PE=2 SV=1
High	A0A140VK70	26S proteasome AAA-ATPase subunit RPT1 OS=Homo sapiens OX=9606 PE=2 SV=1
High	Q53H37	Calmodulin-like skin protein variant (Fragment) OS=Homo sapiens OX=9606 PE=2 SV=1
High	P36551	Oxygen-dependent coproporphyrinogen-III oxidase, mitochondrial OS=Homo sapiens OX=9606 GN=CPOX PE=1 SV=3
High	A0A384N6H6	Septin OS=Homo sapiens OX=9606 PE=2 SV=1
High	A0A5C2G2N0	IGL c2850_light_IGLV2-11_IGLJ1 (Fragment) OS=Homo sapiens OX=9606 PE=2 SV=1
High	Q9Y509	VH3 protein (Fragment) OS=Homo sapiens OX=9606 GN=VH3 PE=2 SV=1
High	P50991	T-complex protein 1 subunit delta OS=Homo sapiens OX=9606 GN=CCT4 PE=1 SV=4
High	Q7L2J0	7SK snRNA methylphosphate capping enzyme OS=Homo sapiens OX=9606 GN=MEPCE PE=1 SV=1
High	G9K389	YWHAE/FAM22B fusion protein (Fragment) OS=Homo sapiens OX=9606 GN=YWHAE/FAM22B fusion PE=2 SV=1
High	Q96QA5	Gasdermin-A OS=Homo sapiens OX=9606 GN=GSDMA PE=1 SV=4
High	P15531	Nucleoside diphosphate kinase A OS=Homo sapiens OX=9606 GN=NME1 PE=1 SV=1
High	B4DNR3	cDNA FLJ52710, highly similar to Abhydrolase domain-containing protein 14B OS=Homo sapiens OX=9606 PE=2 SV=1
High	B2R960	cDNA, FLJ94230, highly similar to Homo sapiens thioredoxin-like 1 (TXNL1), mRNA OS=Homo sapiens OX=9606 PE=2 SV=1
High	Q9Y3D8	Adenylate kinase isoenzyme 6 OS=Homo sapiens OX=9606 GN=AK6 PE=1 SV=1
High	Q2L6I0	MHC class I region proline-rich protein CAT53 OS=Homo sapiens OX=9606 GN=PPP1R10 PE=2 SV=1
High	Q13867	Bleomycin hydrolase OS=Homo sapiens OX=9606 GN=BLMH PE=1 SV=1
High	Q9Y6A4	Cilia- and flagella-associated protein 20 OS=Homo sapiens OX=9606 GN=CFAP20 PE=1 SV=1
High	A0A5C2G7Y8	IGL c3857_light_IGKV1D-13_IGKJ2 (Fragment) OS=Homo sapiens OX=9606 PE=2 SV=1
High	A8K513	U4/U6.U5 small nuclear ribonucleoprotein 27 kDa protein OS=Homo sapiens OX=9606 GN=hCG_1994066 PE=2 SV=1
High	H7BXY3	RNA helicase OS=Homo sapiens OX=9606 GN=DHX30 PE=1 SV=1
High	A0A024R7M8	Uncharacterized protein OS=Homo sapiens OX=9606 GN=LOC115098 PE=3 SV=1
High	F8W651	Coatomer subunit zeta OS=Homo sapiens OX=9606 GN=COPZ1 PE=1 SV=1
High	A0A5C2G781	IGL c3567_light_IGKV1-39_IGKJ2 (Fragment) OS=Homo sapiens OX=9606 PE=2 SV=1
High	Q9NTK5	Obg-like ATPase 1 OS=Homo sapiens OX=9606 GN=OLA1 PE=1 SV=2
High	P07737	Profilin-1 OS=Homo sapiens OX=9606 GN=PFN1 PE=1 SV=2
High	Q05DH1	Proteasome subunit alpha type (Fragment) OS=Homo sapiens OX=9606 GN=PSMA7 PE=2 SV=1
High	A0A090N8Y2	Protein disulfide-isomerase A4 OS=Homo sapiens OX=9606 GN=ERP70 PE=2 SV=1
High	P31689	DnaJ homolog subfamily A member 1 OS=Homo sapiens OX=9606 GN=DNAJA1 PE=1 SV=2
High	B4DLN1	cDNA FLJ60124, highly similar to Mitochondrial dicarboxylate carrier OS=Homo sapiens OX=9606 PE=2 SV=1
High	M0R257	Ras-related protein Rab-3A (Fragment) OS=Homo sapiens OX=9606 GN=RAB3A PE=1 SV=1
High	B3KMV5	cDNA FLJ12728 fis, clone NT2RP2000040, highly similar to Protein FAM62A OS=Homo sapiens OX=9606 PE=2 SV=1
High	A0A5C2GXM4	IG c450_light_IGLV1-44_IGLJ3 (Fragment) OS=Homo sapiens OX=9606 PE=2 SV=1
High	A8K9C6	cDNA FLJ76687, highly similar to Homo sapiens nuclear factor of activated T-cells, cytoplasmic, calcineurin-dependent 1 (NFATC1), transcript variant 1, mRNA OS=Homo sapiens OX=9606 PE=2 SV=1
High	A0A5C2GYY3	IG c1589_light_IGKV2-24_IGKJ1 (Fragment) OS=Homo sapiens OX=9606 PE=2 SV=1
High	P56192	Methionine--tRNA ligase, cytoplasmic OS=Homo sapiens OX=9606 GN=MARS1 PE=1 SV=2
High	A0A024R321	Filamin B, beta (Actin binding protein 278), isoform CRA_a OS=Homo sapiens OX=9606 GN=FLNB PE=3 SV=1
High	B8ZZL8	10 kDa heat shock protein, mitochondrial OS=Homo sapiens OX=9606 GN=HSPE1 PE=1 SV=1
High	F6IR49	MHC class I antigen (Fragment) OS=Homo sapiens OX=9606 GN=HLA-A PE=3 SV=1
High	P60866	40S ribosomal protein S20 OS=Homo sapiens OX=9606 GN=RPS20 PE=1 SV=1
High	A0A060VHI5	MHC class I antigen OS=Homo sapiens OX=9606 GN=HLA-C PE=3 SV=1
High	A0A5C2GJP7	IG c399_light_IGKV2D-29_IGKJ3 (Fragment) OS=Homo sapiens OX=9606 PE=2 SV=1
High	E9PHV5	Protein ITPRID2 OS=Homo sapiens OX=9606 GN=ITPRID2 PE=1 SV=1
High	B7Z809	C-1-tetrahydrofolate synthase, cytoplasmic OS=Homo sapiens OX=9606 PE=2 SV=1
High	A8K4M5	Cyclin-T1 OS=Homo sapiens OX=9606 PE=2 SV=1
High	A0A024RD83	Tetratricopeptide repeat domain 19, isoform CRA_a OS=Homo sapiens OX=9606 GN=TTC19 PE=3 SV=1
High	A0A5C2GGC3	IGH + IGL c439_light_IGKV4-1_IGKJ2 (Fragment) OS=Homo sapiens OX=9606 PE=2 SV=1
High	Q4W4Y1	Dopamine receptor interacting protein 4 OS=Homo sapiens OX=9606 GN=DRIP4 PE=2 SV=1
High	Q68DK7	Male-specific lethal 1 homolog OS=Homo sapiens OX=9606 GN=MSL1 PE=1 SV=3
High	S6BAR0	IgG L chain OS=Homo sapiens OX=9606 PE=2 SV=1
High	A0A5C2FT34	IGL c88_light_IGKV2D-29_IGKJ2 (Fragment) OS=Homo sapiens OX=9606 PE=2 SV=1
High	A0A024R0H2	Mitochondrial ribosomal protein S12, isoform CRA_a OS=Homo sapiens OX=9606 GN=MRPS12 PE=3 SV=1
High	Q16555	Dihydropyrimidinase-related protein 2 OS=Homo sapiens OX=9606 GN=DPYSL2 PE=1 SV=1
High	A1KXE4	Myelin-associated neurite-outgrowth inhibitor OS=Homo sapiens OX=9606 GN=FAM168B PE=1 SV=1
High	Q08945	FACT complex subunit SSRP1 OS=Homo sapiens OX=9606 GN=SSRP1 PE=1 SV=1
High	Q9NPJ3	Acyl-coenzyme A thioesterase 13 OS=Homo sapiens OX=9606 GN=ACOT13 PE=1 SV=1
High	A0A5C2G6S6	IGL c2133_light_IGKV2-30_IGKJ3 (Fragment) OS=Homo sapiens OX=9606 PE=2 SV=1
High	Q7L5D6	Golgi to ER traffic protein 4 homolog OS=Homo sapiens OX=9606 GN=GET4 PE=1 SV=1
High	A0A5C2G1P1	IGL c1387_light_IGKV4-1_IGKJ4 (Fragment) OS=Homo sapiens OX=9606 PE=2 SV=1
High	Q9BYD6	39S ribosomal protein L1, mitochondrial OS=Homo sapiens OX=9606 GN=MRPL1 PE=1 SV=2
High	A0A5C2GE70	IG c780_heavy_IGHV1-18_IGHD4-23_IGHJ4 (Fragment) OS=Homo sapiens OX=9606 PE=2 SV=1
High	A0A5C2FWS8	IGL c365_light_IGKV1D-39_IGKJ2 (Fragment) OS=Homo sapiens OX=9606 PE=2 SV=1
High	A0A024RCR6	BCL2-associated athanogene 6 OS=Homo sapiens OX=9606 GN=BAG6 PE=1 SV=1
High	A0A5C2G2Y5	IGL c3638_light_IGKV4-1_IGKJ5 (Fragment) OS=Homo sapiens OX=9606 PE=2 SV=1
High	P19623	Spermidine synthase OS=Homo sapiens OX=9606 GN=SRM PE=1 SV=1
High	P24390	ER lumen protein-retaining receptor 1 OS=Homo sapiens OX=9606 GN=KDELR1 PE=1 SV=1
High	A0A024R5H0	Barrier to autointegration factor 1, isoform CRA_a OS=Homo sapiens OX=9606 GN=BANF1 PE=4 SV=1
High	Q14966	Zinc finger protein 638 OS=Homo sapiens OX=9606 GN=ZNF638 PE=1 SV=2
High	O00743	Serine/threonine-protein phosphatase 6 catalytic subunit OS=Homo sapiens OX=9606 GN=PPP6C PE=1 SV=1
High	P63096	Guanine nucleotide-binding protein G(i) subunit alpha-1 OS=Homo sapiens OX=9606 GN=GNAI1 PE=1 SV=2
High	B0YIW5	Coatomer subunit delta OS=Homo sapiens OX=9606 GN=ARCN1 PE=2 SV=1
High	Q7RTV0	PHD finger-like domain-containing protein 5A OS=Homo sapiens OX=9606 GN=PHF5A PE=1 SV=1
High	Q6FHU2	Phosphoglycerate mutase (Fragment) OS=Homo sapiens OX=9606 GN=PGAM1 PE=2 SV=1
High	A0A5C2G2X2	IGL c693_light_IGKV3-20_IGKJ2 (Fragment) OS=Homo sapiens OX=9606 PE=2 SV=1
High	B3KPA6	Acyl-Coenzyme A dehydrogenase, very long chain, isoform CRA_e OS=Homo sapiens OX=9606 GN=ACADVL PE=2 SV=1
High	A0A5C2G6Z4	IGL c107_light_IGKV1D-39_IGKJ1 (Fragment) OS=Homo sapiens OX=9606 PE=2 SV=1
High	A0A5C2G5L7	IGL c3870_light_IGKV1-33_IGKJ3 (Fragment) OS=Homo sapiens OX=9606 PE=2 SV=1
High	Q5TEC6	Histone HIST2H3PS2 OS=Homo sapiens OX=9606 GN=H3-2 PE=1 SV=1
High	A0A024R136	Rac GTPase activating protein 1, isoform CRA_a OS=Homo sapiens OX=9606 GN=RACGAP1 PE=4 SV=1
High	B4DP61	Survival motor neuron protein OS=Homo sapiens OX=9606 GN=SMN1 PE=1 SV=1
High	A0A024R0L6	Epididymis secretory sperm binding protein OS=Homo sapiens OX=9606 GN=PAFAH1B3 PE=2 SV=1
High	Q9NYZ3	G2 and S phase-expressed protein 1 OS=Homo sapiens OX=9606 GN=GTSE1 PE=1 SV=3
High	A0A5C2GCB8	IGH + IGL c388_heavy_IGHV3-74_IGHD2-2_IGHJ3 (Fragment) OS=Homo sapiens OX=9606 PE=2 SV=1
High	A0A140VJZ1	Ubiquitin carboxyl-terminal hydrolase OS=Homo sapiens OX=9606 PE=2 SV=1
High	Q9H5V9	STING ER exit protein OS=Homo sapiens OX=9606 GN=STEEP1 PE=1 SV=1
High	Q8WUQ7	Cactin OS=Homo sapiens OX=9606 GN=CACTIN PE=1 SV=3
High	B4DLT1	cDNA FLJ59716, highly similar to Vacuolar protein sorting 26A OS=Homo sapiens OX=9606 PE=2 SV=1
High	A0A5C2GV13	IG c1301_light_IGKV4-1_IGKJ2 (Fragment) OS=Homo sapiens OX=9606 PE=2 SV=1
High	A0A5C2G229	IGL c2506_light_IGKV1-33_IGKJ4 (Fragment) OS=Homo sapiens OX=9606 PE=2 SV=1
High	B3KPZ7	cDNA FLJ32517 fis, clone SMINT1000117, highly similar to Pyruvate dehydrogenase (lipoamide)-phosphatase 1 OS=Homo sapiens OX=9606 PE=2 SV=1
High	A0A5C2GI34	IG c798_light_IGKV1-5_IGKJ2 (Fragment) OS=Homo sapiens OX=9606 PE=2 SV=1
High	B4DVN1	cDNA FLJ52214, highly similar to DnaJ homolog subfamily B member 6 OS=Homo sapiens OX=9606 PE=2 SV=1
High	A0A5C2GJ51	IG c360_light_IGKV3-20_IGKJ2 (Fragment) OS=Homo sapiens OX=9606 PE=2 SV=1
High	A0A5C2GHE3	IG c593_light_IGKV1D-13_IGKJ2 (Fragment) OS=Homo sapiens OX=9606 PE=2 SV=1
High	P53618	Coatomer subunit beta OS=Homo sapiens OX=9606 GN=COPB1 PE=1 SV=3
High	A0A024R9E6	Transcription initiation factor TFIID 150 kDa subunit OS=Homo sapiens OX=9606 GN=TAF2 PE=3 SV=1
High	Q5JQ44	Ras-related protein Rap-2 (Fragment) OS=Homo sapiens OX=9606 GN=DKFZp547A0616 PE=2 SV=1
High	A0A494C0L6	Thymidine phosphorylase (Fragment) OS=Homo sapiens OX=9606 GN=TYMP PE=1 SV=1
High	P36405	ADP-ribosylation factor-like protein 3 OS=Homo sapiens OX=9606 GN=ARL3 PE=1 SV=2
High	D3DT44	GCS light chain OS=Homo sapiens OX=9606 GN=GCLM PE=3 SV=1
High	A0A024R1T1	40S ribosomal protein S19-binding protein 1 OS=Homo sapiens OX=9606 GN=RPS19BP1 PE=3 SV=1
High	B2R5H0	Protein S100 OS=Homo sapiens OX=9606 PE=2 SV=1
High	F5GXX5	Dolichyl-diphosphooligosaccharide--protein glycosyltransferase subunit DAD1 OS=Homo sapiens OX=9606 GN=DAD1 PE=1 SV=1
High	A0A5C2G071	IGL c2621_light_IGKV3-15_IGKJ1 (Fragment) OS=Homo sapiens OX=9606 PE=2 SV=1
High	Q96CS3	FAS-associated factor 2 OS=Homo sapiens OX=9606 GN=FAF2 PE=1 SV=2
High	A0A5C2FUQ0	IGL c748_light_IGKV4-1_IGKJ1 (Fragment) OS=Homo sapiens OX=9606 PE=2 SV=1
High	A0A5C2G7B7	IGL c3585_light_IGKV4-1_IGKJ3 (Fragment) OS=Homo sapiens OX=9606 PE=2 SV=1
High	C9JYQ9	60S ribosomal protein L22-like 1 OS=Homo sapiens OX=9606 GN=RPL22L1 PE=1 SV=1
High	Q99590	Protein SCAF11 OS=Homo sapiens OX=9606 GN=SCAF11 PE=1 SV=2
High	A0A7P0TBJ7	Cytoplasmic dynein 1 heavy chain 1 OS=Homo sapiens OX=9606 GN=DYNC1H1 PE=4 SV=1
High	B2RBH2	Ecto-5'-nucleotidase OS=Homo sapiens OX=9606 PE=2 SV=1
High	Q9NR30	Nucleolar RNA helicase 2 OS=Homo sapiens OX=9606 GN=DDX21 PE=1 SV=5
High	F8W8D3	Histone RNA hairpin-binding protein OS=Homo sapiens OX=9606 GN=SLBP PE=1 SV=1
High	A0A2R8Y695	IQ motif and SEC7 domain-containing protein 1 (Fragment) OS=Homo sapiens OX=9606 GN=IQSEC1 PE=1 SV=1
High	Q9UKK3	Protein mono-ADP-ribosyltransferase PARP4 OS=Homo sapiens OX=9606 GN=PARP4 PE=1 SV=3
High	A0A5C2G1L7	IGL c1835_light_IGKV1-5_IGKJ1 (Fragment) OS=Homo sapiens OX=9606 PE=2 SV=1
High	A0A024R6X2	Core-binding factor, beta subunit, isoform CRA_b OS=Homo sapiens OX=9606 GN=CBFB PE=4 SV=1
High	A0A5C2G134	IGL c2842_light_IGKV1D-13_IGKJ4 (Fragment) OS=Homo sapiens OX=9606 PE=2 SV=1
High	Q15046	Lysine--tRNA ligase OS=Homo sapiens OX=9606 GN=KARS1 PE=1 SV=3
High	Q8WUK0	Phosphatidylglycerophosphatase and protein-tyrosine phosphatase 1 OS=Homo sapiens OX=9606 GN=PTPMT1 PE=1 SV=1
High	Q9BQ70	Transcription factor 25 OS=Homo sapiens OX=9606 GN=TCF25 PE=1 SV=1
High	A0A023T6R1	Mago nashi protein OS=Homo sapiens OX=9606 GN=FLJ10292 PE=2 SV=1
High	Q5T6U8	High mobility group AT-hook 1 OS=Homo sapiens OX=9606 GN=HMGA1 PE=2 SV=1
High	A0A5C2GCE0	IGH + IGL c263_light_IGKV1-27_IGKJ3 (Fragment) OS=Homo sapiens OX=9606 PE=2 SV=1
High	I3L397	Eukaryotic translation initiation factor 5A (Fragment) OS=Homo sapiens OX=9606 GN=EIF5A PE=1 SV=8
High	Q6XZF7	Dynamin-binding protein OS=Homo sapiens OX=9606 GN=DNMBP PE=1 SV=1
High	Q8WVV4	Protein POF1B OS=Homo sapiens OX=9606 GN=POF1B PE=1 SV=3
High	Q5QPM7	Proteasome inhibitor PI31 subunit OS=Homo sapiens OX=9606 GN=PSMF1 PE=1 SV=2
High	A0A5C2GKP8	IGH + IGL c617_light_IGKV1-33_IGKJ4 (Fragment) OS=Homo sapiens OX=9606 PE=2 SV=1
High	A0A087X295	WD repeat-containing protein 6 OS=Homo sapiens OX=9606 GN=WDR6 PE=1 SV=1
High	A0A5C2G7I4	IGH c572_heavy__IGHV3-21_IGHD5-18_IGHJ5 (Fragment) OS=Homo sapiens OX=9606 PE=2 SV=1
High	Q53GA4	Pleckstrin homology-like domain family A member 2 OS=Homo sapiens OX=9606 GN=PHLDA2 PE=1 SV=2
High	P62316	Small nuclear ribonucleoprotein Sm D2 OS=Homo sapiens OX=9606 GN=SNRPD2 PE=1 SV=1
High	Q4ZG77	26S proteasome regulatory subunit RPN11 (Fragment) OS=Homo sapiens OX=9606 GN=PSMD14 PE=4 SV=1
High	P36957	Dihydrolipoyllysine-residue succinyltransferase component of 2-oxoglutarate dehydrogenase complex, mitochondrial OS=Homo sapiens OX=9606 GN=DLST PE=1 SV=4
High	P59665	Neutrophil defensin 1 OS=Homo sapiens OX=9606 GN=DEFA1 PE=1 SV=1
High	Q6FGV9	Phosphomevalonate kinase (Fragment) OS=Homo sapiens OX=9606 GN=PMVK PE=2 SV=1
High	A0A5C2GXM0	IG c388_light_IGKV4-1_IGKJ3 (Fragment) OS=Homo sapiens OX=9606 PE=2 SV=1
High	Q96P70	Importin-9 OS=Homo sapiens OX=9606 GN=IPO9 PE=1 SV=3
High	F8VPA7	Elongation factor Ts, mitochondrial OS=Homo sapiens OX=9606 GN=TSFM PE=1 SV=1
High	P20618	Proteasome subunit beta type-1 OS=Homo sapiens OX=9606 GN=PSMB1 PE=1 SV=2
High	B4DZJ6	cDNA FLJ54706, highly similar to Ubiquitin-associated protein 2-like OS=Homo sapiens OX=9606 PE=2 SV=1
High	P69905	Hemoglobin subunit alpha OS=Homo sapiens OX=9606 GN=HBA1 PE=1 SV=2
High	A0A5C2G8K4	IGH + IGL c39_light_IGKV2-24_IGKJ4 (Fragment) OS=Homo sapiens OX=9606 PE=2 SV=1
High	P62277	40S ribosomal protein S13 OS=Homo sapiens OX=9606 GN=RPS13 PE=1 SV=2
High	A4D177	Chromobox homolog 3 (HP1 gamma homolog, Drosophila) OS=Homo sapiens OX=9606 GN=CBX3 PE=4 SV=1
High	A0A5C2G0M0	IGL c1525_light_IGKV4-1_IGKJ2 (Fragment) OS=Homo sapiens OX=9606 PE=2 SV=1
High	A0A384NPW5	Epididymis secretory sperm binding protein OS=Homo sapiens OX=9606 PE=2 SV=1
High	A0A5C2GU43	IG c273_light_IGKV4-1_IGKJ1 (Fragment) OS=Homo sapiens OX=9606 PE=2 SV=1
High	Q9UGM3	Deleted in malignant brain tumors 1 protein OS=Homo sapiens OX=9606 GN=DMBT1 PE=1 SV=2
High	Q15393	Splicing factor 3B subunit 3 OS=Homo sapiens OX=9606 GN=SF3B3 PE=1 SV=4
High	Q93009	Ubiquitin carboxyl-terminal hydrolase 7 OS=Homo sapiens OX=9606 GN=USP7 PE=1 SV=2
High	E9PDF6	Unconventional myosin-Ib OS=Homo sapiens OX=9606 GN=MYO1B PE=1 SV=1
High	Q9H773	dCTP pyrophosphatase 1 OS=Homo sapiens OX=9606 GN=DCTPP1 PE=1 SV=1
High	A0A5C2GP33	IG c988_heavy_IGHV4-34_IGHD1-7_IGHJ5 (Fragment) OS=Homo sapiens OX=9606 PE=2 SV=1
High	A0A7P0TB94	Probable ATP-dependent RNA helicase DDX20 OS=Homo sapiens OX=9606 GN=DDX20 PE=4 SV=1
High	J3KS22	L-xylulose reductase (Fragment) OS=Homo sapiens OX=9606 GN=DCXR PE=1 SV=8
High	P49721	Proteasome subunit beta type-2 OS=Homo sapiens OX=9606 GN=PSMB2 PE=1 SV=1
High	A0A3B3ITX4	Uncharacterized protein OS=Homo sapiens OX=9606 PE=3 SV=1
High	A0A7I2V5Y5	Kinesin-like protein OS=Homo sapiens OX=9606 GN=KIF23 PE=1 SV=1
High	A0A5C2GMF2	IG c998_light_IGKV4-1_IGKJ2 (Fragment) OS=Homo sapiens OX=9606 PE=2 SV=1
High	Q9NY12	H/ACA ribonucleoprotein complex subunit 1 OS=Homo sapiens OX=9606 GN=GAR1 PE=1 SV=1
High	Q9UJZ1	Stomatin-like protein 2, mitochondrial OS=Homo sapiens OX=9606 GN=STOML2 PE=1 SV=1
High	Q99832	T-complex protein 1 subunit eta OS=Homo sapiens OX=9606 GN=CCT7 PE=1 SV=2
High	E9PPH5	Acidic leucine-rich nuclear phosphoprotein 32 family member E (Fragment) OS=Homo sapiens OX=9606 GN=ANP32E PE=1 SV=1
High	B4DLR8	NAD(P)H dehydrogenase [quinone] 1 OS=Homo sapiens OX=9606 GN=NQO1 PE=1 SV=1
High	B3KX51	cDNA FLJ44754 fis, clone BRACE3030748, highly similar to Guanine nucleotide-binding protein G(i), alpha-2 subunit OS=Homo sapiens OX=9606 PE=2 SV=1
High	P53597	Succinate--CoA ligase [ADP/GDP-forming] subunit alpha, mitochondrial OS=Homo sapiens OX=9606 GN=SUCLG1 PE=1 SV=4
High	Q9BRS8	La-related protein 6 OS=Homo sapiens OX=9606 GN=LARP6 PE=1 SV=1
High	Q9BVV7	Mitochondrial import inner membrane translocase subunit Tim21 OS=Homo sapiens OX=9606 GN=TIMM21 PE=1 SV=1
High	Q53ZX8	Protease serine 1 (Fragment) OS=Homo sapiens OX=9606 GN=PRSS1 PE=4 SV=1
High	Q8NBQ5	Estradiol 17-beta-dehydrogenase 11 OS=Homo sapiens OX=9606 GN=HSD17B11 PE=1 SV=3
High	C9JA28	Signal sequence receptor subunit gamma OS=Homo sapiens OX=9606 GN=SSR3 PE=1 SV=1
High	A0A5C2G0N6	IGL c2100_light_IGLV3-21_IGLJ2 (Fragment) OS=Homo sapiens OX=9606 PE=2 SV=1
High	A0A5C2G8C0	IGH + IGL c34_heavy_IGHV3-21_IGHD2-2_IGHJ4 (Fragment) OS=Homo sapiens OX=9606 PE=2 SV=1
High	A0A125QYY8	IBM-B1 light chain variable region (Fragment) OS=Homo sapiens OX=9606 PE=2 SV=1
High	A0A5C2G2D7	IGL c2606_light_IGKV2-30_IGKJ1 (Fragment) OS=Homo sapiens OX=9606 PE=2 SV=1
High	Q86V48	Leucine zipper protein 1 OS=Homo sapiens OX=9606 GN=LUZP1 PE=1 SV=2
High	Q9Y2L1	Exosome complex exonuclease RRP44 OS=Homo sapiens OX=9606 GN=DIS3 PE=1 SV=2
High	B4DHR1	cDNA FLJ53009, highly similar to Calreticulin OS=Homo sapiens OX=9606 PE=2 SV=1
High	A8K6Y1	cDNA FLJ75526, highly similar to Homo sapiens proliferation-associated 2G4, 38kDa (PA2G4), mRNA (Fragment) OS=Homo sapiens OX=9606 PE=2 SV=1
High	K7EPJ1	Ubiquitin-conjugating enzyme E2 S (Fragment) OS=Homo sapiens OX=9606 GN=UBE2S PE=1 SV=1
High	O75629	Protein CREG1 OS=Homo sapiens OX=9606 GN=CREG1 PE=1 SV=1
High	P05387	60S acidic ribosomal protein P2 OS=Homo sapiens OX=9606 GN=RPLP2 PE=1 SV=1
High	E9PMI6	Chloride channel, nucleotide sensitive 1A OS=Homo sapiens OX=9606 GN=CLNS1A PE=1 SV=1
High	Q9HD26	Golgi-associated PDZ and coiled-coil motif-containing protein OS=Homo sapiens OX=9606 GN=GOPC PE=1 SV=1
High	A0A7I2V2U8	Twinfilin-2 OS=Homo sapiens OX=9606 GN=TWF2 PE=1 SV=1
High	P27144	Adenylate kinase 4, mitochondrial OS=Homo sapiens OX=9606 GN=AK4 PE=1 SV=1
High	I0B0K8	Truncated profilaggrin OS=Homo sapiens OX=9606 GN=FLG PE=4 SV=1
High	A0A1U9X8X5	Corneodesmosin OS=Homo sapiens OX=9606 PE=4 SV=1
High	O43615	Mitochondrial import inner membrane translocase subunit TIM44 OS=Homo sapiens OX=9606 GN=TIMM44 PE=1 SV=2
High	Q53EP4	Dolichyl-diphosphooligosaccharide--protein glycosyltransferase subunit 1 (Fragment) OS=Homo sapiens OX=9606 PE=2 SV=1
High	H7C0I5	Cysteine desulfurase (Fragment) OS=Homo sapiens OX=9606 PE=4 SV=1
High	X6R242	Polypyrimidine tract-binding protein 3 (Fragment) OS=Homo sapiens OX=9606 GN=PTBP3 PE=1 SV=7
High	A0A024QZ42	HCG1985580, isoform CRA_c OS=Homo sapiens OX=9606 GN=PDCD6 PE=1 SV=1
High	O76071	Probable cytosolic iron-sulfur protein assembly protein CIAO1 OS=Homo sapiens OX=9606 GN=CIAO1 PE=1 SV=1
High	L7YL59	ATP synthase subunit a OS=Homo sapiens OX=9606 GN=ATP6 PE=3 SV=1
High	Q9NR12	PDZ and LIM domain protein 7 OS=Homo sapiens OX=9606 GN=PDLIM7 PE=1 SV=1
High	A0A087X2I1	26S proteasome regulatory subunit 10B OS=Homo sapiens OX=9606 GN=PSMC6 PE=1 SV=1
High	A6PVX3	26S proteasome non-ATPase regulatory subunit 4 (Fragment) OS=Homo sapiens OX=9606 GN=PSMD4 PE=1 SV=1
High	Q59FC9	Enigma homolog (Fragment) OS=Homo sapiens OX=9606 PE=2 SV=1
High	V9HWF4	Phosphoglycerate kinase OS=Homo sapiens OX=9606 GN=HEL-S-68p PE=2 SV=1
High	A0A5C2GHD5	IG c713_heavy_IGHV3-66_IGHD3-22_IGHJ3 (Fragment) OS=Homo sapiens OX=9606 PE=2 SV=1
High	A0A7S5BZN5	IGH c849_heavy_IGHV4-4_IGHD4-4_IGHJ5 (Fragment) OS=Homo sapiens OX=9606 PE=2 SV=1
High	B4DU42	cDNA FLJ56153, highly similar to Homo sapiens transforming growth factor beta regulator 4 (TBRG4), transcript variant 1, mRNA OS=Homo sapiens OX=9606 PE=2 SV=1
High	B7Z7P8	Eukaryotic peptide chain release factor subunit 1 OS=Homo sapiens OX=9606 GN=ETF1 PE=1 SV=1
High	A0A5C2FXX6	IGL c1811_light_IGLV1-40_IGLJ3 (Fragment) OS=Homo sapiens OX=9606 PE=2 SV=1
High	P25788	Proteasome subunit alpha type-3 OS=Homo sapiens OX=9606 GN=PSMA3 PE=1 SV=2
High	B4E0C7	Tripeptidyl aminopeptidase OS=Homo sapiens OX=9606 PE=2 SV=1
High	A0A3B3ISX4	RecQ-mediated genome instability protein 2 OS=Homo sapiens OX=9606 GN=RMI2 PE=1 SV=1
High	A0A5C2G171	IGL c2899_light_IGKV1-39_IGKJ1 (Fragment) OS=Homo sapiens OX=9606 PE=2 SV=1
High	A8K5K5	Eukaryotic translation initiation factor 3 subunit G OS=Homo sapiens OX=9606 GN=EIF3G PE=2 SV=1
High	Q5JXB2	Putative ubiquitin-conjugating enzyme E2 N-like OS=Homo sapiens OX=9606 GN=UBE2NL PE=1 SV=1
High	P07996	Thrombospondin-1 OS=Homo sapiens OX=9606 GN=THBS1 PE=1 SV=2
High	Q75MT8	Uncharacterized protein WBSCR1 (Fragment) OS=Homo sapiens OX=9606 GN=WBSCR1 PE=4 SV=1
High	Q15417	Calponin-3 OS=Homo sapiens OX=9606 GN=CNN3 PE=1 SV=1
High	Q8WYQ5	Microprocessor complex subunit DGCR8 OS=Homo sapiens OX=9606 GN=DGCR8 PE=1 SV=1
High	B3KPZ8	cDNA FLJ32530 fis, clone SMINT2000185, highly similar to TRANSKETOLASE OS=Homo sapiens OX=9606 PE=2 SV=1
High	A0A5C2GTI8	IG c784_light_IGKV1D-13_IGKJ4 (Fragment) OS=Homo sapiens OX=9606 PE=2 SV=1
High	V9HWE8	Epididymis secretory sperm binding protein Li 47e OS=Homo sapiens OX=9606 GN=HEL-S-47e PE=2 SV=1
High	Q9Y4E8	Ubiquitin carboxyl-terminal hydrolase 15 OS=Homo sapiens OX=9606 GN=USP15 PE=1 SV=3
High	Q02952	A-kinase anchor protein 12 OS=Homo sapiens OX=9606 GN=AKAP12 PE=1 SV=4
High	A2J1N8	Rheumatoid factor RF-ET11 (Fragment) OS=Homo sapiens OX=9606 PE=2 SV=1
High	C9JUP7	15S Mg(2+)-ATPase p97 subunit OS=Homo sapiens OX=9606 GN=VCP PE=1 SV=2
High	K7EJB0	CCAAT-box-binding transcription factor (Fragment) OS=Homo sapiens OX=9606 GN=NFIX PE=1 SV=1
High	Q99496	E3 ubiquitin-protein ligase RING2 OS=Homo sapiens OX=9606 GN=RNF2 PE=1 SV=1
High	B4E0R6	cDNA FLJ54573, highly similar to Importin beta-3 OS=Homo sapiens OX=9606 PE=2 SV=1
High	A0A024R565	Multifunctional methyltransferase subunit TRM112-like protein OS=Homo sapiens OX=9606 GN=HSPC152 PE=3 SV=1
High	E9PBS1	AIR carboxylase (Fragment) OS=Homo sapiens OX=9606 GN=PAICS PE=1 SV=1
High	P62851	40S ribosomal protein S25 OS=Homo sapiens OX=9606 GN=RPS25 PE=1 SV=1
High	Q59E97	Galectin (Fragment) OS=Homo sapiens OX=9606 PE=2 SV=1
High	A0A5C2FYL5	IGL c1320_light_IGKV1-9_IGKJ4 (Fragment) OS=Homo sapiens OX=9606 PE=2 SV=1
High	A0A0S2Z4Z6	Serine/arginine repetitive matrix 1 isoform 2 (Fragment) OS=Homo sapiens OX=9606 GN=SRRM1 PE=1 SV=1
High	P06703	Protein S100-A6 OS=Homo sapiens OX=9606 GN=S100A6 PE=1 SV=1
High	Q9BYD1	39S ribosomal protein L13, mitochondrial OS=Homo sapiens OX=9606 GN=MRPL13 PE=1 SV=1
High	A0A0G2JR44	Centrosomal protein of 72 kDa (Fragment) OS=Homo sapiens OX=9606 GN=CEP72 PE=1 SV=1
High	A0A7I2V5Z9	Transforming growth factor beta-1 proprotein OS=Homo sapiens OX=9606 GN=TGFB1 PE=1 SV=1
High	A0A5C2FYI2	IGL c1226_light_IGKV1-5_IGKJ1 (Fragment) OS=Homo sapiens OX=9606 PE=2 SV=1
High	Q03113	Guanine nucleotide-binding protein subunit alpha-12 OS=Homo sapiens OX=9606 GN=GNA12 PE=1 SV=4
High	E5RI99	60S ribosomal protein L30 (Fragment) OS=Homo sapiens OX=9606 GN=RPL30 PE=1 SV=1
High	Q9NP72	Ras-related protein Rab-18 OS=Homo sapiens OX=9606 GN=RAB18 PE=1 SV=1
High	A0A5C2FTQ5	IGL c82_light_IGKV4-1_IGKJ2 (Fragment) OS=Homo sapiens OX=9606 PE=2 SV=1
High	Q6P4A8	Phospholipase B-like 1 OS=Homo sapiens OX=9606 GN=PLBD1 PE=1 SV=2
High	A0A5C2GLD4	IG c846_light_IGKV1-5_IGKJ1 (Fragment) OS=Homo sapiens OX=9606 PE=2 SV=1
High	F8WEH2	Transformer-2 protein homolog alpha OS=Homo sapiens OX=9606 GN=TRA2A PE=1 SV=1
High	Q53FX9	Mitochondrial ribosomal protein S11 isoform a variant (Fragment) OS=Homo sapiens OX=9606 PE=2 SV=1
High	Q6IAT9	Proteasome subunit beta OS=Homo sapiens OX=9606 GN=PSMB6 PE=2 SV=1
High	Q9Y4H2	Insulin receptor substrate 2 OS=Homo sapiens OX=9606 GN=IRS2 PE=1 SV=2
High	P62633	Cellular nucleic acid-binding protein OS=Homo sapiens OX=9606 GN=CNBP PE=1 SV=1
High	B7Z3A4	cDNA FLJ56906, highly similar to RNA-binding protein 16 OS=Homo sapiens OX=9606 PE=2 SV=1
High	P35030	Trypsin-3 OS=Homo sapiens OX=9606 GN=PRSS3 PE=1 SV=2
High	A0A5C2G440	IGL c3320_light_IGKV1-5_IGKJ1 (Fragment) OS=Homo sapiens OX=9606 PE=2 SV=1
High	P42766	60S ribosomal protein L35 OS=Homo sapiens OX=9606 GN=RPL35 PE=1 SV=2
High	P62318	Small nuclear ribonucleoprotein Sm D3 OS=Homo sapiens OX=9606 GN=SNRPD3 PE=1 SV=1
High	Q15437	Protein transport protein Sec23B OS=Homo sapiens OX=9606 GN=SEC23B PE=1 SV=2
High	G3V4Q2	Protein transport protein SEC23 OS=Homo sapiens OX=9606 GN=SEC23A PE=1 SV=1
High	Q562T7	Actin-like protein (Fragment) OS=Homo sapiens OX=9606 GN=ACT PE=4 SV=1
High	A0A7S5EUX9	IGH c2806_heavy_IGHV3-33_IGHD2-21_IGHJ4 (Fragment) OS=Homo sapiens OX=9606 PE=2 SV=1
High	V6A6E5	MHC class I antigen OS=Homo sapiens OX=9606 GN=HLA-C PE=3 SV=1
High	Q9BVP2	Guanine nucleotide-binding protein-like 3 OS=Homo sapiens OX=9606 GN=GNL3 PE=1 SV=2
High	P63272	Transcription elongation factor SPT4 OS=Homo sapiens OX=9606 GN=SUPT4H1 PE=1 SV=1
High	P82650	28S ribosomal protein S22, mitochondrial OS=Homo sapiens OX=9606 GN=MRPS22 PE=1 SV=1
High	Q9P0J0	NADH dehydrogenase [ubiquinone] 1 alpha subcomplex subunit 13 OS=Homo sapiens OX=9606 GN=NDUFA13 PE=1 SV=3
High	F8VUA2	Charged multivesicular body protein 1a OS=Homo sapiens OX=9606 GN=CHMP1A PE=1 SV=1
High	P0C860	Putative male-specific lethal-3 protein-like 2 OS=Homo sapiens OX=9606 GN=MSL3P1 PE=5 SV=1
High	P55769	NHP2-like protein 1 OS=Homo sapiens OX=9606 GN=SNU13 PE=1 SV=3
High	A0A5C2FWT5	IGL c138_light_IGKV2-30_IGKJ2 (Fragment) OS=Homo sapiens OX=9606 PE=2 SV=1
High	Q8WUM5	Gem (Nuclear organelle) associated protein 4 OS=Homo sapiens OX=9606 GN=GEMIN4 PE=2 SV=1
High	P21741	Midkine OS=Homo sapiens OX=9606 GN=MDK PE=1 SV=1
High	Q5T750	Skin-specific protein 32 OS=Homo sapiens OX=9606 GN=XP32 PE=1 SV=1
High	A0A5C2G3V7	IGL c983_light_IGKV1-9_IGKJ2 (Fragment) OS=Homo sapiens OX=9606 PE=2 SV=1
High	A0A5C2GTK0	IG c885_light_IGKV1-12_IGKJ2 (Fragment) OS=Homo sapiens OX=9606 PE=2 SV=1
High	Q9BXW7	Haloacid dehalogenase-like hydrolase domain-containing 5 OS=Homo sapiens OX=9606 GN=HDHD5 PE=1 SV=1
High	H7BZL4	Glypican-1 (Fragment) OS=Homo sapiens OX=9606 GN=GPC1 PE=1 SV=1
High	P43686	26S proteasome regulatory subunit 6B OS=Homo sapiens OX=9606 GN=PSMC4 PE=1 SV=2
High	B3KQQ3	Procollagen-lysine 5-dioxygenase OS=Homo sapiens OX=9606 PE=2 SV=1
High	P28838	Cytosol aminopeptidase OS=Homo sapiens OX=9606 GN=LAP3 PE=1 SV=3
High	Q5TGY3	AT-hook DNA-binding motif-containing protein 1 OS=Homo sapiens OX=9606 GN=AHDC1 PE=1 SV=1
High	C9J1V9	EEF1E1-BLOC1S5 readthrough (NMD candidate) OS=Homo sapiens OX=9606 GN=EEF1E1-BLOC1S5 PE=4 SV=2
High	Q86V15	Zinc finger protein castor homolog 1 OS=Homo sapiens OX=9606 GN=CASZ1 PE=1 SV=4
High	P56537	Eukaryotic translation initiation factor 6 OS=Homo sapiens OX=9606 GN=EIF6 PE=1 SV=1
High	A0A5C2G494	IGL c3296_light_IGKV1D-13_IGKJ4 (Fragment) OS=Homo sapiens OX=9606 PE=2 SV=1
High	Q59FS7	RNA helicase (Fragment) OS=Homo sapiens OX=9606 PE=2 SV=1
High	Q00577	Transcriptional activator protein Pur-alpha OS=Homo sapiens OX=9606 GN=PURA PE=1 SV=2
High	A0A7S5C1X0	IGH c205_heavy_IGHV1-46_IGHD7-27_IGHJ4 (Fragment) OS=Homo sapiens OX=9606 PE=2 SV=1
High	B2R5U1	Staphylococcal nuclease domain-containing protein OS=Homo sapiens OX=9606 PE=2 SV=1
High	A0A5C2GGK1	IGL c559_light_IGLV1-47_IGLJ1 (Fragment) OS=Homo sapiens OX=9606 PE=2 SV=1
High	Q86W42	THO complex subunit 6 homolog OS=Homo sapiens OX=9606 GN=THOC6 PE=1 SV=1
High	B4DR61	Protein transport protein Sec61 subunit alpha isoform 1 OS=Homo sapiens OX=9606 GN=SEC61A1 PE=1 SV=1
High	A0A0F7G8J1	Plasminogen OS=Homo sapiens OX=9606 GN=PLG PE=2 SV=1
High	A0A087WUD3	Oligosaccharyltransferase complex subunit OS=Homo sapiens OX=9606 GN=OSTC PE=1 SV=1
High	F5H157	Ras-related protein Rab-35 (Fragment) OS=Homo sapiens OX=9606 GN=RAB35 PE=1 SV=1
High	A0A2U3T1M0	MHC class I antigen OS=Homo sapiens OX=9606 GN=HLA-B PE=3 SV=1
High	A0A5C2GCA5	IGL c213_light_IGKV3D-20_IGKJ4 (Fragment) OS=Homo sapiens OX=9606 PE=2 SV=1
High	A0A5C2FXK4	IGL c345_light_IGKV1-27_IGKJ1 (Fragment) OS=Homo sapiens OX=9606 PE=2 SV=1
High	Q96FJ2	Dynein light chain 2, cytoplasmic OS=Homo sapiens OX=9606 GN=DYNLL2 PE=1 SV=1
High	Q6PD74	Alpha- and gamma-adaptin-binding protein p34 OS=Homo sapiens OX=9606 GN=AAGAB PE=1 SV=1
High	A0A024RDH2	Ubiquitin-conjugating enzyme E2D 3 (UBC4/5 homolog, yeast), isoform CRA_a OS=Homo sapiens OX=9606 GN=UBE2D3 PE=3 SV=1
High	F8W038	Chromosome 17 open reading frame 49 OS=Homo sapiens OX=9606 GN=C17orf49 PE=1 SV=1
High	Q7Z6I8	UPF0461 protein C5orf24 OS=Homo sapiens OX=9606 GN=C5orf24 PE=1 SV=1
High	A0A024R1A3	Ubiquitin-activating enzyme E1 OS=Homo sapiens OX=9606 GN=UBE1 PE=2 SV=1
High	J3QQV2	Monocarboxylate transporter 4 OS=Homo sapiens OX=9606 GN=SLC16A3 PE=1 SV=9
High	P41227	N-alpha-acetyltransferase 10 OS=Homo sapiens OX=9606 GN=NAA10 PE=1 SV=1
High	O60832	H/ACA ribonucleoprotein complex subunit DKC1 OS=Homo sapiens OX=9606 GN=DKC1 PE=1 SV=3
High	B3KQT9	Protein disulfide-isomerase OS=Homo sapiens OX=9606 PE=2 SV=1
High	A0A7S5EY03	IGH c3089_heavy_IGHV1-69_IGHD2-15_IGHJ5 (Fragment) OS=Homo sapiens OX=9606 PE=2 SV=1
High	B4DMV0	Brain-specific angiogenesis inhibitor 1-associated protein 2 OS=Homo sapiens OX=9606 PE=2 SV=1
High	P37108	Signal recognition particle 14 kDa protein OS=Homo sapiens OX=9606 GN=SRP14 PE=1 SV=2
High	M0QY80	Persulfide dioxygenase ETHE1, mitochondrial OS=Homo sapiens OX=9606 GN=ETHE1 PE=1 SV=1
High	C9JAW5	HIG1 domain-containing protein OS=Homo sapiens OX=9606 PE=4 SV=1
High	A0A5C2G1K4	IGL c3012_light_IGKV1D-39_IGKJ1 (Fragment) OS=Homo sapiens OX=9606 PE=2 SV=1
High	A0A024R5P4	Uncharacterized protein OS=Homo sapiens OX=9606 GN=LOC51315 PE=4 SV=1
High	A0A7P0T887	UPF0688 protein C1orf174 OS=Homo sapiens OX=9606 GN=C1orf174 PE=4 SV=1
High	C9JVA8	Serpin B8 (Fragment) OS=Homo sapiens OX=9606 GN=SERPINB8 PE=1 SV=1
High	A0A5C2GI75	IG c217_light_IGKV3-15_IGKJ4 (Fragment) OS=Homo sapiens OX=9606 PE=2 SV=1
High	A0A5C2GRU1	IG c224_light_IGKV4-1_IGKJ1 (Fragment) OS=Homo sapiens OX=9606 PE=2 SV=1
High	P62314	Small nuclear ribonucleoprotein Sm D1 OS=Homo sapiens OX=9606 GN=SNRPD1 PE=1 SV=1
High	D3DQ09	GC-rich promoter binding protein 1-like 1, isoform CRA_a OS=Homo sapiens OX=9606 GN=GPBP1L1 PE=3 SV=1
High	A0A5C2G1A5	IGL c1257_light_IGKV1D-13_IGKJ2 (Fragment) OS=Homo sapiens OX=9606 PE=2 SV=1
High	Q5T4U5	Medium-chain specific acyl-CoA dehydrogenase, mitochondrial OS=Homo sapiens OX=9606 GN=ACADM PE=1 SV=1
High	A0A024R7G7	Solute carrier family 35, member E1, isoform CRA_c OS=Homo sapiens OX=9606 GN=SLC35E1 PE=4 SV=1
High	Q6AI12	Ankyrin repeat domain-containing protein 40 OS=Homo sapiens OX=9606 GN=ANKRD40 PE=1 SV=2
High	A0A5C2G1Q1	IGL c2386_light_IGKV1-27_IGKJ5 (Fragment) OS=Homo sapiens OX=9606 PE=2 SV=1
High	A0A5C2GAL1	IGH + IGL c246_light_IGKV1D-39_IGKJ2 (Fragment) OS=Homo sapiens OX=9606 PE=2 SV=1
High	A0A5C2G4L2	IGL c1203_light_IGKV1D-13_IGKJ1 (Fragment) OS=Homo sapiens OX=9606 PE=2 SV=1
High	A0A5C2G1M4	IGL c1367_light_IGKV3-20_IGKJ2 (Fragment) OS=Homo sapiens OX=9606 PE=2 SV=1
High	Q8NDC0	MAPK-interacting and spindle-stabilizing protein-like OS=Homo sapiens OX=9606 GN=MAPK1IP1L PE=1 SV=4
High	A0A5C2FUZ7	IGL c369_light_IGKV1-27_IGKJ2 (Fragment) OS=Homo sapiens OX=9606 PE=2 SV=1
High	J3QRU1	Tyrosine-protein kinase OS=Homo sapiens OX=9606 GN=YES1 PE=1 SV=1
High	Q14192	Four and a half LIM domains protein 2 OS=Homo sapiens OX=9606 GN=FHL2 PE=1 SV=3
High	A0A024R3U8	Uncharacterized protein OS=Homo sapiens OX=9606 GN=FLJ22555 PE=4 SV=1
High	A0A5C2GB72	IGH + IGL c4_light_IGKV3-15_IGKJ4 (Fragment) OS=Homo sapiens OX=9606 PE=2 SV=1
High	A0A087WV42	Salivary acidic proline-rich phosphoprotein 1/2 OS=Homo sapiens OX=9606 GN=PRH1 PE=4 SV=1
High	A0A5C2GFT1	IG c260_heavy_IGHV3-15_IGHD3-9_IGHJ3 (Fragment) OS=Homo sapiens OX=9606 PE=2 SV=1
High	A0A5C2G5T3	IGL c3796_light_IGKV4-1_IGKJ2 (Fragment) OS=Homo sapiens OX=9606 PE=2 SV=1
High	A0A024RB33	E3 ubiquitin-protein ligase NRDP1 OS=Homo sapiens OX=9606 GN=RNF41 PE=4 SV=1
High	P61964	WD repeat-containing protein 5 OS=Homo sapiens OX=9606 GN=WDR5 PE=1 SV=1
High	A0A4W8VX11	Pericentriolar material 1 protein OS=Homo sapiens OX=9606 GN=PCM1 PE=4 SV=1
High	I4AY87	Epididymis secretory sperm binding protein (Fragment) OS=Homo sapiens OX=9606 GN=MIF PE=2 SV=1
High	A0A5C2GAB1	IGH + IGL c25_light_IGLV3-1_IGLJ2 (Fragment) OS=Homo sapiens OX=9606 PE=2 SV=1
High	B4DLJ5	cDNA FLJ55716, highly similar to Desmocollin-2 OS=Homo sapiens OX=9606 PE=2 SV=1
High	Q9BYD5	Cornifelin OS=Homo sapiens OX=9606 GN=CNFN PE=1 SV=2
High	Q59FR8	Galectin (Fragment) OS=Homo sapiens OX=9606 PE=2 SV=1
High	Q13751	Laminin subunit beta-3 OS=Homo sapiens OX=9606 GN=LAMB3 PE=1 SV=1
High	Q9HCD6	Protein TANC2 OS=Homo sapiens OX=9606 GN=TANC2 PE=1 SV=3
High	Q8WW12	PEST proteolytic signal-containing nuclear protein OS=Homo sapiens OX=9606 GN=PCNP PE=1 SV=2
High	Q6UWP8	Suprabasin OS=Homo sapiens OX=9606 GN=SBSN PE=1 SV=2
High	P46109	Crk-like protein OS=Homo sapiens OX=9606 GN=CRKL PE=1 SV=1
High	Q3L8U1	Chromodomain-helicase-DNA-binding protein 9 OS=Homo sapiens OX=9606 GN=CHD9 PE=1 SV=2
High	E5RJR5	S-phase kinase-associated protein 1 OS=Homo sapiens OX=9606 GN=SKP1 PE=1 SV=1
High	Q9NTB2	Uncharacterized protein DKFZp434P232 (Fragment) OS=Homo sapiens OX=9606 GN=DKFZp434P232 PE=2 SV=2
High	V9HVX8	Epididymis luminal protein 109 OS=Homo sapiens OX=9606 GN=HEL-109 PE=2 SV=1
High	P62861	40S ribosomal protein S30 OS=Homo sapiens OX=9606 GN=FAU PE=1 SV=1
High	Q6FH17	ADP-ribosylation factor 6 OS=Homo sapiens OX=9606 GN=ARF6 PE=2 SV=1
High	B5MDQ6	Zinc finger protein 74 OS=Homo sapiens OX=9606 GN=ZNF74 PE=1 SV=1
High	Q9BUH6	Protein PAXX OS=Homo sapiens OX=9606 GN=PAXX PE=1 SV=2
High	A0A024RAC6	Elongin-A OS=Homo sapiens OX=9606 GN=ELOA PE=1 SV=1
High	Q6FHZ0	Malate dehydrogenase OS=Homo sapiens OX=9606 GN=MDH2 PE=2 SV=1
High	Q8WUH6	Transmembrane protein 263 OS=Homo sapiens OX=9606 GN=TMEM263 PE=1 SV=1
High	A0A5C2FTW9	IGL c162_light_IGKV2-30_IGKJ2 (Fragment) OS=Homo sapiens OX=9606 PE=2 SV=1
High	A0A384MTY2	Epididymis secretory sperm binding protein OS=Homo sapiens OX=9606 PE=2 SV=1
High	P82933	28S ribosomal protein S9, mitochondrial OS=Homo sapiens OX=9606 GN=MRPS9 PE=1 SV=2
High	A0A5C2FZ15	IGL c2139_light_IGKV1D-39_IGKJ4 (Fragment) OS=Homo sapiens OX=9606 PE=2 SV=1
High	H0Y9X1	Translation machinery-associated protein 16 (Fragment) OS=Homo sapiens OX=9606 GN=TMA16 PE=1 SV=1
High	Q53G59	Kelch-like protein 12 OS=Homo sapiens OX=9606 GN=KLHL12 PE=1 SV=2
High	A0A024R297	Spindlin, isoform CRA_a OS=Homo sapiens OX=9606 GN=SPIN PE=3 SV=1
High	Q0QEL2	Citrate synthase (Fragment) OS=Homo sapiens OX=9606 GN=CS PE=2 SV=1
High	Q5T440	Putative transferase CAF17, mitochondrial OS=Homo sapiens OX=9606 GN=IBA57 PE=1 SV=1
High	D6RCP9	Deoxycytidine kinase OS=Homo sapiens OX=9606 GN=DCK PE=1 SV=1
High	Q15645	Pachytene checkpoint protein 2 homolog OS=Homo sapiens OX=9606 GN=TRIP13 PE=1 SV=2
High	A0A7S5C2D1	IGH c2592_heavy_IGHV4-59B_IGHD3-9_IGHJ6 (Fragment) OS=Homo sapiens OX=9606 PE=2 SV=1
High	Q59EA0	Ubiquitin associated protein 2 isoform 3 variant (Fragment) OS=Homo sapiens OX=9606 PE=2 SV=1
High	A0A7S5BY47	IGH c312_heavy_IGHV1-2_IGHD2-21_IGHJ4 (Fragment) OS=Homo sapiens OX=9606 PE=2 SV=1
High	A0A140VK94	RAN binding protein 1, isoform CRA_g OS=Homo sapiens OX=9606 GN=RANBP1 PE=2 SV=1
High	A0A0S2Z3W7	Epididymis secretory sperm binding protein (Fragment) OS=Homo sapiens OX=9606 GN=ITPA PE=2 SV=1
High	A0A024R4H6	Kallikrein 7 (Chymotryptic, stratum corneum), isoform CRA_b OS=Homo sapiens OX=9606 GN=KLK7 PE=4 SV=1
High	F8VXU5	Vacuolar protein sorting-associated protein 29 OS=Homo sapiens OX=9606 GN=VPS29 PE=1 SV=1
High	Q9Y4K3	TNF receptor-associated factor 6 OS=Homo sapiens OX=9606 GN=TRAF6 PE=1 SV=1
High	A0A087WY55	Chromosome 6 open reading frame 55, isoform CRA_b OS=Homo sapiens OX=9606 GN=VTA1 PE=1 SV=1
High	A0A5C2GKL8	IGH + IGL c587_light_IGKV3-11_IGKJ5 (Fragment) OS=Homo sapiens OX=9606 PE=2 SV=1
High	H3BSS5	BTB/POZ domain-containing protein KCTD5 OS=Homo sapiens OX=9606 GN=KCTD5 PE=1 SV=1
High	Q9HCY8	Protein S100-A14 OS=Homo sapiens OX=9606 GN=S100A14 PE=1 SV=1
High	A0A087X2D5	39S ribosomal protein L45, mitochondrial OS=Homo sapiens OX=9606 GN=MRPL45 PE=1 SV=1
High	D6RER5	Septin OS=Homo sapiens OX=9606 GN=SEPTIN11 PE=1 SV=1
High	B4DIX0	cDNA FLJ50778, highly similar to Protein flightless-1 homolog OS=Homo sapiens OX=9606 PE=2 SV=1
High	Q59GW5	Tripartite motif-containing 25 variant (Fragment) OS=Homo sapiens OX=9606 PE=2 SV=1
High	B4DGM7	cDNA FLJ51489, highly similar to LanC-like protein 1 OS=Homo sapiens OX=9606 PE=2 SV=1
High	A0A5C2FU34	IGL c74_light_IGKV3-20_IGKJ4 (Fragment) OS=Homo sapiens OX=9606 PE=2 SV=1
High	B2RTX8	WAPAL protein OS=Homo sapiens OX=9606 GN=WAPAL PE=2 SV=1
High	A0A5C2GSN2	IG c525_light_IGKV3-15_IGKJ1 (Fragment) OS=Homo sapiens OX=9606 PE=2 SV=1
High	A0A2R8Y849	40S ribosomal protein S24 OS=Homo sapiens OX=9606 GN=RPS24 PE=1 SV=1
High	Q96DR8	Mucin-like protein 1 OS=Homo sapiens OX=9606 GN=MUCL1 PE=1 SV=1
High	B7ZB56	cDNA, FLJ79420, highly similar to Homo sapiens nebulette (NEBL), transcript variant 2, mRNA OS=Homo sapiens OX=9606 PE=2 SV=1
High	A0A5C2FWB4	IGL c400_light_IGKV2D-28_IGKJ5 (Fragment) OS=Homo sapiens OX=9606 PE=2 SV=1
High	Q4ZG57	DNA helicase (Fragment) OS=Homo sapiens OX=9606 GN=MCM6 PE=3 SV=1
High	P30085	UMP-CMP kinase OS=Homo sapiens OX=9606 GN=CMPK1 PE=1 SV=3
High	Q641R2	Oxysterol-binding protein (Fragment) OS=Homo sapiens OX=9606 GN=OSBPL8 PE=2 SV=1
High	Q59G24	Activated RNA polymerase II transcriptional coactivator p15 (Fragment) OS=Homo sapiens OX=9606 PE=2 SV=1
High	J3KR24	Isoleucyl-tRNA synthetase OS=Homo sapiens OX=9606 GN=IARS1 PE=1 SV=2
High	A0A5C2GNC4	IG c742_light_IGKV1-5_IGKJ1 (Fragment) OS=Homo sapiens OX=9606 PE=2 SV=1
High	A0A5C2GAR5	IGH + IGL c185_light_IGKV1-8_IGKJ2 (Fragment) OS=Homo sapiens OX=9606 PE=2 SV=1
High	P49207	60S ribosomal protein L34 OS=Homo sapiens OX=9606 GN=RPL34 PE=1 SV=3
High	Q6ICQ8	ARHG protein (Fragment) OS=Homo sapiens OX=9606 GN=ARHG PE=2 SV=1
High	A0A7S5C233	IGH c2214_heavy_IGHV4-39_IGHD3-22_IGHJ4 (Fragment) OS=Homo sapiens OX=9606 PE=2 SV=1
High	Q96BN2	Transcriptional adapter 1 OS=Homo sapiens OX=9606 GN=TADA1 PE=1 SV=1
High	B7Z9U9	Ubiquitinyl hydrolase 1 OS=Homo sapiens OX=9606 PE=2 SV=1
High	Q13257	Mitotic spindle assembly checkpoint protein MAD2A OS=Homo sapiens OX=9606 GN=MAD2L1 PE=1 SV=1
High	H0UI95	HCG2044836, isoform CRA_a OS=Homo sapiens OX=9606 GN=hCG_2044836 PE=4 SV=1
High	P19387	DNA-directed RNA polymerase II subunit RPB3 OS=Homo sapiens OX=9606 GN=POLR2C PE=1 SV=2
High	E9PIQ7	HCLS1-associated protein X-1 OS=Homo sapiens OX=9606 GN=HAX1 PE=1 SV=1
High	A8K5S1	cDNA FLJ78650, highly similar to Homo sapiens mucosa associated lymphoid tissue lymphoma translocation gene 1 (MALT1), transcript variant 1, mRNA OS=Homo sapiens OX=9606 PE=2 SV=1
High	Q99460	26S proteasome non-ATPase regulatory subunit 1 OS=Homo sapiens OX=9606 GN=PSMD1 PE=1 SV=2
High	Q8IZ83	Aldehyde dehydrogenase family 16 member A1 OS=Homo sapiens OX=9606 GN=ALDH16A1 PE=1 SV=2
High	A0A5C2GRQ7	IG c91_light_IGKV1-27_IGKJ4 (Fragment) OS=Homo sapiens OX=9606 PE=2 SV=1
High	Q9H3T3	Semaphorin-6B OS=Homo sapiens OX=9606 GN=SEMA6B PE=1 SV=4
High	P80188	Neutrophil gelatinase-associated lipocalin OS=Homo sapiens OX=9606 GN=LCN2 PE=1 SV=2
High	P29350	Tyrosine-protein phosphatase non-receptor type 6 OS=Homo sapiens OX=9606 GN=PTPN6 PE=1 SV=1
High	D9HTE9	Plasma membrane citrate carrier OS=Homo sapiens OX=9606 GN=SLC25A1 PE=2 SV=1
High	A0A5C2FYN0	IGL c367_light_IGLV1-44_IGLJ3 (Fragment) OS=Homo sapiens OX=9606 PE=2 SV=1
High	B5B2S4	Nuclear factor of activated T-cells c3 isoform IAL-deltaXa OS=Homo sapiens OX=9606 GN=NFATC3 PE=2 SV=1
High	A0A7S5BXF3	IGH c178_heavy_IGHV3-33_IGHD5-24_IGHJ6 (Fragment) OS=Homo sapiens OX=9606 PE=2 SV=1
High	H7BYT1	Casein kinase I isoform delta OS=Homo sapiens OX=9606 GN=CSNK1D PE=1 SV=2
High	A0A0A0MS54	cAMP-dependent protein kinase OS=Homo sapiens OX=9606 GN=PRKACB PE=1 SV=1
High	P07814	Bifunctional glutamate/proline--tRNA ligase OS=Homo sapiens OX=9606 GN=EPRS1 PE=1 SV=5
High	D3DQ69	SERPINE1 mRNA binding protein 1, isoform CRA_c OS=Homo sapiens OX=9606 GN=SERBP1 PE=4 SV=1
High	F8WBC0	Ras-related protein Rap-1b (Fragment) OS=Homo sapiens OX=9606 GN=RAP1B PE=4 SV=1
High	B4DKJ4	cDNA FLJ57738, highly similar to Translationally-controlled tumor protein OS=Homo sapiens OX=9606 PE=2 SV=1
High	Q9H2D6	TRIO and F-actin-binding protein OS=Homo sapiens OX=9606 GN=TRIOBP PE=1 SV=3
High	A0A5C2GIM3	IG c398_heavy_IGHV1-2_IGHD3-22_IGHJ3 (Fragment) OS=Homo sapiens OX=9606 PE=2 SV=1
High	H3BMV3	Jupiter microtubule-associated homolog 2 (Fragment) OS=Homo sapiens OX=9606 GN=JPT2 PE=1 SV=1
High	E9PF49	Complex I-B22 OS=Homo sapiens OX=9606 GN=NDUFB9 PE=1 SV=1
High	O60869	Endothelial differentiation-related factor 1 OS=Homo sapiens OX=9606 GN=EDF1 PE=1 SV=1
High	A0A5C2GNS8	IG c400_heavy_IGHV3-49_IGHD5-18_IGHJ4 (Fragment) OS=Homo sapiens OX=9606 PE=2 SV=1
High	A0A5C2G0L4	IGL c1515_light_IGLV1-40_IGLJ3 (Fragment) OS=Homo sapiens OX=9606 PE=2 SV=1
High	Q96CT6	C12orf10 protein (Fragment) OS=Homo sapiens OX=9606 GN=C12orf10 PE=2 SV=2
High	H3BN59	RNA helicase (Fragment) OS=Homo sapiens OX=9606 PE=1 SV=1
High	A9QM74	Importin subunit alpha-8 OS=Homo sapiens OX=9606 GN=KPNA7 PE=1 SV=1
High	O95456	Proteasome assembly chaperone 1 OS=Homo sapiens OX=9606 GN=PSMG1 PE=1 SV=1
High	A0A7S5EVI4	IGH c2310_heavy_IGHV1-46_IGHD2-2_IGHJ6 (Fragment) OS=Homo sapiens OX=9606 PE=2 SV=1
High	A0A384MDW7	Enoyl Coenzyme A hydratase, short chain, 1, mitochondrial OS=Homo sapiens OX=9606 GN=ECHS1 PE=2 SV=1
High	A0A5C2GLX3	IG c515_heavy_IGHV1-69_IGHD2-15_IGHJ3 (Fragment) OS=Homo sapiens OX=9606 PE=2 SV=1
High	B3KNQ8	cDNA FLJ30174 fis, clone BRACE2000975, highly similar to Sodium/potassium-transporting ATPase alpha-3 chain OS=Homo sapiens OX=9606 PE=2 SV=1
High	A0A5C2GDJ7	IGH + IGL c170_light_IGKV3-11_IGKJ5 (Fragment) OS=Homo sapiens OX=9606 PE=2 SV=1
High	Q9P015	39S ribosomal protein L15, mitochondrial OS=Homo sapiens OX=9606 GN=MRPL15 PE=1 SV=1
High	Q92979	Ribosomal RNA small subunit methyltransferase NEP1 OS=Homo sapiens OX=9606 GN=EMG1 PE=1 SV=4
High	A8K4V4	cDNA FLJ76392, highly similar to Homo sapiens mitochondrial ribosomal protein L43 (MRPL43), transcript variant 1, mRNA OS=Homo sapiens OX=9606 PE=2 SV=1
High	A0A5C2GKE9	IGH + IGL c507_light_IGKV1-5_IGKJ1 (Fragment) OS=Homo sapiens OX=9606 PE=2 SV=1
High	Q6N008	Uncharacterized protein DKFZp686I03263 (Fragment) OS=Homo sapiens OX=9606 GN=DKFZp686I03263 PE=2 SV=1
High	A0A494BYR6	Kinesin-like protein OS=Homo sapiens OX=9606 GN=KIF18B PE=1 SV=1
High	P55081	Microfibrillar-associated protein 1 OS=Homo sapiens OX=9606 GN=MFAP1 PE=1 SV=2
High	P35270	Sepiapterin reductase OS=Homo sapiens OX=9606 GN=SPR PE=1 SV=1
High	A0A024R1X0	Protein CASC3 OS=Homo sapiens OX=9606 GN=CASC3 PE=3 SV=1
High	P17900	Ganglioside GM2 activator OS=Homo sapiens OX=9606 GN=GM2A PE=1 SV=4
High	Q2VIL4	RcDNAJ9 (Fragment) OS=Homo sapiens OX=9606 PE=4 SV=1
High	V9HWE1	Vimentin OS=Homo sapiens OX=9606 GN=HEL113 PE=2 SV=1
High	A0A5C2G170	IGL c1922_light_IGKV1-9_IGKJ4 (Fragment) OS=Homo sapiens OX=9606 PE=2 SV=1
High	M0R1B0	ER membrane protein complex subunit 8 (Fragment) OS=Homo sapiens OX=9606 GN=EMC8 PE=1 SV=1
High	O75635	Serpin B7 OS=Homo sapiens OX=9606 GN=SERPINB7 PE=1 SV=1
High	A0A5C2FXQ9	IGL c1719_light_IGKV1-27_IGKJ2 (Fragment) OS=Homo sapiens OX=9606 PE=2 SV=1
High	Q53SB5	Desmin, isoform CRA_a OS=Homo sapiens OX=9606 GN=tmp_locus_29 PE=3 SV=1
High	O95969	Secretoglobin family 1D member 2 OS=Homo sapiens OX=9606 GN=SCGB1D2 PE=2 SV=1
High	H0Y4T6	Peptidylprolyl isomerase OS=Homo sapiens OX=9606 GN=PIN4 PE=1 SV=2
High	Q86X29	Lipolysis-stimulated lipoprotein receptor OS=Homo sapiens OX=9606 GN=LSR PE=1 SV=4
High	Q9H2R8	CGI16-iso OS=Homo sapiens OX=9606 PE=2 SV=1
High	M0R061	Coatomer subunit epsilon OS=Homo sapiens OX=9606 GN=COPE PE=1 SV=1
High	A0A024RB22	SWI/SNF related, matrix associated, actin dependent regulator of chromatin, subfamily c, member 2, isoform CRA_a OS=Homo sapiens OX=9606 GN=SMARCC2 PE=4 SV=1
High	A0A5C2H2W5	IG c1326_light_IGKV1-5_IGKJ1 (Fragment) OS=Homo sapiens OX=9606 PE=2 SV=1
High	A0A5C2G6C8	IGH c227_heavy__IGHV1-2_IGHD3-22_IGHJ4 (Fragment) OS=Homo sapiens OX=9606 PE=2 SV=1
High	Q6ZMU0	Delta-aminolevulinic acid dehydratase OS=Homo sapiens OX=9606 PE=2 SV=1
High	A0A494C0Z5	Ras-related protein Rab-33B OS=Homo sapiens OX=9606 GN=RAB33B PE=1 SV=1
High	Q9Y2Z0	Protein SGT1 homolog OS=Homo sapiens OX=9606 GN=SUGT1 PE=1 SV=3
High	Q9Y3A5	Ribosome maturation protein SBDS OS=Homo sapiens OX=9606 GN=SBDS PE=1 SV=4
High	B4DRN6	cDNA FLJ51284, highly similar to Adapter-relatedprotein complex 3 mu-1 subunit OS=Homo sapiens OX=9606 PE=2 SV=1
High	A0A5C2FYN4	IGL c1340_light_IGKV1-17_IGKJ1 (Fragment) OS=Homo sapiens OX=9606 PE=2 SV=1
High	A0A5C2GX14	IG c220_light_IGKV2D-29_IGKJ1 (Fragment) OS=Homo sapiens OX=9606 PE=2 SV=1
High	J3QQM1	26S proteasome regulatory subunit 8 (Fragment) OS=Homo sapiens OX=9606 GN=PSMC5 PE=1 SV=1
High	H0YLY7	Calcineurin B homologous protein 1 (Fragment) OS=Homo sapiens OX=9606 GN=CHP1 PE=1 SV=1
High	A0A087WWI4	Hypoxia up-regulated protein 1 OS=Homo sapiens OX=9606 GN=HYOU1 PE=1 SV=1
High	A0A5C2GBI1	IGH + IGL c562_light_IGKV1-5_IGKJ2 (Fragment) OS=Homo sapiens OX=9606 PE=2 SV=1
High	A0A5C2GP92	IG c889_light_IGKV3-15_IGKJ1 (Fragment) OS=Homo sapiens OX=9606 PE=2 SV=1
High	B4E1J8	cDNA FLJ56285, highly similar to ADP-ribosylation factor-like protein 8B OS=Homo sapiens OX=9606 PE=2 SV=1
High	E9PQ15	Plakophilin-3 (Fragment) OS=Homo sapiens OX=9606 GN=PKP3 PE=1 SV=2
High	O75330	Hyaluronan mediated motility receptor OS=Homo sapiens OX=9606 GN=HMMR PE=1 SV=2
High	A0A0S2Z4R1	Tyrosine--tRNA ligase (Fragment) OS=Homo sapiens OX=9606 GN=YARS PE=2 SV=1
High	A0A5C2G703	IGL c168_light_IGKV1-12_IGKJ5 (Fragment) OS=Homo sapiens OX=9606 PE=2 SV=1
High	Q9BXS6	Nucleolar and spindle-associated protein 1 OS=Homo sapiens OX=9606 GN=NUSAP1 PE=1 SV=1
High	Q8NFV4	Protein ABHD11 OS=Homo sapiens OX=9606 GN=ABHD11 PE=1 SV=1
High	H0YEP3	Probable aminopeptidase NPEPL1 (Fragment) OS=Homo sapiens OX=9606 GN=NPEPL1 PE=1 SV=1
High	Q9NQT5	Exosome complex component RRP40 OS=Homo sapiens OX=9606 GN=EXOSC3 PE=1 SV=3
High	Q8N9Q7	Coiled-coil domain containing 44, isoform CRA_a OS=Homo sapiens OX=9606 GN=CCDC44 PE=2 SV=1
High	A0A0S2Z4Z8	Receptor-interacting serine-threonine kinase 2 isoform 1 (Fragment) OS=Homo sapiens OX=9606 GN=RIPK2 PE=2 SV=1
High	A0A024R1Z1	Cell division cycle 34, isoform CRA_a OS=Homo sapiens OX=9606 GN=CDC34 PE=3 SV=1
High	A0A0U1RQT9	Synaptophysin-like protein 1 (Fragment) OS=Homo sapiens OX=9606 GN=SYPL1 PE=1 SV=1
High	C9JH72	Replication factor C subunit 5 (Fragment) OS=Homo sapiens OX=9606 GN=RFC5 PE=1 SV=1
High	A0A024RDY3	Lysosomal-associated membrane protein 1, isoform CRA_a OS=Homo sapiens OX=9606 GN=LAMP1 PE=3 SV=1
High	P57735	Ras-related protein Rab-25 OS=Homo sapiens OX=9606 GN=RAB25 PE=1 SV=2
High	P56545	C-terminal-binding protein 2 OS=Homo sapiens OX=9606 GN=CTBP2 PE=1 SV=1
High	Q9P035	Very-long-chain (3R)-3-hydroxyacyl-CoA dehydratase 3 OS=Homo sapiens OX=9606 GN=HACD3 PE=1 SV=2
High	Q12904	Aminoacyl tRNA synthase complex-interacting multifunctional protein 1 OS=Homo sapiens OX=9606 GN=AIMP1 PE=1 SV=2
High	G8JLB3	tRNA pseudouridine synthase A (Fragment) OS=Homo sapiens OX=9606 GN=PUS1 PE=1 SV=1
High	F5GXG6	General transcription factor IIH subunit 3 (Fragment) OS=Homo sapiens OX=9606 GN=GTF2H3 PE=1 SV=1
High	A0A7S5C2A3	IGH c2319_heavy_IGHV4-34_IGHD5-18_IGHJ6 (Fragment) OS=Homo sapiens OX=9606 PE=2 SV=1
High	E5RGR0	Acyl-protein thioesterase 1 (Fragment) OS=Homo sapiens OX=9606 GN=LYPLA1 PE=1 SV=1
High	P17152	Transmembrane protein 11, mitochondrial OS=Homo sapiens OX=9606 GN=TMEM11 PE=1 SV=1
High	J3KQ69	DNA helicase OS=Homo sapiens OX=9606 GN=MCM3 PE=1 SV=3
High	A0A2U8J956	Ig heavy chain variable region (Fragment) OS=Homo sapiens OX=9606 GN=IgH PE=2 SV=1
High	B7Z8Z6	DNA replication licensing factor MCM2 OS=Homo sapiens OX=9606 PE=2 SV=1
High	P30740	Leukocyte elastase inhibitor OS=Homo sapiens OX=9606 GN=SERPINB1 PE=1 SV=1
High	A0A7P0TB41	Cathepsin Z OS=Homo sapiens OX=9606 GN=CTSZ PE=4 SV=1
High	P01024	Complement C3 OS=Homo sapiens OX=9606 GN=C3 PE=1 SV=2
High	V9HW05	Epididymis luminal protein 210 OS=Homo sapiens OX=9606 GN=HEL-210 PE=2 SV=1
High	A0A5C2G4U3	IGL c3456_light_IGKV4-1_IGKJ1 (Fragment) OS=Homo sapiens OX=9606 PE=2 SV=1
High	F5GZS6	4F2 cell-surface antigen heavy chain OS=Homo sapiens OX=9606 GN=SLC3A2 PE=1 SV=1
High	Q5T093	Protein RER1 OS=Homo sapiens OX=9606 GN=RER1 PE=1 SV=1
High	H0YCD5	39S ribosomal protein L11, mitochondrial (Fragment) OS=Homo sapiens OX=9606 GN=MRPL11 PE=1 SV=1
High	A0A087WT48	DnaJ homolog subfamily A member 2 (Fragment) OS=Homo sapiens OX=9606 GN=DNAJA2 PE=1 SV=1
High	Q00534	Cyclin-dependent kinase 6 OS=Homo sapiens OX=9606 GN=CDK6 PE=1 SV=1
High	A0A5C2H014	IG c1278_light_IGKV1-5_IGKJ1 (Fragment) OS=Homo sapiens OX=9606 PE=2 SV=1
High	A0A5C2FY90	IGL c1931_light_IGKV3-20_IGKJ3 (Fragment) OS=Homo sapiens OX=9606 PE=2 SV=1
High	H3BPG7	Anamorsin OS=Homo sapiens OX=9606 GN=CIAPIN1 PE=1 SV=1
High	A0A7S5ETT6	IGH c1051_heavy_IGHV1-69_IGHD5-12_IGHJ4 (Fragment) OS=Homo sapiens OX=9606 PE=2 SV=1
High	A0A087WYT3	Prostaglandin E synthase 3 OS=Homo sapiens OX=9606 GN=PTGES3 PE=1 SV=1
High	M0R2N5	Very-long-chain enoyl-CoA reductase OS=Homo sapiens OX=9606 GN=TECR PE=1 SV=1
High	Q92576	PHD finger protein 3 OS=Homo sapiens OX=9606 GN=PHF3 PE=1 SV=3
High	A0A5C2GU77	IG c1010_light_IGKV4-1_IGKJ4 (Fragment) OS=Homo sapiens OX=9606 PE=2 SV=1
High	A0A5C2G1I6	IGL c3131_light_IGKV3-20_IGKJ4 (Fragment) OS=Homo sapiens OX=9606 PE=2 SV=1
High	A0A097Q0T5	Cytochrome c oxidase subunit 2 OS=Homo sapiens OX=9606 GN=COX2 PE=3 SV=1
High	A0A5C2GUY6	IG c583_light_IGKV1-5_IGKJ4 (Fragment) OS=Homo sapiens OX=9606 PE=2 SV=1
High	A0A494C1S7	General transcription factor 3C polypeptide 3 OS=Homo sapiens OX=9606 GN=GTF3C3 PE=1 SV=1
High	A0A5C2H271	IG c1046_light_IGKV1-5_IGKJ3 (Fragment) OS=Homo sapiens OX=9606 PE=2 SV=1
High	B3KRY5	cDNA FLJ35087 fis, clone PLACE6005546, highly similar to Polymerase I and transcript release factor OS=Homo sapiens OX=9606 PE=2 SV=1
High	P25786	Proteasome subunit alpha type-1 OS=Homo sapiens OX=9606 GN=PSMA1 PE=1 SV=1
High	D3DUR9	Zinc finger protein 384, isoform CRA_a OS=Homo sapiens OX=9606 GN=ZNF384 PE=4 SV=1
High	A0A3B3ISH4	Protein phosphatase 1 regulatory subunit 12A (Fragment) OS=Homo sapiens OX=9606 GN=PPP1R12A PE=1 SV=1
High	Q53HB3	Proteasome 26S ATPase subunit 1 variant (Fragment) OS=Homo sapiens OX=9606 PE=2 SV=1
High	A0A5C2GHD1	IG c462_light_IGKV1D-39_IGKJ2 (Fragment) OS=Homo sapiens OX=9606 PE=2 SV=1
High	A0A024RDT6	SPRY domain-containing protein 7 OS=Homo sapiens OX=9606 GN=C13orf1 PE=2 SV=1
High	V9HWH0	Epididymis luminal protein 164 OS=Homo sapiens OX=9606 GN=HEL164 PE=1 SV=1
High	A0A7S5EWT1	IGH c2462_heavy_IGHV3-23_IGHD6-19_IGHJ6 (Fragment) OS=Homo sapiens OX=9606 PE=2 SV=1
High	Q5JU67	Cilia- and flagella-associated protein 157 OS=Homo sapiens OX=9606 GN=CFAP157 PE=2 SV=1
High	A0A5C2G289	IGL c3262_light_IGKV1D-39_IGKJ1 (Fragment) OS=Homo sapiens OX=9606 PE=2 SV=1
High	P61513	60S ribosomal protein L37a OS=Homo sapiens OX=9606 GN=RPL37A PE=1 SV=2
High	A0A5C2G3C9	IGL c3424_light_IGKV3-20_IGKJ1 (Fragment) OS=Homo sapiens OX=9606 PE=2 SV=1
High	A6NFK2	Glutaredoxin domain-containing cysteine-rich protein 2 OS=Homo sapiens OX=9606 GN=GRXCR2 PE=3 SV=1
High	A0A5C2G324	IGL c3314_light_IGKV3-11_IGKJ2 (Fragment) OS=Homo sapiens OX=9606 PE=2 SV=1
High	A8K897	Nuclear pore complex protein Nup93 OS=Homo sapiens OX=9606 PE=2 SV=1
High	B3KTV8	cDNA FLJ38830 fis, clone MESAN1000080, highly similar to ERBB receptor feedback inhibitor 1 OS=Homo sapiens OX=9606 PE=2 SV=1
High	A0A140VK46	Proteasome subunit beta OS=Homo sapiens OX=9606 PE=2 SV=1
High	A0A5C2GC60	IGL c291_light_IGKV1D-39_IGKJ1 (Fragment) OS=Homo sapiens OX=9606 PE=2 SV=1
High	A0A5C2GGL3	IGH + IGL c559_light_IGKV1D-39_IGKJ1 (Fragment) OS=Homo sapiens OX=9606 PE=2 SV=1
High	J3QS85	COP9 signalosome complex subunit 3 OS=Homo sapiens OX=9606 GN=COPS3 PE=1 SV=1
High	A0A5C2GTP9	IG c864_light_IGKV1D-13_IGKJ1 (Fragment) OS=Homo sapiens OX=9606 PE=2 SV=1
High	A0A5C2GA50	IGH + IGL c603_heavy_IGHV1-69_IGHD7-27_IGHJ3 (Fragment) OS=Homo sapiens OX=9606 PE=2 SV=1
High	Q99569	Plakophilin-4 OS=Homo sapiens OX=9606 GN=PKP4 PE=1 SV=2
High	B3KX15	cDNA FLJ44468 fis, clone UTERU2026025, moderately similar to SPLICING FACTOR, ARGININE/SERINE-RICH 2 OS=Homo sapiens OX=9606 PE=2 SV=1
High	A0A024RAM2	Glutaredoxin (Thioltransferase), isoform CRA_c OS=Homo sapiens OX=9606 GN=GLRX PE=4 SV=1
High	B4DTT7	cDNA FLJ53458, highly similar to SAPS domain family member 3 OS=Homo sapiens OX=9606 PE=2 SV=1
High	Q9GZN8	UPF0687 protein C20orf27 OS=Homo sapiens OX=9606 GN=C20orf27 PE=1 SV=3
High	B3KUG0	cDNA FLJ39778 fis, clone SPLEN2001710, highly similar to Kelch domain-containing protein 4 OS=Homo sapiens OX=9606 PE=2 SV=1
High	A0A5C2GY35	IG c1813_light_IGKV1D-39_IGKJ1 (Fragment) OS=Homo sapiens OX=9606 PE=2 SV=1
High	A0A140VK39	Protein phosphatase methylesterase 1 OS=Homo sapiens OX=9606 PE=2 SV=1
High	A0A5C2GUE5	IG c1144_light_IGKV1-5_IGKJ4 (Fragment) OS=Homo sapiens OX=9606 PE=2 SV=1
High	A0A5C2GAI3	IGL c432_light_IGKV1-5_IGKJ1 (Fragment) OS=Homo sapiens OX=9606 PE=2 SV=1
High	F8WEF5	PHD and RING finger domain-containing protein 1 OS=Homo sapiens OX=9606 GN=PHRF1 PE=1 SV=1
High	A0A5C2G0D2	IGL c2404_light_IGKV1D-39_IGKJ3 (Fragment) OS=Homo sapiens OX=9606 PE=2 SV=1
High	Q04323	UBX domain-containing protein 1 OS=Homo sapiens OX=9606 GN=UBXN1 PE=1 SV=2
High	Q9NYS0	NF-kappa-B inhibitor-interacting Ras-like protein 1 OS=Homo sapiens OX=9606 GN=NKIRAS1 PE=1 SV=1
High	A0A5C2FWX4	IGL c35_light_IGKV1-12_IGKJ2 (Fragment) OS=Homo sapiens OX=9606 PE=2 SV=1
High	Q6P1N4	IQGAP1 protein (Fragment) OS=Homo sapiens OX=9606 GN=IQGAP1 PE=2 SV=1
High	A0A024R711	E3 ubiquitin-protein ligase OS=Homo sapiens OX=9606 GN=WWP2 PE=4 SV=1
High	A0A5C2G0Q9	IGL c2831_light_IGKV1D-39_IGKJ4 (Fragment) OS=Homo sapiens OX=9606 PE=2 SV=1
High	A0A5C2GZ77	IG c1090_light_IGKV1-12_IGKJ3 (Fragment) OS=Homo sapiens OX=9606 PE=2 SV=1
High	P49639	Homeobox protein Hox-A1 OS=Homo sapiens OX=9606 GN=HOXA1 PE=1 SV=2
High	Q53FB7	Thymidylate synthase (Fragment) OS=Homo sapiens OX=9606 PE=2 SV=1
High	A0A024QZR3	Protein pelota homolog OS=Homo sapiens OX=9606 GN=hCG_2002731 PE=3 SV=1
High	A0A7S5C045	IGH c1372_heavy_IGHV3-53_IGHD3-10_IGHJ3 (Fragment) OS=Homo sapiens OX=9606 PE=2 SV=1
High	A0A0S2Z4Q6	Hydroxysteroid dehydrogenase 4 isoform 4 OS=Homo sapiens OX=9606 GN=HSD17B4 PE=2 SV=1
High	Q9NSH2	Uncharacterized protein DKFZp547B243 (Fragment) OS=Homo sapiens OX=9606 GN=DKFZp547B243 PE=2 SV=1
High	A0A0C4DH29	Immunoglobulin heavy variable 1-3 OS=Homo sapiens OX=9606 GN=IGHV1-3 PE=3 SV=1
High	Q9H072	Uncharacterized protein DKFZp586J151 OS=Homo sapiens OX=9606 GN=DKFZp586J151 PE=2 SV=1
High	A0A5C2GCM1	IGL c471_light_IGKV1D-39_IGKJ1 (Fragment) OS=Homo sapiens OX=9606 PE=2 SV=1
High	A0A5C2GBN0	IGL c121_light_IGKV3-15_IGKJ3 (Fragment) OS=Homo sapiens OX=9606 PE=2 SV=1
High	Q6NSD4	Glutathione peroxidase OS=Homo sapiens OX=9606 GN=GPX1 PE=2 SV=1
High	A0A024RCA6	Solute carrier family 25 (Mitochondrial carrier: glutamate), member 22, isoform CRA_a OS=Homo sapiens OX=9606 GN=SLC25A22 PE=3 SV=1
High	A0A6Q8JH89	Serpin A9 OS=Homo sapiens OX=9606 GN=SERPINA9 PE=3 SV=1
High	A0A5C2G2S2	IGL c3214_light_IGKV1D-39_IGKJ1 (Fragment) OS=Homo sapiens OX=9606 PE=2 SV=1
High	A0A5C2FVZ6	IGL c186_light_IGKV1-33_IGKJ2 (Fragment) OS=Homo sapiens OX=9606 PE=2 SV=1
High	Q5TZP7	DNA-(apurinic or apyrimidinic site) endonuclease OS=Homo sapiens OX=9606 GN=APEX1 PE=2 SV=1
High	Q53RT3	Retroviral-like aspartic protease 1 OS=Homo sapiens OX=9606 GN=ASPRV1 PE=1 SV=1
High	A0A5C2GIE4	IG c1217_heavy_IGHV4-61_IGHD4-23_IGHJ1 (Fragment) OS=Homo sapiens OX=9606 PE=2 SV=1
High	A0A5C2FYZ5	IGL c487_light_IGKV1-5_IGKJ1 (Fragment) OS=Homo sapiens OX=9606 PE=2 SV=1
High	Q56A73	Spindlin-4 OS=Homo sapiens OX=9606 GN=SPIN4 PE=1 SV=1
High	A0A5C2GJU0	IG c975_heavy_IGHV3-66_IGHD3-3_IGHJ6 (Fragment) OS=Homo sapiens OX=9606 PE=2 SV=1
High	A0A5C2G657	IGH c456_heavy__IGHV1-69_IGHD3-10_IGHJ2 (Fragment) OS=Homo sapiens OX=9606 PE=2 SV=1
High	F8WF63	RNA-binding protein 6 OS=Homo sapiens OX=9606 GN=RBM6 PE=1 SV=1
High	Q9Y6G0	RNA-binding protein OS=Homo sapiens OX=9606 PE=2 SV=1
High	A0A5C2GXB2	IG c1079_light_IGKV3-20_IGKJ2 (Fragment) OS=Homo sapiens OX=9606 PE=2 SV=1
High	A0A5C2GSX0	IG c379_light_IGKV1D-33_IGKJ3 (Fragment) OS=Homo sapiens OX=9606 PE=2 SV=1
High	A0A024R3R5	3-beta-hydroxysterol Delta (14)-reductase OS=Homo sapiens OX=9606 GN=LBR PE=3 SV=1
High	P01116	GTPase KRas OS=Homo sapiens OX=9606 GN=KRAS PE=1 SV=1
High	A0A5C2G6K6	IGH c222_heavy__IGHV4-59_IGHD6-25_IGHJ5 (Fragment) OS=Homo sapiens OX=9606 PE=2 SV=1
High	A0A7S5C1K7	IGH c2376_heavy_IGHV1-2_IGHD2-15_IGHJ5 (Fragment) OS=Homo sapiens OX=9606 PE=2 SV=1
High	A0A5C2FYM6	IGL c755_light_IGKV1-9_IGKJ1 (Fragment) OS=Homo sapiens OX=9606 PE=2 SV=1
High	A0A5C2GTL7	IG c83_light_IGLV8-61_IGLJ3 (Fragment) OS=Homo sapiens OX=9606 PE=2 SV=1
High	A0A024R8R0	SAP30 binding protein, isoform CRA_a OS=Homo sapiens OX=9606 GN=SAP30BP PE=4 SV=1
High	A0A5C2G462	IGL c4088_light_IGKV1-39_IGKJ4 (Fragment) OS=Homo sapiens OX=9606 PE=2 SV=1
High	A0A1B0GUI0	Ras-related protein Rab-9A (Fragment) OS=Homo sapiens OX=9606 GN=RAB9A PE=4 SV=1
High	A0A3B3IRR6	UPF0488 protein C8orf33 OS=Homo sapiens OX=9606 GN=C8orf33 PE=1 SV=1
High	B5BU17	E3 ubiquitin-protein ligase OS=Homo sapiens OX=9606 GN=SIAH1 PE=2 SV=1
High	A0A5C2G1A6	IGL c1715_light_IGKV1-27_IGKJ1 (Fragment) OS=Homo sapiens OX=9606 PE=2 SV=1
High	Q6FGX9	Adenylate kinase isoenzyme 1 OS=Homo sapiens OX=9606 GN=AK1 PE=2 SV=1
High	Q9H0C8	Integrin-linked kinase-associated serine/threonine phosphatase 2C OS=Homo sapiens OX=9606 GN=ILKAP PE=1 SV=1
High	A0A024R2T1	Glutathione peroxidase 1 OS=Homo sapiens OX=9606 GN=GPX1 PE=3 SV=1
High	Q53XM7	VAMP (Vesicle-associated membrane protein)-associated protein B and C OS=Homo sapiens OX=9606 GN=VAPB PE=1 SV=1
High	A0A5C2GZR3	IG c1178_light_IGLV2-23_IGLJ1 (Fragment) OS=Homo sapiens OX=9606 PE=2 SV=1
High	B2R8I2	cDNA, FLJ93914, highly similar to Homo sapiens histidine-rich glycoprotein (HRG), mRNA OS=Homo sapiens OX=9606 PE=2 SV=1
High	A0A5C2GND9	IG c1166_light_IGKV1-8_IGKJ4 (Fragment) OS=Homo sapiens OX=9606 PE=2 SV=1
High	Q9NWQ4	G patch domain-containing protein 2-like OS=Homo sapiens OX=9606 GN=GPATCH2L PE=1 SV=3
High	Q76LA1	CSTB protein OS=Homo sapiens OX=9606 GN=CSTB PE=2 SV=1
High	A0A5C2G5H8	IGH c190_heavy__IGHV1-69_IGHD4-23_IGHJ5 (Fragment) OS=Homo sapiens OX=9606 PE=2 SV=1
High	A8K3Y5	cDNA FLJ78186 OS=Homo sapiens OX=9606 PE=2 SV=1
High	Q7Z4F3	Caveolin OS=Homo sapiens OX=9606 PE=2 SV=1
High	P39019	40S ribosomal protein S19 OS=Homo sapiens OX=9606 GN=RPS19 PE=1 SV=2
High	A0A5C2G5D4	IGL c1533_light_IGLV3-25_IGLJ3 (Fragment) OS=Homo sapiens OX=9606 PE=2 SV=1
High	A0A5C2GNA4	IG c362_light_IGKV1-5_IGKJ1 (Fragment) OS=Homo sapiens OX=9606 PE=2 SV=1
High	A0A5C2G6H3	IGL c3257_light_IGKV1-39_IGKJ2 (Fragment) OS=Homo sapiens OX=9606 PE=2 SV=1
High	F5H5N2	Iron-sulfur cluster assembly enzyme ISCU, mitochondrial OS=Homo sapiens OX=9606 GN=ISCU PE=1 SV=1
High	A0A5C2GKI7	IG c842_light_IGKV1-5_IGKJ3 (Fragment) OS=Homo sapiens OX=9606 PE=2 SV=1
High	A0A5C2G094	IGL c2364_light_IGKV1-39_IGKJ1 (Fragment) OS=Homo sapiens OX=9606 PE=2 SV=1
High	Q14DR2	TRPM2 protein OS=Homo sapiens OX=9606 GN=TRPM2 PE=2 SV=1
High	P24539	ATP synthase F(0) complex subunit B1, mitochondrial OS=Homo sapiens OX=9606 GN=ATP5PB PE=1 SV=2
High	P46013	Proliferation marker protein Ki-67 OS=Homo sapiens OX=9606 GN=MKI67 PE=1 SV=2
High	Q9NZH8	Interleukin-36 gamma OS=Homo sapiens OX=9606 GN=IL36G PE=1 SV=1
High	A0A5C2H1C6	IG c1940_light_IGLV1-40_IGLJ2 (Fragment) OS=Homo sapiens OX=9606 PE=2 SV=1
High	A0A7S5BZX9	IGH c1628_heavy_IGHV3-15_IGHD2-21_IGHJ5 (Fragment) OS=Homo sapiens OX=9606 PE=2 SV=1
High	A0AVI2	Fer-1-like protein 5 OS=Homo sapiens OX=9606 GN=FER1L5 PE=2 SV=3
High	Q9Y5S9	RNA-binding protein 8A OS=Homo sapiens OX=9606 GN=RBM8A PE=1 SV=1
High	A0A5C2FZ62	IGL c2241_light_IGKV1-33_IGKJ2 (Fragment) OS=Homo sapiens OX=9606 PE=2 SV=1
High	Q8N8T3	cDNA FLJ38903 fis, clone NT2NE2001252, highly similar to HOMEOBOX PROTEIN HOX-B8 OS=Homo sapiens OX=9606 PE=2 SV=1
High	A0A5C2GK36	IG c684_light_IGKV3-20_IGKJ4 (Fragment) OS=Homo sapiens OX=9606 PE=2 SV=1
High	A0A0A0MRM9	Nucleolar and coiled-body phosphoprotein 1 (Fragment) OS=Homo sapiens OX=9606 GN=NOLC1 PE=1 SV=1
High	P0C7P4	Putative cytochrome b-c1 complex subunit Rieske-like protein 1 OS=Homo sapiens OX=9606 GN=UQCRFS1P1 PE=5 SV=1
High	A0A5C2G856	IGL c2394_light_IGKV3-20_IGKJ4 (Fragment) OS=Homo sapiens OX=9606 PE=2 SV=1
High	O60264	SWI/SNF-related matrix-associated actin-dependent regulator of chromatin subfamily A member 5 OS=Homo sapiens OX=9606 GN=SMARCA5 PE=1 SV=1
High	A0A5C2GHS0	IG c1327_light_IGKV1D-13_IGKJ2 (Fragment) OS=Homo sapiens OX=9606 PE=2 SV=1
High	Q16658	Fascin OS=Homo sapiens OX=9606 GN=FSCN1 PE=1 SV=3
High	Q13155	Aminoacyl tRNA synthase complex-interacting multifunctional protein 2 OS=Homo sapiens OX=9606 GN=AIMP2 PE=1 SV=2
High	H0YAW3	2,4-dienoyl-CoA reductase [(3E)-enoyl-CoA-producing], mitochondrial (Fragment) OS=Homo sapiens OX=9606 GN=DECR1 PE=1 SV=1
High	Q96T67	TOB3 OS=Homo sapiens OX=9606 PE=2 SV=1
High	C9J3L8	Signal sequence receptor subunit alpha OS=Homo sapiens OX=9606 GN=SSR1 PE=1 SV=1
High	E5E139	NADH-ubiquinone oxidoreductase chain 2 OS=Homo sapiens OX=9606 GN=ND2 PE=3 SV=1
High	A0A096LNZ9	Ubiquitin-like protein ISG15 (Fragment) OS=Homo sapiens OX=9606 GN=ISG15 PE=1 SV=6
High	B3KN91	Putative tRNA (cytidine(32)/guanosine(34)-2'-O)-methyltransferase OS=Homo sapiens OX=9606 GN=FTSJ1 PE=2 SV=1
High	P42357	Histidine ammonia-lyase OS=Homo sapiens OX=9606 GN=HAL PE=1 SV=1
High	A0A5C2FTR1	IGL c371_light_IGKV1-17_IGKJ3 (Fragment) OS=Homo sapiens OX=9606 PE=2 SV=1
High	A0A5C2G291	IGL c453_light_IGKV3-11_IGKJ5 (Fragment) OS=Homo sapiens OX=9606 PE=2 SV=1
High	A0A590UK80	Uncharacterized protein (Fragment) OS=Homo sapiens OX=9606 PE=3 SV=1
High	A0A5C2G2I8	IGL c2666_light_IGKV3-15_IGKJ2 (Fragment) OS=Homo sapiens OX=9606 PE=2 SV=1
High	B2RA56	Nicalin OS=Homo sapiens OX=9606 PE=2 SV=1
High	A0A3B3ISG8	Ricin B-type lectin domain-containing protein OS=Homo sapiens OX=9606 PE=1 SV=1
High	A0A1U9X7U3	HSD17B8 OS=Homo sapiens OX=9606 PE=4 SV=1
High	Q9P2B7	Cilia- and flagella-associated protein 97 OS=Homo sapiens OX=9606 GN=CFAP97 PE=1 SV=2
High	A0A087WVU6	E3 ubiquitin-protein ligase HECTD1 (Fragment) OS=Homo sapiens OX=9606 GN=HECTD1 PE=1 SV=1
High	P0DTE2	Probable non-functional immunoglobulin heavy variable 8-51-1 OS=Homo sapiens OX=9606 GN=IGHV8-51-1 PE=1 SV=1
High	C9J7B1	Protein NipSnap homolog 2 (Fragment) OS=Homo sapiens OX=9606 GN=NIPSNAP2 PE=1 SV=1
High	B4DRH6	Enoyl-CoA hydratase OS=Homo sapiens OX=9606 PE=2 SV=1
High	A0A5C2G6V4	IGL c154_light_IGKV1D-33_IGKJ4 (Fragment) OS=Homo sapiens OX=9606 PE=2 SV=1
High	Q15631	Translin OS=Homo sapiens OX=9606 GN=TSN PE=1 SV=1
High	E5RGY0	Derlin OS=Homo sapiens OX=9606 GN=DERL1 PE=1 SV=1
High	D6RAN8	39S ribosomal protein L27, mitochondrial OS=Homo sapiens OX=9606 GN=MRPL27 PE=1 SV=1
High	Q8TC04	Keratin 23 (Histone deacetylase inducible) OS=Homo sapiens OX=9606 GN=KRT23 PE=2 SV=1
High	A0A0D9SGE8	PHD finger protein 6 OS=Homo sapiens OX=9606 GN=PHF6 PE=1 SV=1
High	Q9P003	Protein cornichon homolog 4 OS=Homo sapiens OX=9606 GN=CNIH4 PE=1 SV=1
High	A0A024R2K4	Leucine rich repeat (In FLII) interacting protein 2, isoform CRA_b OS=Homo sapiens OX=9606 GN=LRRFIP2 PE=3 SV=1
High	Q68E00	Uncharacterized protein DKFZp686G2045 (Fragment) OS=Homo sapiens OX=9606 GN=DKFZp686G2045 PE=3 SV=2
High	P35251	Replication factor C subunit 1 OS=Homo sapiens OX=9606 GN=RFC1 PE=1 SV=4
High	P0DP57	Secreted Ly-6/uPAR domain-containing protein 2 OS=Homo sapiens OX=9606 GN=SLURP2 PE=1 SV=1
High	A0A024R1I0	Neurofibromin 2 (Bilateral acoustic neuroma), isoform CRA_g OS=Homo sapiens OX=9606 GN=NF2 PE=4 SV=1
High	A0A5C2GKT0	IG c944_light_IGKV1-5_IGKJ1 (Fragment) OS=Homo sapiens OX=9606 PE=2 SV=1
High	Q8NEX9	Short-chain dehydrogenase/reductase family 9C member 7 OS=Homo sapiens OX=9606 GN=SDR9C7 PE=1 SV=1
High	A0A0C4DGL3	Deoxyuridine 5'-triphosphate nucleotidohydrolase OS=Homo sapiens OX=9606 GN=DUT PE=1 SV=1
High	A0A5C2GJN9	IG c314_light_IGKV1-12_IGKJ1 (Fragment) OS=Homo sapiens OX=9606 PE=2 SV=1
High	A0A5C2G1A4	IGL c113_light_IGKV3-15_IGKJ1 (Fragment) OS=Homo sapiens OX=9606 PE=2 SV=1
High	A0A5C2GZN4	IG c1138_light_IGKV3-15_IGKJ2 (Fragment) OS=Homo sapiens OX=9606 PE=2 SV=1
High	Q6P1L8	39S ribosomal protein L14, mitochondrial OS=Homo sapiens OX=9606 GN=MRPL14 PE=1 SV=1
High	Q9NS69	Mitochondrial import receptor subunit TOM22 homolog OS=Homo sapiens OX=9606 GN=TOMM22 PE=1 SV=3
High	A0A7I2V4A6	Citron Rho-interacting kinase OS=Homo sapiens OX=9606 GN=CIT PE=1 SV=1
High	A0A5C2H1Z5	IG c966_light_IGLV2-11_IGLJ1 (Fragment) OS=Homo sapiens OX=9606 PE=2 SV=1
High	A0A7S5C3M5	IGH c3237_heavy_IGHV4-4_IGHD1-26_IGHJ6 (Fragment) OS=Homo sapiens OX=9606 PE=2 SV=1
High	P46783	40S ribosomal protein S10 OS=Homo sapiens OX=9606 GN=RPS10 PE=1 SV=1
High	J3KTL8	Structural maintenance of chromosomes flexible hinge domain-containing protein 1 (Fragment) OS=Homo sapiens OX=9606 GN=SMCHD1 PE=1 SV=1
High	E9PLX0	Calpain-1 catalytic subunit (Fragment) OS=Homo sapiens OX=9606 GN=CAPN1 PE=1 SV=1
High	P0DPB6	DNA-directed RNA polymerases I and III subunit RPAC2 OS=Homo sapiens OX=9606 GN=POLR1D PE=1 SV=1
High	P25398	40S ribosomal protein S12 OS=Homo sapiens OX=9606 GN=RPS12 PE=1 SV=3
High	Q9UMS4	Pre-mRNA-processing factor 19 OS=Homo sapiens OX=9606 GN=PRPF19 PE=1 SV=1
High	A0A5C2GYK0	IG c1772_light_IGKV2D-28_IGKJ3 (Fragment) OS=Homo sapiens OX=9606 PE=2 SV=1
High	A0A5C2GKT9	IG c713_light_IGKV1-5_IGKJ4 (Fragment) OS=Homo sapiens OX=9606 PE=2 SV=1
High	D4PHA4	GC-rich promoter binding protein 1, isoform CRA_c OS=Homo sapiens OX=9606 GN=GPBP1 PE=1 SV=1
High	A6XMH5	Beta-2-microglobulin OS=Homo sapiens OX=9606 PE=2 SV=1
High	A8K0D2	cDNA FLJ77740, highly similar to Homo sapiens 7-dehydrocholesterol reductase, mRNA OS=Homo sapiens OX=9606 PE=2 SV=1
High	A0A5C2GL10	IG c245_heavy_IGHV4-34_IGHD5-24_IGHJ4 (Fragment) OS=Homo sapiens OX=9606 PE=2 SV=1
High	A0A5C2GN57	IG c457_heavy_IGHV3-30_IGHD3-3_IGHJ4 (Fragment) OS=Homo sapiens OX=9606 PE=2 SV=1
High	J3KS15	Peptidyl-tRNA hydrolase ICT1, mitochondrial (Fragment) OS=Homo sapiens OX=9606 GN=MRPL58 PE=1 SV=1
High	H7C5V3	28S ribosomal protein S28, mitochondrial (Fragment) OS=Homo sapiens OX=9606 GN=MRPS28 PE=1 SV=8
High	A0A5C2G7M2	IGL c458_light_IGKV2D-28_IGKJ3 (Fragment) OS=Homo sapiens OX=9606 PE=2 SV=1
High	B4DQI7	cDNA FLJ58042, highly similar to Protein NipSnap1 OS=Homo sapiens OX=9606 PE=2 SV=1
High	A6NN73	Golgin subfamily A member 8C OS=Homo sapiens OX=9606 GN=GOLGA8CP PE=3 SV=2
High	Q9Y3U8	60S ribosomal protein L36 OS=Homo sapiens OX=9606 GN=RPL36 PE=1 SV=3
High	A0A5C2FTM9	IGL c341_light_IGLV7-46_IGLJ3 (Fragment) OS=Homo sapiens OX=9606 PE=2 SV=1
High	M0QY76	Zinc finger protein 36, C3H type, homolog (Mouse), isoform CRA_a OS=Homo sapiens OX=9606 GN=ZFP36 PE=1 SV=1
High	A0A5C2G8Y2	IGL c4167_light_IGKV3-20_IGKJ5 (Fragment) OS=Homo sapiens OX=9606 PE=2 SV=1
High	A0A5C2FX92	IGL c215_light_IGKV3-20_IGKJ4 (Fragment) OS=Homo sapiens OX=9606 PE=2 SV=1
High	Q9Y2S6	Translation machinery-associated protein 7 OS=Homo sapiens OX=9606 GN=TMA7 PE=1 SV=1
High	A0A5C2GT90	IG c674_light_IGLV1-40_IGLJ2 (Fragment) OS=Homo sapiens OX=9606 PE=2 SV=1
High	Q53GE3	Pyruvate dehydrogenase E1 component subunit alpha (Fragment) OS=Homo sapiens OX=9606 PE=2 SV=1
High	A0A3S8NFS6	ATIII-T1 OS=Homo sapiens OX=9606 PE=3 SV=1
High	A0A024R884	Tenascin C (Hexabrachion), isoform CRA_a OS=Homo sapiens OX=9606 GN=TNC PE=3 SV=1
High	G3V3A0	Alpha-1-antichymotrypsin OS=Homo sapiens OX=9606 GN=SERPINA3 PE=1 SV=1
High	Q53F55	dTMP kinase (Fragment) OS=Homo sapiens OX=9606 PE=2 SV=1
High	A0A5C2G0E0	IGL c1415_light_IGKV1D-39_IGKJ2 (Fragment) OS=Homo sapiens OX=9606 PE=2 SV=1
High	X6R390	AP complex subunit sigma OS=Homo sapiens OX=9606 GN=AP2S1 PE=1 SV=1
High	Q9NY86	Sulfhydryl oxidase OS=Homo sapiens OX=9606 GN=ALR PE=4 SV=1
High	R4GMQ5	Cathepsin B (Fragment) OS=Homo sapiens OX=9606 GN=CTSB PE=1 SV=1
High	Q6DKJ4	Nucleoredoxin OS=Homo sapiens OX=9606 GN=NXN PE=1 SV=2
High	P98160	Basement membrane-specific heparan sulfate proteoglycan core protein OS=Homo sapiens OX=9606 GN=HSPG2 PE=1 SV=4
High	E5RGS7	LIM zinc-binding domain-containing protein OS=Homo sapiens OX=9606 PE=4 SV=1
High	A0A5C2GAL3	IGH + IGL c296_heavy_IGHV3-33_IGHD3-3_IGHJ6 (Fragment) OS=Homo sapiens OX=9606 PE=2 SV=1
High	Q6PEJ8	HP protein OS=Homo sapiens OX=9606 GN=HP PE=2 SV=1
High	Q5H924	HECT, UBA and WWE domain containing 1 (Fragment) OS=Homo sapiens OX=9606 GN=HUWE1 PE=4 SV=1
High	B4DNH1	Profilin OS=Homo sapiens OX=9606 PE=2 SV=1
High	A4D1P6	WD repeat-containing protein 91 OS=Homo sapiens OX=9606 GN=WDR91 PE=1 SV=2
High	O15131	Importin subunit alpha-6 OS=Homo sapiens OX=9606 GN=KPNA5 PE=1 SV=2
High	A0A5C2FWP4	IGL c1369_light_IGKV1-5_IGKJ2 (Fragment) OS=Homo sapiens OX=9606 PE=2 SV=1
High	Q6ICB0	Desumoylating isopeptidase 1 OS=Homo sapiens OX=9606 GN=DESI1 PE=1 SV=1
High	B2R950	cDNA, FLJ94213, highly similar to Homo sapiens pregnancy-zone protein (PZP), mRNA OS=Homo sapiens OX=9606 PE=2 SV=1
High	Q9GZZ8	Extracellular glycoprotein lacritin OS=Homo sapiens OX=9606 GN=LACRT PE=1 SV=1
High	B4DVQ5	Eukaryotic translation initiation factor 3 subunit C OS=Homo sapiens OX=9606 GN=EIF3C PE=2 SV=1
High	E9PHT9	Annexin OS=Homo sapiens OX=9606 GN=ANXA5 PE=1 SV=1
High	Q8N7R1	POM121-like protein 12 OS=Homo sapiens OX=9606 GN=POM121L12 PE=2 SV=3
High	P30044	Peroxiredoxin-5, mitochondrial OS=Homo sapiens OX=9606 GN=PRDX5 PE=1 SV=4
High	E5RGV4	Histone deacetylase 2 (Fragment) OS=Homo sapiens OX=9606 GN=HDAC2 PE=1 SV=1
High	A0A5C2GMX8	IG c494_heavy_IGHV3-23_IGHD4-17_IGHJ4 (Fragment) OS=Homo sapiens OX=9606 PE=2 SV=1
High	K7EL40	Septin-9 (Fragment) OS=Homo sapiens OX=9606 GN=SEPTIN9 PE=1 SV=1
High	B4DWC4	Chloride intracellular channel protein OS=Homo sapiens OX=9606 PE=2 SV=1
High	Q6E0U4	Dermokine OS=Homo sapiens OX=9606 GN=DMKN PE=1 SV=3
High	A8K5D5	cDNA FLJ76832, highly similar to Homo sapiens mitochondrial ribosomal protein L19 (MRPL19), mRNA OS=Homo sapiens OX=9606 PE=2 SV=1
High	Q9UN70	Protocadherin gamma-C3 OS=Homo sapiens OX=9606 GN=PCDHGC3 PE=1 SV=1
High	A8K0B9	rRNA adenine N(6)-methyltransferase OS=Homo sapiens OX=9606 PE=2 SV=1
High	B1AJY5	26S proteasome non-ATPase regulatory subunit 10 OS=Homo sapiens OX=9606 GN=PSMD10 PE=1 SV=1
High	H3BUQ9	Na(+)/H(+) exchange regulatory cofactor NHE-RF2 (Fragment) OS=Homo sapiens OX=9606 GN=SLC9A3R2 PE=1 SV=1
High	G3V1L9	Tight junction protein ZO-1 OS=Homo sapiens OX=9606 GN=TJP1 PE=1 SV=2
High	Q8IXM3	39S ribosomal protein L41, mitochondrial OS=Homo sapiens OX=9606 GN=MRPL41 PE=1 SV=1
High	A0A5C2GVZ4	IG c1023_light_IGLV2-23_IGLJ2 (Fragment) OS=Homo sapiens OX=9606 PE=2 SV=1
High	A0A7S5C6R7	IGH c3190_heavy_IGHV4-34_IGHD3-10_IGHJ6 (Fragment) OS=Homo sapiens OX=9606 PE=2 SV=1
High	A0A5C2GU09	IG c79_light_IGLV1-40_IGLJ1 (Fragment) OS=Homo sapiens OX=9606 PE=2 SV=1
High	A0A5C2GQZ5	IG c986_light_IGKV2D-28_IGKJ4 (Fragment) OS=Homo sapiens OX=9606 PE=2 SV=1
High	F8WEW9	Unconventional myosin-Ig OS=Homo sapiens OX=9606 GN=MYO1G PE=1 SV=1
High	A0A7T0LNR8	Immunglobulin heavy chain variable region (Fragment) OS=Homo sapiens OX=9606 PE=2 SV=1
High	Q5STJ7	Hexosyltransferase OS=Homo sapiens OX=9606 GN=B3GALT4 PE=2 SV=1
High	Q96DV4	39S ribosomal protein L38, mitochondrial OS=Homo sapiens OX=9606 GN=MRPL38 PE=1 SV=2
High	A0A5C2FZB6	IGL c1506_light_IGKV1-5_IGKJ1 (Fragment) OS=Homo sapiens OX=9606 PE=2 SV=1
High	B4DQC5	cDNA FLJ58039, highly similar to Golgi-associated plant pathogenesis-related protein 1 OS=Homo sapiens OX=9606 PE=2 SV=1
High	I3L0J9	Pre-mRNA-processing-splicing factor 8 (Fragment) OS=Homo sapiens OX=9606 GN=PRPF8 PE=1 SV=8
High	A0A7P0T961	WW domain-containing adapter protein with coiled-coil OS=Homo sapiens OX=9606 GN=WAC PE=4 SV=1
High	H0Y8G4	ADP-ribosyl cyclase/cyclic ADP-ribose hydrolase (Fragment) OS=Homo sapiens OX=9606 GN=BST1 PE=1 SV=1
High	Q9Y266	Nuclear migration protein nudC OS=Homo sapiens OX=9606 GN=NUDC PE=1 SV=1
High	H0YLH6	Cytosolic iron-sulfur assembly component 2A OS=Homo sapiens OX=9606 GN=CIAO2A PE=1 SV=1
High	A0A5C2GHN1	IG c342_light_IGKV1-27_IGKJ5 (Fragment) OS=Homo sapiens OX=9606 PE=2 SV=1
High	A0A494C105	Major facilitator superfamily domain-containing protein 1 OS=Homo sapiens OX=9606 GN=MFSD1 PE=1 SV=1
High	J3KQ48	Aminoacyl-tRNA hydrolase OS=Homo sapiens OX=9606 GN=PTRH2 PE=1 SV=1
High	H0YME5	Non-specific serine/threonine protein kinase (Fragment) OS=Homo sapiens OX=9606 GN=EIF2AK4 PE=1 SV=1
High	A0A5C2G819	IGL c170_light_IGLV3-21_IGLJ3 (Fragment) OS=Homo sapiens OX=9606 PE=2 SV=1
High	A8K4N2	DNA topoisomerase OS=Homo sapiens OX=9606 PE=2 SV=1
High	H0YBU9	RNA-binding protein with multiple-splicing (Fragment) OS=Homo sapiens OX=9606 GN=RBPMS PE=1 SV=1
High	A0A024R7X7	Double-stranded RNA-binding protein Staufen homolog 2 OS=Homo sapiens OX=9606 GN=STAU2 PE=4 SV=1
High	A0A5C2G4J5	IGL c4122_light_IGKV1-39_IGKJ1 (Fragment) OS=Homo sapiens OX=9606 PE=2 SV=1
High	P07942	Laminin subunit beta-1 OS=Homo sapiens OX=9606 GN=LAMB1 PE=1 SV=2
High	Q597H1	N-myc downstream-regulated gene 1 protein OS=Homo sapiens OX=9606 GN=TRG14 PE=2 SV=1
High	D6RBQ6	Ubiquitin carboxyl-terminal hydrolase 17-like protein 17 OS=Homo sapiens OX=9606 GN=USP17L17 PE=3 SV=1
High	Q12834	Cell division cycle protein 20 homolog OS=Homo sapiens OX=9606 GN=CDC20 PE=1 SV=2
High	O95183	Vesicle-associated membrane protein 5 OS=Homo sapiens OX=9606 GN=VAMP5 PE=1 SV=1
High	E9PSG2	CKLF-CMTM1 readthrough OS=Homo sapiens OX=9606 GN=CKLF-CMTM1 PE=1 SV=1
High	S4R3B5	Protein transport protein Sec61 subunit beta OS=Homo sapiens OX=9606 GN=SEC61B PE=1 SV=1
High	P62304	Small nuclear ribonucleoprotein E OS=Homo sapiens OX=9606 GN=SNRPE PE=1 SV=1
High	E9PPI9	Exosome complex component RRP41 OS=Homo sapiens OX=9606 GN=EXOSC4 PE=1 SV=1
High	Q13637	Ras-related protein Rab-32 OS=Homo sapiens OX=9606 GN=RAB32 PE=1 SV=3
High	A0A5C2FXA7	IGL c1688_light_IGKV1-39_IGKJ4 (Fragment) OS=Homo sapiens OX=9606 PE=2 SV=1
High	Q96ID3	SAPS1 protein (Fragment) OS=Homo sapiens OX=9606 GN=SAPS1 PE=2 SV=1
High	Q86Z23	Complement C1q-like protein 4 OS=Homo sapiens OX=9606 GN=C1QL4 PE=1 SV=1
High	A0A286YFA2	D-3-phosphoglycerate dehydrogenase OS=Homo sapiens OX=9606 GN=PHGDH PE=1 SV=1
High	J3QR07	YTH domain-containing protein 1 OS=Homo sapiens OX=9606 GN=YTHDC1 PE=1 SV=1
High	D6RGF4	ATP-binding cassette sub-family E member 1 (Fragment) OS=Homo sapiens OX=9606 GN=ABCE1 PE=1 SV=1
High	Q9BVJ7	Dual specificity protein phosphatase 23 OS=Homo sapiens OX=9606 GN=DUSP23 PE=1 SV=1
High	A0A7S5C195	IGH c2261_heavy_IGHV4-59B_IGHD5-24_IGHJ4 (Fragment) OS=Homo sapiens OX=9606 PE=2 SV=1
High	A0A5C2G9I2	IGL c12_light_IGKV3-11_IGKJ2 (Fragment) OS=Homo sapiens OX=9606 PE=2 SV=1
High	C9JG86	Histone-lysine N-methyltransferase SETD2 (Fragment) OS=Homo sapiens OX=9606 GN=SETD2 PE=1 SV=1
High	B3KVV6	cDNA FLJ41607 fis, clone CTONG3001370, highly similar to Homo sapiens alpha-2-macroglobulin-like 1 (A2ML1), mRNA OS=Homo sapiens OX=9606 PE=2 SV=1
High	J3KT75	Mannose-P-dolichol utilization defect 1 protein (Fragment) OS=Homo sapiens OX=9606 GN=MPDU1 PE=1 SV=1
High	O43837	Isocitrate dehydrogenase [NAD] subunit beta, mitochondrial OS=Homo sapiens OX=9606 GN=IDH3B PE=1 SV=2
High	V9HW44	Epididymis secretory protein Li 303 OS=Homo sapiens OX=9606 GN=HEL-S-303 PE=2 SV=1
High	P51805	Plexin-A3 OS=Homo sapiens OX=9606 GN=PLXNA3 PE=1 SV=2
High	D6RJE6	Histidine--tRNA ligase, mitochondrial (Fragment) OS=Homo sapiens OX=9606 GN=HARS2 PE=1 SV=2
High	Q53FS4	Lectin, mannose-binding, 1 variant (Fragment) OS=Homo sapiens OX=9606 PE=2 SV=1
High	A0A5C2FWM5	IGL c1498_light_IGKV1D-39_IGKJ1 (Fragment) OS=Homo sapiens OX=9606 PE=2 SV=1
High	Q0VAN5	Tubulin folding cofactor E-like OS=Homo sapiens OX=9606 GN=TBCEL PE=2 SV=1
High	Q5BQ95	Kallikrein 13 splice variant 7 OS=Homo sapiens OX=9606 GN=KLK13 PE=2 SV=1
High	S4R3B8	Zinc finger protein 792 OS=Homo sapiens OX=9606 GN=ZNF792 PE=1 SV=1
High	A0A5C2GY03	IG c1632_light_IGKV1-5_IGKJ1 (Fragment) OS=Homo sapiens OX=9606 PE=2 SV=1
High	A0A6I8PL42	Leucyl-tRNA synthetase OS=Homo sapiens OX=9606 GN=LARS1 PE=1 SV=1
High	Q69YN4	Protein virilizer homolog OS=Homo sapiens OX=9606 GN=VIRMA PE=1 SV=2
High	A0A5C2GCN4	IGH + IGL c508_heavy_IGHV3-7_IGHD2-2_IGHJ3 (Fragment) OS=Homo sapiens OX=9606 PE=2 SV=1
High	Q6WRI0	Immunoglobulin superfamily member 10 OS=Homo sapiens OX=9606 GN=IGSF10 PE=1 SV=1
High	B4DNL5	Protein disulfide-isomerase OS=Homo sapiens OX=9606 PE=2 SV=1
High	A0A7S5C0R2	IGH c994_heavy_IGHV1-69_IGHD6-19_IGHJ4 (Fragment) OS=Homo sapiens OX=9606 PE=2 SV=1
High	Q9GZP9	Derlin-2 OS=Homo sapiens OX=9606 GN=DERL2 PE=1 SV=1
High	A0A5C2GF96	IGH + IGL c559_heavy_IGHV2-70_IGHD3-22_IGHJ5 (Fragment) OS=Homo sapiens OX=9606 PE=2 SV=1
High	J3KRV4	Dual-specificity mitogen-activated protein kinase kinase 3 (Fragment) OS=Homo sapiens OX=9606 GN=MAP2K3 PE=1 SV=1
High	A0A5C2GEF2	IGH + IGL c500_light_IGKV3-20_IGKJ1 (Fragment) OS=Homo sapiens OX=9606 PE=2 SV=1
High	H7C4K7	Uncharacterized protein (Fragment) OS=Homo sapiens OX=9606 PE=4 SV=2
High	B2MUD5	Neutrophil elastase (Fragment) OS=Homo sapiens OX=9606 GN=ELA2 PE=4 SV=1
High	A0A5C2GUT3	IG c1295_light_IGKV1-9_IGKJ4 (Fragment) OS=Homo sapiens OX=9606 PE=2 SV=1
High	A0A5C2FWW8	IGL c1588_light_IGKV1D-13_IGKJ4 (Fragment) OS=Homo sapiens OX=9606 PE=2 SV=1
High	A0A5C2GD56	IGH + IGL c513_light_IGKV1-39_IGKJ2 (Fragment) OS=Homo sapiens OX=9606 PE=2 SV=1
High	Q99557	NF-IL6 (Fragment) OS=Homo sapiens OX=9606 PE=2 SV=1
High	Q6ZVC0	Neuronal tyrosine-phosphorylated phosphoinositide-3-kinase adapter 1 OS=Homo sapiens OX=9606 GN=NYAP1 PE=2 SV=1
High	P02743	Serum amyloid P-component OS=Homo sapiens OX=9606 GN=APCS PE=1 SV=2
High	F8VU56	Protein-tyrosine-phosphatase OS=Homo sapiens OX=9606 GN=PTPRB PE=1 SV=1
High	B3KUJ0	cDNA FLJ39996 fis, clone STOMA2002166, highly similar to Splicing factor 3B subunit 4 OS=Homo sapiens OX=9606 PE=2 SV=1
High	A0A5C2FXP4	IGL c1699_light_IGKV1D-13_IGKJ3 (Fragment) OS=Homo sapiens OX=9606 PE=2 SV=1
High	F5GX32	DNA repair protein RAD52 homolog OS=Homo sapiens OX=9606 GN=RAD52 PE=1 SV=1
High	A0A5C2G013	IGL c2304_light_IGKV1-39_IGKJ4 (Fragment) OS=Homo sapiens OX=9606 PE=2 SV=1
High	B0QZ18	Copine-1 OS=Homo sapiens OX=9606 GN=CPNE1 PE=1 SV=1
High	P10599	Thioredoxin OS=Homo sapiens OX=9606 GN=TXN PE=1 SV=3
High	A0A5C2GCG4	IGH + IGL c368_light_IGKV3-20_IGKJ4 (Fragment) OS=Homo sapiens OX=9606 PE=2 SV=1
High	Q9NUQ8	ATP-binding cassette sub-family F member 3 OS=Homo sapiens OX=9606 GN=ABCF3 PE=1 SV=2
High	A0A7S5BZA2	IGH c1121_heavy_IGHV1-3_IGHD3-16_IGHJ3 (Fragment) OS=Homo sapiens OX=9606 PE=2 SV=1
High	A0A5C2FVK4	IGL c939_light_IGLV1-47_IGLJ3 (Fragment) OS=Homo sapiens OX=9606 PE=2 SV=1
High	B4E074	Notchless protein homolog 1 OS=Homo sapiens OX=9606 PE=2 SV=1
High	B4DM33	cDNA FLJ52068, highly similar to Microtubule-associated protein RP/EB family member 1 OS=Homo sapiens OX=9606 PE=2 SV=1
High	Q01085	Nucleolysin TIAR OS=Homo sapiens OX=9606 GN=TIAL1 PE=1 SV=1
High	A0A5C2GU01	IG c233_light_IGLV3-21_IGLJ3 (Fragment) OS=Homo sapiens OX=9606 PE=2 SV=1
High	Q9NX20	39S ribosomal protein L16, mitochondrial OS=Homo sapiens OX=9606 GN=MRPL16 PE=1 SV=1
High	Q71UH7	Galactokinase (Fragment) OS=Homo sapiens OX=9606 GN=GALK1 PE=3 SV=1
High	B7ZAF6	Succinate--CoA ligase [ADP-forming] subunit beta, mitochondrial OS=Homo sapiens OX=9606 GN=SUCLA2 PE=2 SV=1
High	Q9H2M9	Rab3 GTPase-activating protein non-catalytic subunit OS=Homo sapiens OX=9606 GN=RAB3GAP2 PE=1 SV=1
High	A0A5C2H3N5	IG c1636_light_IGKV1-5_IGKJ3 (Fragment) OS=Homo sapiens OX=9606 PE=2 SV=1
High	A0A140VKE3	Glutathione transferase OS=Homo sapiens OX=9606 PE=2 SV=1
High	H0Y9L8	Bifunctional lysine-specific demethylase and histidyl-hydroxylase (Fragment) OS=Homo sapiens OX=9606 GN=RIOX2 PE=1 SV=1
High	D7RF68	AGTRAP-BRAF fusion protein OS=Homo sapiens OX=9606 PE=2 SV=1
High	O95168	NADH dehydrogenase [ubiquinone] 1 beta subcomplex subunit 4 OS=Homo sapiens OX=9606 GN=NDUFB4 PE=1 SV=3
High	Q15858	Sodium channel protein type 9 subunit alpha OS=Homo sapiens OX=9606 GN=SCN9A PE=1 SV=3
High	A0A2X0U4J5	ARHGAP29 (Fragment) OS=Homo sapiens OX=9606 GN=ARHGAP29 PE=4 SV=1
High	A0A5C2GIU9	IG c78_light_IGKV1-39_IGKJ2 (Fragment) OS=Homo sapiens OX=9606 PE=2 SV=1
High	A2NH54	Immunogobulin kappa, VJ region (Fragment) OS=Homo sapiens OX=9606 PE=4 SV=1
High	O15265	Ataxin-7 OS=Homo sapiens OX=9606 GN=ATXN7 PE=1 SV=1
High	A0A5C2GTW1	IG c193_light_IGKV3-15_IGKJ2 (Fragment) OS=Homo sapiens OX=9606 PE=2 SV=1
High	Q9UJC5	SH3 domain-binding glutamic acid-rich-like protein 2 OS=Homo sapiens OX=9606 GN=SH3BGRL2 PE=1 SV=2
High	D6RCF2	Histone H2A OS=Homo sapiens OX=9606 GN=MACROH2A1 PE=1 SV=1
High	A0A7S5BZR7	IGH c1513_heavy_IGHV3-20_IGHD3-16_IGHJ4 (Fragment) OS=Homo sapiens OX=9606 PE=2 SV=1
High	Q5T4U8	Geranylgeranyl transferase type-2 subunit beta OS=Homo sapiens OX=9606 GN=RABGGTB PE=1 SV=1
High	A0A5C2GAI1	IGL c3413_light_IGLV2-11_IGLJ1 (Fragment) OS=Homo sapiens OX=9606 PE=2 SV=1
High	O43633	Charged multivesicular body protein 2a OS=Homo sapiens OX=9606 GN=CHMP2A PE=1 SV=1
High	Q5T1J5	Putative coiled-coil-helix-coiled-coil-helix domain-containing protein CHCHD2P9, mitochondrial OS=Homo sapiens OX=9606 GN=CHCHD2P9 PE=5 SV=1
High	B4DWV5	GrpE protein homolog OS=Homo sapiens OX=9606 PE=2 SV=1
High	Q86W19	Protease serine 1 (Fragment) OS=Homo sapiens OX=9606 GN=PRSS1 PE=4 SV=1
High	Q9BVM2	Protein DPCD OS=Homo sapiens OX=9606 GN=DPCD PE=1 SV=2
High	A0A7S5C495	IGH c3522_heavy_IGHV3-21_IGHD5-18_IGHJ3 (Fragment) OS=Homo sapiens OX=9606 PE=2 SV=1
High	A0PJB1	RNA-binding protein 48 (Fragment) OS=Homo sapiens OX=9606 GN=C7orf64 PE=2 SV=1
High	A0A7S5BZT2	IGH c1317_heavy_IGHV3-73_IGHD6-25_IGHJ5 (Fragment) OS=Homo sapiens OX=9606 PE=2 SV=1
High	Q6ZSJ8	Uncharacterized protein C1orf122 OS=Homo sapiens OX=9606 GN=C1orf122 PE=4 SV=2
High	A0A5C2GWP7	IG c1363_light_IGKV2-30_IGKJ1 (Fragment) OS=Homo sapiens OX=9606 PE=2 SV=1
High	P98198	Phospholipid-transporting ATPase ID OS=Homo sapiens OX=9606 GN=ATP8B2 PE=1 SV=2
High	Q86VR6	RNA helicase (Fragment) OS=Homo sapiens OX=9606 GN=DDX10 PE=2 SV=1
High	A0A087WZC4	Protein-glutamine gamma-glutamyltransferase 5 OS=Homo sapiens OX=9606 GN=TGM5 PE=1 SV=1
High	P21283	V-type proton ATPase subunit C 1 OS=Homo sapiens OX=9606 GN=ATP6V1C1 PE=1 SV=4
High	D3YTJ2	Protein SFI1 homolog OS=Homo sapiens OX=9606 GN=SFI1 PE=1 SV=1
High	A0A5C2GFB2	IG c37_heavy_IGHV4-34_IGHD5-18_IGHJ2 (Fragment) OS=Homo sapiens OX=9606 PE=2 SV=1
High	A0A5C2GVD3	IG c1277_light_IGKV1-5_IGKJ2 (Fragment) OS=Homo sapiens OX=9606 PE=2 SV=1
High	P54707	Potassium-transporting ATPase alpha chain 2 OS=Homo sapiens OX=9606 GN=ATP12A PE=1 SV=3
High	Q59EH3	Low molecular weight cytosolic acid phosphatase (Fragment) OS=Homo sapiens OX=9606 PE=2 SV=1
High	J3KS31	BUB3-interacting and GLEBS motif-containing protein ZNF207 (Fragment) OS=Homo sapiens OX=9606 GN=ZNF207 PE=1 SV=1
High	Q68DL7	Uncharacterized protein C18orf63 OS=Homo sapiens OX=9606 GN=C18orf63 PE=2 SV=2
Medium	E9PKV2	39S ribosomal protein L17, mitochondrial (Fragment) OS=Homo sapiens OX=9606 GN=MRPL17 PE=1 SV=1
Medium	P53384	Cytosolic Fe-S cluster assembly factor NUBP1 OS=Homo sapiens OX=9606 GN=NUBP1 PE=1 SV=2
Medium	A0A5C2G556	IGH c30_heavy__IGHV5-51_IGHD3-3_IGHJ4 (Fragment) OS=Homo sapiens OX=9606 PE=2 SV=1
Medium	Q9UEK9	Keratin (Fragment) OS=Homo sapiens OX=9606 GN=KRT5 PE=4 SV=1
Medium	A0A5C2GJN4	IG c773_light_IGLV2-23_IGLJ2 (Fragment) OS=Homo sapiens OX=9606 PE=2 SV=1
Medium	A0A5C2GWI4	IG c20_light_IGKV1-9_IGKJ4 (Fragment) OS=Homo sapiens OX=9606 PE=2 SV=1
Medium	A0A5C2FVL4	IGL c1098_light_IGLV1-40_IGLJ3 (Fragment) OS=Homo sapiens OX=9606 PE=2 SV=1
Medium	Q92991	Calcium/calmodulin-dependent protein kinase II delta E (Fragment) OS=Homo sapiens OX=9606 PE=2 SV=1
Medium	B5MCH7	Basic leucine zipper and W2 domain-containing protein 2 OS=Homo sapiens OX=9606 GN=BZW2 PE=1 SV=1
Medium	Q02224	Centromere-associated protein E OS=Homo sapiens OX=9606 GN=CENPE PE=1 SV=2
Medium	Q5QPJ9	Dolichol-phosphate mannosyltransferase subunit 1 (Fragment) OS=Homo sapiens OX=9606 GN=DPM1 PE=1 SV=2
Medium	P04632	Calpain small subunit 1 OS=Homo sapiens OX=9606 GN=CAPNS1 PE=1 SV=1
Medium	S6BGF5	IgG H chain OS=Homo sapiens OX=9606 PE=2 SV=1
Medium	B4DGG0	cDNA FLJ58989, moderately similar to ADP-ribosylation factor-like protein 2 OS=Homo sapiens OX=9606 PE=2 SV=1
Medium	A0A5C2GER6	IGH c531_heavy__IGHV3-33_IGHD3-10_IGHJ4 (Fragment) OS=Homo sapiens OX=9606 PE=2 SV=1
Medium	A0A5C2GBS1	IGH + IGL c188_heavy_IGHV1-69_IGHD4-17_IGHJ5 (Fragment) OS=Homo sapiens OX=9606 PE=2 SV=1
Medium	O60292	Signal-induced proliferation-associated 1-like protein 3 OS=Homo sapiens OX=9606 GN=SIPA1L3 PE=1 SV=3
Medium	E2RVJ0	Anion exchange protein OS=Homo sapiens OX=9606 GN=SLC4A1 PE=2 SV=1
Medium	A0A5C2G1Z4	IGL c3189_light_IGLV1-51_IGLJ3 (Fragment) OS=Homo sapiens OX=9606 PE=2 SV=1
Medium	Q15828	Cystatin-M OS=Homo sapiens OX=9606 GN=CST6 PE=1 SV=1
Medium	A0A5C2FXG1	IGL c1671_light_IGLV1-51_IGLJ3 (Fragment) OS=Homo sapiens OX=9606 PE=2 SV=1
Medium	A0A5C2G5P3	IGH c37_heavy__IGHV4-59B_IGHD3-9_IGHJ4 (Fragment) OS=Homo sapiens OX=9606 PE=2 SV=1
Medium	Q9UBC5	Unconventional myosin-Ia OS=Homo sapiens OX=9606 GN=MYO1A PE=1 SV=1
Medium	O60382	KIAA0324 (Fragment) OS=Homo sapiens OX=9606 GN=KIAA0324 PE=4 SV=1
Medium	L8EA09	Alternative protein SSH3 OS=Homo sapiens OX=9606 GN=SSH3 PE=4 SV=1
Medium	A0A5C2FY53	IGL c197_light_IGKV1-12_IGKJ2 (Fragment) OS=Homo sapiens OX=9606 PE=2 SV=1
Medium	A0A5C2GNU2	IG c1085_heavy_IGHV4-34_IGHD2-15_IGHJ2 (Fragment) OS=Homo sapiens OX=9606 PE=2 SV=1
Medium	Q17RB0	Retrotransposon Gag-like protein 8B OS=Homo sapiens OX=9606 GN=RTL8B PE=1 SV=1
Medium	A0A140VK07	Testicular secretory protein Li 7 OS=Homo sapiens OX=9606 PE=2 SV=1
Medium	A0A5C2G7T4	IGH c14_heavy__IGHV1-46_IGHD3-22_IGHJ4 (Fragment) OS=Homo sapiens OX=9606 PE=2 SV=1
Medium	Q6F5E8	Capping protein, Arp2/3 and myosin-I linker protein 2 OS=Homo sapiens OX=9606 GN=CARMIL2 PE=1 SV=2
Medium	B4DJ89	Polymerase (RNA) II (DNA directed) polypeptide E, 25kDa, isoform CRA_c OS=Homo sapiens OX=9606 GN=POLR2E PE=2 SV=1
Medium	E9PLW6	4'-phosphopantetheinyl transferase (Fragment) OS=Homo sapiens OX=9606 GN=AASDHPPT PE=1 SV=1
Medium	A0A5C2G2N7	IGL c3184_light_IGLV3-21_IGLJ3 (Fragment) OS=Homo sapiens OX=9606 PE=2 SV=1
Medium	Q6FI97	BAF53A protein OS=Homo sapiens OX=9606 GN=BAF53A PE=2 SV=1
Medium	A0A5C2GHB4	IG c997_light_IGKV1-8_IGKJ2 (Fragment) OS=Homo sapiens OX=9606 PE=2 SV=1
Medium	O75319	RNA/RNP complex-1-interacting phosphatase OS=Homo sapiens OX=9606 GN=DUSP11 PE=1 SV=2
Medium	A0A5C2GCE8	IGH + IGL c273_light_IGKV1-12_IGKJ4 (Fragment) OS=Homo sapiens OX=9606 PE=2 SV=1
Medium	O95342	Bile salt export pump OS=Homo sapiens OX=9606 GN=ABCB11 PE=1 SV=2
Medium	Q6IPW4	NADH dehydrogenase [ubiquinone] flavoprotein 2, mitochondrial OS=Homo sapiens OX=9606 GN=NDUFV2 PE=2 SV=1
Medium	A0A5C2H2D9	IG c1136_light_IGKV1-27_IGKJ2 (Fragment) OS=Homo sapiens OX=9606 PE=2 SV=1
Medium	A0A5C2FZ39	IGL c1944_light_IGKV1-39_IGKJ4 (Fragment) OS=Homo sapiens OX=9606 PE=2 SV=1
Medium	A8MXP9	Matrin-3 OS=Homo sapiens OX=9606 GN=MATR3 PE=1 SV=1
Medium	A0A5C2GWE2	IG c1911_heavy_IGHV1-18_IGHD3-9_IGHJ4 (Fragment) OS=Homo sapiens OX=9606 PE=2 SV=1
Medium	Q6ZRY4	RNA-binding protein with multiple splicing 2 OS=Homo sapiens OX=9606 GN=RBPMS2 PE=1 SV=1
Medium	A0A024R0A2	Ribosomal protein L37 OS=Homo sapiens OX=9606 GN=RPL37 PE=3 SV=1
Medium	A0A5C2H1B2	IG c1698_light_IGKV3-11_IGKJ2 (Fragment) OS=Homo sapiens OX=9606 PE=2 SV=1
Medium	A0A087WZ51	Tumor protein D54 OS=Homo sapiens OX=9606 GN=TPD52L2 PE=1 SV=1
Medium	A0A7S5EVH9	IGH c3571_heavy_IGHV4-39_IGHD6-13_IGHJ3 (Fragment) OS=Homo sapiens OX=9606 PE=2 SV=1
Medium	P03973	Antileukoproteinase OS=Homo sapiens OX=9606 GN=SLPI PE=1 SV=2
Medium	M0QYI6	NEDD8-conjugating enzyme Ubc12 (Fragment) OS=Homo sapiens OX=9606 GN=UBE2M PE=1 SV=1
Medium	V9GZ03	28S ribosomal protein S29, mitochondrial (Fragment) OS=Homo sapiens OX=9606 GN=DAP3 PE=1 SV=1
Medium	B4DN80	Peptidyl-prolyl cis-trans isomerase OS=Homo sapiens OX=9606 PE=2 SV=1
Medium	A0A5C2G1I2	IGL c3148_light_IGKV3-20_IGKJ2 (Fragment) OS=Homo sapiens OX=9606 PE=2 SV=1
Medium	A0A7S5C424	IGH c1390_heavy_IGHV4-59_IGHD6-19_IGHJ6 (Fragment) OS=Homo sapiens OX=9606 PE=2 SV=1
Medium	L0R8F8	MIEF1 upstream open reading frame protein OS=Homo sapiens OX=9606 GN=MIEF1 PE=1 SV=1
Medium	A0A5C2G7D0	IGH c512_heavy__IGHV1-69_IGHD5-12_IGHJ3 (Fragment) OS=Homo sapiens OX=9606 PE=2 SV=1
Medium	Q5JPB2	Zinc finger protein 831 OS=Homo sapiens OX=9606 GN=ZNF831 PE=2 SV=4
Medium	A0A7S5BXS9	IGH c428_heavy_IGHV4-34_IGHD3-16_IGHJ5 (Fragment) OS=Homo sapiens OX=9606 PE=2 SV=1
Medium	Q86SE5	RNA-binding Raly-like protein OS=Homo sapiens OX=9606 GN=RALYL PE=1 SV=2
Medium	A0A5C2GUT7	IG c642_light_IGKV3-20_IGKJ1 (Fragment) OS=Homo sapiens OX=9606 PE=2 SV=1
Medium	Q8TAT1	Basic helix-loop-helix family, member e41 OS=Homo sapiens OX=9606 GN=BHLHE41 PE=2 SV=1
Medium	A0A5C2GNZ0	IG c878_light_IGKV1-5_IGKJ2 (Fragment) OS=Homo sapiens OX=9606 PE=2 SV=1
Medium	A0A5C2GW09	IG c1641_light_IGKV1-6_IGKJ4 (Fragment) OS=Homo sapiens OX=9606 PE=2 SV=1
Medium	C9JLH5	Elongator complex protein 6 (Fragment) OS=Homo sapiens OX=9606 GN=ELP6 PE=1 SV=1
Medium	A0A7S5EUT2	IGH c152_heavy_IGHV1-46_IGHD6-19_IGHJ3 (Fragment) OS=Homo sapiens OX=9606 PE=2 SV=1
Medium	A0A024RBQ0	Calcium/calmodulin-dependent protein kinase kinase 2, beta, isoform CRA_f OS=Homo sapiens OX=9606 GN=CAMKK2 PE=4 SV=1
Medium	Q14210	Lymphocyte antigen 6D OS=Homo sapiens OX=9606 GN=LY6D PE=1 SV=1
Medium	A0A5C2FYH6	IGL c2011_light_IGKV1D-33_IGKJ4 (Fragment) OS=Homo sapiens OX=9606 PE=2 SV=1
Medium	A0A5C2H098	IG c1500_light_IGKV3-15_IGKJ1 (Fragment) OS=Homo sapiens OX=9606 PE=2 SV=1
Medium	O95968	Secretoglobin family 1D member 1 OS=Homo sapiens OX=9606 GN=SCGB1D1 PE=1 SV=1
Medium	Q9H0U3	Magnesium transporter protein 1 OS=Homo sapiens OX=9606 GN=MAGT1 PE=1 SV=1
Medium	A0A7S5C064	IGH c1551_heavy_IGHV3-48_IGHD1-26_IGHJ3 (Fragment) OS=Homo sapiens OX=9606 PE=2 SV=1
Medium	Q9H6V3	C10orf2 protein OS=Homo sapiens OX=9606 GN=C10orf2 PE=2 SV=1
Medium	Q96PE2	Rho guanine nucleotide exchange factor 17 OS=Homo sapiens OX=9606 GN=ARHGEF17 PE=1 SV=1
Medium	F5H5A1	Malonate--CoA ligase ACSF3, mitochondrial OS=Homo sapiens OX=9606 GN=ACSF3 PE=1 SV=1
Medium	A0A1B0GUN9	Espin OS=Homo sapiens OX=9606 GN=ESPN PE=1 SV=1
Medium	A0A7S5C4H0	IGH c3956_heavy_IGHV1-69_IGHD3-22_IGHJ6 (Fragment) OS=Homo sapiens OX=9606 PE=2 SV=1
Medium	A0A087X283	Ubiquitin-conjugating enzyme E2 E2 OS=Homo sapiens OX=9606 GN=UBE2E2 PE=1 SV=1
Medium	A0A5C2GV07	IG c1385_light_IGKV1-9_IGKJ3 (Fragment) OS=Homo sapiens OX=9606 PE=2 SV=1
Medium	A0A0S2Z471	Creatine kinase (Fragment) OS=Homo sapiens OX=9606 GN=CKB PE=2 SV=1
Medium	B7Z3H4	Beta-transducin repeat containing isoform 4 OS=Homo sapiens OX=9606 GN=BTRC PE=1 SV=1
Medium	Q7Z2W4	Zinc finger CCCH-type antiviral protein 1 OS=Homo sapiens OX=9606 GN=ZC3HAV1 PE=1 SV=3
Medium	F8VP00	ATP-dependent 6-phosphofructokinase, muscle type (Fragment) OS=Homo sapiens OX=9606 GN=PFKM PE=1 SV=8
Medium	B3KN08	cDNA FLJ13167 fis, clone NT2RP3003726, highly similar to Spermatogenesis-associated protein 2 OS=Homo sapiens OX=9606 PE=2 SV=1
Medium	Q8TA86	Retinitis pigmentosa 9 protein OS=Homo sapiens OX=9606 GN=RP9 PE=1 SV=2
Medium	A0A5C2G6J2	IGH c277_heavy__IGHV3-49_IGHD3-22_IGHJ4 (Fragment) OS=Homo sapiens OX=9606 PE=2 SV=1
Medium	W8GIU9	Kallikrein 10 protein 1 (Fragment) OS=Homo sapiens OX=9606 GN=KLK10 PE=2 SV=1
Medium	A0A5C2FYJ1	IGL c1236_light_IGKV1-6_IGKJ1 (Fragment) OS=Homo sapiens OX=9606 PE=2 SV=1
Medium	A0A5C2G5M5	IGL c3155_light_IGKV1-33_IGKJ4 (Fragment) OS=Homo sapiens OX=9606 PE=2 SV=1
Medium	A0A6Q8PFI8	Solute carrier family 2, facilitated glucose transporter member 1 OS=Homo sapiens OX=9606 GN=SLC2A1 PE=1 SV=1
Medium	A0A5C2G769	IGL c187_light_IGKV1-39_IGKJ5 (Fragment) OS=Homo sapiens OX=9606 PE=2 SV=1
Medium	B4DYE2	cDNA FLJ61467, highly similar to Chromosome-associated kinesin KIF4A OS=Homo sapiens OX=9606 PE=2 SV=1
Medium	A0A5C2GCJ9	IGL c313_light_IGKV1D-17_IGKJ3 (Fragment) OS=Homo sapiens OX=9606 PE=2 SV=1
Medium	A0A087WUC6	Microsomal signal peptidase 25 kDa subunit OS=Homo sapiens OX=9606 GN=SPCS2 PE=1 SV=1
Medium	F6SS63	TAK1-binding protein 3, isoform CRA_c OS=Homo sapiens OX=9606 GN=TAB3 PE=1 SV=2
Medium	A0A0X9SZU9	MS-B1 heavy chain variable region (Fragment) OS=Homo sapiens OX=9606 PE=2 SV=1
Medium	X6RAC9	Eukaryotic translation initiation factor 4C OS=Homo sapiens OX=9606 GN=EIF1AX PE=1 SV=1
Medium	A0A5C2GCX7	IGH + IGL c598_heavy_IGHV1-69_IGHD5-18_IGHJ3 (Fragment) OS=Homo sapiens OX=9606 PE=2 SV=1
Medium	A1A4V9	Coiled-coil domain-containing protein 189 OS=Homo sapiens OX=9606 GN=CCDC189 PE=2 SV=1
Medium	Q04760	Lactoylglutathione lyase OS=Homo sapiens OX=9606 GN=GLO1 PE=1 SV=4
Medium	O43150	Arf-GAP with SH3 domain, ANK repeat and PH domain-containing protein 2 OS=Homo sapiens OX=9606 GN=ASAP2 PE=1 SV=3
Medium	B4DE42	cDNA FLJ60422, highly similar to Myb-binding protein 1A OS=Homo sapiens OX=9606 PE=2 SV=1
Medium	M4VR43	Apolipoprotein B editing enzyme catalytic polypeptide-like 3F OS=Homo sapiens OX=9606 GN=APOBEC3F PE=2 SV=1
Medium	A0A5C2GBB4	IGH + IGL c375_light_IGKV1-33_IGKJ4 (Fragment) OS=Homo sapiens OX=9606 PE=2 SV=1
Medium	Q8N4P6	Leucine-rich repeat-containing protein 71 OS=Homo sapiens OX=9606 GN=LRRC71 PE=2 SV=1
Medium	Q9NRL3	Striatin-4 OS=Homo sapiens OX=9606 GN=STRN4 PE=1 SV=2
Medium	F8WEJ5	Asparagine synthetase [glutamine-hydrolyzing] OS=Homo sapiens OX=9606 GN=ASNS PE=1 SV=1
Medium	J3QLR8	28S ribosomal protein S23, mitochondrial OS=Homo sapiens OX=9606 GN=MRPS23 PE=1 SV=1
Medium	A0A3B3IRK2	Arachidonate 12-lipoxygenase, 12R-type (Fragment) OS=Homo sapiens OX=9606 GN=ALOX12B PE=1 SV=1
Medium	A0A5C2G636	IGL c4080_light_IGKV3-15_IGKJ4 (Fragment) OS=Homo sapiens OX=9606 PE=2 SV=1
Medium	A0A5C2GBT6	IGH + IGL c612_light_IGKV3-15_IGKJ1 (Fragment) OS=Homo sapiens OX=9606 PE=2 SV=1
Medium	P26447	Protein S100-A4 OS=Homo sapiens OX=9606 GN=S100A4 PE=1 SV=1
Medium	A0A024R4K9	Ion channel TACAN OS=Homo sapiens OX=9606 GN=TMEM120A PE=1 SV=1
Medium	A0A2U8J983	Ig heavy chain variable region (Fragment) OS=Homo sapiens OX=9606 GN=IgH PE=2 SV=1
Medium	Q9Y3E7	Charged multivesicular body protein 3 OS=Homo sapiens OX=9606 GN=CHMP3 PE=1 SV=3
Medium	A0A024RDS0	HCG2019919, isoform CRA_a OS=Homo sapiens OX=9606 GN=hCG_2019919 PE=4 SV=1
Medium	L0R6M5	Alternative protein PRDM5 OS=Homo sapiens OX=9606 GN=PRDM5 PE=4 SV=1
Medium	A0A7S5C310	IGH c2977_heavy_IGHV1-69_IGHD3-22_IGHJ3 (Fragment) OS=Homo sapiens OX=9606 PE=2 SV=1
Medium	B4DL07	cDNA FLJ53353, highly similar to ATP-binding cassette sub-family D member 3 OS=Homo sapiens OX=9606 PE=2 SV=1
Medium	A0A5C2GKG0	IG c472_light_IGKV3D-15_IGKJ4 (Fragment) OS=Homo sapiens OX=9606 PE=2 SV=1
Medium	Q9HC84	Mucin-5B OS=Homo sapiens OX=9606 GN=MUC5B PE=1 SV=3
Medium	B8ZZ51	Malate dehydrogenase, cytoplasmic OS=Homo sapiens OX=9606 GN=MDH1 PE=1 SV=1
Medium	A0A5C2G1I5	IGL c3019_light_IGKV3-20_IGKJ1 (Fragment) OS=Homo sapiens OX=9606 PE=2 SV=1
Medium	A0A5C2H1M4	IG c826_light_IGKV1-27_IGKJ5 (Fragment) OS=Homo sapiens OX=9606 PE=2 SV=1
Medium	A0A5C2FZ58	IGL c1964_light_IGKV1-39_IGKJ5 (Fragment) OS=Homo sapiens OX=9606 PE=2 SV=1
Medium	A0A5C2GM18	IG c1021_light_IGKV1-5_IGKJ3 (Fragment) OS=Homo sapiens OX=9606 PE=2 SV=1
Medium	A0A5C2GUT4	IG c1191_light_IGKV1-33_IGKJ2 (Fragment) OS=Homo sapiens OX=9606 PE=2 SV=1
Medium	Q9Y3R4	Sialidase-2 OS=Homo sapiens OX=9606 GN=NEU2 PE=1 SV=2
Medium	B4DPB7	Elongator complex protein 3 OS=Homo sapiens OX=9606 PE=2 SV=1
Medium	A0A5C2GCY9	IGH + IGL c558_light_IGKV1-12_IGKJ4 (Fragment) OS=Homo sapiens OX=9606 PE=2 SV=1
Medium	Q96GA3	Protein LTV1 homolog OS=Homo sapiens OX=9606 GN=LTV1 PE=1 SV=1
Medium	P50583	Bis(5'-nucleosyl)-tetraphosphatase [asymmetrical] OS=Homo sapiens OX=9606 GN=NUDT2 PE=1 SV=3
Medium	B5BUC0	Glycogen synthase kinase-3 beta (Fragment) OS=Homo sapiens OX=9606 GN=GSK3B PE=2 SV=1
Medium	A0A5C2G973	IGH + IGL c233_heavy_IGHV1-18_IGHD3-3_IGHJ4 (Fragment) OS=Homo sapiens OX=9606 PE=2 SV=1
Medium	A0A5C2GBI8	IGH + IGL c455_light_IGLV2-23_IGLJ3 (Fragment) OS=Homo sapiens OX=9606 PE=2 SV=1
Medium	B4E127	G/T mismatch-specific thymine DNA glycosylase OS=Homo sapiens OX=9606 GN=TDG PE=1 SV=1
Medium	A0A7S5BYR9	IGH c652_heavy_IGHV1-69_IGHD2-8_IGHJ6 (Fragment) OS=Homo sapiens OX=9606 PE=2 SV=1
Medium	A0A024R7N1	GEM interacting protein, isoform CRA_b OS=Homo sapiens OX=9606 GN=GMIP PE=4 SV=1
Medium	B7Z592	Zinc finger CCCH domain-containing protein 15 OS=Homo sapiens OX=9606 PE=2 SV=1
Medium	A0A5C2GBN5	IGL c53_light_IGKV1D-13_IGKJ2 (Fragment) OS=Homo sapiens OX=9606 PE=2 SV=1
Medium	C9JVQ0	Small nuclear ribonucleoprotein G OS=Homo sapiens OX=9606 GN=SNRPG PE=1 SV=1
Medium	A0A5C2GX22	IG c1196_light_IGKV1D-39_IGKJ1 (Fragment) OS=Homo sapiens OX=9606 PE=2 SV=1
Medium	Q92820	Gamma-glutamyl hydrolase OS=Homo sapiens OX=9606 GN=GGH PE=1 SV=2
Medium	A0A5C2GJU4	IGH + IGL c287_light_IGKV1-8_IGKJ1 (Fragment) OS=Homo sapiens OX=9606 PE=2 SV=1
Medium	A0A2U8J8X6	Ig heavy chain variable region (Fragment) OS=Homo sapiens OX=9606 GN=IgH PE=2 SV=1
Medium	A0A7S5C0Y0	IGH c1295_heavy_IGHV4-4_IGHD4-11_IGHJ5 (Fragment) OS=Homo sapiens OX=9606 PE=2 SV=1
Medium	Q5QPQ0	Acyl-protein thioesterase 2 OS=Homo sapiens OX=9606 GN=LYPLA2 PE=1 SV=1
Medium	A0A5C2GP91	IG c1205_heavy_IGHV4-39_IGHD6-19_IGHJ4 (Fragment) OS=Homo sapiens OX=9606 PE=2 SV=1
Medium	E7EQB3	tRNA-splicing endonuclease subunit Sen34 OS=Homo sapiens OX=9606 GN=TSEN34 PE=1 SV=2
Medium	Q9UDW3	Zinc finger matrin-type protein 5 OS=Homo sapiens OX=9606 GN=ZMAT5 PE=1 SV=1
Medium	C9JFR7	Cytochrome c (Fragment) OS=Homo sapiens OX=9606 GN=CYCS PE=1 SV=1
Medium	P32320	Cytidine deaminase OS=Homo sapiens OX=9606 GN=CDA PE=1 SV=2
Medium	A0A5C2GC46	IGH + IGL c238_light_IGKV1D-39_IGKJ1 (Fragment) OS=Homo sapiens OX=9606 PE=2 SV=1
Medium	P49755	Transmembrane emp24 domain-containing protein 10 OS=Homo sapiens OX=9606 GN=TMED10 PE=1 SV=2
Medium	A8K6C9	Insulin-like growth factor II OS=Homo sapiens OX=9606 PE=2 SV=1
Medium	A0A3B3ISP9	Cytoplasmic dynein 2 heavy chain 1 OS=Homo sapiens OX=9606 GN=DYNC2H1 PE=1 SV=1
Medium	H7C1D1	Uncharacterized protein (Fragment) OS=Homo sapiens OX=9606 PE=4 SV=2
Medium	A0A286YF97	Mitogen-activated protein kinase OS=Homo sapiens OX=9606 GN=MAPK10 PE=1 SV=1
Medium	Q9BXS2	Chromosome 10 open reading frame 110, isoform CRA_a OS=Homo sapiens OX=9606 GN=C10orf110 PE=4 SV=1
Medium	A0A7S5C049	IGH c1104_heavy_IGHV1-69_IGHD3-16_IGHJ6 (Fragment) OS=Homo sapiens OX=9606 PE=2 SV=1
Medium	H3BPK7	Alanine--tRNA ligase OS=Homo sapiens OX=9606 GN=AARS1 PE=1 SV=4
Medium	A0A590UK20	Ankyrin repeat domain-containing protein 30B OS=Homo sapiens OX=9606 GN=ANKRD30B PE=4 SV=1
Medium	A0A7S5BXC5	IGH c158_heavy_IGHV3-30_IGHD4-23_IGHJ2 (Fragment) OS=Homo sapiens OX=9606 PE=2 SV=1
Medium	Q8WZA0	Protein LZIC OS=Homo sapiens OX=9606 GN=LZIC PE=1 SV=1
Medium	V9HWB5	Inorganic diphosphatase OS=Homo sapiens OX=9606 GN=HEL-S-66p PE=2 SV=1
Medium	Q9HCU4	Cadherin EGF LAG seven-pass G-type receptor 2 OS=Homo sapiens OX=9606 GN=CELSR2 PE=1 SV=1
Medium	Q96P11	28S rRNA (cytosine-C(5))-methyltransferase OS=Homo sapiens OX=9606 GN=NSUN5 PE=1 SV=2
Medium	H0Y827	Peptidylprolyl isomerase (Fragment) OS=Homo sapiens OX=9606 GN=FKBP10 PE=1 SV=1
Medium	P62891	60S ribosomal protein L39 OS=Homo sapiens OX=9606 GN=RPL39 PE=1 SV=2
Medium	A0A140VKE5	Sulfhydryl oxidase OS=Homo sapiens OX=9606 GN=QSCN6 PE=2 SV=1
Medium	Q8IWB4	Spermatogenesis-associated protein 31A7 OS=Homo sapiens OX=9606 GN=SPATA31A7 PE=1 SV=4
Medium	M0R3H5	Rho guanine nucleotide exchange factor 1 (Fragment) OS=Homo sapiens OX=9606 GN=ARHGEF1 PE=1 SV=1
Medium	A0A024R8D4	Mitochondrial ribosomal protein S2, isoform CRA_a OS=Homo sapiens OX=9606 GN=MRPS2 PE=3 SV=1
Medium	D3DSM7	Collagen, type VI, alpha 1, isoform CRA_a OS=Homo sapiens OX=9606 GN=COL6A1 PE=4 SV=1
Medium	A0A7S5BZF3	IGH c1318_heavy_IGHV3-33_IGHD3-10_IGHJ2 (Fragment) OS=Homo sapiens OX=9606 PE=2 SV=1
Medium	B4DXJ6	cDNA FLJ61453, highly similar to Adapter-relatedprotein complex 2 alpha- 1 subunit OS=Homo sapiens OX=9606 PE=2 SV=1
Medium	O14545	TRAF-type zinc finger domain-containing protein 1 OS=Homo sapiens OX=9606 GN=TRAFD1 PE=1 SV=1
Medium	Q8N283	Ankyrin repeat domain-containing protein 35 OS=Homo sapiens OX=9606 GN=ANKRD35 PE=2 SV=2
Medium	A0A7S5BZ77	IGH c184_heavy_IGHV1-2_IGHD5-18_IGHJ4 (Fragment) OS=Homo sapiens OX=9606 PE=2 SV=1
Medium	O14732	Inositol monophosphatase 2 OS=Homo sapiens OX=9606 GN=IMPA2 PE=1 SV=1
Medium	A0A5C2GMH7	IG c1100_light_IGKV1D-13_IGKJ4 (Fragment) OS=Homo sapiens OX=9606 PE=2 SV=1
Medium	A0A5C2G2S6	IGL c1717_light_IGKV1D-39_IGKJ4 (Fragment) OS=Homo sapiens OX=9606 PE=2 SV=1
Medium	A0A0D9SFM0	E3 ubiquitin-protein ligase SHPRH OS=Homo sapiens OX=9606 GN=SHPRH PE=1 SV=1
Medium	P46977	Dolichyl-diphosphooligosaccharide--protein glycosyltransferase subunit STT3A OS=Homo sapiens OX=9606 GN=STT3A PE=1 SV=2
Medium	A0A5C2G2R3	IGL c633_light_IGKV3-20_IGKJ4 (Fragment) OS=Homo sapiens OX=9606 PE=2 SV=1
Medium	O15294	UDP-N-acetylglucosamine--peptide N-acetylglucosaminyltransferase 110 kDa subunit OS=Homo sapiens OX=9606 GN=OGT PE=1 SV=3
Medium	A0A5C2GR04	IG c71_heavy_IGHV4-39_IGHD6-19_IGHJ3 (Fragment) OS=Homo sapiens OX=9606 PE=2 SV=1
Medium	B3KWL6	cDNA FLJ43306 fis, clone NT2NE2006909, highly similar to Methionine aminopeptidase 2 OS=Homo sapiens OX=9606 PE=2 SV=1
Medium	Q59HG8	Gamma-aminobutyric acid (GABA) B receptor 1 isoform c variant (Fragment) OS=Homo sapiens OX=9606 PE=2 SV=1
Medium	A0A5C2FZH4	IGL c2322_light_IGKV1-12_IGKJ3 (Fragment) OS=Homo sapiens OX=9606 PE=2 SV=1
Medium	A0A7I2V5C5	Cathepsin C OS=Homo sapiens OX=9606 GN=CTSC PE=1 SV=1
Medium	A0A5C2GSJ9	IG c769_heavy_IGHV3-23_IGHD6-19_IGHJ3 (Fragment) OS=Homo sapiens OX=9606 PE=2 SV=1
Medium	E7EUG2	Nuclear pore complex-interacting protein family member B5 OS=Homo sapiens OX=9606 GN=NPIPB5 PE=3 SV=2
Medium	Q8NI67	OK/SW-CL.6 OS=Homo sapiens OX=9606 GN=OK/SW-cl.6 PE=2 SV=1
Medium	Q9HDC9	Adipocyte plasma membrane-associated protein OS=Homo sapiens OX=9606 GN=APMAP PE=1 SV=2
Medium	Q8IV04	Carabin OS=Homo sapiens OX=9606 GN=TBC1D10C PE=1 SV=1
Medium	Q460N5	Protein mono-ADP-ribosyltransferase PARP14 OS=Homo sapiens OX=9606 GN=PARP14 PE=1 SV=3
Medium	J3QL56	Protein SCO1 homolog, mitochondrial OS=Homo sapiens OX=9606 GN=SCO1 PE=1 SV=1
Medium	A0A5C2GL79	IG c559_light_IGLV2-23_IGLJ1 (Fragment) OS=Homo sapiens OX=9606 PE=2 SV=1
